# Supplementary material for: The Candida albicans Cdk8-dependent phosphoproteome reveals repression of hyphal growth through a Flo8-dependent pathway
Source: PLoS Genet. 2022 Jan 4;18(1):e1009622. doi: 10.1371/journal.pgen.1009622 (PMC8769334; doi:10.1371/journal.pgen.1009622)
Supplement: S2 Table — Sheets one and two compare the effect of drug versus vehicle in SC5314 WT and ssn3AS, respectively. (XLSX) [file pgen.1009622.s004.xlsx]

## Sheet: Legend
	Table S2: RNA seq analyses to determine the effects of specific inhibition of ssn3as by 3-MB-PP1 (drug). Sheets one and two compare the effect of drug versus vehicle in SC5314 and ssn3as, respectively.

## Sheet: as-ssn3 Drug Vs Vehicle
genes	genes	gene name	logFC	logCPM	PValue	FDR		Fold change
orf19.3374	C4_03470C_A	ECE1	5.52394	7.02073	5.33124e-250	7.27715e-247		46.0119
orf19.1321	C4_03570W_A	HWP1	4.4692	7.11146	1.56285e-280	4.26658e-277		22.1495
orf19.1816	CR_07070C_A	ALS3	3.86612	9.46902	0	0		14.5821
orf19.6277	C1_06340W_A		3.83307	1.55179	1.33651e-36	6.63393e-35		14.2518
orf19.701	CR_06670W_A	CFL11	3.64603	-0.0742141	7.10064e-12	4.42574e-11		12.5188
orf19.3655	C6_00730W_A		3.3082	0.621267	1.12003e-17	1.26612e-16		9.90528
orf19.3981	C5_04930C_A	MAL31	3.26399	2.97674	3.14135e-45	2.1175e-43		9.60636
orf19.1327	C4_03520C_A	RBT1	3.19691	6.00836	9.78016e-144	3.81426e-141		9.16992
orf19.5399	C3_00600W_A	IFF11	3.08986	1.67363	1.27378e-26	3.3926e-25		8.51414
orf19.7456	C3_06670C_A		2.92345	1.12316	5.24729e-21	8.32855e-20		7.58659
orf19.3829	C4_04530C_A	PHR1	2.88174	5.33467	5.48789e-205	4.99398e-202		7.37041
orf19.3131	C4_06780C_A	OYE32	2.85279	6.47106	4.30904e-229	4.70547e-226		7.22394
orf19.5542	C6_02710C_A	SAP6	2.8077	1.02736	7.91472e-19	9.88887e-18		7.00169
orf19.4567	C4_02230C_A		2.70378	0.942067	6.65722e-17	6.99008e-16		6.51509
orf19.4975	C1_13450W_A	HYR1	2.64267	5.80385	1.58469e-203	1.23605e-200		6.24488
orf19.34	C2_06590C_A	GIT1	2.53856	2.60901	9.73402e-46	6.72757e-44		5.81008
orf19.6323	C6_00140C_A	HPA2	2.41362	2.08443	1.85269e-26	4.8868e-25		5.32809
orf19.4936.1	C1_13100W_A		2.37131	2.26441	3.8556e-14	3.03775e-13		5.1741
orf19.3433	C6_01510W_A	OYE23	2.36435	4.13122	7.36448e-46	5.15514e-44		5.14921
orf19.7550	CR_09780C_A	IFA14	2.26193	2.0637	5.53376e-24	1.13162e-22		4.79633
orf19.5760	C6_03850C_A	IHD1	2.25742	4.54884	2.59608e-55	2.5772e-53		4.78134
orf19.238	C3_02480C_A	CCP1	2.22048	10.3794	1.23302e-179	7.48032e-177		4.66047
orf19.5741	C6_03700W_A	ALS1	2.18088	11.3979	4.81325e-274	8.76011e-271		4.53431
orf19.3325			2.14458	3.62453	1.83354e-48	1.39043e-46		4.42162
orf19.2770.1	C4_02320C_A	SOD1	2.13184	4.9807	1.92712e-84	3.75788e-82		4.38276
orf19.2461	C1_05880W_A	PRN4	2.12234	6.03961	3.22906e-167	1.46922e-164		4.354
orf19.1277	C4_05900C_A		2.10179	3.95726	5.92182e-68	7.88613e-66		4.29243
orf19.1409.2	C4_04380C_A		2.07624	1.94433	4.82748e-17	5.14607e-16		4.21706
orf19.4371	CR_03720W_A	TAL1	1.91305	6.96031	2.58649e-182	1.76528e-179		3.76603
orf19.5005	C1_13670W_A	OSM2	1.90439	4.20804	1.38456e-56	1.51194e-54		3.74351
orf19.1190	C6_00300C_A	STV1	1.85062	5.04636	7.01315e-76	1.16036e-73		3.60655
orf19.1978	C5_00890C_A	GIT2	1.84537	4.56346	1.10371e-62	1.28218e-60		3.59344
orf19.5809	C2_02950W_A		1.84536	0.981483	8.95038e-10	4.52911e-09		3.59342
orf19.4602	C4_01900C_A	MDH1-1	1.8223	8.22263	1.17668e-137	4.28313e-135		3.53645
orf19.6905	C7_01230C_A		1.80184	4.32089	1.59927e-49	1.26551e-47		3.48664
orf19.6036	C1_00690W_A	RIC1	1.75986	1.16665	9.69078e-11	5.40466e-10		3.38666
orf19.1334	C7_03410C_A		1.75535	2.8995	1.59173e-25	3.79514e-24		3.37609
orf19.3877	CR_06250W_A		1.7518	0.299925	4.8424e-06	1.57004e-05		3.36778
orf19.1589.1	C2_02640C_A		1.73914	2.2096	1.06004e-16	1.07781e-15		3.33835
orf19.86	C6_00850W_A		1.73546	3.71963	8.101e-29	2.54204e-27		3.32987
orf19.6755	C3_07360W_A	DLD2	1.73249	1.85763	6.99879e-12	4.37224e-11		3.32302
orf19.5000	C1_13630W_A	CYB2	1.73049	4.87762	8.16237e-65	1.01288e-62		3.3184
orf19.113	C6_01070C_A	CIP1	1.72904	0.481766	4.51681e-06	1.47147e-05		3.31507
orf19.125	C6_01180C_A	EBP1	1.71363	6.49726	2.47136e-68	3.37341e-66		3.27984
orf19.6608	CR_09530C_A		1.70786	2.55158	4.67093e-23	9.04006e-22		3.26676
orf19.7522	CR_00130C_A		1.70437	4.40468	3.54905e-56	3.72651e-54		3.25886
orf19.2833	CR_02750C_A	PGA34	1.69136	0.387947	3.40688e-06	1.13011e-05		3.22962
orf19.3219	C5_03930C_A		1.67921	3.46473	4.73356e-25	1.08593e-23		3.20253
orf19.6229	C1_06810W_A	CAT1	1.67202	12.2725	2.38991e-99	6.21376e-97		3.18659
orf19.7531	CR_00090C_A		1.66122	3.60388	4.84549e-32	1.82458e-30		3.16284
orf19.5892	C3_04420W_A		1.64615	3.36299	5.29491e-27	1.43832e-25		3.12997
orf19.6000	C3_05220W_A	CDR1	1.64536	7.10069	1.50023e-127	5.11955e-125		3.12826
orf19.827	C2_03970W_A		1.64018	2.58265	1.13684e-20	1.71468e-19		3.11704
orf19.610	CR_07890W_A	EFG1	1.60642	5.25922	1.25185e-67	1.62741e-65		3.04495
orf19.4527	C1_01980W_A	HGT1	1.60609	9.81557	2.98236e-176	1.62837e-173		3.04426
orf19.7056	C7_00630C_A		1.60194	5.84619	1.78674e-85	3.75214e-83		3.03551
orf19.5307	C4_04030W_A	JEN2	1.59737	4.32388	1.60867e-41	9.54712e-40		3.0259
orf19.1064	C1_04290C_A	ACS2	1.58167	9.18938	1.29098e-173	6.40797e-171		2.99316
orf19.2863	CR_03000C_A		1.57707	0.59757	1.83697e-06	6.29226e-06		2.98364
orf19.6116	CR_07490C_A	GLK4	1.57382	0.864233	1.42448e-06	4.96976e-06		2.97691
orf19.2396	CR_03280W_A	IFR2	1.56627	5.5118	1.92788e-76	3.28944e-74		2.96137
orf19.7504	CR_00290W_A		1.56624	6.50932	4.13111e-96	9.8069e-94		2.96131
orf19.1868	C2_07570W_A	RNR22	1.55588	2.17044	9.68888e-12	5.98431e-11		2.94013
orf19.3278	CR_00780C_A	GSY1	1.55079	5.51661	3.17259e-69	4.68171e-67		2.92978
orf19.5840	C2_02670C_A		1.55046	0.0193174	9.96957e-05	0.000264756		2.92911
orf19.5725	C6_03580W_A	CCZ1	1.5467	1.54831	3.20379e-10	1.69832e-09		2.92149
orf19.5908	C3_04530C_A	TEC1	1.54633	8.30758	7.54657e-115	2.28913e-112		2.92073
orf19.6028	C1_00780C_A	HGC1	1.54394	5.00555	1.47393e-48	1.14966e-46		2.9159
orf19.6840	C1_04470C_A		1.54282	0.570944	4.94165e-05	0.000138579		2.91363
orf19.3171	C5_02000C_A	ACH1	1.52849	8.10271	1.51256e-118	4.85797e-116		2.88483
orf19.5112	C1_08320W_A	TKL1	1.5229	6.37885	6.91324e-95	1.57276e-92		2.87368
orf19.7350	C3_05710W_A	RCT1	1.51052	4.55843	6.91562e-36	3.37137e-34		2.84912
orf19.5131	C7_03240W_A		1.49848	3.73733	2.51773e-32	9.68085e-31		2.82546
orf19.4633	C4_01510W_A		1.49252	3.59686	7.14395e-33	2.955e-31		2.81381
orf19.2269	C2_07140W_A		1.4919	2.56696	1.34151e-18	1.63132e-17		2.8126
orf19.4898	C1_10280C_A		1.48765	2.6612	2.0219e-21	3.38637e-20		2.80432
orf19.4624	C4_01690C_A		1.48751	1.62629	2.07082e-11	1.24936e-10		2.80405
orf19.1917	C2_00060C_A		1.48237	6.52701	8.37484e-85	1.69358e-82		2.79407
orf19.6763	C3_07310C_A	SLK19	1.47458	6.15113	1.55778e-75	2.50161e-73		2.77903
orf19.4899	C1_10290W_A	GCA1	1.47365	0.715535	4.29405e-06	1.40477e-05		2.77724
orf19.1203	C6_00410C_A	SRO77	1.4699	4.75194	4.58535e-50	3.73672e-48		2.77002
orf19.6318	CR_04730W_A		1.45626	3.36826	1.78616e-23	3.55929e-22		2.74396
orf19.1285	C5_04050W_A		1.4505	4.73451	8.96766e-41	5.20887e-39		2.73303
orf19.2510	C3_01070C_A		1.44569	1.01087	7.66485e-07	2.74427e-06		2.72394
orf19.7512	CR_00220W_A		1.44372	2.00798	1.6315e-12	1.08107e-11		2.72021
orf19.3931	C5_04440C_A	SFC1	1.43915	3.40274	7.63902e-26	1.86201e-24		2.7116
orf19.2699	C4_02940W_A	ABP1	1.4276	5.5598	2.19322e-51	1.87109e-49		2.68999
orf19.5958	C3_04890W_A	CDR2	1.42457	3.48238	1.33254e-27	3.80926e-26		2.68434
orf19.5382	C3_00740W_A		1.42135	0.790991	0.0333905	0.0551459		2.67835
orf19.4393	CR_03500W_A	CIT1	1.42118	8.22444	1.6164e-100	4.64503e-98		2.67805
orf19.7328	CR_09330C_A		1.40911	5.69672	3.85727e-69	5.46069e-67		2.65572
orf19.6875	C2_05650W_A	VPS35	1.40871	4.0024	2.58733e-31	9.54516e-30		2.65499
orf19.3461	C6_02210W_A		1.40377	1.09031	6.45143e-07	2.3452e-06		2.64593
orf19.5342	C2_10630W_A		1.38653	3.4303	5.14531e-22	9.18084e-21		2.6145
orf19.3340	C1_01520C_A	SOD2	1.38166	5.2323	5.55637e-50	4.46144e-48		2.60569
orf19.2451	C1_05960W_A	PGA45	1.37777	5.42614	1.62415e-54	1.58355e-52		2.59867
orf19.5024	C1_13860C_A	GND1	1.37687	8.53539	8.4079e-88	1.83629e-85		2.59704
orf19.1725	C3_01260C_A		1.37648	5.0438	5.3919e-51	4.5292e-49		2.59635
orf19.5805	C2_02980C_A	DLD1	1.37367	4.13198	9.9104e-25	2.17312e-23		2.5913
orf19.4380.1	CR_03620C_A		1.36971	2.25029	3.54475e-14	2.80602e-13		2.58419
orf19.3323	C1_01340C_A		1.36913	1.66165	3.59884e-09	1.71015e-08		2.58315
orf19.3053	C1_03510C_A		1.36381	2.3907	6.55124e-12	4.10675e-11		2.57365
orf19.2710	C4_02860W_A		1.36235	3.64784	8.7256e-28	2.53414e-26		2.57104
orf19.1180	C6_00210W_A		1.35668	3.02877	1.43938e-13	1.0678e-12		2.56094
orf19.7098	C7_00240W_A		1.35424	5.69214	2.70983e-64	3.21645e-62		2.55663
orf19.7281	CR_08860W_A	PDK2	1.3509	3.91382	3.5058e-26	8.94471e-25		2.55071
orf19.3508	C6_02030C_A		1.34679	1.5802	9.42247e-09	4.28365e-08		2.54345
orf19.6586	C7_01430C_A		1.33858	5.62316	4.35405e-38	2.28587e-36		2.52902
orf19.3811	C4_04710W_A	GYP1	1.33843	3.78026	3.65243e-21	5.98867e-20		2.52876
orf19.918	C3_04070C_A	CDR11	1.33553	5.63573	7.58622e-58	8.45322e-56		2.52368
orf19.434	C1_05300C_A	PRD1	1.33187	3.92109	4.086e-30	1.39435e-28		2.51729
orf19.6043	C1_00630W_A		1.32904	1.33665	4.66556e-07	1.72588e-06		2.51235
orf19.2883	C4_06510C_A	CSO99	1.32846	4.22157	1.5505e-21	2.62911e-20		2.51134
orf19.3355	C1_01650W_A	ISN1	1.32017	3.28782	5.85222e-18	6.68475e-17		2.49696
orf19.4732	C1_08740C_A	SEC24	1.31637	7.73484	8.99274e-79	1.63668e-76		2.49038
orf19.6788	C3_07120W_A		1.305	0.416029	0.000192643	0.000489908		2.47083
orf19.6690	C7_03580C_A		1.30434	0.656857	0.000212357	0.000536542		2.46971
orf19.6176	C3_07810C_A	SEC61	1.29672	9.00965	4.05996e-73	6.1576e-71		2.45669
orf19.4930	C1_13020C_A	SPC3	1.28983	3.80704	8.06948e-24	1.62581e-22		2.44499
orf19.4900	C1_10300W_A	MNN12	1.28855	4.81146	4.05694e-45	2.70133e-43		2.44283
orf19.5604	C6_03170C_A	MDR1	1.28002	4.02831	4.31747e-33	1.8709e-31		2.42842
orf19.540	CR_04490C_A		1.26973	3.07695	1.51111e-19	2.06197e-18		2.41116
orf19.5250	C1_12140W_A		1.26796	2.22093	3.25721e-10	1.72496e-09		2.40821
orf19.4998	C1_13620W_A	ROB1	1.2608	8.23909	5.82845e-97	1.44652e-94		2.39628
orf19.1369	C2_09810C_A		1.26072	1.15923	5.87729e-06	1.88322e-05		2.39615
orf19.1562	C2_02390W_A		1.25428	3.20237	7.07323e-21	1.10342e-19		2.38547
orf19.778	C1_04680W_A	PIL1	1.25382	4.87584	2.2867e-32	8.85487e-31		2.38471
orf19.1509	C2_01970C_A	ROD1	1.25329	6.83287	7.67602e-65	9.74676e-63		2.38385
orf19.1723	C3_01280W_A		1.24623	1.25228	3.36632e-06	1.11869e-05		2.37221
orf19.489	CR_04060C_A	DAP1	1.24289	4.9884	3.45464e-38	1.83129e-36		2.36672
orf19.3064.1	C1_03660W_A		1.24088	1.99722	5.00376e-08	2.09997e-07		2.36342
orf19.2966	C1_02780W_A		1.23655	2.51511	1.30464e-13	9.75799e-13		2.35635
orf19.3888	CR_06340C_A	PGI1	1.23581	5.30442	3.14424e-44	2.04375e-42		2.35513
orf19.897	C2_03310C_A	VPS20	1.23526	3.02739	1.83564e-15	1.65117e-14		2.35424
orf19.3878	CR_06260W_A		1.2337	1.69063	2.68602e-08	1.16486e-07		2.3517
orf19.6898	C7_01150W_A		1.2317	3.53953	1.35837e-16	1.36588e-15		2.34843
orf19.7305	CR_09090C_A		1.2303	0.802648	6.88888e-05	0.000187785		2.34616
orf19.1196	C6_00350W_A	PKH3	1.22936	5.14809	1.2155e-47	8.96843e-46		2.34463
orf19.3873	CR_06180W_A	ARC40	1.22468	5.11828	1.11446e-46	7.90254e-45		2.33704
orf19.272	C3_02810C_A	FAA21	1.21218	3.02707	1.8165e-18	2.17025e-17		2.31687
orf19.972	C5_00230C_A		1.20427	1.59269	1.48209e-05	4.48819e-05		2.3042
orf19.815	C2_04050C_A	DCK1	1.20294	8.9084	3.90049e-69	5.46069e-67		2.30208
orf19.1297	C4_03810W_A		1.20073	0.915286	0.000103844	0.000274571		2.29856
orf19.1822	C1_06280C_A	UME6	1.19783	5.14459	2.12594e-47	1.54769e-45		2.29395
orf19.5078	C1_08060W_A	OFR1	1.19739	3.62511	4.54203e-21	7.33713e-20		2.29324
orf19.6139	CR_07290W_A	FRE7	1.19513	2.30414	4.228e-11	2.47958e-10		2.28966
orf19.4109	C2_06100W_A	PMT4	1.19232	7.25012	1.75109e-81	3.29688e-79		2.28521
orf19.7579	CR_10030W_A	FGR34	1.19226	3.43267	1.54468e-21	2.62739e-20		2.28511
orf19.6140	CR_07280W_A	FRE30	1.1889	0.482138	0.00044	0.00105879		2.27979
orf19.2149	C6_04550C_A		1.18772	6.27247	7.51856e-56	7.74553e-54		2.27792
orf19.7140	C7_04280C_A		1.18451	3.58146	2.45176e-17	2.66665e-16		2.27286
orf19.734	CR_07150W_A	GLK1	1.17918	3.3294	9.3584e-11	5.22463e-10		2.26449
orf19.2810	C3_03990C_A	AAP1	1.17715	3.21264	2.00067e-17	2.18037e-16		2.2613
orf19.6554	C7_01700W_A		1.17402	3.12662	1.50749e-13	1.1153e-12		2.2564
orf19.7578	CR_10020C_A		1.17179	1.2862	6.84183e-06	2.17949e-05		2.25291
orf19.7680	CR_10860C_A	CTA26	1.16664	1.91594	4.80026e-07	1.7733e-06		2.24489
orf19.5286	CR_05380C_A	YCP4	1.16404	4.62256	4.347e-35	2.10041e-33		2.24084
orf19.6814	C3_06870W_A	TDH3	1.1624	7.57261	1.61388e-14	1.34531e-13		2.23829
orf19.1964	C5_01070C_A		1.15988	6.08889	3.28252e-42	1.9914e-40		2.23439
orf19.6850	C1_04560W_A		1.15824	0.88567	8.64074e-05	0.000231721		2.23185
orf19.4878	C1_10090C_A		1.15428	4.53628	9.70311e-27	2.59701e-25		2.22573
orf19.4939	C1_13120C_A	MON2	1.15085	2.88872	1.38226e-14	1.16289e-13		2.22045
orf19.4752	C1_08940C_A	MSN4	1.14908	3.68982	1.11856e-18	1.38175e-17		2.21773
orf19.6058			1.14871	4.10659	7.86541e-23	1.49115e-21		2.21715
orf19.5804	C2_02990C_A	HYU1	1.14627	3.95237	4.23811e-21	6.89788e-20		2.21341
orf19.2661	C1_06180W_A	TLO34	1.14537	2.69279	2.49851e-10	1.34668e-09		2.21203
orf19.3392	C6_01900C_A	DOG1	1.14185	5.06621	6.99363e-34	3.12993e-32		2.20664
orf19.3793	C4_04860W_A		1.13989	5.88569	1.65254e-48	1.27082e-46		2.20365
orf19.1830	C1_10580C_A		1.13821	0.498344	0.00102654	0.00231418		2.20108
orf19.6745	C3_07440W_A	TPI1	1.13649	6.01979	1.94374e-26	5.10232e-25		2.19846
orf19.7676	CR_10840C_A	XYL2	1.13599	3.60439	2.59205e-19	3.42678e-18		2.19769
orf19.4171	C4_00710W_A		1.13191	3.32291	2.05501e-15	1.84243e-14		2.19148
orf19.6544	C7_01780W_A	LPI9	1.13121	5.75045	6.28534e-52	5.53516e-50		2.19042
orf19.4774	C1_09160W_A	AOX1	1.12742	1.08829	4.17846e-05	0.000118825		2.18467
orf19.5157	C7_03040W_A		1.12353	0.483154	0.000716407	0.00165465		2.1788
orf19.5857	C3_04130W_A		1.12337	3.0416	4.26141e-16	4.08198e-15		2.17856
orf19.4019	C5_05260W_A		1.12276	1.74932	5.66245e-07	2.07218e-06		2.17763
orf19.338	C3_03410C_A		1.12222	3.51513	3.94541e-20	5.63925e-19		2.17682
orf19.1120	C5_03750W_A	FAV2	1.11924	0.573724	0.0010948	0.00244883		2.17232
orf19.2432	C1_06130C_A	HAC1	1.11271	6.78831	1.0168e-33	4.47718e-32		2.16251
orf19.3575	C2_05460W_A	CDC19	1.11184	6.65354	6.69215e-25	1.50367e-23		2.16121
orf19.2593	CR_01930C_A	BIO2	1.11069	2.51997	1.35875e-10	7.51646e-10		2.15949
orf19.4379	CR_03810W_A	PRP13	1.10846	2.42082	2.24794e-08	9.83473e-08		2.15615
orf19.251	C3_02610C_A	GLX3	1.10846	4.05642	4.50772e-13	3.16352e-12		2.15615
orf19.3770	C4_05070C_A	ARG8	1.10761	0.330694	0.00195239	0.00417059		2.15488
orf19.2262	C2_07070W_A		1.10632	3.0314	2.99343e-14	2.41777e-13		2.15295
orf19.4800	C1_09380W_A	RIM20	1.10603	2.46494	1.28621e-06	4.5104e-06		2.15252
orf19.6534.2	C7_01850C_A	CRN1	1.10459	6.65853	1.08231e-64	1.31321e-62		2.15038
orf19.3708	CR_07800W_A	SAP2	1.10449	4.34616	2.7919e-16	2.71242e-15		2.15023
orf19.6113			1.10123	1.96691	2.8084e-07	1.06931e-06		2.14538
orf19.7242	C1_14300C_A	NCR1	1.09878	3.02028	3.48339e-14	2.76846e-13		2.14173
orf19.3447	C6_01370W_A		1.09726	2.08872	2.12024e-09	1.03086e-08		2.13948
orf19.7077	C7_00430W_A		1.09647	1.45594	1.49692e-05	4.52557e-05		2.13831
orf19.3782	C4_04980W_A		1.09301	3.96263	1.747e-16	1.73041e-15		2.13318
orf19.5073	C1_08010W_A	DPM1	1.09262	5.78555	2.06326e-51	1.78816e-49		2.13261
orf19.346	C3_03480C_A	ALT1	1.0921	4.34543	5.55822e-27	1.50237e-25		2.13184
orf19.723	CR_06440C_A	BCR1	1.08438	6.2654	5.66365e-51	4.68539e-49		2.12047
orf19.1709	C3_01420C_A		1.08177	1.8842	0.000145744	0.000378214		2.11662
orf19.5337	C2_10580W_A	UBC15	1.08053	3.39918	4.3298e-12	2.76499e-11		2.11481
orf19.4024	C5_05300W_A	RIB5	1.07148	3.64237	1.56144e-19	2.12077e-18		2.10159
orf19.5859	C3_04160W_A	DAL8	1.07145	0.658954	0.000833026	0.00190625		2.10154
orf19.5537	C6_02670C_A	WSC2	1.06996	5.67752	1.07314e-36	5.37553e-35		2.09937
orf19.3003	C1_03100W_A		1.06726	4.92624	2.55782e-29	8.16706e-28		2.09545
orf19.424	C1_05410C_A	TRP99	1.06691	3.10385	8.04018e-11	4.54445e-10		2.09494
orf19.2116	C2_00160C_A	NAT2	1.06643	5.59976	1.73899e-36	8.55396e-35		2.09424
orf19.854	C2_03640W_A	UGA11	1.06529	2.26704	1.21528e-09	6.05978e-09		2.09258
orf19.7021	C7_00930W_A	GPH1	1.06474	2.60137	4.66369e-10	2.42512e-09		2.09179
orf19.6232	C1_06780W_A	NPR1	1.0632	5.22468	4.72116e-31	1.70712e-29		2.08956
orf19.6842	C1_04480C_A	TUS1	1.0621	3.40258	1.54106e-15	1.39539e-14		2.08797
orf19.6660	C5_03510C_A		1.0616	4.12466	2.80854e-21	4.61886e-20		2.08725
orf19.2841	CR_02820W_A	PGM2	1.06008	2.55411	2.39694e-09	1.15714e-08		2.08504
orf19.7321	CR_09230C_A		1.05814	4.18834	8.33494e-23	1.55852e-21		2.08224
orf19.1814	CR_07090W_A	STT4	1.05812	4.8936	5.19308e-27	1.41771e-25		2.08221
orf19.1943	C5_01260W_A		1.05643	0.537697	0.00270186	0.00564784		2.07978
orf19.5130	C7_03250C_A	PDI1	1.05626	8.98499	1.06502e-73	1.66143e-71		2.07953
orf19.7331	CR_09360W_A	FCY24	1.05261	0.302257	0.00451145	0.0089867		2.07428
orf19.505	CR_04190W_A	SRV2	1.05105	5.9762	2.72674e-54	2.61193e-52		2.07204
orf19.1254	C4_05690W_A	SEC23	1.05026	7.39602	1.2127e-60	1.37945e-58		2.0709
orf19.7362	C3_05810C_A	SKN1	1.04926	2.05617	1.01163e-07	4.09754e-07		2.06947
orf19.5830	C2_02760W_A	LHS1	1.04884	6.994	2.00997e-56	2.15185e-54		2.06887
orf19.448	C1_05170C_A	CUE5	1.04804	5.72103	4.18715e-44	2.68963e-42		2.06772
orf19.6257	C1_06550W_A	GLT1	1.04643	10.3776	1.68231e-76	2.96304e-74		2.06541
orf19.4970	C1_13430C_A		1.04509	0.191125	0.0075332	0.0143315		2.06349
orf19.1570	C2_02460W_A	ERG7	1.04252	5.42096	6.61775e-35	3.14199e-33		2.05983
orf19.6114			1.04236	4.79381	2.58547e-25	6.08478e-24		2.05959
orf19.5514	C6_02450W_A		1.03886	0.599693	0.00115439	0.00256636		2.05461
orf19.6007	C3_05280C_A		1.03813	5.63576	7.01897e-33	2.92737e-31		2.05356
orf19.4812	C1_09480W_A	PPT2	1.03498	2.55753	7.75779e-10	3.95495e-09		2.04909
orf19.94	C6_00930C_A		1.0344	2.40433	3.9246e-09	1.86171e-08		2.04826
orf19.7437	C3_06490W_A		1.03416	2.5186	2.60035e-09	1.25202e-08		2.04792
orf19.1653	C3_01950C_A		1.03137	3.15917	1.33898e-12	8.97033e-12		2.04396
orf19.347	C3_03490W_A	RSN1	1.02678	1.75495	1.38765e-05	4.22562e-05		2.03747
orf19.2210	C2_07720C_A		1.02614	4.15838	3.31925e-18	3.85598e-17		2.03656
orf19.6951	C3_03680W_A		1.02255	2.73746	2.96413e-11	1.76298e-10		2.0315
orf19.2064	C2_00640W_A		1.02239	3.44306	2.0497e-13	1.5022e-12		2.03129
orf19.4584	C4_02070W_A	PHO114	1.02079	0.704918	0.00113491	0.00253025		2.02902
orf19.1338	C7_03370C_A		1.02019	3.76199	4.15491e-17	4.45694e-16		2.02819
orf19.4044	C5_05450C_A	MUM2	1.0194	3.16331	3.14784e-13	2.24669e-12		2.02708
orf19.1034	C1_03750W_A		1.01754	1.91892	7.53843e-07	2.70432e-06		2.02447
orf19.5450	C3_00200C_A	ETR1	1.01415	3.84254	7.70986e-14	5.8711e-13		2.01971
orf19.290	C3_02960C_A	KRE5	1.0136	4.77202	6.3385e-27	1.70484e-25		2.01894
orf19.3710	CR_07810W_A	YHB5	1.01173	6.01211	1.47644e-32	5.75813e-31		2.01632
orf19.1585	C2_02590W_A	ZRT2	1.01054	5.27093	6.41735e-09	2.97443e-08		2.01467
orf19.6837	C1_04450C_A	FMA1	1.00956	3.29452	3.37271e-12	2.17671e-11		2.0133
orf19.164	CR_02570C_A		1.00773	3.85627	3.95585e-19	5.04649e-18		2.01075
orf19.2457	C1_05920W_A		1.00655	4.09617	2.72835e-15	2.42619e-14		2.0091
orf19.5249	C1_12150C_A		1.00342	0.455932	0.00415116	0.00833284		2.00475
orf19.7128	C7_04330C_A	SYS1	1.00068	3.79725	2.36776e-14	1.9238e-13		2.00095
orf19.20	C2_06420C_A	RTS1	1.00051	6.04167	3.25982e-43	1.99985e-41		2.00071
orf19.5102	C1_08230C_A	PLB5	0.999947	2.31111	7.51859e-08	3.09123e-07		1.99993
orf19.1345	C7_03300C_A	LIP8	0.998158	2.66076	1.16468e-08	5.22955e-08		1.99745
orf19.5133	C7_03220C_A	ZCF29	0.99765	7.48104	3.29877e-54	3.1054e-52		1.99675
orf19.2020	C2_01020W_A	HGT6	0.992907	9.02938	5.90743e-33	2.53973e-31		1.99019
orf19.6492	C7_02220C_A		0.992679	1.40864	2.81672e-05	8.21982e-05		1.98988
orf19.4056	C1_05140W_A	BRG1	0.99163	8.51334	1.72883e-44	1.13728e-42		1.98843
orf19.6724	C3_07640C_A	FUM12	0.991434	7.98502	1.84524e-52	1.70763e-50		1.98816
orf19.5257	C1_12080W_A	LCB4	0.988102	3.35744	1.23379e-12	8.32697e-12		1.98357
orf19.1738	CR_04660C_A	UGP1	0.98711	6.24028	2.72818e-45	1.86198e-43		1.98221
orf19.5275	C1_11920W_A		0.985762	1.94906	4.19747e-06	1.37564e-05		1.98036
orf19.3659	C6_00700C_A		0.984788	2.58418	6.57715e-10	3.36878e-09		1.97902
orf19.8	CR_07110C_A		0.98342	1.24681	0.000367671	0.000896999		1.97715
orf19.3537	C2_05060C_A		0.982957	5.91705	1.3604e-17	1.51587e-16		1.97651
orf19.4754	C1_08980C_A	ZWF1	0.980555	4.66285	1.93117e-16	1.90329e-15		1.97322
orf19.4549	C1_01760W_A	FGR38	0.978456	3.1652	3.63691e-12	2.33618e-11		1.97036
orf19.5041	C4_03860C_A		0.977087	2.53626	7.60396e-08	3.12398e-07		1.96849
orf19.2013	C2_01120W_A	KAR2	0.971376	10.4181	1.50805e-55	1.52481e-53		1.96071
orf19.1995	C2_01300C_A	MNN24	0.967199	3.34177	1.39541e-14	1.17214e-13		1.95504
orf19.994	C1_10510W_A		0.966551	2.4926	2.81922e-09	1.35145e-08		1.95416
orf19.6947	C3_03720W_A	GTT11	0.964236	5.72603	6.8802e-26	1.69216e-24		1.95103
orf19.135	C6_01280W_A	EXO84	0.963471	3.81158	9.0411e-17	9.31404e-16		1.95
orf19.5395	C3_00630W_A		0.963279	4.20157	6.59569e-13	4.55278e-12		1.94974
orf19.1926	C5_01400W_A	SEF2	0.962872	5.63461	1.46063e-26	3.87139e-25		1.94919
orf19.1628	C3_02170C_A	LAP41	0.961792	3.15471	5.45973e-11	3.13791e-10		1.94773
orf19.5338	C2_10590W_A	GAL4	0.961536	6.16593	6.76972e-35	3.18644e-33		1.94738
orf19.5248	C1_12160W_A	MSO1	0.960817	3.82745	1.76868e-13	1.30324e-12		1.94641
orf19.6440	CR_08650C_A		0.960687	4.52074	2.20109e-20	3.19626e-19		1.94624
orf19.1946	C5_01230C_A		0.96012	3.68656	1.54926e-12	1.02937e-11		1.94547
orf19.4530.1	C1_01930W_A		0.957113	2.39072	3.48666e-07	1.30879e-06		1.94142
orf19.6387	CR_08250C_A	HSP104	0.956949	3.67052	4.15302e-15	3.65145e-14		1.9412
orf19.7313	CR_09170C_A	SSU1	0.955468	5.88903	9.79037e-35	4.49205e-33		1.93921
orf19.1367	C2_09840W_A	MTW1	0.955403	0.510883	0.00336192	0.00688044		1.93912
orf19.2474	C1_05770C_A	PRC3	0.952178	3.26328	2.84823e-11	1.69774e-10		1.93479
orf19.3806	C4_04750W_A		0.951624	3.59571	2.23975e-13	1.63054e-12		1.93405
orf19.7038	C7_00790W_A		0.950534	2.20302	2.24106e-07	8.67813e-07		1.93259
orf19.5179	C7_02830C_A	LIP5	0.950111	2.07382	2.77698e-06	9.34214e-06		1.93202
orf19.4055	C5_05510C_A		0.942507	1.41463	5.1278e-05	0.000143505		1.92187
orf19.2351	C1_10700C_A	NIT3	0.942182	2.35975	5.67864e-08	2.36682e-07		1.92143
orf19.5422	C3_00440W_A		0.940482	0.825033	0.00160867	0.00348961		1.91917
orf19.3919.1	C5_04330W_A		0.940212	3.33975	2.59608e-13	1.87e-12		1.91881
orf19.4702	C4_00920C_A		0.939338	0.915238	0.00100833	0.00227687		1.91765
orf19.395	C1_08500C_A	ENO1	0.939184	7.77069	2.70703e-09	1.30109e-08		1.91744
orf19.3074	C4_07250C_A	TLO10	0.936233	4.27469	8.8654e-17	9.1503e-16		1.91353
orf19.6773	C3_07260C_A	ECM29	0.933938	4.61063	3.09511e-18	3.60327e-17		1.91048
orf19.459	CR_05950C_A	ADP1	0.933803	4.00933	4.03594e-14	3.17525e-13		1.9103
orf19.7323	CR_09270C_A	CBP1	0.932913	4.2647	1.02833e-17	1.16729e-16		1.90913
orf19.3180	C5_01920C_A		0.931621	2.23627	2.27268e-07	8.76834e-07		1.90742
orf19.3302			0.929544	2.347	6.63556e-07	2.40412e-06		1.90467
orf19.2184	C2_07980W_A		0.928028	4.15327	1.60966e-18	1.94442e-17		1.90267
orf19.4395	CR_03520C_A		0.926956	5.31546	9.39966e-24	1.88684e-22		1.90126
orf19.5308	C4_04020C_A		0.925081	0.681379	0.00353785	0.0072104		1.89879
orf19.5445	C3_00240C_A	GLO3	0.924311	7.7346	4.26022e-41	2.50116e-39		1.89778
orf19.4043	C5_05440C_A		0.923427	5.2998	4.89129e-29	1.54373e-27		1.89662
orf19.4786	C1_09270W_A	FGR43	0.922794	0.904334	0.00127454	0.00281398		1.89578
orf19.92	C6_00910C_A		0.922642	7.1028	2.22993e-48	1.66786e-46		1.89558
orf19.5980	C3_05090C_A		0.920206	1.09797	0.000569566	0.00134218		1.89238
orf19.4054	C5_05500C_A	CTA24	0.919888	4.53135	2.33217e-13	1.69105e-12		1.89197
orf19.1042	C1_04100C_A	POR1	0.917232	8.64204	5.32321e-40	3.05945e-38		1.88849
orf19.909	C2_03220C_A	STP4	0.91683	4.69353	3.73217e-14	2.94901e-13		1.88796
orf19.2808	C3_04020C_A	ZCF16	0.915746	1.52134	6.20224e-05	0.000170429		1.88654
orf19.7229	C1_14210C_A	IML2	0.915295	5.5725	1.96751e-26	5.14e-25		1.88596
orf19.6196	C1_07080W_A		0.914909	0.126195	0.0181478	0.03183		1.88545
orf19.3051	C1_03490W_A		0.913887	5.19235	1.48892e-24	3.21324e-23		1.88411
orf19.316	C3_03170W_A	SEC13	0.913318	6.49004	1.03536e-32	4.15665e-31		1.88337
orf19.6500	C7_02150C_A	ECM42	0.909486	2.43044	9.39956e-07	3.33474e-06		1.87838
orf19.6038			0.903582	2.08239	4.82551e-06	1.56549e-05		1.8707
orf19.5285	CR_05390W_A	PST3	0.90325	5.64173	2.34053e-27	6.55347e-26		1.87027
orf19.4657	C4_01300W_A		0.902201	7.03543	1.53673e-43	9.64431e-42		1.86892
orf19.6556	C7_01680C_A		0.901484	5.57896	1.81264e-19	2.43768e-18		1.86799
orf19.4590	C4_02030W_A	RFX2	0.898931	3.37842	2.37079e-12	1.54654e-11		1.86468
orf19.5211	C2_05890C_A	IDP1	0.898442	4.79434	1.50282e-16	1.50835e-15		1.86405
orf19.7218	C1_14120C_A	RBE1	0.896785	3.12352	8.4731e-09	3.87788e-08		1.86191
orf19.4699	C4_00950C_A		0.895057	2.25426	6.70382e-07	2.4257e-06		1.85968
orf19.1777	C2_10050W_A		0.894179	4.36919	1.0642e-19	1.47102e-18		1.85855
orf19.886	C2_03380W_A	PAN1	0.893686	8.07268	5.88918e-42	3.53351e-40		1.85792
orf19.2241	C2_06870C_A	PST1	0.893362	1.0275	0.00139209	0.00305009		1.8575
orf19.3047	C1_03450C_A		0.893316	4.27652	2.88844e-18	3.37706e-17		1.85744
orf19.5816	C2_02880C_A	EBP7	0.893164	1.23114	0.000291314	0.000719553		1.85725
orf19.744	C4_05140C_A	GDB1	0.890827	3.34585	1.83259e-10	1.00059e-09		1.85424
orf19.416	C1_05480C_A		0.889633	0.76056	0.00328085	0.00674003		1.8527
orf19.3459	C6_02190C_A		0.888179	3.41551	7.7348e-11	4.38547e-10		1.85084
orf19.1325	C4_03540C_A	ECM38	0.88789	0.387738	0.0136445	0.0246685		1.85047
orf19.6353	C1_12700W_A		0.884485	1.62562	0.000131787	0.000344287		1.8461
orf19.2370	CR_06940W_A	DSL1	0.884102	1.50434	0.000125943	0.000329966		1.84562
orf19.4082	C2_09220W_A	DDR48	0.883722	3.5005	8.12872e-13	5.57573e-12		1.84513
orf19.3086	C4_07190W_A	SEC10	0.881525	6.40082	1.56994e-30	5.53024e-29		1.84232
orf19.4309	C5_02860C_A	GRP2	0.879773	2.66498	9.07303e-08	3.71077e-07		1.84009
orf19.5618	C6_03300C_A		0.879665	3.18433	8.02029e-11	4.54261e-10		1.83995
orf19.7444	C3_06550C_A		0.877654	0.844004	0.00332157	0.00681027		1.83738
orf19.33	C2_06570C_A		0.877378	6.55101	5.33881e-15	4.64171e-14		1.83703
orf19.7279	CR_08840C_A	NIT2	0.876896	0.430413	0.0171034	0.030163		1.83642
orf19.2602	CR_02020C_A	OPT1	0.876729	2.48346	9.20763e-08	3.75737e-07		1.83621
orf19.5965	C3_04970C_A		0.876263	4.46752	1.16694e-16	1.18209e-15		1.83561
orf19.5815	C2_02890W_A	SCT2	0.876047	2.56672	2.27399e-07	8.76834e-07		1.83534
orf19.4551			0.875526	1.69428	0.000493636	0.00117903		1.83468
orf19.882	C2_03390C_A	HSP78	0.874056	5.20862	1.46189e-21	2.50883e-20		1.83281
orf19.6160	C3_00850C_A		0.873643	6.0501	1.43578e-37	7.32651e-36		1.83228
orf19.2844	CR_02870W_A	APL4	0.873562	4.22259	1.628e-17	1.79212e-16		1.83218
orf19.2131	C6_04470C_A		0.870714	5.2388	1.42436e-22	2.61851e-21		1.82857
orf19.6112			0.87027	5.29932	5.72778e-13	3.98391e-12		1.828
orf19.2613	CR_02130W_A	ECM4	0.869362	3.01641	6.08659e-09	2.82352e-08		1.82686
orf19.5495	C2_06320W_A		0.869334	6.59842	2.37554e-38	1.2842e-36		1.82682
orf19.6249	C1_06610C_A	HAK1	0.869296	2.91051	2.20027e-09	1.06881e-08		1.82677
orf19.203	C2_09010W_A	STB3	0.868555	3.34845	4.31863e-10	2.24998e-09		1.82583
orf19.1368	C2_09820W_A		0.865044	0.896059	0.00204011	0.00434439		1.82139
orf19.3360			0.864283	4.52758	4.25307e-20	6.06312e-19		1.82043
orf19.5752	C6_03780C_A		0.862769	2.87925	1.08041e-05	3.34222e-05		1.81853
orf19.3872	CR_06170W_A		0.861972	1.58759	0.000669304	0.00155771		1.81752
orf19.861	C2_03590C_A	CAP4	0.86148	2.59457	4.08394e-07	1.51896e-06		1.8169
orf19.2958	C1_02680C_A		0.858157	1.65679	0.000231526	0.000580676		1.81272
orf19.5370	C2_10870W_A		0.855257	3.89399	9.23806e-12	5.71232e-11		1.80908
orf19.2670	C4_03200C_A		0.854796	2.14801	1.9805e-05	5.90905e-05		1.8085
orf19.5821	C2_02840C_A		0.854147	3.00818	7.42206e-09	3.41978e-08		1.80769
orf19.7421	C3_06360C_A	CYP5	0.853949	7.14392	1.14079e-32	4.48107e-31		1.80744
orf19.2568	CR_01730W_A	IFU5	0.853944	4.64832	1.69643e-20	2.51016e-19		1.80744
orf19.2467	C1_05840W_A	PRN1	0.853007	4.07415	4.12824e-10	2.16524e-09		1.80626
orf19.3658	C6_00710W_A		0.852961	2.26049	7.84498e-07	2.80508e-06		1.8062
orf19.6640	CR_05720W_A	TPS1	0.850687	3.35971	1.27553e-09	6.33705e-09		1.80336
orf19.807	C2_04140W_A	CHS5	0.850024	6.31288	6.22886e-33	2.6364e-31		1.80253
orf19.3557	C2_05280C_A	GPI19	0.846394	1.47719	0.000221604	0.000557841		1.798
orf19.1161	C1_11590W_A	PLD1	0.844206	6.73099	2.7415e-33	1.19749e-31		1.79528
orf19.3852	CR_06030C_A		0.84353	1.29249	0.000570012	0.00134265		1.79444
orf19.3663.1	C1_02060W_A		0.842238	0.633984	0.0141282	0.0254839		1.79283
orf19.2662	C1_06190C_A		0.836318	5.60922	1.2874e-18	1.57253e-17		1.78549
orf19.201	C2_09030W_A		0.836045	1.35301	0.000475794	0.0011389		1.78515
orf19.4346	C5_03140C_A		0.833315	7.65139	1.9471e-39	1.07386e-37		1.78177
orf19.6988	C3_05530W_A	OST1	0.832843	5.23432	7.0868e-26	1.73515e-24		1.78119
orf19.6634	CR_05780W_A	VMA2	0.832635	7.78698	2.80042e-43	1.73753e-41		1.78093
orf19.7490	CR_00420W_A		0.83208	1.68502	0.000106762	0.000282013		1.78025
orf19.1275	C4_05880W_A	GAT1	0.831253	2.21402	4.08815e-05	0.000116439		1.77923
orf19.2046	C2_00780W_A	POT1-2	0.83074	0.659475	0.00978405	0.0182262		1.7786
orf19.7080	C7_00400W_A	LEU2	0.828193	3.21247	1.87446e-08	8.24703e-08		1.77546
orf19.3573	C2_05440W_A	PEX6	0.827229	2.6605	4.69925e-07	1.73716e-06		1.77427
orf19.732	CR_07170W_A		0.826664	2.42439	4.81162e-05	0.000135072		1.77358
orf19.4719	C4_06100W_A	CWH41	0.82602	4.92955	2.09386e-19	2.7884e-18		1.77279
orf19.6699	C7_03650W_A		0.825793	3.10976	2.37384e-08	1.03524e-07		1.77251
orf19.1391	C2_09630C_A		0.825214	1.13259	0.00564569	0.0109934		1.7718
orf19.7261	C1_14440C_A	GDI1	0.824864	7.72293	4.39911e-34	2.00159e-32		1.77137
orf19.2228	C2_06770W_A		0.824016	1.0127	0.00696589	0.0133358		1.77033
orf19.5940	C3_04770C_A	ZCF32	0.822914	3.23035	1.82129e-09	8.93462e-09		1.76898
orf19.1664	C3_01820W_A		0.822565	1.30132	0.000765972	0.00176019		1.76855
orf19.1210	C6_04110W_A		0.822446	4.61101	2.05141e-16	2.0109e-15		1.7684
orf19.2895	C4_06400C_A	VMA8	0.82224	4.9064	1.3244e-18	1.61412e-17		1.76815
orf19.6605	CR_09570W_A		0.822008	1.36708	0.000793254	0.00181982		1.76787
orf19.4597	C4_01950W_A		0.82073	4.72442	3.37892e-20	4.85497e-19		1.7663
orf19.2638	C5_03430W_A		0.819041	5.03478	2.08272e-20	3.03244e-19		1.76423
orf19.7342	CR_09470W_A	AXL1	0.817467	0.749227	0.00818371	0.0154881		1.76231
orf19.2078	C2_00490W_A		0.816749	4.79319	5.04111e-21	8.04809e-20		1.76143
orf19.7539.1	CR_00040C_A		0.815777	4.44868	2.25588e-12	1.47334e-11		1.76025
orf19.3734	CR_02350C_A	GEF2	0.814569	5.29708	1.94529e-14	1.59959e-13		1.75877
orf19.5171	C7_02890C_A	PMT1	0.814068	7.93041	6.33871e-44	4.02435e-42		1.75816
orf19.2312	C1_11020W_A		0.813776	3.44161	2.55667e-10	1.37531e-09		1.75781
orf19.2791	C1_07540C_A	BBC1	0.813454	4.88244	1.26418e-17	1.42318e-16		1.75741
orf19.6968	C3_05320W_A		0.813393	4.13096	1.39239e-12	9.31674e-12		1.75734
orf19.707	CR_06730W_A	APG7	0.8127	1.29361	0.00141392	0.00309172		1.7565
orf19.6684	C7_03520W_A	PNC1	0.812691	1.64125	0.000168478	0.000433093		1.75648
orf19.7436.1	C3_06480C_A	ECM15	0.812532	2.87994	6.56925e-07	2.38168e-06		1.75629
orf19.6796	C3_07040C_A	YSA1	0.8125	2.67543	0.000479409	0.00114605		1.75625
orf19.4570	C4_02200C_A		0.81238	0.300912	0.0223928	0.0384843		1.75611
orf19.7632	CR_10530W_A		0.810462	2.87843	3.25232e-08	1.39824e-07		1.75377
orf19.4174	C4_00680W_A		0.808667	4.31857	3.39839e-14	2.71672e-13		1.75159
orf19.3151	C2_06710W_A		0.808634	1.8748	0.00454198	0.00904091		1.75155
orf19.7537	CR_00070W_A	BNR1	0.806879	5.56286	1.88703e-20	2.77715e-19		1.74942
orf19.4577	C4_02150C_A		0.806476	0.207403	0.0315453	0.0524634		1.74893
orf19.1420	C4_04280C_A		0.80644	3.95653	1.64416e-10	9.0313e-10		1.74889
orf19.7043.1	C7_00750W_A	ACB1	0.805922	2.47043	7.61463e-06	2.4144e-05		1.74826
orf19.3519	CR_05490W_A	SUA72	0.804454	2.23043	5.41101e-06	1.74405e-05		1.74649
orf19.2531	CR_01470W_A	CSP37	0.801367	2.08477	1.19869e-05	3.69141e-05		1.74275
orf19.3507	C6_02040W_A	MCR1	0.80093	5.82223	2.09417e-12	1.37265e-11		1.74222
orf19.729.1	CR_07560W_A	RGD3	0.799998	4.56142	1.46537e-13	1.08561e-12		1.7411
orf19.89	C6_00880W_A	PEX7	0.799827	4.20393	1.98609e-14	1.62824e-13		1.74089
orf19.2341	C1_10780C_A	HNT1	0.799183	2.3977	1.80296e-06	6.19128e-06		1.74012
orf19.4573	C4_02180C_A	ZCF26	0.798989	1.28557	0.000903571	0.00205648		1.73988
orf19.6956	C3_03640W_A	DAL9	0.797718	2.72815	6.14262e-07	2.2389e-06		1.73835
orf19.5813	C2_02920W_A		0.797116	4.69475	8.38722e-16	7.8014e-15		1.73762
orf19.5796	C2_03050W_A	SHE9	0.796835	3.10031	1.3942e-08	6.21414e-08		1.73729
orf19.3823	C4_04580W_A	ZDS1	0.796728	7.94809	5.15401e-35	2.4685e-33		1.73716
orf19.2655	C5_03240W_A	BUB3	0.795908	3.03094	1.08443e-06	3.82739e-06		1.73617
orf19.2903	C4_06340W_A	AGO1	0.795497	4.37076	4.48608e-13	3.15238e-12		1.73567
orf19.1363	C2_09880C_A		0.79546	6.47279	6.57755e-26	1.63243e-24		1.73563
orf19.6202	C1_07030C_A	RBT4	0.795398	4.22758	3.08876e-14	2.48741e-13		1.73556
orf19.703	CR_06690C_A		0.794719	3.70204	1.92939e-12	1.27074e-11		1.73474
orf19.4594	C4_01980C_A	CLC1	0.794117	6.37125	9.85799e-28	2.84786e-26		1.73402
orf19.7130	C7_04320W_A		0.792613	0.823969	0.0053783	0.0105366		1.73221
orf19.130	C6_01190C_A	VPS15	0.792404	2.54421	1.51005e-06	5.24816e-06		1.73196
orf19.27	C2_06510W_A		0.792389	2.75184	5.13811e-06	1.66197e-05		1.73194
orf19.999	C1_10550C_A	GCA2	0.788325	1.1667	0.00182656	0.00392367		1.72707
orf19.1390	C2_09640W_A	PMI1	0.788183	5.8914	5.49113e-26	1.38804e-24		1.7269
orf19.7227	C1_14190C_A		0.787824	0.991025	0.00335173	0.0068645		1.72647
orf19.4828	C1_09650W_A		0.787204	1.88169	0.00476715	0.00945807		1.72573
orf19.1372	C2_09780C_A		0.785836	6.1677	1.07219e-29	3.48462e-28		1.72409
orf19.4253	C5_02450W_A		0.785564	3.03513	1.25452e-07	4.99613e-07		1.72377
orf19.4290	C5_02710W_A	TRR1	0.785478	10.6896	1.06339e-28	3.31776e-27		1.72366
orf19.1699	C3_01500C_A	BZZ1	0.784878	4.01536	1.6352e-11	9.97565e-11		1.72295
orf19.4433	C1_07370C_A	CPH1	0.78375	4.38684	2.39176e-13	1.72738e-12		1.7216
orf19.1796	C4_05390W_A		0.78369	1.1319	0.00301519	0.00624069		1.72153
orf19.5615	C6_03270C_A	AYR2	0.779659	0.905932	0.00560413	0.0109242		1.71673
orf19.4829	C1_09660W_A	DOA1	0.777398	4.89831	8.24401e-17	8.54123e-16		1.71404
orf19.2685	C4_03070W_A	PGA54	0.776937	6.98692	8.88515e-25	1.95617e-23		1.71349
orf19.2165	C2_08200W_A		0.776395	6.76662	1.82199e-21	3.06095e-20		1.71285
orf19.7527	CR_00110W_A		0.774776	4.8448	9.49883e-17	9.73051e-16		1.71092
orf19.1638	C3_02080W_A		0.771786	3.69545	7.77199e-09	3.57498e-08		1.70738
orf19.334	C3_03370C_A		0.771084	3.82357	2.82324e-08	1.22212e-07		1.70655
orf19.894	C2_03340W_A		0.770859	3.90421	2.35734e-11	1.4113e-10		1.70629
orf19.7201	C7_03810W_A	SLA2	0.77008	5.11594	1.73046e-16	1.721e-15		1.70536
orf19.903	C2_03270W_A	GPM1	0.769852	7.41288	9.02065e-20	1.25007e-18		1.70509
orf19.4157	C4_00830W_A	SPS20	0.769694	1.95321	0.00377349	0.00764215		1.70491
orf19.7214	C1_14060W_A		0.767837	2.21998	0.000122704	0.000322098		1.70272
orf19.457	CR_05980W_A		0.764699	4.98134	5.67971e-17	5.9983e-16		1.69901
orf19.543	CR_04530W_A	FUM11	0.76427	4.80029	9.00448e-15	7.69306e-14		1.69851
orf19.3705	CR_07770C_A	PTC6	0.763876	3.32199	2.84495e-07	1.08096e-06		1.69805
orf19.5506	C7_03710C_A	PLC1	0.763324	3.2226	2.82475e-08	1.22212e-07		1.6974
orf19.85	C6_00840W_A	GPX2	0.763286	4.95971	0.000176089	0.000451808		1.69735
orf19.6217	C1_06930W_A	PGA63	0.76225	8.55783	6.18979e-33	2.6364e-31		1.69613
orf19.69	C1_12470W_A		0.762243	0.301023	0.0419613	0.0676836		1.69613
orf19.2289	C2_07320W_A	ARP3	0.760202	6.29641	3.70383e-28	1.09907e-26		1.69373
orf19.2825	CR_02650C_A	DRE2	0.75991	8.00873	1.80481e-31	6.71868e-30		1.69338
orf19.3764	C1_12520W_A	GSG1	0.759537	3.52157	9.01693e-11	5.04948e-10		1.69295
orf19.4747	C1_08880W_A	HEM14	0.757859	5.07254	8.90757e-11	4.99336e-10		1.69098
orf19.2166	C2_08190W_A	VMA5	0.757766	3.3464	2.3335e-05	6.89443e-05		1.69087
orf19.5897	C3_04460W_A		0.756488	5.05988	3.77241e-18	4.35462e-17		1.68937
orf19.2007	C2_01170C_A		0.755541	5.30527	1.13685e-18	1.40118e-17		1.68826
orf19.6573	C7_01550W_A	BEM2	0.755253	8.48433	6.35889e-40	3.61662e-38		1.68793
orf19.410.3	C1_05560W_A	RIB4	0.755009	3.93117	1.40294e-12	9.37585e-12		1.68764
orf19.2587	CR_01900C_A	HNM3	0.754991	1.86565	0.00272966	0.00569941		1.68762
orf19.5731	C6_03630W_A	PAD1	0.75467	1.31753	0.00468038	0.00930284		1.68725
orf19.5114	C1_08340C_A		0.754174	2.05256	0.000451524	0.00108461		1.68667
orf19.1234	C4_05530W_A	FGR6-10	0.754115	0.682901	0.0209498	0.0362325		1.6866
orf19.2769	C4_02340W_A		0.752816	1.76791	0.00164342	0.00355934		1.68508
orf19.3944	C5_04600C_A	GRR1	0.752525	6.13471	1.31186e-27	3.76986e-26		1.68474
orf19.7061	C7_00580C_A		0.75051	1.11714	0.00570942	0.0111017		1.68239
orf19.6327	C6_00100C_A	HET1	0.750412	8.04981	2.18463e-24	4.58772e-23		1.68227
orf19.3443	C6_01410C_A	OYE2	0.750035	4.46848	1.88745e-14	1.55672e-13		1.68183
orf19.5921	C3_04630W_A		0.748902	3.12354	3.22163e-08	1.38614e-07		1.68051
orf19.524	CR_04350C_A		0.747554	1.45756	0.00142676	0.00311728		1.67894
orf19.4181	C4_00620C_A	SPC2	0.747527	3.49014	3.27172e-10	1.73097e-09		1.67891
orf19.5029	C1_13910C_A	MODF	0.746986	1.79154	0.000288663	0.000713813		1.67828
orf19.6941	C3_03760W_A		0.746879	3.04399	2.83756e-07	1.0789e-06		1.67816
orf19.5622	C6_03340C_A	GLC3	0.7455	2.46469	1.15475e-05	3.56614e-05		1.67656
orf19.3245	CR_01090W_A		0.744306	2.47745	7.51451e-06	2.38542e-05		1.67517
orf19.6184	C3_07880C_A		0.743709	3.72175	4.32781e-09	2.04057e-08		1.67448
orf19.806	C2_04150C_A	VMA7	0.742502	3.278	3.42463e-08	1.4677e-07		1.67307
orf19.1290	C4_05300W_A	XKS1	0.738965	2.48749	6.69679e-06	2.13453e-05		1.66898
orf19.3919	C5_04320C_A		0.73888	3.87744	6.67274e-11	3.80702e-10		1.66888
orf19.7500	CR_00330C_A	PXA1	0.736259	3.24766	1.33681e-06	4.68483e-06		1.66585
orf19.223	C2_08860W_A		0.73553	5.67196	1.21076e-22	2.24856e-21		1.66501
orf19.6055			0.733924	4.18088	3.51483e-13	2.49234e-12		1.66316
orf19.7149	C7_04240C_A		0.732991	5.27933	1.83855e-17	2.01173e-16		1.66208
orf19.6414.3	CR_08460W_A	TPM2	0.731501	7.81873	1.07942e-28	3.34865e-27		1.66037
orf19.3259	CR_00990W_A		0.73113	2.25978	5.94945e-05	0.000164309		1.65994
orf19.1461	C2_01540W_A		0.729601	0.417026	0.036024	0.0588896		1.65818
orf19.6673	C5_03610W_A	HEX1	0.729304	7.09389	1.95008e-27	5.51682e-26		1.65784
orf19.4893	C1_10230C_A		0.728429	4.45611	8.05869e-14	6.11967e-13		1.65683
orf19.3233	CR_01210C_A	HSE1	0.728368	4.52005	2.41599e-13	1.74257e-12		1.65676
orf19.2990	C1_02990C_A	XOG1	0.728269	2.31106	1.37933e-05	4.20265e-05		1.65665
orf19.5076.1	C1_08040W_A		0.72808	1.46366	0.00203607	0.00433747		1.65643
orf19.3769	C4_05080C_A		0.727624	3.86717	7.81729e-07	2.79701e-06		1.65591
orf19.7032	C7_00850W_A		0.726952	2.14467	4.27728e-05	0.000121382		1.65514
orf19.3661			0.725125	4.27615	7.37901e-14	5.63488e-13		1.65304
orf19.730	CR_07190W_A		0.723358	4.95391	3.31668e-14	2.65919e-13		1.65102
orf19.4979	C1_13470W_A	KNS1	0.723168	2.5952	3.43264e-06	1.13658e-05		1.6508
orf19.2190	C2_07930C_A	VRP1	0.723098	4.2371	1.60866e-10	8.8452e-10		1.65072
orf19.1474	C2_01640W_A	SLA1	0.722493	6.9483	5.39756e-25	1.22795e-23		1.65003
orf19.2693	C4_02990C_A	GST2	0.722063	2.20568	0.000883704	0.00201378		1.64954
orf19.4991	C1_13570W_A	MPT5	0.71958	4.94312	4.5699e-12	2.91151e-11		1.6467
orf19.1760	C2_10210C_A	RAS1	0.719473	7.63832	4.95936e-30	1.6511e-28		1.64658
orf19.940	C5_00490C_A	BUD2	0.719084	4.13288	1.59537e-11	9.74351e-11		1.64614
orf19.3656	C6_00720C_A	COX15	0.717734	8.7984	9.50245e-35	4.3969e-33		1.6446
orf19.6928	C3_03870C_A	SAP9	0.717389	5.6665	1.16886e-18	1.43738e-17		1.6442
orf19.3794	C4_04850C_A	CSR1	0.713243	5.50626	1.02749e-13	7.73809e-13		1.63948
orf19.3065	C1_03670C_A	DAO1	0.71178	4.01422	1.51048e-09	7.42995e-09		1.63782
orf19.3149	C2_06730W_A	LSP1	0.711571	5.30594	8.95561e-19	1.11384e-17		1.63759
orf19.6637	CR_05750W_A		0.710484	2.01885	0.00126472	0.00279344		1.63635
orf19.4341	C5_03120W_A		0.709268	3.64333	3.43276e-10	1.81091e-09		1.63497
orf19.5194.1	C1_04430C_A		0.708798	3.50166	3.61476e-07	1.35461e-06		1.63444
orf19.6703	C7_03680W_A		0.708772	2.07733	0.000147551	0.000382539		1.63441
orf19.5345	C2_10670W_A		0.707607	6.59151	2.63342e-25	6.17103e-24		1.63309
orf19.6528	C7_01930C_A		0.70717	3.88322	4.85083e-11	2.82061e-10		1.6326
orf19.953.1	C5_00370W_A	COF1	0.706961	6.24263	4.07841e-25	9.47581e-24		1.63236
orf19.6880	C2_05680W_A	COG4	0.705992	3.7436	2.28582e-10	1.23693e-09		1.63127
orf19.371	C4_00050W_A		0.704966	3.84413	3.38844e-07	1.27592e-06		1.63011
orf19.467	CR_03890W_A	WOR3	0.703423	7.65572	1.6597e-24	3.53982e-23		1.62836
orf19.1567	C2_02440W_A		0.702414	4.26065	5.93081e-12	3.73067e-11		1.62723
orf19.2297	C1_11190W_A	ARL3	0.702309	5.63196	2.07882e-21	3.47106e-20		1.62711
orf19.6753	C3_07380W_A		0.702235	3.90403	2.86427e-10	1.53022e-09		1.62702
orf19.3592	C2_08790W_A	JEM1	0.70114	4.74854	1.30673e-13	9.76026e-13		1.62579
orf19.5030	C1_13920W_A	DOS2	0.70101	3.77146	1.79046e-08	7.89656e-08		1.62564
orf19.3728	CR_02390W_A		0.700839	5.821	3.77373e-22	6.80018e-21		1.62545
orf19.4119	C2_06010W_A	SPO72	0.698496	4.18817	1.10256e-09	5.52798e-09		1.62281
orf19.2615	CR_02150W_A	MDL1	0.698286	5.15801	1.44472e-17	1.60329e-16		1.62258
orf19.7292	CR_08950W_A	ARP2	0.697713	6.34788	4.93167e-25	1.12665e-23		1.62193
orf19.4235	C5_02290W_A	PDE1	0.697445	2.3268	5.70226e-05	0.000158042		1.62163
orf19.4127	C2_04850C_A		0.697411	3.88736	1.38204e-09	6.82274e-09		1.62159
orf19.6705	C7_03480W_A		0.696579	8.12249	3.80787e-29	1.20878e-27		1.62066
orf19.6048			0.693346	2.59593	8.9271e-06	2.80772e-05		1.61703
orf19.4842	C1_09770W_A		0.692013	1.25304	0.01985	0.0345162		1.61554
orf19.5210	C2_05860C_A		0.691793	1.15693	0.0238606	0.0407503		1.61529
orf19.5392	C3_00650W_A	NGT1	0.690073	10.3616	8.43859e-35	3.93801e-33		1.61336
orf19.6003	C3_05250C_A		0.689476	3.39745	1.51573e-08	6.7448e-08		1.6127
orf19.6540	C7_01800C_A	PFK2	0.689406	7.42695	6.13269e-11	3.5099e-10		1.61262
orf19.7458	C3_06690C_A		0.688532	1.47574	0.00304474	0.00629947		1.61164
orf19.6517	C7_02020W_A	RAD14	0.688385	3.16455	6.51565e-06	2.078e-05		1.61148
orf19.296	C3_03000W_A		0.688192	0.693481	0.0253008	0.0429949		1.61126
orf19.6638	CR_05740C_A	PTC4	0.688074	1.89102	0.00287915	0.00597498		1.61113
orf19.1538	C2_02210C_A	TLG2	0.687917	3.57478	2.17946e-08	9.54278e-08		1.61096
orf19.307	C3_03100C_A		0.687153	5.8305	1.01344e-20	1.53279e-19		1.6101
orf19.6065			0.686916	4.80445	2.87713e-14	2.32728e-13		1.60984
orf19.3749	CR_02220C_A	OPT3	0.685367	2.31333	6.77426e-05	0.00018503		1.60811
orf19.5797	C2_03040W_A	PLC2	0.684114	2.16947	0.000631384	0.00147639		1.60671
orf19.4913	C1_12830C_A		0.682778	3.0372	1.83162e-06	6.27786e-06		1.60523
orf19.925	C5_00640C_A	SAM51	0.682268	4.88146	3.99848e-15	3.52693e-14		1.60466
orf19.1891	C2_07400C_A	43922	0.681399	5.17142	1.82947e-16	1.80632e-15		1.60369
orf19.3150	C2_06720W_A	GRE2	0.681085	0.572557	0.0419139	0.067627		1.60335
orf19.2939			0.679291	1.80906	0.027902	0.0469042		1.60135
orf19.7131	C7_04310C_A		0.679278	5.7769	7.68467e-17	7.99206e-16		1.60134
orf19.3394	C6_01880W_A		0.678705	3.3227	2.20064e-06	7.45841e-06		1.6007
orf19.6396	CR_08300C_A		0.677823	6.09728	2.64389e-19	3.48687e-18		1.59972
orf19.6313	CR_04800W_A	MNT4	0.677455	3.04722	2.49861e-07	9.58035e-07		1.59932
orf19.3166	C5_02050W_A		0.676679	5.39152	4.43e-17	4.73343e-16		1.59846
orf19.5995	C3_05190C_A	MCA1	0.676587	5.40178	5.08453e-16	4.84494e-15		1.59835
orf19.1462	C2_01550W_A	SMP2	0.676115	5.33334	6.07865e-16	5.74211e-15		1.59783
orf19.5941	C3_04780C_A		0.676052	5.75456	8.55688e-20	1.18882e-18		1.59776
orf19.586	C5_00830C_A	ERV46	0.675196	6.33473	6.05171e-26	1.51884e-24		1.59681
orf19.3225	CR_01290C_A	CWH43	0.673828	6.13682	7.94267e-21	1.22161e-19		1.5953
orf19.7644	CR_10610C_A		0.673399	1.75742	0.0060781	0.0117557		1.59483
orf19.3846	C4_04410C_A	LYS4	0.673284	7.63414	4.12451e-30	1.39875e-28		1.5947
orf19.6630	CR_05800C_A		0.672352	5.20898	4.10034e-15	3.61094e-14		1.59367
orf19.3516	CR_05450C_A		0.672165	3.19274	5.19089e-07	1.91114e-06		1.59346
orf19.1670	C3_01750C_A	BRO1	0.672107	4.04991	4.2488e-09	2.00853e-08		1.5934
orf19.5113	C1_08330C_A	ADH2	0.670251	2.42168	0.00241117	0.00507321		1.59135
orf19.1860.1	C2_07650C_A		0.668588	4.56496	8.81859e-12	5.46533e-11		1.58952
orf19.4737	C1_08790W_A	TPO3	0.66807	4.79398	3.8716e-12	2.48401e-11		1.58895
orf19.2350	C1_10710C_A		0.668028	0.417149	0.0500761	0.0790905		1.5889
orf19.5662	C4_00350W_A	PEP7	0.667975	3.57994	1.60748e-07	6.32795e-07		1.58884
orf19.7052	C7_00670C_A		0.666212	5.52835	1.40956e-17	1.56745e-16		1.5869
orf19.5949	C3_04830C_A	FAS2	0.664722	11.2253	8.52194e-33	3.49848e-31		1.58526
orf19.1107	C5_03870C_A		0.664554	3.25061	7.70959e-06	2.44308e-05		1.58508
orf19.1680	C3_01630W_A	TFP1	0.66454	7.21271	2.74586e-26	7.1054e-25		1.58506
orf19.5357	C2_10750C_A	AKL1	0.664292	6.02157	5.1264e-21	8.16039e-20		1.58479
orf19.4088	C2_09260C_A	GLO2	0.663809	5.33543	8.85623e-15	7.59106e-14		1.58426
orf19.3590	C2_08810C_A	IPP1	0.661483	8.70576	2.75604e-31	1.00993e-29		1.58171
orf19.2340	C1_10790W_A	CDC48	0.659343	7.9349	1.22337e-22	2.26428e-21		1.57936
orf19.3122	C4_06890W_A	ARR3	0.658888	4.46824	1.32599e-12	8.9032e-12		1.57887
orf19.6435	CR_08610W_A		0.658174	3.96774	1.79324e-06	6.16568e-06		1.57808
orf19.3994	C5_05020C_A		0.657954	4.95975	2.36573e-09	1.14511e-08		1.57784
orf19.4903	C1_10320W_A		0.657529	1.27615	0.00813211	0.0154032		1.57738
orf19.5147	C7_03080W_A	LMO1	0.656376	6.83462	1.68169e-20	2.49511e-19		1.57612
orf19.1392	C2_09620W_A		0.656231	5.09995	1.7969e-12	1.18635e-11		1.57596
orf19.351	C3_03530W_A		0.654487	0.373427	0.0712869	0.108088		1.57406
orf19.6868	C2_05560W_A		0.65374	2.40263	0.000546009	0.00129057		1.57324
orf19.5267	C1_11990W_A		0.653304	2.88031	0.000836822	0.00191414		1.57277
orf19.4952.1	C1_13260W_A		0.653036	4.1385	3.72079e-08	1.58467e-07		1.57247
orf19.4132	C5_01420W_A		0.652713	1.48955	0.00357116	0.00726743		1.57212
orf19.577	C5_00750C_A		0.65148	3.50252	1.13064e-07	4.54254e-07		1.57078
orf19.4412	C4_06020C_A		0.651181	3.79808	3.63587e-08	1.55214e-07		1.57045
orf19.7258	C1_14420W_A	DDI1	0.650694	6.42821	1.28448e-17	1.44305e-16		1.56992
orf19.837.1	C2_03840C_A	INO4	0.650313	1.50953	0.00515181	0.0101512		1.56951
orf19.3448	C6_01360W_A		0.650287	0.525649	0.0809159	0.121041		1.56948
orf19.6190	C3_07950C_A	SRB1	0.650221	9.64279	7.71252e-21	1.18956e-19		1.56941
orf19.5640	C4_00150C_A	PEX5	0.650145	5.53253	1.08483e-14	9.21179e-14		1.56933
orf19.3940	C5_04540C_A		0.649283	1.26267	0.0131852	0.0239094		1.56839
orf19.4147	C5_01520C_A	GLR1	0.648069	7.96499	1.70555e-20	2.51684e-19		1.56707
orf19.6671	C5_03590W_A	LAP4	0.64802	2.04584	0.00173438	0.00374001		1.56702
orf19.5409	C3_00540C_A	IST1	0.647263	1.6694	0.00161358	0.00349887		1.56619
orf19.4928	C1_12970C_A	SEC2	0.647133	4.85696	2.35327e-13	1.70409e-12		1.56605
orf19.3060	C1_03600W_A		0.646902	5.20325	6.49771e-14	5.01095e-13		1.5658
orf19.242	C3_02510C_A	SAP8	0.645794	0.647192	0.0293649	0.0491667		1.5646
orf19.1656	C3_01900C_A		0.644823	4.6727	1.7774e-08	7.85161e-08		1.56355
orf19.6971	C3_05340W_A	DIE2	0.644781	0.208695	0.0839619	0.124947		1.5635
orf19.3651	C6_00750C_A	PGK1	0.64421	6.6564	5.83983e-08	2.42844e-07		1.56288
orf19.1637	C3_02090C_A		0.642797	3.22147	1.79085e-05	5.36666e-05		1.56135
orf19.4269	C5_02560C_A		0.642723	1.45062	0.00619678	0.0119641		1.56127
orf19.1331	C7_03450C_A	HSM3	0.642083	0.33162	0.0892812	0.131739		1.56058
orf19.7668	CR_10790W_A	MAL2	0.639996	0.511385	0.0475976	0.0756353		1.55832
orf19.3893	C5_04110W_A	SCW11	0.639405	4.85065	1.09142e-11	6.71078e-11		1.55769
orf19.6747	C3_07430W_A		0.639339	6.18261	1.60887e-19	2.17436e-18		1.55762
orf19.3813	C4_04670C_A		0.639099	5.02112	5.42844e-14	4.22212e-13		1.55736
orf19.1513	C2_01990C_A	FAB1	0.637977	3.893	1.04597e-07	4.22411e-07		1.55615
orf19.1479	C2_01680C_A		0.637754	6.06816	7.66336e-18	8.73527e-17		1.5559
orf19.4608	C4_01850C_A	PDC12	0.637403	2.64933	0.000472918	0.00113301		1.55553
orf19.4579	C4_02120W_A	ERV29	0.636692	5.44195	1.19087e-09	5.94891e-09		1.55476
orf19.6627	CR_05860W_A		0.636688	2.68743	0.000179909	0.00045988		1.55476
orf19.687	C6_01960W_A		0.636092	3.83096	5.53952e-09	2.5807e-08		1.55411
orf19.537	CR_04460C_A		0.636012	2.49428	6.00958e-05	0.000165886		1.55403
orf19.645.1	CR_05080W_A	VMA13	0.635816	3.82472	1.10891e-07	4.46177e-07		1.55382
orf19.430	C1_05350W_A	YPT53	0.635213	2.95939	6.85136e-05	0.000186949		1.55317
orf19.5655	C4_00290C_A		0.635127	0.401903	0.0726767	0.109799		1.55307
orf19.6756	C3_07350W_A		0.634894	4.3349	1.6224e-09	7.97327e-09		1.55282
orf19.6877	C2_05660W_A	PNG2	0.633672	5.94304	6.55588e-16	6.16095e-15		1.55151
orf19.6420	CR_08510W_A	PGA13	0.630148	3.99453	2.05329e-07	7.98503e-07		1.54772
orf19.5007	C1_13700W_A	ACT1	0.628871	10.3259	1.05654e-29	3.45432e-28		1.54635
orf19.590	CR_08050C_A		0.628229	5.43464	6.87441e-14	5.28652e-13		1.54567
orf19.4869	C1_10020W_A	SFU1	0.626987	7.85377	1.00503e-21	1.74205e-20		1.54434
orf19.1421	C4_04270W_A		0.625867	1.0007	0.0364	0.0594447		1.54314
orf19.2178.1	C2_08060W_A		0.625452	0.670832	0.0522782	0.0822135		1.54269
orf19.5239	C1_12240C_A		0.623466	4.33851	7.52816e-10	3.84147e-09		1.54057
orf19.3156	C3_01180C_A		0.623038	3.86684	1.86734e-08	8.22232e-08		1.54011
orf19.6434	CR_08600C_A	PEX19	0.622924	5.80955	4.48781e-15	3.93264e-14		1.53999
orf19.3337			0.622206	2.20741	0.000897326	0.00204312		1.53923
orf19.7380	C3_05990C_A		0.620885	1.30846	0.0181476	0.03183		1.53782
orf19.7324	CR_09290W_A	THI13	0.619484	1.15801	0.0165475	0.0292866		1.53633
orf19.1149	C1_11700C_A	MRF1	0.619462	2.82967	9.45847e-06	2.9595e-05		1.5363
orf19.5076	C1_08030W_A	PFY1	0.619065	6.58887	1.21424e-13	9.13192e-13		1.53588
orf19.7247	C1_14340C_A	RIM101	0.618633	8.61665	3.13774e-24	6.48942e-23		1.53542
orf19.4861.1	C1_09940W_A		0.618246	0.934135	0.030388	0.0506931		1.53501
orf19.7212	C1_14040W_A		0.616797	5.32658	3.75148e-14	2.95998e-13		1.53347
orf19.5671	C4_00420C_A		0.616403	6.89384	2.97332e-23	5.79797e-22		1.53305
orf19.3409	C6_01760W_A	SEC12	0.616127	7.09373	1.8276e-19	2.45177e-18		1.53276
orf19.2247	C2_06930C_A		0.615971	5.98172	1.22241e-14	1.03158e-13		1.53259
orf19.1742	C2_10360C_A	HEM3	0.615892	7.87121	9.19172e-09	4.18921e-08		1.53251
orf19.2072	C2_00550W_A		0.615665	2.14585	0.000727139	0.0016773		1.53226
orf19.2936			0.614855	0.561148	0.0410969	0.0664463		1.5314
orf19.1162	C1_11580W_A		0.614847	4.63534	1.21215e-09	6.04968e-09		1.5314
orf19.2425	CR_03040C_A	HGT18	0.61477	1.99993	0.00301484	0.00624069		1.53131
orf19.3647	C6_00780W_A	SEC8	0.614747	5.31335	1.84557e-10	1.00668e-09		1.53129
orf19.7304	CR_09070C_A		0.61307	1.56486	0.0109837	0.0202263		1.52951
orf19.2277	C2_07210C_A	TPK2	0.611401	3.40734	3.39685e-06	1.12747e-05		1.52774
orf19.6596	CR_09670C_A		0.611326	3.35847	6.76421e-07	2.44425e-06		1.52766
orf19.3707	CR_07790C_A	YHB1	0.610648	10.0337	9.72475e-09	4.41006e-08		1.52694
orf19.649	CR_05030W_A		0.61045	5.22538	5.39105e-12	3.39898e-11		1.52674
orf19.4997	C1_13610C_A	KIS2	0.610009	4.77686	2.7321e-10	1.46391e-09		1.52627
orf19.1468	C2_01600C_A	CDC55	0.609928	6.32427	1.74356e-16	1.73041e-15		1.52618
orf19.5474	C3_00010C_A		0.608191	5.03806	3.39634e-12	2.18938e-11		1.52435
orf19.841	C2_03800C_A		0.608076	5.20235	1.95807e-10	1.06697e-09		1.52422
orf19.6729	C3_07610W_A	TIP120	0.607847	5.20971	2.74041e-13	1.97136e-12		1.52398
orf19.3881	CR_06290C_A		0.606524	3.14266	6.73088e-05	0.000183937		1.52259
orf19.5589	C6_03070C_A		0.605415	0.457152	0.0682918	0.104359		1.52142
orf19.2691	C4_03000C_A		0.6051	1.75112	0.00589254	0.0114292		1.52108
orf19.5197	C1_04400C_A	APE2	0.605052	6.99316	4.88548e-22	8.74581e-21		1.52103
orf19.74	C6_04170C_A	SEC5	0.604485	3.38256	6.89545e-06	2.19529e-05		1.52044
orf19.440	C1_05260C_A	SDH1	0.60377	4.35493	7.12847e-10	3.64774e-09		1.51968
orf19.3029			0.603103	1.7467	0.00447047	0.0089129		1.51898
orf19.4411	C4_06010C_A	HOS1	0.601401	1.92456	0.0017169	0.0037067		1.51719
orf19.1166	C1_11540C_A	CTA3	0.601354	6.94456	2.74186e-19	3.59869e-18		1.51714
orf19.4927	C1_12960C_A	BNI1	0.601174	6.73591	2.24849e-21	3.74291e-20		1.51695
orf19.931	C5_00580W_A		0.601044	1.26842	0.0187342	0.0327848		1.51681
orf19.5869	C3_04260W_A		0.601024	4.03574	1.53893e-07	6.0712e-07		1.51679
orf19.6403	CR_08350W_A		0.600964	5.60484	9.21125e-16	8.48118e-15		1.51673
orf19.1544	C2_02260W_A		0.600055	6.0637	2.16044e-13	1.5749e-12		1.51577
orf19.2914	C4_06240W_A		0.599951	3.05729	8.32414e-06	2.62868e-05		1.51567
orf19.1478	C2_01670C_A	STT3	0.599552	6.97986	7.08544e-23	1.34796e-21		1.51525
orf19.4722	C1_08640W_A	RTG1	0.599135	4.40066	3.50195e-10	1.84562e-09		1.51481
orf19.670.2	C1_11320C_A		0.598766	5.67639	1.11977e-15	1.02583e-14		1.51442
orf19.4515	C2_04390W_A		0.598232	0.00313272	0.169601	0.231911		1.51386
orf19.2988			0.596992	4.36966	5.12461e-06	1.65859e-05		1.51256
orf19.4682	C4_01070W_A	HGT17	0.59699	3.47936	0.00519441	0.010224		1.51256
orf19.5806	C2_02970C_A	ALD5	0.596528	8.19412	6.06769e-22	1.07215e-20		1.51207
orf19.3247	CR_01080W_A		0.596413	3.6814	1.19111e-06	4.18498e-06		1.51195
orf19.3318			0.59576	2.62134	0.000227112	0.00057013		1.51127
orf19.2743	C4_02570C_A		0.595648	2.44831	0.000706503	0.00163384		1.51115
orf19.1225	C2_06690C_A	PEX22	0.595208	2.62522	0.00117573	0.00260954		1.51069
orf19.3210	C5_04010C_A		0.594845	0.0917593	0.140176	0.195695		1.51031
orf19.2047	C2_00770W_A		0.594453	0.34535	0.137933	0.19294		1.5099
orf19.309	C3_03120C_A	DAL5	0.593313	1.54188	0.00816618	0.0154602		1.50871
orf19.3983	C5_04950C_A		0.593247	4.2579	2.25091e-05	6.67571e-05		1.50864
orf19.7586	CR_10110W_A	CHT3	0.593021	5.0373	6.87716e-09	3.17945e-08		1.5084
orf19.719	CR_06470W_A		0.592665	4.69172	1.8097e-10	9.89084e-10		1.50803
orf19.6192	C3_07980C_A		0.592228	3.42289	0.000665371	0.00154922		1.50757
orf19.7339	CR_09420C_A	BGL22	0.592201	2.83248	4.6797e-05	0.000131883		1.50754
orf19.1400	C2_09560C_A		0.59184	2.55417	0.000557082	0.0013156		1.50717
orf19.2867	C4_06650W_A		0.591548	4.85586	5.34936e-12	3.3805e-11		1.50686
orf19.6863	C4_05240C_A	VPH1	0.591408	6.75958	6.05196e-21	9.55021e-20		1.50672
orf19.1203.1	C6_00420W_A	DPM2	0.590886	3.2542	0.00515759	0.0101589		1.50617
orf19.1077	C6_04210C_A	ATM1	0.590717	2.87266	4.51021e-05	0.000127528		1.50599
orf19.1782	C2_10010C_A		0.589399	6.1857	7.94466e-17	8.24673e-16		1.50462
orf19.1721	C3_01300C_A	NCE103	0.588706	3.73349	6.11156e-05	0.000168269		1.5039
orf19.5968	C3_05000W_A	RDI1	0.588651	5.90798	7.87314e-16	7.33573e-15		1.50384
orf19.2599	CR_01980C_A	CRC1	0.588634	5.7304	2.94759e-16	2.85351e-15		1.50382
orf19.856	C2_03620W_A	IFK2	0.588417	2.58107	0.000175032	0.000449519		1.5036
orf19.2132	C6_04480C_A		0.588134	4.85458	6.52803e-08	2.70433e-07		1.5033
orf19.4031	C5_05360C_A		0.588024	4.55696	1.31461e-08	5.87861e-08		1.50319
orf19.789	C4_03940C_A	PYC2	0.587974	3.53048	8.04126e-07	2.8715e-06		1.50313
orf19.5901	C3_04470W_A	PKC1	0.58754	7.07669	6.03351e-22	1.06958e-20		1.50268
orf19.6151	CR_07210W_A	ARC15	0.585742	4.15383	2.24458e-06	7.6026e-06		1.50081
orf19.2107	C2_00260C_A	MUQ1	0.585235	3.70256	3.70372e-06	1.22263e-05		1.50028
orf19.1343	C7_03320C_A	MED16	0.5851	4.35167	7.90212e-09	3.62873e-08		1.50014
orf19.6550	C7_01750W_A		0.584834	3.20689	0.000305368	0.000752056		1.49987
orf19.388	C1_08430W_A	CAF16	0.584683	4.86898	2.89388e-10	1.54454e-09		1.49971
orf19.2301	C1_11150W_A		0.584496	3.74274	1.43397e-07	5.6859e-07		1.49952
orf19.3292			0.583994	3.85366	1.88788e-06	6.45449e-06		1.49899
orf19.1112	C5_03820C_A	BUD7	0.58374	4.55326	4.23332e-10	2.2161e-09		1.49873
orf19.3618	C2_08590W_A	YWP1	0.583324	6.2762	3.31618e-14	2.65919e-13		1.4983
orf19.4405	C4_05940W_A	PPS1	0.583243	1.30097	0.0146163	0.0262777		1.49821
orf19.206	C2_08990C_A		0.58303	5.83037	1.2183e-13	9.1498e-13		1.49799
orf19.1659	C3_01880W_A	ALG8	0.582805	3.23366	2.08901e-05	6.21581e-05		1.49776
orf19.2565	CR_01720W_A		0.58142	3.16729	0.000141562	0.000368062		1.49632
orf19.4114	C2_06070W_A	FAA2-1	0.580698	2.22817	0.00183335	0.00393634		1.49557
orf19.6191	C3_07970C_A	TLO8	0.580403	3.3948	0.00107739	0.00241188		1.49527
orf19.3496	C6_02120W_A	CHC1	0.580266	7.69932	3.25581e-12	2.10625e-11		1.49512
orf19.3815	C4_04660C_A		0.579551	5.03655	2.44055e-10	1.31674e-09		1.49438
orf19.4017	C5_05240C_A		0.579523	1.19208	0.0292852	0.0490482		1.49436
orf19.5689	C5_00080C_A		0.579092	6.9179	2.94875e-17	3.17558e-16		1.49391
orf19.6180	C3_07850W_A		0.579033	5.90686	5.97271e-11	3.42553e-10		1.49385
orf19.5730	C6_03620C_A		0.579005	2.96532	0.000237434	0.000594128		1.49382
orf19.1666	C3_01800C_A		0.578607	6.52014	5.43533e-16	5.15224e-15		1.49341
orf19.7466	CR_00640W_A	ACC1	0.57792	10.6282	1.66949e-24	3.54686e-23		1.4927
orf19.7060	C7_00590W_A		0.577841	1.73628	0.0134647	0.0243677		1.49261
orf19.2574	CR_01770C_A		0.577043	6.44313	1.53951e-16	1.53951e-15		1.49179
orf19.3267	CR_00870C_A		0.576674	2.18706	0.00167296	0.00362188		1.49141
orf19.1039	C1_04070C_A	BET4	0.576642	0.915638	0.0385605	0.0626422		1.49137
orf19.1350	C2_08330W_A		0.576499	5.47409	1.24496e-13	9.3372e-13		1.49123
orf19.759	C1_04830W_A	SEC21	0.575867	7.30054	8.90442e-21	1.35805e-19		1.49057
orf19.2124	C6_04410C_A		0.575526	4.16664	1.16505e-07	4.6683e-07		1.49022
orf19.1204	C6_00430C_A		0.575433	4.95635	5.20335e-11	3.00957e-10		1.49012
orf19.4378	CR_03800C_A	PPH3	0.575425	2.5517	0.000192313	0.000489525		1.49012
orf19.4003	C5_05110C_A	TIP20	0.575323	3.94183	0.000134881	0.000352201		1.49001
orf19.4614	C4_01790W_A		0.575245	2.35413	0.00175184	0.00377469		1.48993
orf19.728	CR_07580C_A	TSC11	0.573405	3.21982	1.71472e-05	5.14133e-05		1.48803
orf19.7176	C7_04040C_A	NPT1	0.57306	5.28285	8.08976e-11	4.56775e-10		1.48768
orf19.4953	C1_13270W_A		0.572992	1.40809	0.0144003	0.0259235		1.48761
orf19.3467	C6_02260C_A	SEC27	0.572011	7.13905	4.07545e-19	5.16287e-18		1.48659
orf19.7365	C3_05850W_A		0.571954	1.10733	0.0377791	0.0615192		1.48654
orf19.1672	C3_01720C_A		0.571279	7.1763	2.96584e-19	3.85559e-18		1.48584
orf19.6821	C3_06810W_A		0.571277	2.60782	0.00114349	0.00254731		1.48584
orf19.1910	C2_00110W_A		0.569761	5.1254	1.07081e-10	5.9538e-10		1.48428
orf19.1135	C1_11810W_A	CAS1	0.569673	2.3261	0.000916049	0.00208314		1.48419
orf19.1730	C3_01210C_A		0.569196	5.14922	2.58842e-10	1.39102e-09		1.4837
orf19.1634	C3_02120W_A		0.567557	4.183	2.61198e-05	7.67567e-05		1.48201
orf19.1317	C4_03590C_A	OSH3	0.567226	5.21412	4.16082e-11	2.44807e-10		1.48167
orf19.3006			0.567214	5.83936	3.323e-14	2.66035e-13		1.48166
orf19.6581	C7_01480W_A		0.567046	4.33977	2.96497e-09	1.41882e-08		1.48149
orf19.2828	CR_02690W_A		0.566981	2.8152	0.000106302	0.000280935		1.48142
orf19.2322.3	C1_10940C_A	ERP5	0.56692	7.34535	1.21635e-18	1.49243e-17		1.48136
orf19.7498	CR_00360C_A	LEU1	0.566617	8.51016	5.76982e-19	7.24212e-18		1.48105
orf19.3844	C4_04430W_A	MRP8	0.565859	3.8264	2.76291e-07	1.05346e-06		1.48027
orf19.3235	CR_01180W_A		0.56579	2.16841	0.00533174	0.0104642		1.4802
orf19.7409	C3_06250W_A	ERV25	0.564501	6.64862	1.29304e-17	1.44969e-16		1.47888
orf19.979	C5_00190C_A	FAS1	0.564339	11.4619	6.46135e-25	1.45781e-23		1.47871
orf19.1258	C4_05730W_A		0.564236	0.634512	0.0718607	0.108807		1.4786
orf19.1212	C6_04100W_A		0.56388	6.46314	2.40715e-18	2.83867e-17		1.47824
orf19.3563	C2_05330C_A		0.563822	3.15922	6.58667e-05	0.000180267		1.47818
orf19.2079	C2_00480C_A	PHHB	0.563496	4.07579	1.31927e-05	4.03089e-05		1.47785
orf19.7112	C7_00100W_A	FRP2	0.563103	4.94577	1.78762e-11	1.08449e-10		1.47744
orf19.5224	C1_12410C_A	PKH2	0.563066	4.82477	1.80243e-10	9.861e-10		1.47741
orf19.5875	C3_04320W_A	VAM3	0.562747	3.94469	3.88355e-07	1.45036e-06		1.47708
orf19.7092	C7_00300W_A		0.561714	4.75536	6.4248e-10	3.29384e-09		1.47602
orf19.4993	C1_13580W_A	SEC18	0.561706	4.80468	2.72076e-08	1.179e-07		1.47601
orf19.246	C3_02570W_A		0.561453	2.2592	0.00152835	0.00332594		1.47575
orf19.2065	C2_00630C_A		0.560637	1.35445	0.0325105	0.0538717		1.47492
orf19.7642	CR_10590W_A		0.560401	5.14268	5.94445e-12	3.73495e-11		1.47468
orf19.360	C3_03610W_A	FUR4	0.559977	3.55726	2.91021e-06	9.74234e-06		1.47425
orf19.709	CR_06750C_A	PUP2	0.559619	5.49137	4.13026e-13	2.91359e-12		1.47388
orf19.288	C3_02950C_A	MET13	0.559071	4.39138	3.05888e-09	1.45935e-08		1.47332
orf19.3030			0.558917	2.59563	0.000450062	0.00108205		1.47316
orf19.6084			0.558588	1.95458	0.0063195	0.0121924		1.47283
orf19.3271	CR_00840C_A		0.558303	2.01376	0.128897	0.181902		1.47254
orf19.692	C6_02020C_A		0.558301	3.54021	6.953e-05	0.000189249		1.47253
orf19.364	C4_00020W_A		0.557942	7.61255	1.16176e-14	9.8344e-14		1.47217
orf19.2598	CR_01970C_A	VMA4	0.557774	6.71994	8.53051e-20	1.18882e-18		1.472
orf19.5691	C5_00070W_A	CDC11	0.557457	6.75613	1.00314e-12	6.82084e-12		1.47167
orf19.1246	C4_05610C_A		0.555662	5.6221	3.56595e-13	2.5253e-12		1.46984
orf19.6889	C2_05780C_A	MKK2	0.555346	5.51714	4.33061e-14	3.39729e-13		1.46952
orf19.996	C1_10520W_A		0.554862	2.11126	0.00196272	0.00419103		1.46903
orf19.6376	CR_08160W_A	PTC5	0.55456	6.81349	9.00968e-15	7.69306e-14		1.46872
orf19.2911	C4_06250C_A	SEC3	0.554198	5.964	1.01448e-15	9.32501e-15		1.46835
orf19.1517	C2_02030W_A	ARO3	0.554043	9.45734	6.15695e-22	1.08442e-20		1.46819
orf19.4756	C1_09000W_A		0.554014	1.18162	0.0331333	0.0547707		1.46817
orf19.3678			0.552618	4.40893	5.01497e-08	2.10305e-07		1.46674
orf19.2437	C1_06080C_A	ARC35	0.552315	1.74789	0.00860931	0.016226		1.46644
orf19.3546	C2_05150W_A	PEX2	0.552054	2.79084	0.000299646	0.000738963		1.46617
orf19.7006	C7_01070C_A		0.551956	4.49959	1.8222e-08	8.03005e-08		1.46607
orf19.5992	C3_05170W_A	WOR2	0.550839	2.75052	0.000293167	0.000723639		1.46494
orf19.2104	C2_00290W_A		0.550798	3.59386	1.20919e-05	3.72165e-05		1.4649
orf19.3733	CR_02360W_A	IDP2	0.550509	9.68669	3.5328e-18	4.09535e-17		1.4646
orf19.6771	C3_07270C_A	UBI4	0.550388	9.39288	9.59216e-18	1.09111e-16		1.46448
orf19.4600.1	C4_01920W_A	DPM3	0.550311	5.23461	8.02606e-09	3.67945e-08		1.4644
orf19.6884	C2_05730C_A	GWT1	0.550232	3.88831	4.14356e-07	1.54008e-06		1.46432
orf19.4862	C1_09950C_A		0.549021	3.5642	9.71867e-06	3.03202e-05		1.46309
orf19.317	C3_03180C_A	PNP1	0.54884	4.05929	6.17127e-06	1.97163e-05		1.46291
orf19.1516	C2_02020W_A		0.54805	5.43245	7.43648e-12	4.62451e-11		1.46211
orf19.5849	CR_05530C_A	CWT1	0.547621	6.25581	2.26349e-14	1.84733e-13		1.46167
orf19.1944	C5_01250W_A	GPR1	0.547585	6.48412	3.62425e-16	3.49002e-15		1.46164
orf19.7425	C3_06400C_A		0.5471	3.7087	2.71375e-06	9.14507e-06		1.46115
orf19.5095	C1_08180C_A		0.546203	6.81952	1.34016e-17	1.49638e-16		1.46024
orf19.2525	CR_01400W_A	LYS12	0.546138	5.71428	1.06286e-11	6.54251e-11		1.46017
orf19.3605	C2_08710W_A	PEX17	0.545691	1.04637	0.0639693	0.0984698		1.45972
orf19.1881	C2_07480W_A	LPT1	0.545486	5.02908	3.42035e-08	1.46702e-07		1.45951
orf19.5158	C7_03030W_A		0.54515	0.523086	0.0719071	0.108847		1.45917
orf19.1332	C7_03440W_A	SNG4	0.545076	3.42524	0.000101154	0.000268106		1.4591
orf19.4591	C4_02020W_A	CAT2	0.544993	3.87605	4.42844e-06	1.44526e-05		1.45901
orf19.2805	C3_04030C_A	PEX8	0.544984	2.23183	0.00162064	0.00351279		1.459
orf19.6082			0.544678	8.39677	1.51438e-19	2.06197e-18		1.45869
orf19.5043	C4_03880W_A		0.544399	1.3535	0.025841	0.0437765		1.45841
orf19.6237	C1_06730W_A	RAC1	0.543148	6.56385	3.17222e-17	3.40951e-16		1.45715
orf19.4377	CR_03790C_A	KRE1	0.542566	5.24023	5.39162e-07	1.97838e-06		1.45656
orf19.2446	C1_05990C_A		0.542284	0.792277	0.0732791	0.110679		1.45628
orf19.5526	C6_02570C_A	SEC20	0.542209	2.99561	9.2622e-05	0.000247052		1.4562
orf19.3901	C5_04180W_A		0.542194	2.03616	0.00473072	0.00939037		1.45619
orf19.554	CR_04630C_A	DIT2	0.541979	1.66935	0.0108259	0.0199627		1.45597
orf19.1639	C3_02070C_A		0.541862	0.430586	0.178689	0.242697		1.45585
orf19.1714	C3_01370C_A	PGA44	0.541815	0.622888	0.103562	0.150095		1.4558
orf19.7244	C1_14320C_A		0.539156	3.93245	1.94231e-05	5.80461e-05		1.45312
orf19.4150	C5_01560C_A		0.538849	4.64276	3.69334e-08	1.57421e-07		1.45281
orf19.376	C4_00080C_A		0.538569	0.523376	0.12622	0.178585		1.45253
orf19.1974	C5_00930C_A	TFS1	0.536737	2.15445	0.00307312	0.00635578		1.45069
orf19.6950	C3_03690W_A		0.536203	0.346782	0.154326	0.213321		1.45015
orf19.4864	C1_09980C_A		0.536099	0.586747	0.0873708	0.129491		1.45005
orf19.5274	C1_11930W_A		0.535999	6.0065	1.62566e-12	1.07851e-11		1.44995
orf19.3140.1	C4_06690C_A		0.535668	5.80922	1.06219e-12	7.18659e-12		1.44961
orf19.7108	C7_00150W_A		0.535646	7.19399	1.72218e-14	1.42471e-13		1.44959
orf19.6080			0.535571	4.69092	9.17543e-08	3.74703e-07		1.44952
orf19.2886	C4_06480C_A	CEK1	0.535239	3.17776	4.09167e-05	0.000116478		1.44918
orf19.87	C6_00860W_A	GPX1	0.534929	2.26429	0.00325544	0.00669985		1.44887
orf19.5469	C3_00030C_A		0.53486	4.99817	5.45289e-09	2.54468e-08		1.4488
orf19.7379	C3_05980C_A	FAA2	0.534857	2.82875	0.00115372	0.00256591		1.4488
orf19.3456	C6_02160W_A		0.53275	1.45669	0.023315	0.0399309		1.44668
orf19.7264	C1_14460W_A		0.53188	7.44354	8.77566e-15	7.53382e-14		1.44581
orf19.2495	C1_05600W_A	GSL1	0.531798	3.60941	3.84893e-06	1.2675e-05		1.44573
orf19.5694	C5_00050W_A		0.531723	5.41273	9.21817e-11	5.15688e-10		1.44565
orf19.6798	C3_07020W_A	SSN6	0.531665	8.6553	2.74963e-19	3.60024e-18		1.4456
orf19.4330	C5_03030W_A		0.531064	4.2084	8.31359e-07	2.96681e-06		1.44499
orf19.3371	C4_03450C_A	JAB1	0.530901	4.68802	4.62709e-08	1.95088e-07		1.44483
orf19.4757	C1_09010W_A	NAR1	0.530394	7.15558	3.27118e-19	4.21242e-18		1.44432
orf19.6076			0.530205	3.86915	1.54325e-05	4.65792e-05		1.44413
orf19.7157	C7_04170W_A		0.530063	0.484946	0.101789	0.147653		1.44399
orf19.156	C2_04720C_A	FGR51	0.529552	3.74938	0.000603534	0.00141429		1.44348
orf19.7276.1	C1_14590C_A	TLO4	0.527686	2.34102	0.00231531	0.00488282		1.44162
orf19.5087	C1_08120W_A	BUD6	0.52764	5.35372	9.69145e-09	4.39861e-08		1.44157
orf19.3050			0.527631	4.47552	1.56396e-06	5.42172e-06		1.44156
orf19.5841	C2_02660W_A		0.527307	2.74132	0.00418471	0.0083971		1.44124
orf19.1949	C5_01210W_A	VPS1	0.526866	6.75021	2.33301e-16	2.28284e-15		1.4408
orf19.7272	C1_14550C_A		0.526497	2.30597	0.00223804	0.00473264		1.44043
orf19.4064	C1_05070C_A	GPI7	0.52568	4.67937	4.30945e-08	1.82683e-07		1.43961
orf19.5902	C3_04480C_A	RAS2	0.524879	2.05878	0.00823654	0.0155773		1.43881
orf19.738	C4_05100C_A	MYO5	0.524092	5.33763	1.13963e-11	6.99929e-11		1.43803
orf19.5281	C1_11860W_A		0.524058	8.90431	9.13799e-22	1.58896e-20		1.43799
orf19.4090	C2_09280C_A		0.523414	2.37336	0.00378166	0.00765587		1.43735
orf19.215	C2_08920W_A		0.522577	3.8053	5.39768e-06	1.74078e-05		1.43652
orf19.2786	C1_07590C_A		0.5219	3.52759	4.72222e-05	0.000132904		1.43585
orf19.1037			0.521626	1.94058	0.028511	0.0478249		1.43557
orf19.6484	C7_02280W_A		0.520913	0.299115	0.165258	0.226654		1.43486
orf19.6086			0.520888	5.4275	3.11657e-10	1.65369e-09		1.43484
orf19.1182	C6_00240C_A		0.520531	2.21101	0.00524368	0.0103062		1.43448
orf19.5467	C3_00060W_A	TLO7	0.520369	3.68397	0.00112189	0.00250431		1.43432
orf19.2298	C1_11170W_A	WBP1	0.519432	6.97499	1.08803e-17	1.2325e-16		1.43339
orf19.3743	CR_02260C_A		0.519319	2.89009	0.000504994	0.00120352		1.43328
orf19.1574	C2_02500W_A		0.518977	4.25654	2.54671e-06	8.59396e-06		1.43294
orf19.3269	CR_00850C_A	GSL2	0.518046	3.86332	2.93022e-06	9.8033e-06		1.43201
orf19.2290	C2_07330W_A	TOR1	0.517676	6.73933	6.17996e-15	5.36448e-14		1.43165
orf19.7110	C7_00130W_A		0.517582	3.71789	3.94813e-05	0.000112863		1.43155
orf19.4262	C5_02500C_A		0.517571	4.59618	9.72131e-06	3.03202e-05		1.43154
orf19.7510	CR_00260W_A	KIN2	0.517258	7.24832	1.73046e-15	1.56429e-14		1.43123
orf19.1618	C3_02280C_A	GFA1	0.517031	6.31423	2.29388e-11	1.37481e-10		1.43101
orf19.3969	C5_04830W_A	SFL2	0.516581	8.67648	7.42476e-16	6.95355e-15		1.43056
orf19.1460	C2_01530C_A		0.516077	6.27895	1.30003e-15	1.18699e-14		1.43006
orf19.1990	C2_01350C_A	SNX4	0.515457	2.92453	0.00106523	0.00238856		1.42945
orf19.6309	CR_04840C_A	MSS11	0.514973	4.62517	7.97919e-07	2.8512e-06		1.42897
orf19.362	C4_00010W_A	TLO9	0.514175	3.89064	8.71194e-06	2.74479e-05		1.42818
orf19.1505	C2_01930C_A		0.513787	4.70269	3.26097e-06	1.08633e-05		1.42779
orf19.3851	CR_06020W_A		0.513678	2.75977	0.000497086	0.00118623		1.42769
orf19.3827	C4_04550C_A	OMA1	0.512629	4.44517	2.64498e-07	1.00946e-06		1.42665
orf19.5246	C1_12180C_A		0.510969	2.51649	0.00169762	0.00366945		1.42501
orf19.7598	CR_10230W_A		0.510929	4.78623	3.91784e-08	1.66729e-07		1.42497
orf19.134	C6_01260W_A		0.510834	2.34452	0.0170082	0.0300145		1.42487
orf19.1359	C2_09930W_A		0.509795	3.49659	9.17877e-05	0.000245186		1.42385
orf19.675	C1_11270W_A		0.509107	3.99188	4.21821e-06	1.38161e-05		1.42317
orf19.1880	C2_07490W_A	HEM15	0.508745	6.60289	6.71538e-13	4.62954e-12		1.42281
orf19.2747	C4_02540W_A	RGT1	0.50808	4.52582	2.79521e-07	1.06503e-06		1.42216
orf19.1414	C4_04330C_A		0.508074	5.8096	5.08997e-09	2.38142e-08		1.42215
orf19.7109	C7_00140C_A		0.508024	5.55634	5.09927e-11	2.9525e-10		1.4221
orf19.3123	C4_06870W_A	RPT5	0.507901	7.34563	8.05343e-13	5.53104e-12		1.42198
orf19.1373	C2_09770C_A	INP51	0.507863	4.07264	4.30568e-06	1.40773e-05		1.42194
orf19.2730	C4_02690W_A		0.505712	4.48372	8.42706e-06	2.65964e-05		1.41982
orf19.2734	C4_02660W_A		0.505283	0.0372803	0.206409	0.275078		1.4194
orf19.5139	C7_03160W_A		0.505261	5.3398	3.50777e-10	1.84691e-09		1.41938
orf19.5811	C2_02940W_A	MET1	0.505142	6.61589	4.35621e-11	2.55203e-10		1.41926
orf19.7417	C3_06180C_A	TSA1	0.504163	11.5702	1.96231e-11	1.18651e-10		1.4183
orf19.3108	C4_07010C_A		0.503207	3.42522	2.70211e-05	7.91208e-05		1.41736
orf19.1576	C2_02520W_A		0.502941	2.89493	0.0003927	0.000954224		1.4171
orf19.711	CR_06550C_A		0.502594	1.31558	0.0623723	0.0960927		1.41676
orf19.1301	C4_03770W_A		0.502491	3.24049	0.000107135	0.000282725		1.41666
orf19.5584	C6_03020W_A	PEP3	0.502462	2.97149	0.000291379	0.000719553		1.41663
orf19.3826	C4_04560C_A		0.502409	6.32877	3.41684e-12	2.19999e-11		1.41658
orf19.4736	C1_08780W_A		0.50228	6.23439	3.22686e-13	2.29709e-12		1.41645
orf19.4312	C5_02900W_A		0.501434	5.69969	6.3663e-10	3.26692e-09		1.41562
orf19.7310	CR_09140C_A		0.501053	2.04105	0.0206364	0.0357811		1.41525
orf19.5431	C3_00360W_A		0.500868	6.93778	1.52228e-14	1.27479e-13		1.41506
orf19.5886	C3_04390W_A	CUP5	0.500143	7.52678	3.41411e-14	2.72529e-13		1.41435
orf19.2549	CR_01610C_A	SHP1	0.499929	6.15346	5.87689e-13	4.08242e-12		1.41414
orf19.1843	CR_06900C_A	ALG6	0.499613	3.40912	0.000123798	0.000324657		1.41383
orf19.2534	CR_01500W_A	PIN4	0.499467	5.8312	4.36182e-11	2.55258e-10		1.41369
orf19.7595	CR_10190C_A		0.499325	1.50266	0.0295514	0.0494334		1.41355
orf19.7398.1	C3_06330W_A	TSA1B	0.49913	11.5665	5.24053e-11	3.02786e-10		1.41336
orf19.4239	C5_02310C_A		0.49893	2.75546	0.00137299	0.0030155		1.41316
orf19.3264.1	CR_00910W_A		0.497716	3.09299	0.0222106	0.0382313		1.41198
orf19.1693	C3_01530C_A	CAS4	0.496907	7.45449	6.48777e-14	5.01036e-13		1.41118
orf19.7042	C7_00770W_A		0.496105	5.41746	1.31987e-09	6.55137e-09		1.4104
orf19.5278	C1_11890W_A		0.495671	1.48333	0.0345507	0.0568213		1.40998
orf19.2296	C1_11200W_A		0.494808	3.46729	0.000111305	0.000293163		1.40913
orf19.5533	C6_02630C_A		0.492795	3.77022	3.02076e-05	8.76372e-05		1.40717
orf19.1745	C2_10330C_A		0.491407	2.70262	0.00140302	0.00307106		1.40581
orf19.4966	C1_13400C_A	AGC1	0.489802	4.44692	2.3822e-07	9.16616e-07		1.40425
orf19.7473	CR_00600C_A		0.489275	3.63874	3.42745e-05	9.88061e-05		1.40374
orf19.2480.1	C1_05700W_A	AUT7	0.487966	1.70982	0.019293	0.0336871		1.40247
orf19.3084	C4_07210W_A		0.487617	2.95443	0.0026249	0.00549538		1.40213
orf19.752	C1_04910C_A		0.487468	4.60123	1.97829e-07	7.70434e-07		1.40198
orf19.6119	CR_07460C_A		0.487418	3.37386	0.000671552	0.00156228		1.40193
orf19.5462	C3_00140W_A		0.487293	3.88774	0.00288971	0.00599461		1.40181
orf19.6927	C3_03880C_A	PEP8	0.487227	4.77363	1.10129e-06	3.87689e-06		1.40175
orf19.2608	CR_02070C_A	ADH5	0.486355	2.97033	0.000693001	0.00160602		1.4009
orf19.6953	C3_03660W_A	IRS4	0.48625	5.06423	8.66323e-10	4.39602e-09		1.4008
orf19.5880	C3_04360W_A		0.485	4.83029	1.57132e-08	6.97512e-08		1.39959
orf19.31	C2_06550W_A		0.484891	1.71942	0.104273	0.150896		1.39948
orf19.1543	C2_02250C_A	OPI1	0.484771	4.32341	3.1434e-06	1.04844e-05		1.39936
orf19.6091			0.484647	6.89031	2.72318e-12	1.76796e-11		1.39924
orf19.5015	C1_13780W_A	MYO2	0.484536	7.95793	1.32854e-10	7.35681e-10		1.39914
orf19.2862	CR_02990C_A	RIB1	0.484372	5.80047	1.09109e-08	4.91123e-08		1.39898
orf19.454	CR_05990C_A	SFL1	0.484349	7.99569	4.60058e-15	4.01907e-14		1.39895
orf19.7181	C7_04000W_A		0.484238	5.1394	3.17546e-09	1.51028e-08		1.39885
orf19.6598	CR_09650W_A	WAL1	0.482674	5.32133	8.75447e-10	4.4382e-09		1.39733
orf19.1364	C2_09870W_A		0.482126	5.40594	5.52237e-10	2.85532e-09		1.3968
orf19.6272	C1_06390W_A		0.482044	1.08337	0.0988315	0.14386		1.39672
orf19.2601	CR_02000C_A	HEM1	0.48167	9.08395	1.5159e-15	1.37947e-14		1.39636
orf19.6219	C1_06920C_A		0.481612	4.22667	1.437e-06	5.01024e-06		1.3963
orf19.1502	C2_01910W_A		0.481394	0.780868	0.101494	0.147343		1.39609
orf19.4618	C4_01750C_A	FBA1	0.480566	8.74793	1.78873e-06	6.15405e-06		1.39529
orf19.5003	C1_13650C_A		0.480227	3.11027	0.000657923	0.00153319		1.39496
orf19.4339	C5_03090W_A	VPS4	0.480166	4.97829	1.35609e-06	4.74934e-06		1.3949
orf19.335	C3_03380W_A		0.479337	1.22529	0.0700342	0.106514		1.3941
orf19.4246	C5_02380W_A		0.478921	5.19818	7.21617e-08	2.9781e-07		1.3937
orf19.2174	C2_08110W_A	RAD57	0.478876	2.32554	0.00400103	0.00806408		1.39366
orf19.5408	C3_00550C_A	HRK1	0.478707	6.9188	2.98665e-15	2.64726e-14		1.39349
orf19.3087.1	C4_07170C_A		0.478512	2.30073	0.00391127	0.00789367		1.39331
orf19.342	C3_03450C_A	BMT7	0.478497	0.455992	0.160019	0.220298		1.39329
orf19.7284	CR_08890C_A	ASR2	0.478118	2.67963	0.00639862	0.012332		1.39293
orf19.5974	C3_05040C_A	ATG9	0.477973	2.68253	0.00384426	0.00777682		1.39278
orf19.4025	C5_05310W_A	PRE1	0.477892	4.93647	1.20807e-07	4.82875e-07		1.39271
orf19.3174	C5_01970C_A	CDC24	0.477817	6.72807	8.90376e-13	6.09204e-12		1.39263
orf19.3767	C1_12490W_A	PEP1	0.477333	5.63727	5.73261e-07	2.09505e-06		1.39217
orf19.557	CR_05210W_A		0.477196	0.705355	0.13923	0.194523		1.39204
orf19.5947	C3_04820C_A	SEC7	0.477078	6.82827	2.142e-14	1.7508e-13		1.39192
orf19.3545	C2_05140W_A	CDC15	0.476418	3.78973	0.00101874	0.00229752		1.39128
orf19.3517	CR_05460W_A		0.476352	3.03379	0.000421343	0.00101839		1.39122
orf19.4263	C5_02510C_A		0.476334	4.04882	5.43141e-06	1.74959e-05		1.3912
orf19.71			0.476071	5.48108	2.62749e-10	1.41063e-09		1.39095
orf19.7556	CR_09840C_A		0.475756	2.07754	0.0153198	0.0273891		1.39065
orf19.6983	C3_05450C_A		0.4757	4.65596	0.000115929	0.000304754		1.39059
orf19.4755	C1_08990C_A	KEX2	0.475382	7.68043	8.55187e-16	7.92754e-15		1.39029
orf19.7389	C3_06080W_A	REV3	0.474968	3.93254	5.16432e-05	0.000144379		1.38989
orf19.3184	C5_01880C_A		0.47493	2.11678	0.0133843	0.0242382		1.38985
orf19.7106	C7_00170W_A	VPS70	0.474117	3.75125	0.000115241	0.00030309		1.38907
orf19.2204	C2_07760W_A		0.473627	3.18467	0.00112638	0.00251329		1.3886
orf19.7178	C7_04020C_A	PRE5	0.473511	5.80231	2.49868e-08	1.08881e-07		1.38848
orf19.1893	C2_07390C_A		0.473495	4.47647	1.44682e-06	5.03802e-06		1.38847
orf19.4449	C1_07180W_A	CCS1	0.47262	6.55018	1.6269e-13	1.20039e-12		1.38763
orf19.3646	C6_00790C_A	CTR1	0.471747	4.18313	2.98399e-05	8.67088e-05		1.38679
orf19.1600	C2_09420W_A		0.470805	4.60326	9.03449e-07	3.20939e-06		1.38588
orf19.7196	C7_03860W_A		0.47037	3.60808	0.000829101	0.00189807		1.38546
orf19.3843	C4_04440W_A		0.470181	7.07563	1.9917e-13	1.46362e-12		1.38528
orf19.988	C1_10460W_A		0.470168	3.14413	0.000521044	0.00123745		1.38527
orf19.2737	C4_02620C_A		0.469408	1.73212	0.0356948	0.0584588		1.38454
orf19.1761	C2_10200W_A		0.469358	1.68583	0.0290593	0.0486848		1.38449
orf19.231	C3_02430W_A	APL2	0.468467	5.0768	1.19062e-08	5.34166e-08		1.38364
orf19.3308			0.46824	5.19999	6.05985e-07	2.21021e-06		1.38342
orf19.6645	CR_05670C_A	HMO1	0.468148	4.76859	5.82838e-05	0.000161292		1.38333
orf19.4548			0.467774	1.65818	0.0325953	0.0539796		1.38297
orf19.1002	C1_10560C_A		0.467496	1.75345	0.025821	0.0437563		1.38271
orf19.2163	C6_04650W_A		0.466288	7.133	2.58503e-12	1.68027e-11		1.38155
orf19.899	C2_03290W_A		0.465181	0.344926	0.184396	0.249394		1.38049
orf19.2346	C1_10730W_A		0.464757	2.88374	0.00429126	0.00858567		1.38008
orf19.4482			0.464327	1.00269	0.0886238	0.131063		1.37967
orf19.6094			0.463912	5.90656	7.30428e-07	2.62896e-06		1.37928
orf19.3930	C5_04430C_A	YUH2	0.463661	5.75309	6.18487e-10	3.17979e-09		1.37904
orf19.7446	C3_06570C_A	OPI3	0.463431	3.00993	0.00103403	0.00232721		1.37882
orf19.6374	CR_08130W_A		0.463322	6.09525	1.26901e-08	5.68401e-08		1.37871
orf19.3518	CR_05480W_A		0.462716	6.38983	1.40911e-12	9.3975e-12		1.37813
orf19.2940			0.46211	3.63114	0.000863442	0.00197173		1.37755
orf19.2127	C6_04430W_A	CST5	0.462018	3.37177	0.000934407	0.00212136		1.37747
orf19.1840	C1_10680C_A		0.461718	6.90671	8.36545e-14	6.3438e-13		1.37718
orf19.6472	C7_02380C_A	CYP1	0.461026	8.79621	9.64801e-14	7.29614e-13		1.37652
orf19.5723	C6_03560W_A	POX1	0.45992	4.52724	2.78875e-06	9.37148e-06		1.37547
orf19.4416	C4_06060W_A	VPS13	0.457941	5.73592	1.12385e-08	5.05456e-08		1.37358
orf19.1698	C3_01510W_A		0.45783	4.93585	3.81367e-07	1.42718e-06		1.37347
orf19.4753	C1_08950W_A	PFK26	0.457774	5.44891	4.10955e-08	1.74344e-07		1.37342
orf19.2483	C1_05680C_A	RIM1	0.457508	4.63506	0.000110908	0.000292399		1.37317
orf19.2910	C4_06260W_A	PGA43	0.457482	2.10876	0.0130617	0.0237012		1.37314
orf19.2014	C2_01110C_A	BCY1	0.457173	6.39127	9.74956e-11	5.4319e-10		1.37285
orf19.2068	C2_00590W_A		0.457132	4.717	6.51348e-05	0.000178442		1.37281
orf19.6626	CR_05880W_A		0.456394	3.56489	8.82693e-05	0.000236482		1.37211
orf19.2877	C4_06570C_A	PDC11	0.456234	8.39168	6.98332e-05	0.000189885		1.37196
orf19.5348	C2_10690W_A	TPS3	0.4561	5.30039	4.52273e-08	1.91131e-07		1.37183
orf19.4381	CR_03610C_A	VTC3	0.455841	6.07369	1.23843e-09	6.15829e-09		1.37158
orf19.3643	C6_00810C_A		0.455449	3.96008	2.68757e-05	7.88083e-05		1.37121
orf19.1069			0.454997	7.28386	4.88841e-14	3.81841e-13		1.37078
orf19.908	C2_03230C_A	FEN12	0.454863	6.09788	7.56148e-09	3.48109e-08		1.37065
orf19.330.1	C3_03320W_A	RUB1	0.454563	4.15324	9.23208e-05	0.000246369		1.37037
orf19.6305	CR_04880W_A		0.454332	1.60601	0.0449058	0.0719341		1.37015
orf19.1792	C4_05340W_A		0.454061	2.9955	0.00205304	0.00436852		1.36989
orf19.842	C2_03790C_A	ASR3	0.453944	3.72918	0.000855577	0.0019554		1.36978
orf19.4589	C4_02040W_A		0.453647	1.9942	0.0248803	0.0423329		1.3695
orf19.7009	C7_01050W_A		0.45342	0.795298	0.164552	0.225856		1.36928
orf19.4072	C2_09130C_A	IFF6	0.453255	4.21689	5.59202e-05	0.000155223		1.36913
orf19.4478			0.45272	4.82336	1.9085e-07	7.44315e-07		1.36862
orf19.3631	C2_08470C_A	STN1	0.452513	1.44399	0.0704027	0.106985		1.36842
orf19.5773	C6_03960W_A		0.452287	5.38158	9.38444e-08	3.82096e-07		1.36821
orf19.315	C3_03160C_A		0.451842	3.29611	0.000262882	0.000653315		1.36779
orf19.4675	C4_01150W_A	ASK1	0.451594	3.91147	1.41222e-05	4.29567e-05		1.36755
orf19.3199	C5_01760C_A	PIKA	0.451435	4.66049	2.2602e-05	6.69962e-05		1.3674
orf19.5929	C3_04690C_A		0.45083	2.68704	0.0159199	0.0283413		1.36683
orf19.3458	C6_02180W_A		0.450615	3.25556	0.00606831	0.011741		1.36662
orf19.1702	C3_01470W_A	ARF3	0.449509	4.49764	2.13853e-05	6.35622e-05		1.36558
orf19.1186	C6_00270W_A		0.449474	5.67976	1.36744e-09	6.77515e-09		1.36554
orf19.7152	C7_04210C_A		0.449411	6.93936	7.38287e-08	3.04001e-07		1.36548
orf19.4557			0.449058	2.77712	0.00241411	0.00507744		1.36515
orf19.234	C3_02460C_A	PHA2	0.449006	4.14107	7.39922e-05	0.000200164		1.3651
orf19.4715	C4_06130W_A		0.448716	7.36978	4.2005e-13	2.95932e-12		1.36483
orf19.99	C6_00970C_A	HAL21	0.44793	5.40716	1.09166e-07	4.39562e-07		1.36408
orf19.5065	C1_07930C_A	ERD1	0.447616	1.59103	0.0527319	0.0828059		1.36378
orf19.7251	C1_14360C_A	WSC4	0.447486	3.23597	0.00260318	0.00545426		1.36366
orf19.4773	C1_09150W_A	AOX2	0.4463	8.87379	7.46815e-11	4.24309e-10		1.36254
orf19.3639	C2_08420W_A		0.445159	2.24265	0.00914963	0.0171379		1.36146
orf19.3234	CR_01200W_A	OYE22	0.44506	0.894413	0.134694	0.188862		1.36137
orf19.1401	C2_09530W_A	EAP1	0.444982	6.27161	8.80324e-09	4.02223e-08		1.3613
orf19.1155	C1_11640C_A	DPP2	0.443933	4.76231	4.59483e-07	1.70202e-06		1.36031
orf19.301	C3_03050C_A	PGA18	0.443211	4.21436	4.68112e-05	0.000131883		1.35963
orf19.7576	CR_10000C_A		0.442821	2.41783	0.00915308	0.0171385		1.35926
orf19.4099	C2_06170C_A	ECM17	0.441946	9.60443	2.98405e-15	2.64726e-14		1.35844
orf19.2848	CR_02910W_A		0.441163	4.05985	5.73557e-05	0.000158885		1.3577
orf19.2328	C1_10890C_A		0.441098	5.30553	7.31607e-07	2.63147e-06		1.35764
orf19.5244	C1_12200W_A	MCD4	0.440976	3.62615	0.000399051	0.000968794		1.35752
orf19.782			0.44085	3.87534	0.000337459	0.000827359		1.3574
orf19.2110	C2_00230W_A		0.440195	4.06198	0.000229525	0.000575923		1.35679
orf19.3677			0.440147	1.66979	0.0368283	0.0600949		1.35674
orf19.3097	C4_07110C_A	PDA1	0.440059	8.69895	6.25957e-12	3.92842e-11		1.35666
orf19.7210	C1_14030W_A		0.439009	2.52149	0.006779	0.0130008		1.35567
orf19.4230	C5_02230W_A		0.438684	6.3263	4.79303e-11	2.78997e-10		1.35537
orf19.1191	C6_00310W_A		0.438501	6.03582	1.37142e-09	6.78871e-09		1.3552
orf19.1418	C4_04290W_A	SEC15	0.438229	5.25537	7.44917e-08	3.06499e-07		1.35494
orf19.7434	C3_06450W_A	GLG2	0.438108	1.68037	0.0359852	0.0588614		1.35483
orf19.511	CR_04230W_A		0.437842	4.4725	1.37072e-05	4.18108e-05		1.35458
orf19.1877	C2_07510W_A		0.437818	2.44099	0.012586	0.0229141		1.35455
orf19.2151	C6_04570W_A	NAG6	0.437406	6.26554	4.78016e-08	2.01231e-07		1.35417
orf19.1433	C2_08390W_A		0.437265	2.43722	0.0100684	0.0186858		1.35404
orf19.5245	C1_12190W_A	BUL4	0.434583	1.80107	0.0593431	0.0919709		1.35152
orf19.5527	C6_02580W_A		0.434474	4.14627	0.000305009	0.000751512		1.35142
orf19.6832	C3_06710W_A		0.434409	5.30781	2.56252e-08	1.11307e-07		1.35136
orf19.6310	CR_04830C_A		0.434048	3.21343	0.00194486	0.00415776		1.35102
orf19.3453	C6_02140W_A		0.433876	4.7679	8.22135e-06	2.59922e-05		1.35086
orf19.3213	C5_03980W_A		0.433569	5.69886	7.1308e-08	2.94956e-07		1.35057
orf19.4209	C6_00500C_A		0.433493	3.11056	0.0059913	0.0116043		1.3505
orf19.2245	C2_06910W_A	YPT72	0.433075	4.77607	4.91383e-07	1.81403e-06		1.35011
orf19.2484	C1_05670W_A		0.432433	5.30344	5.74618e-08	2.39315e-07		1.34951
orf19.3307			0.432187	4.37072	8.85322e-06	2.78608e-05		1.34928
orf19.6238	C1_06720C_A		0.43186	3.23651	0.00289206	0.0059972		1.34897
orf19.4236	C5_02300C_A	RET2	0.431691	6.9481	1.97517e-12	1.29776e-11		1.34881
orf19.2623	CR_07530C_A	ECM22	0.431346	6.09975	1.89982e-08	8.35185e-08		1.34849
orf19.5718	C6_03520C_A		0.4312	2.4456	0.0109939	0.0202383		1.34836
orf19.5612	C6_03250W_A	BMT4	0.431075	4.43005	2.34386e-05	6.9213e-05		1.34824
orf19.6377	CR_08170C_A		0.430959	4.8729	2.50701e-07	9.59907e-07		1.34813
orf19.896	C2_03320W_A	CHK1	0.430544	4.06844	3.47113e-05	0.000100012		1.34774
orf19.1754	C2_10260C_A	CMK2	0.430271	2.74141	0.00518249	0.0102042		1.34749
orf19.2496	C3_00930W_A	ATO2	0.429945	3.85994	0.000429636	0.00103659		1.34718
orf19.7100			0.429881	4.20173	3.84403e-05	0.00011006		1.34712
orf19.2996			0.429853	5.45825	2.9488e-08	1.27377e-07		1.3471
orf19.835	C2_03900C_A		0.429843	6.04365	5.63714e-10	2.90915e-09		1.34709
orf19.3391	C6_01910W_A	ADK1	0.429701	8.80278	4.27336e-10	2.23278e-09		1.34695
orf19.6448	CR_08710W_A		0.429621	6.90562	4.03686e-10	2.12139e-09		1.34688
orf19.245	C3_02560W_A	DDC1	0.428802	2.98957	0.00469579	0.00932666		1.34612
orf19.6812	C3_06890W_A	PMT2	0.428426	7.33257	4.30419e-09	2.03119e-08		1.34576
orf19.4349	C5_03170C_A		0.428288	5.21282	4.07486e-07	1.51661e-06		1.34564
orf19.1564	C2_02410W_A		0.428034	3.57312	0.000569269	0.00134206		1.3454
orf19.147	C2_04660C_A	YAK1	0.427761	3.34355	0.000593075	0.00139157		1.34514
orf19.1523	C2_02060C_A	FMO1	0.427494	0.0910655	0.303303	0.381136		1.3449
orf19.4858	C1_09920W_A	VPS41	0.427182	3.96009	0.000209181	0.000529009		1.3446
orf19.2706	C4_02900C_A	CRH11	0.426829	5.07146	2.4229e-07	9.31624e-07		1.34428
orf19.4271	C5_02580W_A		0.426735	3.7402	0.00206842	0.00439267		1.34419
orf19.7141	C7_04270C_A	UFE1	0.426461	5.49816	1.36466e-06	4.77631e-06		1.34393
orf19.6264	C1_06500W_A		0.426403	4.19877	9.00991e-05	0.000240911		1.34388
orf19.1500	C2_01900C_A		0.425429	4.04687	6.6297e-05	0.000181263		1.34297
orf19.6604			0.425105	4.45364	7.2318e-05	0.000196153		1.34267
orf19.6525	C7_01960W_A		0.424909	4.79787	1.89278e-06	6.46721e-06		1.34249
orf19.6261	C1_06520C_A	BPH1	0.424858	1.47787	0.0503632	0.0794519		1.34244
orf19.764			0.424836	5.21307	9.6823e-07	3.42836e-06		1.34242
orf19.6848			0.424426	4.42885	1.67843e-05	5.03807e-05		1.34204
orf19.6713	C3_07730W_A	WOR4	0.423845	6.41332	2.97793e-06	9.95683e-06		1.3415
orf19.6031			0.423824	4.56977	1.59444e-05	4.80558e-05		1.34148
orf19.5663	C4_00360C_A	RCH1	0.423625	4.28329	3.6637e-05	0.000105283		1.34129
orf19.5735.3	C6_03670C_A		0.423399	5.46037	2.14259e-07	8.32045e-07		1.34108
orf19.5693	C5_00040C_A		0.421526	7.75543	4.96421e-11	2.8804e-10		1.33934
orf19.704	CR_06700C_A	SOL3	0.421474	3.76797	0.00173342	0.00373942		1.33929
orf19.5642	C4_00170W_A		0.420604	7.10714	1.56487e-07	6.16909e-07		1.33849
orf19.7311	CR_09150W_A		0.42039	1.56673	0.0535826	0.0839487		1.33829
orf19.6706	C7_03490W_A	GYP7	0.420243	2.66933	0.0112702	0.0206842		1.33815
orf19.1776	C2_10060C_A		0.418822	0.285745	0.257074	0.331249		1.33684
orf19.5129	C7_03260C_A		0.418783	1.60959	0.0651903	0.100095		1.3368
orf19.6214	C1_06940C_A	ATC1	0.418608	3.51801	0.000823372	0.00188574		1.33664
orf19.5234	C1_12290C_A	RBD1	0.418415	5.86535	1.37689e-09	6.80347e-09		1.33646
orf19.6582	C7_01470C_A	PRE10	0.417808	5.20274	2.89651e-06	9.70241e-06		1.3359
orf19.1991	C2_01340W_A		0.416875	6.21807	1.88569e-09	9.21743e-09		1.33503
orf19.528	CR_04380C_A	SEC26	0.416683	7.98494	1.89294e-11	1.14711e-10		1.33485
orf19.1743	C2_10350C_A	ACS1	0.416394	4.78984	4.71328e-06	1.53091e-05		1.33459
orf19.6046			0.415924	4.73518	5.64984e-06	1.81673e-05		1.33415
orf19.7044	C7_00740W_A	RIM15	0.415856	5.09925	1.23897e-07	4.94502e-07		1.33409
orf19.575	C5_00730W_A	HYR3	0.415821	6.53174	3.32391e-11	1.96626e-10		1.33406
orf19.5352	C2_10720C_A		0.415765	5.38173	2.49281e-07	9.56482e-07		1.33401
orf19.314	C3_03150W_A		0.415609	4.52871	1.13974e-05	3.52378e-05		1.33386
orf19.229	C3_02410C_A		0.414897	3.96526	0.000203863	0.000516277		1.3332
orf19.1683	C3_01600W_A	PPH21	0.414785	6.5709	2.53997e-08	1.10504e-07		1.3331
orf19.7206	C1_13990W_A	OCA6	0.414338	2.98605	0.00353216	0.00720149		1.33269
orf19.4823	C1_09600C_A	LIP6	0.413985	1.44491	0.101788	0.147653		1.33236
orf19.5917	C3_04580C_A	STP1	0.412551	5.07787	3.01613e-07	1.14203e-06		1.33104
orf19.2533.1	CR_01490C_A		0.41229	6.54968	2.30628e-09	1.11832e-08		1.3308
orf19.216	C2_08910C_A		0.412288	3.15409	0.00224188	0.00473894		1.33079
orf19.1189	C6_00290W_A		0.410337	7.8915	6.44773e-13	4.45628e-12		1.329
orf19.802	C2_04190C_A	UGA1	0.409929	1.38129	0.0896779	0.132193		1.32862
orf19.3996	C5_05040W_A		0.409929	4.56313	0.000130283	0.000340519		1.32862
orf19.7271	C1_14530W_A		0.409869	5.45369	1.584e-07	6.23999e-07		1.32857
orf19.1288	C3_00810C_A	FOX2	0.408401	2.8736	0.0120816	0.0220547		1.32721
orf19.6411	CR_08430W_A		0.407479	5.50973	1.52384e-07	6.02036e-07		1.32637
orf19.4201	C6_00570C_A	NHX1	0.40735	6.18595	1.86711e-09	9.13481e-09		1.32625
orf19.562	CR_05250C_A	FGR13	0.407252	4.80632	2.0685e-06	7.03678e-06		1.32616
orf19.4606	C4_01870C_A	ERG8	0.406831	6.12181	9.23774e-10	4.67019e-09		1.32577
orf19.415			0.406443	6.67488	8.1265e-11	4.58375e-10		1.32541
orf19.867	C2_03530W_A		0.40627	5.64666	2.96372e-08	1.2792e-07		1.32526
orf19.4191.1	C4_00500W_A		0.405712	3.19215	0.00230344	0.00486342		1.32474
orf19.1490	C2_01780W_A	MSB2	0.405307	7.69644	1.36312e-09	6.75988e-09		1.32437
orf19.4403	C4_05910C_A	VPS11	0.405155	3.65013	0.00103605	0.00233079		1.32423
orf19.780			0.404398	3.40602	0.00144668	0.00315576		1.32354
orf19.4321	C5_02960C_A		0.403837	1.77229	0.0482184	0.0765105		1.32302
orf19.3980	C5_04920C_A		0.403572	6.56732	1.0168e-09	5.1215e-09		1.32278
orf19.1036			0.403155	5.45698	1.02008e-07	4.12872e-07		1.3224
orf19.3644	C6_00800C_A		0.401617	5.90988	5.20961e-09	2.43532e-08		1.32099
orf19.974	C5_00220W_A	ROT2	0.401603	5.55448	8.3255e-08	3.41271e-07		1.32097
orf19.1055			0.401103	6.32734	9.18826e-09	4.18921e-08		1.32052
orf19.3615	C2_08620W_A		0.401055	0.772243	0.196828	0.263467		1.32047
orf19.1734	CR_04720C_A		0.400581	6.03671	5.6418e-06	1.81522e-05		1.32004
orf19.1169	C1_11510C_A		0.400567	3.52848	0.000981714	0.00222137		1.32003
orf19.4778	C1_09200W_A	LYS142	0.400363	2.52532	0.0207635	0.0359786		1.31984
orf19.318	C3_03190C_A		0.400266	5.91223	8.65892e-09	3.95961e-08		1.31975
orf19.1604	C2_09460C_A		0.400192	6.96845	2.95887e-10	1.57768e-09		1.31968
orf19.1887	C2_07440C_A		0.399871	2.56881	0.015002	0.0268825		1.31939
orf19.4382	CR_03600C_A		0.398979	5.21143	3.1894e-05	9.21382e-05		1.31857
orf19.5260	C1_12050W_A	RPN2	0.398895	8.00736	3.53535e-11	2.08681e-10		1.3185
orf19.6538	C7_01820C_A	VMA11	0.397392	5.50776	3.05621e-07	1.1564e-06		1.31712
orf19.4316	C5_02920W_A		0.396171	2.6875	0.0468825	0.074564		1.31601
orf19.4609	C4_01840C_A		0.3957	4.39298	4.38951e-05	0.000124373		1.31558
orf19.1027			0.39496	2.80825	0.0480686	0.0763171		1.31491
orf19.6072			0.394841	3.51524	0.000769245	0.00176697		1.3148
orf19.5463	C3_00110C_A	SEC6	0.394187	7.37777	3.36466e-08	1.44427e-07		1.3142
orf19.2463			0.394153	3.4277	0.00104964	0.00235748		1.31417
orf19.321	C3_03230C_A		0.393697	3.02937	0.00552311	0.0107932		1.31376
orf19.4370	CR_03710C_A		0.393661	4.09977	7.64688e-05	0.000206284		1.31372
orf19.7207	C1_14000C_A	DOA4	0.393488	4.26378	0.000150295	0.0003891		1.31357
orf19.7216	C1_14100W_A	YPT52	0.393456	5.14752	6.15695e-05	0.00016927		1.31354
orf19.3667			0.393206	0.443295	0.253978	0.327908		1.31331
orf19.1265	C4_05790W_A		0.393116	4.63107	3.08125e-05	8.92499e-05		1.31323
orf19.4441	C1_07260C_A		0.393054	3.97475	0.000595438	0.00139652		1.31317
orf19.3438	C6_01460C_A		0.392947	6.4844	1.12403e-09	5.63044e-09		1.31307
orf19.4197	C6_00600C_A	YHM2	0.391986	6.93681	7.34944e-07	2.64174e-06		1.3122
orf19.1279	C5_04100W_A	CDS1	0.391927	5.48564	6.81482e-07	2.46091e-06		1.31214
orf19.6688	C7_03560W_A		0.391711	5.52433	9.07988e-07	3.22341e-06		1.31195
orf19.225	C2_08850C_A		0.391511	4.67862	1.02656e-05	3.18829e-05		1.31177
orf19.4317	C5_02930C_A	GRE3	0.391416	1.24818	0.122184	0.173459		1.31168
orf19.6871	C2_05580W_A		0.391322	6.56202	1.37478e-09	6.7992e-09		1.31159
orf19.4686	C4_01020C_A		0.391156	5.52157	6.48867e-07	2.35716e-06		1.31144
orf19.5124	C7_03290C_A	RBR3	0.3911	3.33335	0.00244933	0.00514558		1.31139
orf19.7078	C7_00420C_A		0.390398	2.21092	0.0380362	0.061864		1.31076
orf19.491	CR_04080C_A		0.390015	7.92034	4.17234e-11	2.4522e-10		1.31041
orf19.137	C6_01300W_A		0.389722	2.07406	0.0579426	0.0900304		1.31014
orf19.6790	C3_07100C_A		0.389413	2.90151	0.0191997	0.033535		1.30986
orf19.2923	C4_06140C_A		0.389119	3.81265	0.000785484	0.00180351		1.30959
orf19.5842	C2_02650C_A		0.388899	3.09267	0.00615192	0.0118943		1.30939
orf19.4807	C1_09440W_A		0.388744	3.20352	0.00945281	0.0176815		1.30925
orf19.1711	C3_01400W_A	END3	0.388083	3.88153	0.000549741	0.00129882		1.30865
orf19.5525	C6_02560W_A		0.387642	3.25422	0.00830389	0.0156883		1.30825
orf19.7661	CR_10720W_A	HMI1	0.387288	4.348	0.000942105	0.00213795		1.30793
orf19.7491	CR_00410W_A	RTT109	0.387205	3.67514	0.000630948	0.001476		1.30786
orf19.433			0.386801	4.22295	0.00026556	0.000659372		1.30749
orf19.3954	C5_04680W_A	PSD2	0.386746	4.98097	1.03051e-05	3.19873e-05		1.30744
orf19.4969	C1_13420C_A	KEM1	0.386074	6.7268	2.98987e-09	1.42823e-08		1.30683
orf19.5543	C6_02720C_A		0.38548	3.46648	0.00747911	0.0142484		1.30629
orf19.24	C2_06470W_A	RTA2	0.385426	4.18777	0.000382973	0.000931833		1.30625
orf19.5411	C3_00520W_A		0.385229	3.74409	0.000525174	0.00124672		1.30607
orf19.1525	C2_02090W_A		0.385144	4.1038	0.000213705	0.000539698		1.30599
orf19.5383	C3_00720W_A	PMA1	0.383913	11.2179	8.79947e-07	3.12794e-06		1.30488
orf19.1158	C1_11620W_A		0.383008	0.761084	0.168319	0.230382		1.30406
orf19.5322	C2_10470C_A		0.382956	5.51336	2.32142e-06	7.85801e-06		1.30401
orf19.4063			0.381791	1.75418	0.0739459	0.111593		1.30296
orf19.7163	C7_04120W_A		0.381627	1.89434	0.0702785	0.106826		1.30281
orf19.1198	C6_00360C_A		0.381547	3.29542	0.00619331	0.0119616		1.30274
orf19.6986	C3_05510W_A		0.381438	1.83418	0.0563657	0.0878551		1.30264
orf19.3967	C5_04810W_A	PFK1	0.381236	6.16603	0.000102276	0.000270951		1.30246
orf19.7558	CR_09860W_A	YTA6	0.380986	5.55835	1.58579e-06	5.48695e-06		1.30223
orf19.5105	C1_08270C_A	MED15	0.380858	7.11155	2.80508e-09	1.34585e-08		1.30212
orf19.3009			0.379781	2.17117	0.0444091	0.0712529		1.30114
orf19.4227	C5_02200W_A		0.379533	0.895212	0.192377	0.258332		1.30092
orf19.3937	C5_04520W_A	TIP41	0.379512	3.50913	0.0034147	0.00698287		1.3009
orf19.6443	CR_08670C_A		0.379499	1.20952	0.154847	0.213771		1.30089
orf19.3436	C6_01480W_A		0.378404	1.15202	0.17344	0.236391		1.2999
orf19.2075	C2_00520W_A	DFG5	0.37827	5.5214	3.29142e-06	1.09514e-05		1.29978
orf19.5269	C1_11970C_A		0.378105	4.8948	2.80717e-05	8.19633e-05		1.29963
orf19.3038			0.37777	6.2062	0.00439807	0.00878006		1.29933
orf19.1333	C7_03420C_A	SNG3	0.37776	3.27456	0.0076652	0.0145673		1.29932
orf19.2686	C4_03050C_A		0.377203	4.00519	0.00193383	0.00413743		1.29882
orf19.5148	C7_03070C_A	CYR1	0.37715	7.41973	4.24741e-10	2.22135e-09		1.29877
orf19.4505	C2_04470W_A	ADH3	0.376708	0.781515	0.208722	0.278024		1.29838
orf19.6373	CR_08120C_A	DCP2	0.376042	7.24271	3.30424e-10	1.74648e-09		1.29778
orf19.7368	C3_05880C_A		0.375748	6.91299	4.58302e-09	2.15347e-08		1.29751
orf19.7518	CR_00170W_A	ZCF38	0.375746	4.10304	0.000968318	0.00219287		1.29751
orf19.7572	CR_09980W_A	SPT7	0.375505	6.07105	1.01736e-08	4.59453e-08		1.29729
orf19.7260	C1_14430C_A		0.375272	4.76366	0.000356176	0.00087051		1.29708
orf19.7156	C7_04180W_A	FAA2-3	0.374446	3.12258	0.00464604	0.00923793		1.29634
orf19.104	C6_01020W_A		0.374195	0.329506	0.268275	0.343581		1.29612
orf19.4356	CR_03850W_A	HGT3	0.374169	1.71789	0.186829	0.25206		1.29609
orf19.6479	C7_02320W_A	SEC1	0.373947	5.25244	0.000161434	0.000416358		1.29589
orf19.3289			0.373871	4.60108	0.00424133	0.00849511		1.29583
orf19.2458			0.373794	4.1592	0.000582691	0.00136956		1.29576
orf19.3869	CR_06140W_A		0.372828	5.96141	2.11201e-06	7.17137e-06		1.29489
orf19.7580	CR_10040W_A		0.37269	4.35085	0.000281847	0.000697906		1.29477
orf19.2129	C6_04440C_A		0.372191	5.47319	5.54944e-07	2.03219e-06		1.29432
orf19.1686	C3_01570W_A		0.372054	2.29983	0.0310198	0.0516208		1.29419
orf19.5196			0.371333	5.62646	1.019e-05	3.16843e-05		1.29355
orf19.4712	C1_07770W_A	FGR6-3	0.371275	1.02962	0.349031	0.430279		1.2935
orf19.1160	C1_11600W_A		0.371016	4.39191	9.54845e-05	0.000253943		1.29326
orf19.5956	C3_04880W_A	PIN3	0.370865	6.57169	1.13955e-06	4.00641e-06		1.29313
orf19.4711	C4_00840W_A		0.370554	4.88875	0.000178104	0.000456335		1.29285
orf19.1383	C2_09690C_A		0.370393	4.52907	0.000225478	0.000566549		1.2927
orf19.6498	C7_02170C_A		0.370265	3.22349	0.0135019	0.0244269		1.29259
orf19.860	C2_03600W_A	BMT8	0.369879	3.89837	0.00162158	0.00351342		1.29224
orf19.5098	C1_08200W_A	NTG1	0.369789	5.32264	2.28628e-05	6.76958e-05		1.29216
orf19.1382	C2_09700W_A	YEA4	0.369415	2.21159	0.0424401	0.0683549		1.29183
orf19.7274	C1_14560C_A		0.369316	5.11263	1.3392e-05	4.08951e-05		1.29174
orf19.2281	C2_07240C_A		0.369064	1.71326	0.120807	0.171801		1.29151
orf19.4909	C1_10380C_A	CBK1	0.3683	6.81672	1.84311e-09	9.03357e-09		1.29083
orf19.2516	C3_01140W_A		0.368163	3.93449	0.0156817	0.0279627		1.29071
orf19.4906	C1_10350C_A		0.3678	6.16074	2.8569e-08	1.23505e-07		1.29038
orf19.753			0.367383	4.81786	1.46773e-05	4.44965e-05		1.29001
orf19.2849	CR_02920C_A	AQY1	0.36733	2.33439	0.0688904	0.105046		1.28996
orf19.5621	C6_03330C_A		0.366701	2.3958	0.0276593	0.0465535		1.2894
orf19.895	C2_03330C_A	HOG1	0.366476	6.84894	2.20268e-07	8.5477e-07		1.2892
orf19.7083	C7_00370W_A	DCC1	0.36497	2.27626	0.0352646	0.0578386		1.28785
orf19.2921	C4_06160W_A		0.364863	2.07556	0.060357	0.0933303		1.28776
orf19.2985			0.364555	4.65002	0.000195038	0.000494846		1.28748
orf19.761			0.364485	5.64727	1.28091e-05	3.92247e-05		1.28742
orf19.6973	C3_05360C_A		0.363443	2.40606	0.0379134	0.0616827		1.28649
orf19.3266	CR_00880W_A		0.363257	2.40707	0.0523044	0.0822292		1.28633
orf19.7231	C1_14220C_A	FTR2	0.362908	9.80423	6.59483e-11	3.7665e-10		1.28602
orf19.2342	C1_10770W_A	SFT2	0.362323	3.48012	0.00205402	0.0043689		1.28549
orf19.4148	C5_01530C_A		0.362278	4.45364	0.000648272	0.00151393		1.28545
orf19.1665	C3_01810C_A	MNT1	0.362175	7.8999	7.382e-08	3.04001e-07		1.28536
orf19.1729	C3_01220W_A		0.362071	1.24649	0.155016	0.21395		1.28527
orf19.7414	C3_06190C_A	ALS6	0.361685	4.49141	0.00139629	0.00305806		1.28493
orf19.4213			0.361566	3.85275	0.0015705	0.00341224		1.28482
orf19.2135	C6_04500C_A	TSM1	0.361069	6.76287	1.66524e-07	6.54116e-07		1.28438
orf19.516	CR_04280C_A		0.360937	4.10705	0.000741039	0.00170576		1.28426
orf19.2410	CR_03150W_A	SYS3	0.359948	5.73138	2.79305e-06	9.37889e-06		1.28338
orf19.482	CR_04000W_A	RPT4	0.359945	6.82319	1.03069e-08	4.65088e-08		1.28338
orf19.4524			0.35959	2.74508	0.0212507	0.0366831		1.28306
orf19.6354	C1_12690C_A		0.359385	0.316757	0.353374	0.434554		1.28288
orf19.7612	CR_10360C_A	CTM1	0.359314	6.17525	1.70949e-06	5.89257e-06		1.28282
orf19.3201	C5_01740C_A	MTLA1	0.359061	3.25341	0.00592333	0.0114849		1.28259
orf19.7400	C3_06320W_A	ALS7	0.358585	4.8365	7.25186e-05	0.0001966		1.28217
orf19.2614	CR_02140W_A	RSR1	0.358441	5.85267	8.07878e-06	2.55711e-05		1.28204
orf19.7611	CR_10350C_A	TRX1	0.358416	4.57382	0.000145507	0.000377779		1.28202
orf19.1381	C2_09710C_A		0.357998	3.4857	0.00317985	0.00655416		1.28165
orf19.5742	C6_03710W_A	ALS9	0.357656	6.01511	5.73039e-06	1.84155e-05		1.28134
orf19.7513	CR_00210W_A	ALK2	0.35756	3.18873	0.00980102	0.018249		1.28126
orf19.847	C2_03750W_A	YIM1	0.357559	5.0526	0.000193539	0.000491729		1.28126
orf19.1464	C2_01560W_A	BMT5	0.357443	4.77727	4.8448e-05	0.000135933		1.28115
orf19.3802	C4_04780W_A	PMT6	0.357231	6.65059	5.735e-09	2.66721e-08		1.28097
orf19.4947	C1_13190W_A		0.357189	5.72869	0.00265847	0.00556139		1.28093
orf19.5097	C1_08190C_A	CAT8	0.357071	4.23058	0.000731098	0.00168501		1.28082
orf19.6512	C7_02050C_A	EXO70	0.356938	3.57389	0.00496929	0.00981633		1.2807
orf19.4910	C1_10400C_A	FGR41	0.356544	3.65291	0.00528188	0.0103775		1.28035
orf19.3231	CR_01230C_A	CDC27	0.356297	2.36605	0.0621679	0.095832		1.28014
orf19.7034	C7_00830C_A		0.355717	6.48108	7.3632e-08	3.03649e-07		1.27962
orf19.5255	C1_12100C_A	PXA2	0.355695	4.35446	0.00127914	0.00282186		1.2796
orf19.3401	C6_01830W_A	CTA1	0.35507	4.66554	0.000140258	0.000365193		1.27905
orf19.5688	C5_00090C_A		0.355053	5.58238	0.000158029	0.000408155		1.27903
orf19.4922	C1_12920C_A		0.354883	3.86084	0.00418928	0.00840319		1.27888
orf19.2233	C2_06820C_A	PRE2	0.354531	5.90459	4.63557e-05	0.000130802		1.27857
orf19.3803	C4_04770C_A	MNN22	0.354246	2.49243	0.0269569	0.0454694		1.27832
orf19.4639	C4_01460C_A		0.353265	3.04079	0.0139923	0.0252471		1.27745
orf19.5601	C6_03150C_A		0.353215	3.56738	0.00727736	0.0138999		1.2774
orf19.3152	C2_06700W_A	AMO2	0.352944	1.74291	0.097407	0.142069		1.27716
orf19.4320	C5_02950C_A		0.3524	0.573523	0.248689	0.322222		1.27668
orf19.4208	C6_00510C_A	RAD52	0.352032	5.57547	1.39342e-06	4.86921e-06		1.27636
orf19.3670			0.351549	9.9219	4.0215e-08	1.70875e-07		1.27593
orf19.7453	C3_06640W_A		0.35113	3.07468	0.0153368	0.0274014		1.27556
orf19.6809	C3_06920W_A		0.349766	3.26707	0.0183425	0.0321613		1.27435
orf19.1522	C2_02050C_A		0.349656	2.86661	0.0165263	0.0292586		1.27426
orf19.6739	C3_07490W_A		0.349553	4.82174	6.03911e-05	0.000166533		1.27417
orf19.2945			0.349526	1.82916	0.10552	0.152417		1.27414
orf19.3952	C5_04670W_A	SRP101	0.34896	6.66303	2.2351e-07	8.66735e-07		1.27364
orf19.6585	C7_01440W_A		0.348782	4.02607	0.000995353	0.00224943		1.27348
orf19.2963			0.348507	2.87405	0.0235166	0.0402257		1.27324
orf19.7239	C1_14290C_A	MDG1	0.348501	7.3602	1.15643e-07	4.63933e-07		1.27324
orf19.1597	C2_09390W_A	ABG1	0.348437	6.08522	2.58222e-05	7.5923e-05		1.27318
orf19.4511	C2_04410W_A		0.348102	1.81975	0.120356	0.171221		1.27288
orf19.7372	C3_05920W_A	MRR1	0.347685	4.59056	0.000124806	0.000327143		1.27252
orf19.1043			0.347565	0.814204	0.220421	0.291122		1.27241
orf19.6306	CR_04870C_A		0.346377	1.37468	0.200202	0.267655		1.27136
orf19.486	CR_04030W_A	NIP100	0.346143	1.90102	0.0774623	0.116353		1.27116
orf19.7001	C3_05650W_A	YCK2	0.345808	7.49487	1.08816e-08	4.90211e-08		1.27086
orf19.5282	C1_11850W_A		0.345638	8.28114	6.95158e-06	2.21186e-05		1.27071
orf19.6385	CR_08210C_A	ACO1	0.345556	12.7514	1.06012e-07	4.27176e-07		1.27064
orf19.1595	C4_03920W_A		0.345404	3.58445	0.00691477	0.0132498		1.27051
orf19.6668	C5_03570W_A		0.34539	5.58017	0.000318553	0.000782763		1.27049
orf19.6629	CR_05830C_A	ISC1	0.345279	2.68864	0.0257805	0.0437147		1.2704
orf19.5214	C2_05940C_A	VPS33	0.344975	3.82768	0.00182016	0.00391416		1.27013
orf19.2039	C2_00850W_A	MSF1	0.344961	6.89593	2.27939e-08	9.95636e-08		1.27012
orf19.5711	C6_03470W_A		0.344853	4.87635	5.5716e-05	0.000154814		1.27002
orf19.4488	C2_04620W_A		0.344345	8.24412	1.55534e-08	6.91543e-08		1.26957
orf19.2113	C2_00190C_A		0.34405	6.5588	8.74498e-07	3.11059e-06		1.26931
orf19.3312			0.343909	7.02236	2.04736e-08	8.99322e-08		1.26919
orf19.2344	C1_10740C_A	ASR1	0.343719	2.31111	0.0591734	0.0917339		1.26902
orf19.2752	C4_02500C_A	ADR1	0.342934	4.00032	0.00284083	0.00590668		1.26833
orf19.5155	C7_03060C_A	CHS6	0.342239	4.81106	0.000209097	0.000529009		1.26772
orf19.3128	C4_06810C_A		0.342068	6.18148	2.44232e-07	9.38428e-07		1.26757
orf19.6348	C1_12740W_A		0.341814	4.56934	0.000416993	0.00100877		1.26735
orf19.3482	C6_02410W_A		0.34173	4.13103	0.00478269	0.00948546		1.26728
orf19.1339	C7_03360W_A	CPY1	0.341574	3.77869	0.00668773	0.0128459		1.26714
orf19.5292	C4_04170C_A	AXL2	0.34155	5.73263	2.50825e-05	7.38278e-05		1.26712
orf19.3839	C4_04470W_A	SAP10	0.341503	3.80215	0.00407135	0.0081877		1.26708
orf19.287	C3_02940C_A	NUO2	0.341305	8.91493	4.07215e-07	1.51661e-06		1.2669
orf19.3014			0.341115	9.23131	2.37202e-09	1.14612e-08		1.26674
orf19.6741	C3_07470W_A		0.340191	1.91987	0.074874	0.112869		1.26592
orf19.7629	CR_10510W_A		0.339832	4.20683	0.00130681	0.00287941		1.26561
orf19.593	CR_08030C_A	FGR32	0.339638	6.30746	3.93752e-07	1.4685e-06		1.26544
orf19.413			0.339562	2.09035	0.0692005	0.105452		1.26537
orf19.4032	C5_05380W_A	RPN5	0.338347	5.59326	3.6188e-05	0.000104048		1.26431
orf19.5269.1	C1_11960C_A		0.338268	1.59866	0.197403	0.264172		1.26424
orf19.3007			0.337554	1.62342	0.1257	0.177896		1.26361
orf19.1140	C1_11760C_A		0.337389	5.41246	0.000267216	0.000663182		1.26347
orf19.5054	C1_07840W_A		0.336927	4.05928	0.00567959	0.0110476		1.26306
orf19.4315	C5_02910C_A	GYP8	0.33681	3.27166	0.0072873	0.0139121		1.26296
orf19.6698	C7_03640C_A		0.33642	4.98233	0.000162646	0.000419286		1.26262
orf19.3365	C4_03380C_A	DAO2	0.336364	4.89827	0.000226791	0.000569585		1.26257
orf19.2863.1	CR_03010C_A	ERV1	0.335834	5.31431	3.088e-05	8.93982e-05		1.26211
orf19.200	C2_09040W_A		0.335095	5.8398	7.19566e-06	2.28686e-05		1.26146
orf19.3663			0.334799	5.75118	5.81386e-06	1.86593e-05		1.2612
orf19.4184	C4_00590C_A		0.3343	5.8035	3.757e-06	1.23947e-05		1.26077
orf19.1519	C2_02040W_A		0.334061	5.13062	7.05326e-05	0.000191501		1.26056
orf19.589	CR_08060C_A	VPS21	0.333559	5.53804	1.61561e-05	4.86554e-05		1.26012
orf19.1264	C4_05780C_A	CFL2	0.333364	8.56097	4.27384e-09	2.01861e-08		1.25995
orf19.6778	C3_07230W_A		0.333333	5.97412	3.39558e-06	1.12747e-05		1.25992
orf19.7049	C7_00700W_A	CYB5	0.332954	6.56256	1.13062e-07	4.54254e-07		1.25959
orf19.5343	C2_10660W_A	ASH1	0.3328	3.7301	0.0183892	0.0322225		1.25946
orf19.6293	CR_07590W_A	EMP24	0.332381	7.16022	1.02214e-05	3.17636e-05		1.25909
orf19.7067	C7_00520W_A		0.33209	8.44296	9.12557e-08	3.72946e-07		1.25884
orf19.4102	C2_06150C_A	RPN10	0.332084	6.14769	7.57587e-07	2.71597e-06		1.25883
orf19.345	C3_03470W_A		0.331825	2.02046	0.087275	0.129419		1.2586
orf19.2125	C6_04420W_A		0.331761	4.97332	0.00105597	0.00236974		1.25855
orf19.7295	CR_08980C_A		0.331522	5.2113	3.28692e-05	9.49051e-05		1.25834
orf19.398	C1_08530W_A		0.33147	0.510565	0.410192	0.49169		1.2583
orf19.7286	CR_08910C_A	RPN7	0.331411	5.8763	1.39126e-06	4.86628e-06		1.25824
orf19.5369	C2_10860C_A		0.330981	7.99281	1.19459e-06	4.19451e-06		1.25787
orf19.6148	CR_07220C_A		0.3309	0.885989	0.301483	0.379197		1.2578
orf19.6817	C3_06850W_A	FCR1	0.330843	4.53597	0.00043578	0.00104956		1.25775
orf19.2711.1	C4_02840C_A	MED20	0.330802	3.3289	0.0107471	0.0198509		1.25771
orf19.3183	C5_01890W_A		0.330564	4.2493	0.00253275	0.00531468		1.25751
orf19.6092			0.330165	7.64053	1.13344e-07	4.55042e-07		1.25716
orf19.3939	C5_04550W_A		0.329721	3.82994	0.00220072	0.00465915		1.25677
orf19.2748	C4_02530W_A	ARG83	0.329676	4.09243	0.00653625	0.0125839		1.25673
orf19.1715	C3_01360C_A	IRO1	0.329032	4.5938	0.000531689	0.00126109		1.25617
orf19.7297	CR_09010C_A		0.328628	3.25731	0.0275092	0.0463437		1.25582
orf19.441			0.328478	7.09054	2.0983e-06	7.12927e-06		1.25569
orf19.6134	CR_07350W_A		0.328122	4.65028	0.00158011	0.00343038		1.25538
orf19.5910	C3_04540C_A		0.328119	5.60593	5.21438e-05	0.000145629		1.25538
orf19.7487	CR_00470W_A		0.327438	5.95397	0.00175977	0.00378901		1.25478
orf19.5837	C2_02700C_A		0.327436	3.33083	0.0123143	0.0224569		1.25478
orf19.6469	C7_02420C_A		0.327005	3.66436	0.0102617	0.0190121		1.25441
orf19.7547	CR_09750C_A		0.326921	1.59259	0.129756	0.182924		1.25433
orf19.1914	C2_00080C_A	FAV3	0.326742	4.2434	0.00167604	0.0036271		1.25418
orf19.3415	C6_01710C_A	PTK2	0.32604	6.35678	1.67113e-05	5.01889e-05		1.25357
orf19.4153	C5_01590W_A		0.325968	2.21326	0.0762069	0.114752		1.2535
orf19.5643	C4_00180W_A	ECM7	0.325738	5.3097	3.33846e-05	9.62915e-05		1.25331
orf19.1177	C6_00190W_A		0.32409	5.6131	1.29933e-05	3.97218e-05		1.25187
orf19.1224	C2_06680W_A	FRP3	0.324051	3.39011	0.0277414	0.046663		1.25184
orf19.3031			0.32388	6.71265	2.92561e-07	1.11007e-06		1.25169
orf19.2088	C2_00430C_A	DPB4	0.323673	4.52465	0.00155229	0.00337534		1.25151
orf19.775			0.3236	0.725494	0.274951	0.350347		1.25145
orf19.1588	C2_02620W_A		0.323321	4.80298	0.000375268	0.000914716		1.25121
orf19.3168	C5_02030W_A	RPN8	0.322927	6.29585	9.62459e-07	3.41014e-06		1.25087
orf19.7250	C1_14350W_A		0.322571	5.86655	2.91125e-05	8.48209e-05		1.25056
orf19.2411	CR_03140C_A	SYN8	0.3225	2.63703	0.0321276	0.0533181		1.2505
orf19.1150	C1_11690W_A		0.322497	4.64491	0.000662922	0.00154418		1.25049
orf19.757			0.32201	4.73998	0.000424642	0.001025		1.25007
orf19.7076	C7_00440C_A	GBP2	0.322006	9.0213	5.36059e-08	2.24111e-07		1.25007
orf19.6981	C3_05430W_A		0.321969	2.96007	0.0179293	0.0315076		1.25004
orf19.2803	C3_04060C_A	HEM13	0.321459	6.9695	3.72595e-05	0.000106903		1.24959
orf19.2982			0.321159	2.23599	0.0697496	0.10617		1.24933
orf19.5225	C1_12400C_A		0.321094	3.51793	0.0135512	0.024508		1.24928
orf19.394	C1_08490W_A		0.321061	5.64784	2.85978e-05	8.34102e-05		1.24925
orf19.7020	C7_00940W_A		0.320047	6.45609	4.61209e-07	1.70725e-06		1.24837
orf19.3425	C6_01620W_A		0.319875	4.97843	0.000176427	0.000452461		1.24822
orf19.3242	CR_01120C_A		0.319834	5.35851	0.000194729	0.000494292		1.24819
orf19.2591	CR_01920W_A		0.319821	0.825584	0.26622	0.341452		1.24818
orf19.326	C3_03270W_A		0.318893	2.48096	0.0456264	0.0728634		1.24737
orf19.997	C1_10530W_A	SNL1	0.31871	5.04552	0.000510434	0.00121437		1.24721
orf19.6017			0.318423	1.71304	0.160733	0.22117		1.24697
orf19.3054			0.318179	6.98524	2.37694e-07	9.15241e-07		1.24676
orf19.5320	C2_10450W_A	NCE4	0.31809	3.17459	0.0128107	0.0232845		1.24668
orf19.6734	C3_07560W_A	TCC1	0.317723	8.14768	1.52184e-06	5.28575e-06		1.24636
orf19.1759	C2_10220C_A	PHO23	0.317714	5.56931	2.30612e-05	6.82461e-05		1.24635
orf19.6400	CR_08330W_A		0.317627	4.71272	0.00260964	0.00546553		1.24628
orf19.6912	C7_01320W_A		0.317611	4.04543	0.00396346	0.00799133		1.24626
orf19.242.2	C3_02530W_A		0.317241	0.883167	0.361293	0.442896		1.24595
orf19.3929	C5_04420W_A		0.317102	3.90392	0.0177167	0.031174		1.24583
orf19.6165	C3_00880W_A	KGD1	0.317043	9.89754	2.24007e-07	8.67813e-07		1.24577
orf19.91	C6_00900C_A		0.316835	3.82138	0.00404012	0.00813687		1.24559
orf19.4713	C1_07780W_A		0.316533	5.47128	8.71149e-05	0.000233504		1.24533
orf19.393	C1_08480C_A	APS3	0.316443	4.514	0.00159967	0.00347145		1.24526
orf19.6324	C6_00130C_A	VID27	0.316405	7.06575	1.17251e-05	3.6169e-05		1.24522
orf19.3328			0.316146	5.19821	0.00012333	0.000323585		1.245
orf19.4013	C5_05200C_A		0.316124	2.88804	0.0646487	0.0993196		1.24498
orf19.3613	C2_08630C_A		0.315844	5.5786	5.32069e-05	0.000148371		1.24474
orf19.7670	CR_10800C_A		0.315836	6.36055	3.0807e-05	8.92499e-05		1.24473
orf19.1442	C2_01380W_A	PLB4.5	0.315308	2.05038	0.0960327	0.140348		1.24428
orf19.313	C3_03140C_A	DAL4	0.314724	2.9187	0.0317132	0.0527266		1.24377
orf19.5575	C6_02970C_A		0.31442	6.44494	1.4663e-06	5.1026e-06		1.24351
orf19.3310			0.314096	0.844714	0.305391	0.383406		1.24323
orf19.341	C3_03440C_A		0.314095	4.40555	0.00169745	0.00366945		1.24323
orf19.4036	C5_05400W_A	APM1	0.314059	5.96113	3.55967e-05	0.000102455		1.2432
orf19.4423			0.313751	5.62815	1.44892e-05	4.39996e-05		1.24294
orf19.3821	C4_04600C_A		0.313203	4.22819	0.00278896	0.00580768		1.24246
orf19.5692	C5_00060C_A		0.31238	6.06917	0.000100839	0.000267402		1.24175
orf19.4795	C1_09340C_A		0.312304	0.824971	0.316678	0.395847		1.24169
orf19.3007.2			0.311998	0.705081	0.364015	0.445333		1.24143
orf19.2605	CR_02040W_A	PRK1	0.311647	6.47725	8.73977e-07	3.11059e-06		1.24112
orf19.5943	C3_04800C_A		0.311528	2.73351	0.0384595	0.0624967		1.24102
orf19.372	C4_00060W_A		0.31128	4.74774	0.00188574	0.00404086		1.24081
orf19.6077			0.311133	2.24395	0.0714654	0.108269		1.24068
orf19.3173	C5_01980C_A		0.311115	5.07195	0.00013624	0.00035558		1.24067
orf19.1299	C4_03790W_A	RPN6	0.309937	4.37516	0.00205251	0.00436852		1.23965
orf19.2677	C4_03130W_A		0.309922	6.0285	2.20281e-05	6.53659e-05		1.23964
orf19.2026	C2_00970C_A	UBP13	0.309758	6.0042	4.06327e-05	0.00011579		1.2395
orf19.3066			0.309706	4.62049	0.00481868	0.00954189		1.23945
orf19.4723	C1_08650C_A	FAD1	0.309331	3.17743	0.0328803	0.0544019		1.23913
orf19.3133	C4_06760W_A	GUT2	0.30902	9.10121	3.99504e-08	1.69883e-07		1.23887
orf19.5201.1			0.308905	6.63226	1.7073e-05	5.12191e-05		1.23877
orf19.4368	CR_03690W_A		0.305953	0.981233	0.289326	0.365675		1.23624
orf19.7164	C7_04110W_A	ENV7	0.305924	3.94306	0.00442251	0.00882562		1.23621
orf19.3013			0.305716	6.71566	3.41494e-06	1.13209e-05		1.23603
orf19.5984	C3_05110W_A		0.305537	4.64237	0.0020019	0.00426801		1.23588
orf19.6393	CR_08290W_A		0.305225	5.20454	0.000683138	0.00158586		1.23561
orf19.4332	C5_03040W_A		0.305	4.62653	0.00137976	0.00302671		1.23542
orf19.6480	C7_02310C_A		0.304467	1.56834	0.204878	0.273304		1.23496
orf19.1451	C2_01470W_A	SRB9	0.303955	5.95377	1.07366e-05	3.32322e-05		1.23452
orf19.1387	C2_09670C_A		0.303886	4.9828	0.00126401	0.00279299		1.23447
orf19.5449	C3_00210C_A		0.303833	0.715451	0.349342	0.430333		1.23442
orf19.1630	C3_02160C_A		0.303707	6.15302	5.81285e-06	1.86593e-05		1.23431
orf19.2459			0.303377	5.56317	5.54923e-05	0.000154271		1.23403
orf19.5204	C2_05810W_A		0.302997	2.19644	0.123238	0.174639		1.2337
orf19.7235	C1_14250C_A		0.302878	5.10168	0.000129503	0.000338644		1.2336
orf19.651	CR_05020W_A	LYP1	0.302698	0.916105	0.292073	0.368381		1.23345
orf19.1386	C2_09680W_A		0.301843	3.71599	0.00731908	0.0139679		1.23272
orf19.2419	CR_03070W_A	DOM34	0.301728	6.60357	1.6452e-06	5.68086e-06		1.23262
orf19.1110	C5_03840W_A		0.301403	1.08083	0.269828	0.345026		1.23234
orf19.652	CR_05010W_A		0.301121	3.39596	0.0210647	0.0364082		1.2321
orf19.349	C3_03510C_A		0.300853	2.28238	0.0696929	0.106114		1.23187
orf19.4444			0.299972	3.99435	0.0198198	0.0344748		1.23112
orf19.305	C3_03080W_A		0.29965	3.72932	0.00842423	0.0159047		1.23085
orf19.6993	C3_05580C_A	GAP2	0.299631	1.39724	0.25529	0.329212		1.23083
orf19.2192	C2_07900W_A	GDH2	0.299276	10.267	5.85842e-07	2.1396e-06		1.23053
orf19.844	C2_03770C_A	STE11	0.298528	4.89798	0.000508793	0.00121099		1.22989
orf19.5378	C3_00770C_A	SCL1	0.298511	6.06362	4.14828e-05	0.000118028		1.22987
orf19.4134	C5_01440C_A		0.297683	2.19436	0.148122	0.205474		1.22917
orf19.451	CR_06000W_A	SOK1	0.297672	7.67528	1.2289e-05	3.7759e-05		1.22916
orf19.945	C5_00440C_A	VPS2	0.297486	4.27844	0.0050802	0.0100137		1.229
orf19.4831	C1_09680W_A	MTS1	0.297376	9.35836	5.26667e-07	1.93643e-06		1.22891
orf19.6250			0.297075	7.81486	5.28919e-06	1.7068e-05		1.22865
orf19.7678	CR_10850C_A	ATP16	0.297064	10.028	2.10099e-05	6.24804e-05		1.22864
orf19.5595	C6_03100W_A	SHE3	0.297008	6.85013	3.00982e-05	8.73665e-05		1.22859
orf19.3319			0.296937	5.18785	0.000297077	0.00073296		1.22853
orf19.5735	C6_03660C_A	CDC50	0.296815	5.47563	9.94593e-05	0.000264385		1.22843
orf19.2664	C4_03290W_A		0.296609	5.67855	0.00037233	0.000907959		1.22825
orf19.6621	CR_05920C_A	MHP1	0.295731	5.97666	9.95728e-05	0.000264558		1.22751
orf19.6117	CR_07480W_A		0.295206	3.46254	0.0216491	0.0373119		1.22706
orf19.1712	C3_01390C_A	GEA2	0.294886	5.16265	0.000192461	0.000489672		1.22679
orf19.5620	C6_03320W_A		0.294138	1.09928	0.285211	0.361388		1.22615
orf19.2313	C1_11010C_A		0.293703	3.9672	0.00559271	0.0109058		1.22578
orf19.1907	C2_00120C_A	EMC9	0.293565	8.36946	5.01619e-06	1.62446e-05		1.22567
orf19.3023			0.293564	5.52118	0.000453639	0.00108921		1.22566
orf19.5686	C5_00100C_A		0.293437	1.9422	0.164464	0.225825		1.22556
orf19.4162	C4_00790C_A	MLH1	0.293285	0.549276	0.353097	0.434312		1.22543
orf19.5534	C6_02640C_A		0.293101	3.65058	0.0124031	0.0225962		1.22527
orf19.5184	C7_02780W_A		0.292615	7.66188	4.46927e-06	1.45772e-05		1.22486
orf19.190	C2_04770W_A		0.292064	4.91739	0.00458181	0.00911354		1.22439
orf19.2749	C4_02520C_A		0.291992	3.91728	0.00597575	0.0115783		1.22433
orf19.7544	CR_00020W_A	TLO1	0.291769	5.14098	0.0031561	0.00651505		1.22414
orf19.1936	C5_01320W_A	SNF1	0.291655	7.18368	6.03036e-06	1.92887e-05		1.22404
orf19.1336	C7_03390C_A	PUP3	0.291436	4.91552	0.000822363	0.00188422		1.22386
orf19.7111	C7_00120W_A		0.290737	4.15	0.0106245	0.0196377		1.22327
orf19.4916	C1_12860C_A		0.290583	2.45958	0.101624	0.147492		1.22313
orf19.6944	C3_03730C_A	PHB1	0.290474	5.20253	0.00157534	0.00342137		1.22304
orf19.1805	CR_04930W_A	PEX14	0.290474	5.52146	0.00018539	0.000473446		1.22304
orf19.4456			0.2899	11.1501	2.93801e-07	1.114e-06		1.22256
orf19.4642	C4_01430C_A		0.288414	3.19363	0.0449291	0.0719393		1.2213
orf19.5871	C3_04290C_A	SNF5	0.288201	6.02007	6.97056e-05	0.000189632		1.22112
orf19.4251	C5_02430W_A	ZCF22	0.288057	1.15712	0.312475	0.39149		1.22099
orf19.522	CR_04340W_A	PIM1	0.28804	8.6133	3.19275e-07	1.20473e-06		1.22098
orf19.3366	C4_03390W_A	CSH3	0.287834	6.5419	4.80201e-05	0.000134941		1.22081
orf19.5468	C3_00050C_A		0.2878	0.61156	0.489317	0.570383		1.22078
orf19.2799			0.287724	4.72438	0.00272616	0.00569427		1.22071
orf19.7179	C7_04010W_A	SSQ1	0.287236	5.9247	6.30501e-05	0.000173166		1.2203
orf19.3780	C4_05000W_A		0.286934	1.52164	0.21288	0.282454		1.22004
orf19.7438	C3_06500W_A	UBA1	0.28672	7.33021	1.79742e-06	6.17617e-06		1.21986
orf19.3035			0.28659	8.20496	1.39913e-06	4.88444e-06		1.21975
orf19.736	C4_05090C_A	SRB8	0.286508	3.73451	0.0175632	0.0309339		1.21968
orf19.3359			0.286457	5.53295	9.37915e-05	0.000249928		1.21964
orf19.2229	C2_06780C_A		0.28612	3.47546	0.0469129	0.0745908		1.21936
orf19.5508	C7_03690W_A		0.285907	0.388846	0.430974	0.511436		1.21918
orf19.6694	C7_03620C_A		0.285861	5.70318	9.33303e-05	0.00024882		1.21914
orf19.2111	C2_00220C_A		0.285714	6.22883	5.8906e-05	0.000162849		1.21901
orf19.2974			0.28551	4.79293	0.00137554	0.00301989		1.21884
orf19.740	C4_05110C_A	HAP41	0.285378	10.3494	6.70401e-07	2.4257e-06		1.21873
orf19.3077	C4_07230C_A	VID21	0.285332	6.54871	9.44731e-05	0.000251621		1.21869
orf19.529	CR_04390C_A		0.284752	5.96662	0.000114444	0.000301138		1.2182
orf19.3959	C5_04730C_A	SSD1	0.284455	8.3408	2.71505e-06	9.14507e-06		1.21795
orf19.6952	C3_03670W_A		0.284432	4.34763	0.00321637	0.00662693		1.21793
orf19.795	C2_04250W_A	VPS36	0.284075	3.74148	0.0170447	0.0300691		1.21763
orf19.5142	C7_03130C_A	DFR1	0.283347	2.95279	0.0526401	0.0827093		1.21701
orf19.6636	CR_05760C_A		0.282962	3.83815	0.0174011	0.0306582		1.21669
orf19.4255	C5_02460C_A	ECM331	0.282571	1.9053	0.193276	0.259475		1.21636
orf19.2443			0.282537	3.84309	0.0154717	0.0276154		1.21633
orf19.5700	C5_00010W_A	TLO11	0.282536	3.10491	0.0897719	0.132295		1.21633
orf19.6437	CR_08630W_A	CDC23	0.282288	4.05395	0.0199536	0.0346743		1.21612
orf19.7585	CR_10100C_A	INO1	0.281861	11.9369	2.91366e-05	8.48459e-05		1.21576
orf19.6049			0.281497	4.71503	0.00423634	0.00848822		1.21546
orf19.3021			0.281478	0.28645	0.463501	0.544357		1.21544
orf19.3775	C4_05030C_A	SSK2	0.281472	7.16206	2.73698e-06	9.21328e-06		1.21543
orf19.1162.1	C1_11570W_A		0.281282	1.63351	0.249876	0.323299		1.21527
orf19.691	C6_02010C_A	GPD2	0.280984	7.97826	3.31844e-05	9.57646e-05		1.21502
orf19.118	C6_01110W_A	FAD2	0.280947	8.43624	1.65122e-05	4.96183e-05		1.21499
orf19.3123.2	C4_06860C_A		0.280547	2.24691	0.153905	0.212848		1.21466
orf19.6027			0.280538	1.89125	0.196742	0.263417		1.21465
orf19.7319	CR_09210W_A	SUC1	0.280131	3.0997	0.0533835	0.0836847		1.21431
orf19.5854	C3_04090W_A	SBP1	0.279979	8.40514	1.96621e-06	6.70549e-06		1.21418
orf19.2172	C2_08130W_A	ARA1	0.279192	0.315323	0.417225	0.497607		1.21351
orf19.1546	C2_02280W_A		0.278597	6.4166	1.23503e-05	3.79047e-05		1.21301
orf19.6838			0.278536	0.598244	0.405899	0.487775		1.21296
orf19.799	C2_04210W_A	STE4	0.278249	2.39675	0.129885	0.18306		1.21272
orf19.4543			0.277726	1.96131	0.168384	0.230382		1.21228
orf19.5325	C2_10530C_A	KIN3	0.277475	5.20893	0.00106888	0.00239479		1.21207
orf19.6445	CR_08690C_A	ECI1	0.277215	2.22094	0.167324	0.229257		1.21185
orf19.1741	CR_04640W_A	DIT1	0.276786	0.315499	0.468364	0.548888		1.21149
orf19.5539	C6_02680W_A		0.276565	1.60265	0.266165	0.341452		1.21131
orf19.1389	C2_09650W_A		0.276309	6.73332	0.000128286	0.000335781		1.21109
orf19.2114	C2_00180C_A		0.276271	1.20591	0.309623	0.388273		1.21106
orf19.3045			0.276116	5.86338	0.000223703	0.000562606		1.21093
orf19.230	C3_02420C_A		0.275958	2.64448	0.141275	0.196977		1.2108
orf19.1377	C2_09730C_A	IPK2	0.275764	3.0241	0.0451323	0.0722222		1.21063
orf19.478	CR_03960C_A		0.275422	2.503	0.081483	0.121756		1.21035
orf19.1847	CR_06860C_A	ARO10	0.275416	2.99986	0.0533246	0.0836164		1.21034
orf19.5602	C6_03160C_A	BMT6	0.273887	5.23728	0.00333465	0.00683454		1.20906
orf19.6893	C2_05800C_A		0.273546	5.71699	0.000242592	0.00060648		1.20877
orf19.6275			0.273522	4.01576	0.00992514	0.0184638		1.20876
orf19.6307	CR_04860C_A		0.273449	0.857254	0.445566	0.525895		1.20869
orf19.4738	C1_08800W_A		0.272893	3.83769	0.0137071	0.0247571		1.20823
orf19.7205	C1_13980C_A	DUR7	0.272362	3.8881	0.0117224	0.0214419		1.20778
orf19.5440	C3_00290W_A	RPT2	0.272002	8.06208	1.62565e-05	4.89039e-05		1.20748
orf19.7308	CR_09120C_A	TUB1	0.271905	7.46345	1.25923e-05	3.85825e-05		1.2074
orf19.192	C2_04750W_A		0.271807	3.31286	0.030026	0.0501658		1.20732
orf19.5823	C2_02830C_A	SGT2	0.271154	7.57151	4.44558e-05	0.000125897		1.20677
orf19.4865	C1_09990W_A	SAC1	0.271063	3.33607	0.0281299	0.0472146		1.2067
orf19.7627	CR_10500C_A		0.270973	3.81213	0.0234183	0.0400701		1.20662
orf19.4430			0.270373	5.5402	0.000210355	0.000531732		1.20612
orf19.4163	C4_00780C_A		0.270234	5.28883	0.000591357	0.00138814		1.206
orf19.6846			0.269522	5.84914	0.000142155	0.000369426		1.20541
orf19.7118	C7_00060C_A		0.269378	4.73759	0.00385898	0.00780372		1.20529
orf19.3928	C5_04410C_A		0.269186	4.38541	0.0168523	0.0297683		1.20513
orf19.5417	C3_00480C_A	DOT5	0.269022	3.10604	0.0547244	0.0855901		1.20499
orf19.5605	C6_03180C_A		0.268657	6.68942	3.56496e-05	0.000102554		1.20469
orf19.1221	C6_04030W_A	ALG2	0.268305	4.14477	0.0128805	0.0234035		1.20439
orf19.6948	C3_03710W_A	CCC1	0.268026	8.15017	4.35211e-06	1.42205e-05		1.20416
orf19.6045			0.267983	6.55401	5.46541e-05	0.000152131		1.20412
orf19.3251	CR_01040C_A	ARC19	0.267839	1.91176	0.270094	0.345285		1.204
orf19.418			0.26737	6.97313	1.19692e-05	3.68804e-05		1.20361
orf19.5521	C6_02520W_A	ISA1	0.267271	8.11179	1.44538e-05	4.39163e-05		1.20353
orf19.2009	C2_01150W_A	PEX12	0.266915	3.54591	0.0688958	0.105046		1.20323
orf19.5714	C6_03490C_A	SAP1	0.266712	1.51818	0.253955	0.327908		1.20306
orf19.1535	C2_02190C_A		0.266285	4.07681	0.0240625	0.0410566		1.20271
orf19.470	CR_03910C_A	TAF12L	0.265524	5.64483	0.00147887	0.00322083		1.20207
orf19.1866	C2_07590W_A	VMA10	0.265447	4.50855	0.104656	0.15129		1.20201
orf19.4337	C5_03080C_A		0.265394	2.75553	0.0830207	0.123764		1.20196
orf19.857	C2_03610W_A	FMO2	0.265083	2.68886	0.107797	0.155296		1.20171
orf19.1718	C3_01330W_A	ZCF8	0.264888	3.63142	0.0791395	0.118611		1.20154
orf19.2498	C3_00940W_A		0.264585	5.577	0.0014361	0.00313645		1.20129
orf19.6059			0.264305	7.80159	8.92654e-05	0.000238916		1.20106
orf19.117	C6_01100W_A	SEC9	0.264219	5.80232	0.00088183	0.00201035		1.20099
orf19.7184	C7_03970C_A		0.26409	3.65257	0.0414406	0.0669426		1.20088
orf19.5576	C6_02980C_A		0.264012	7.12166	3.13744e-05	9.07813e-05		1.20081
orf19.5851	CR_05510W_A	STE13	0.263729	4.66037	0.00328817	0.00675194		1.20058
orf19.4066	C2_09070C_A		0.263628	4.37318	0.0393568	0.0638029		1.20049
orf19.188	C2_04780W_A		0.263502	7.97136	1.14767e-05	3.54628e-05		1.20039
orf19.998	C1_10540C_A		0.262659	4.63393	0.00537368	0.0105313		1.19969
orf19.6040			0.262655	6.15038	0.00138048	0.00302708		1.19968
orf19.1690	C3_01550C_A	TOS1	0.262566	10.3886	2.03984e-06	6.94358e-06		1.19961
orf19.7344	CR_09490W_A		0.261892	3.29826	0.0676073	0.103486		1.19905
orf19.7660	CR_10710C_A	VPS52	0.261484	5.0945	0.00315754	0.00651555		1.19871
orf19.2881	C4_06540W_A	MNN4	0.261324	6.55054	0.000233416	0.000585146		1.19858
orf19.843	C2_03780C_A		0.26124	6.56689	6.89424e-05	0.000187837		1.19851
orf19.2030	C2_00940W_A		0.261234	3.64029	0.0421465	0.067922		1.1985
orf19.2069	C2_00580C_A	SMF3	0.261186	6.52346	0.000145107	0.00037692		1.19846
orf19.3462	C6_02220W_A	SAR1	0.260847	5.96752	0.00519756	0.0102256		1.19818
orf19.7631	CR_10520C_A	SLD5	0.260627	2.59323	0.092868	0.13616		1.198
orf19.105	C6_01030W_A	HAL22	0.260415	5.42335	0.00776717	0.0147418		1.19782
orf19.5825.1	C2_02800W_A		0.260253	3.79108	0.0213413	0.0368163		1.19769
orf19.3311			0.260227	1.47066	0.291956	0.368348		1.19767
orf19.2866	C4_06660W_A		0.260103	4.00171	0.173865	0.236852		1.19756
orf19.5221	C1_12430W_A		0.260037	4.11793	0.0370313	0.0603735		1.19751
orf19.30	C2_06540C_A	SPF1	0.260032	7.62904	0.000215722	0.000544541		1.19751
orf19.384			0.259779	5.33218	0.00239279	0.00503842		1.1973
orf19.7089	C7_00320C_A	PMR1	0.259776	7.73872	1.24386e-05	3.8133e-05		1.19729
orf19.7059	C7_00600C_A		0.259768	4.96451	0.00659612	0.0126947		1.19729
orf19.5665	C4_00380W_A		0.259637	5.36549	0.00137717	0.00302226		1.19718
orf19.3476	C6_02340W_A	HRR25	0.259584	7.78463	1.01731e-05	3.16496e-05		1.19713
orf19.6977	C3_05390C_A	GPI1	0.259472	2.52512	0.173658	0.236629		1.19704
orf19.5089			0.258798	2.83637	0.0915569	0.134454		1.19648
orf19.5031	C1_13930W_A	SSK1	0.258538	8.05645	6.06087e-06	1.93749e-05		1.19627
orf19.3505	C6_02060W_A	SLM2	0.258354	6.42658	4.51903e-05	0.000127712		1.19611
orf19.2724	C4_02740W_A		0.258231	7.80335	2.86816e-05	8.36101e-05		1.19601
orf19.3697	C7_02670W_A		0.257917	1.76067	0.261802	0.336756		1.19575
orf19.3653	C6_00740W_A	FAT1	0.257703	6.38191	0.000175469	0.000450428		1.19557
orf19.6465	C7_02430C_A		0.256795	1.083	0.32262	0.401986		1.19482
orf19.6464	C7_02450W_A		0.256636	4.22003	0.0149532	0.0268126		1.19469
orf19.4568	C4_02220C_A	ZCF25	0.25607	2.34936	0.140762	0.196362		1.19422
orf19.520	CR_04330W_A		0.256033	4.71218	0.010286	0.0190507		1.19419
orf19.2871	C4_06610C_A	SDH12	0.255966	11.3974	3.71098e-05	0.000106586		1.19413
orf19.3471	C6_02300C_A		0.255771	1.61113	0.271611	0.346738		1.19397
orf19.6066			0.255759	3.69148	0.0459559	0.0733253		1.19396
orf19.3181.1	C5_01900C_A		0.255319	0.498161	0.46763	0.548284		1.1936
orf19.5751	C6_03770C_A	ORM1	0.254998	5.21235	0.00362523	0.00736101		1.19333
orf19.6801	C3_07000W_A	RPD31	0.254517	6.39653	0.000179444	0.000459235		1.19294
orf19.3160	C5_02080C_A	HSP12	0.254221	2.40808	0.276026	0.35147		1.19269
orf19.1996	C2_01270W_A	CHA1	0.254117	4.65766	0.0280368	0.0470982		1.19261
orf19.499	CR_04150W_A		0.253657	2.70787	0.133692	0.187843		1.19223
orf19.1092	C6_04340W_A		0.253556	1.52237	0.24956	0.323043		1.19214
orf19.7643	CR_10600C_A		0.253544	7.03823	0.00011029	0.00029091		1.19213
orf19.7378	C3_05970C_A		0.253493	6.08789	0.000165246	0.000425385		1.19209
orf19.1283	C5_04060C_A	MEC1	0.253362	5.66819	0.00106747	0.00239261		1.19198
orf19.2837	CR_02790C_A	ALG5	0.252864	2.96721	0.080668	0.120727		1.19157
orf19.3804	C4_04760C_A		0.252804	3.80731	0.0916918	0.134616		1.19152
orf19.2257	C2_07010W_A		0.252155	7.94442	8.44895e-05	0.000226689		1.19098
orf19.6023			0.251777	2.07906	0.183502	0.248369		1.19067
orf19.7610	CR_10340W_A	PTP3	0.251678	8.17502	0.00116657	0.00259132		1.19059
orf19.3093	C4_07120C_A	MSH2	0.251616	4.02174	0.0306037	0.050975		1.19054
orf19.4861	C1_09930W_A		0.251355	0.2997	0.500438	0.581979		1.19032
orf19.5793	C2_03060W_A	PR26	0.251155	7.24536	6.87262e-05	0.000187435		1.19016
orf19.3190	C5_01830C_A	HAL9	0.250957	5.21404	0.00212876	0.0045173		1.19
orf19.4583	C4_02080W_A		0.250628	2.26269	0.172102	0.234743		1.18973
orf19.7448	C3_06590W_A	LYS9	0.25046	4.18304	0.0823332	0.122926		1.18959
orf19.3648	C6_00770C_A		0.250059	3.56751	0.0504086	0.0795006		1.18926
orf19.7600	CR_10250C_A	FDH3	0.249969	8.56784	2.78661e-05	8.14241e-05		1.18918
orf19.6008.3			0.249902	1.45755	0.31957	0.398915		1.18913
orf19.1970	C5_01000C_A		0.249705	5.99295	0.000682492	0.00158503		1.18896
orf19.2150	C6_04560W_A		0.249658	8.68618	6.02518e-05	0.000166233		1.18893
orf19.487	CR_04040C_A	SPT14	0.249172	3.8006	0.0503576	0.0794519		1.18853
orf19.805	C2_04160W_A		0.249037	5.80621	0.0012114	0.00268435		1.18841
orf19.209	C2_08970C_A	DFG10	0.24883	2.00556	0.240236	0.312903		1.18824
orf19.6529	C7_01920W_A	CDC34	0.248755	6.58494	0.00016927	0.000434923		1.18818
orf19.794	C2_04260W_A	SSN3	0.248251	3.42304	0.100356	0.145924		1.18777
orf19.2891	C4_06430C_A		0.247957	5.0496	0.0109006	0.0200936		1.18752
orf19.6193			0.247703	6.77223	0.00117737	0.00261213		1.18732
orf19.6781	C3_07200C_A	ZFU2	0.247689	3.25492	0.0665393	0.101995		1.1873
orf19.3331			0.247257	7.83346	4.73267e-05	0.000133129		1.18695
orf19.3490	C2_10420W_A	FGR6-4	0.247162	2.36159	0.155917	0.21513		1.18687
orf19.497	CR_04130C_A	EAF7	0.246647	6.32668	0.00443981	0.00885691		1.18645
orf19.4457			0.246249	6.32496	0.00113559	0.00253074		1.18612
orf19.5568	C6_02920C_A	VPS51	0.246245	3.32999	0.0709396	0.107629		1.18612
orf19.3751	CR_02210W_A		0.246054	6.51973	0.000165956	0.00042681		1.18596
orf19.5768	C6_03920W_A	SNF4	0.24589	6.03902	0.000202788	0.000514031		1.18582
orf19.3402	C6_01820C_A	FPG1	0.245871	5.18701	0.00348854	0.00711786		1.18581
orf19.55			0.245593	3.68812	0.0346769	0.0569946		1.18558
orf19.1565	C2_02420C_A		0.245529	5.28759	0.00396172	0.00799077		1.18553
orf19.5489	C2_06270W_A		0.24544	1.54097	0.297978	0.375308		1.18545
orf19.779			0.244097	4.29837	0.016632	0.0294076		1.18435
orf19.1684	C3_01590W_A		0.243937	4.4225	0.0112908	0.0207149		1.18422
orf19.5755	C6_03810W_A		0.24362	4.24536	0.021249	0.0366831		1.18396
orf19.3102	C4_07070W_A	CTA6	0.243511	4.15524	0.0539816	0.0845253		1.18387
orf19.3083	C4_07200C_A		0.243445	4.28056	0.0813088	0.121562		1.18382
orf19.2062	C2_00660C_A	SOD4	0.243165	3.63584	0.108894	0.156629		1.18359
orf19.2915	C4_06230C_A		0.243003	6.10491	0.000703228	0.00162903		1.18345
orf19.4247	C5_02390C_A		0.242867	4.43352	0.0196358	0.0342074		1.18334
orf19.6311	CR_04820W_A		0.242706	0.300672	0.534062	0.613116		1.18321
orf19.916	CR_06560C_A		0.242541	3.67321	0.0584815	0.0907902		1.18307
orf19.5784	C2_03120W_A	AMO1	0.242512	0.886627	0.417186	0.497607		1.18305
orf19.7509.1	CR_00250W_A	ATP17	0.24183	8.96024	0.000319411	0.000784517		1.18249
orf19.4340	C5_03100C_A		0.241183	5.49231	0.00284346	0.00590989		1.18196
orf19.3332			0.240809	5.42045	0.00240518	0.00506256		1.18166
orf19.3973	C5_04870W_A		0.240642	1.57577	0.26936	0.34475		1.18152
orf19.248	C3_02590W_A	APL5	0.240101	5.80567	0.00135313	0.0029733		1.18107
orf19.1311	C4_03670W_A	SPO75	0.240075	5.30068	0.00248054	0.00520914		1.18105
orf19.7428	C3_06430W_A	APN1	0.23993	5.89308	0.00129504	0.00285578		1.18094
orf19.1834	C1_10630C_A		0.239601	3.3084	0.0595572	0.0922503		1.18067
orf19.6254			0.239076	3.371	0.0926292	0.135846		1.18024
orf19.5924	C3_04640W_A	ZCF31	0.238944	3.69405	0.0420114	0.0677243		1.18013
orf19.4845	C1_09800C_A	TVP18	0.238656	2.51033	0.191503	0.257285		1.17989
orf19.6458	C7_02520W_A		0.238646	1.672	0.289303	0.365675		1.17988
orf19.6553	C7_01710W_A		0.238582	4.7078	0.0283092	0.047501		1.17983
orf19.446			0.23856	3.77453	0.171912	0.234542		1.17981
orf19.7637	CR_10570C_A	YHB4	0.238421	4.0211	0.0388398	0.0630209		1.1797
orf19.3080	C4_07220C_A		0.238131	5.61949	0.00241966	0.00508716		1.17946
orf19.993	C1_10500W_A		0.237836	2.06915	0.190378	0.255963		1.17922
orf19.6308	CR_04850C_A		0.237834	0.329228	0.492629	0.573753		1.17922
orf19.4014	C5_05210W_A		0.237722	5.24884	0.00519897	0.0102256		1.17913
orf19.4912	C1_10420C_A		0.237504	4.92478	0.00897864	0.0168581		1.17895
orf19.4603	C4_01890C_A	ARL1	0.237374	5.55973	0.00391214	0.00789367		1.17884
orf19.4404	C4_05920C_A	PGA49	0.23723	2.84604	0.115161	0.164601		1.17873
orf19.1510	C2_01980C_A	SRD1	0.237159	3.62474	0.0532803	0.0836148		1.17867
orf19.3565	C2_05350C_A		0.236699	2.82399	0.108742	0.156456		1.17829
orf19.6008.4			0.236579	6.61934	0.000402241	0.000976104		1.1782
orf19.3635	C2_08450W_A		0.236481	5.48463	0.00359953	0.00731971		1.17812
orf19.7125	C7_00010C_A		0.236388	6.21161	0.000380255	0.000926046		1.17804
orf19.3501	C6_02090C_A		0.236037	5.49225	0.00255053	0.00534994		1.17775
orf19.6033			0.236032	6.13878	0.000516789	0.00122788		1.17775
orf19.6462	C7_02470C_A		0.236	4.53971	0.0105167	0.0194516		1.17772
orf19.4764	C1_09070W_A		0.235396	2.35613	0.200331	0.267762		1.17723
orf19.7520	CR_00150C_A	POT1	0.23538	3.63843	0.0726764	0.109799		1.17722
orf19.4649	C4_01380W_A	ZCF27	0.235324	4.51856	0.0427277	0.0687774		1.17717
orf19.247	C3_02580C_A		0.234828	1.68151	0.301839	0.379558		1.17677
orf19.2515	C3_01130C_A		0.2346	2.92234	0.102914	0.149246		1.17658
orf19.3833	C4_04510W_A		0.234241	5.37711	0.00275434	0.00574654		1.17629
orf19.2697	C4_02960W_A		0.234136	6.43954	0.000408705	0.000990911		1.1762
orf19.5455	C3_00170C_A		0.234	6.05147	0.00141646	0.00309603		1.17609
orf19.422			0.233869	5.39695	0.00870351	0.0163866		1.17598
orf19.4883	C1_10140C_A		0.233781	2.04488	0.222929	0.294008		1.17591
orf19.1170	C1_11500C_A	ARO7	0.23351	4.06827	0.044848	0.0718727		1.17569
orf19.3586	C2_08830W_A		0.233414	5.67919	0.00225229	0.00475726		1.17561
orf19.3997	C5_05050W_A	ADH1	0.233216	10.8795	0.048306	0.076605		1.17545
orf19.6016			0.232917	3.85746	0.0986385	0.143618		1.17521
orf19.1444	C2_01390W_A		0.232161	6.26318	0.00114877	0.00255699		1.17459
orf19.3515	CR_05440W_A		0.231679	2.97445	0.146441	0.203556		1.1742
orf19.291	C3_02970C_A		0.231655	5.79995	0.00999855	0.0185687		1.17418
orf19.6030			0.230983	4.18179	0.056033	0.0873865		1.17363
orf19.5117			0.23088	11.78	0.000138312	0.00036047		1.17355
orf19.4726			0.230792	4.0776	0.025851	0.0437799		1.17348
orf19.2580	CR_01800C_A	HST2	0.230645	2.97302	0.105585	0.152432		1.17336
orf19.2680	C4_03110W_A		0.230639	6.95903	0.000716822	0.0016549		1.17335
orf19.1658	C3_01890C_A		0.230178	7.2676	0.000468867	0.0011238		1.17298
orf19.6557	C7_01670W_A		0.230049	1.53842	0.362289	0.443577		1.17287
orf19.2308	C1_11080W_A		0.229934	5.88821	0.00541639	0.0106074		1.17278
orf19.6456	C7_02540W_A		0.229807	4.71248	0.00994301	0.0184868		1.17268
orf19.1340	C7_03350C_A		0.229571	0.94466	0.474914	0.555253		1.17249
orf19.5069			0.229477	2.88927	0.309958	0.388604		1.17241
orf19.5021	C1_13830C_A	PDX1	0.229245	6.22268	0.000413116	0.00100072		1.17222
orf19.6887	C2_05760C_A		0.229199	7.65804	0.0021887	0.0046373		1.17218
orf19.3544	C2_05130W_A		0.228981	1.71579	0.303685	0.381528		1.17201
orf19.3932	C5_04470C_A		0.228927	2.30441	0.224452	0.295801		1.17196
orf19.6329	C6_00080C_A		0.228618	4.29082	0.0266899	0.0450748		1.17171
orf19.6632	CR_05790C_A	ACO2	0.228177	8.98877	0.000244072	0.000609456		1.17135
orf19.3135	C4_06740C_A		0.227719	5.26622	0.00748878	0.0142596		1.17098
orf19.874	C2_03460C_A		0.227514	5.26296	0.0131699	0.0238896		1.17082
orf19.544.1	CR_04550W_A	PRE6	0.227047	6.64444	0.0010481	0.002355		1.17044
orf19.4956	C1_13300C_A	RPN1	0.226849	7.61254	0.000243322	0.000608026		1.17028
orf19.5288	CR_05340C_A	IFE2	0.226763	6.11646	0.191965	0.257842		1.17021
orf19.7124	C7_00020C_A	RVS161	0.226484	7.0905	0.000879888	0.00200676		1.16998
orf19.5559	C6_02850W_A	RAV2	0.226457	2.99557	0.140566	0.196138		1.16996
orf19.5654	C4_00280W_A	STE24	0.226119	6.37663	0.000753694	0.0017327		1.16968
orf19.3344			0.225439	5.75518	0.0038682	0.00781367		1.16913
orf19.6966	C3_05300C_A		0.225128	2.70831	0.243236	0.315906		1.16888
orf19.2335	C1_10820C_A		0.225024	3.90183	0.0551662	0.0862564		1.1688
orf19.6770	C3_07280C_A		0.224977	3.70895	0.0556255	0.0869184		1.16876
orf19.1889	C2_07420W_A		0.224434	6.68506	0.000649449	0.00151538		1.16832
orf19.6744	C3_07450C_A		0.224032	3.45523	0.0934359	0.136956		1.16799
orf19.3215	C5_03960W_A		0.223813	4.80415	0.0132474	0.0239982		1.16782
orf19.3820	C4_04620C_A		0.223607	3.2967	0.395572	0.477098		1.16765
orf19.3241	CR_01130W_A		0.223201	5.46632	0.00826784	0.0156256		1.16732
orf19.2051	C2_00730C_A		0.222983	6.53653	0.0011685	0.00259456		1.16714
orf19.3782.2	C4_04970C_A		0.222476	5.16451	0.0300541	0.0501974		1.16673
orf19.4967	C1_13410W_A	COX19	0.221853	5.05203	0.0151297	0.0270758		1.16623
orf19.4792			0.221356	7.0098	0.000617535	0.00144586		1.16583
orf19.2581	CR_01810C_A		0.221298	1.12659	0.463268	0.544201		1.16578
orf19.474	CR_03930C_A		0.22122	4.45124	0.0415002	0.067019		1.16572
orf19.7198	C7_03840W_A		0.220681	4.76936	0.0147482	0.0264798		1.16528
orf19.6635	CR_05770W_A		0.220591	3.50731	0.115917	0.165596		1.16521
orf19.906	C2_03240C_A	ROM2	0.220578	7.17595	0.000256259	0.00063831		1.1652
orf19.3591	C2_08800C_A	APE3	0.219749	4.34358	0.031789	0.0528365		1.16453
orf19.5419	C3_00460W_A	ATP5	0.219453	9.23564	0.000508495	0.00121081		1.16429
orf19.3399	C6_01850W_A		0.21929	6.60056	0.00274096	0.00572082		1.16416
orf19.2099	C2_00330C_A	HIR1	0.21905	5.48645	0.00364298	0.0073943		1.16397
orf19.1808	CR_04950W_A	MED5	0.218763	4.09345	0.0762884	0.114823		1.16374
orf19.1070			0.218748	1.75965	0.36159	0.443062		1.16372
orf19.90	C6_00890W_A		0.218597	3.13249	0.198921	0.266073		1.1636
orf19.3726	CR_02410W_A		0.217377	5.8205	0.00189532	0.00405822		1.16262
orf19.4655	C4_01320C_A	OPT6	0.217158	2.60751	0.143614	0.199881		1.16244
orf19.5438	C3_00310C_A		0.216578	4.01249	0.046676	0.0742789		1.16197
orf19.5782	C2_03140C_A		0.21613	4.03771	0.0490305	0.0776411		1.16161
orf19.1195	C6_00340C_A		0.216128	7.3227	0.000596868	0.00139927		1.16161
orf19.2108	C2_00240C_A	SOD6	0.216096	2.86041	0.226721	0.298088		1.16159
orf19.2494			0.215761	4.82688	0.0144674	0.0260355		1.16132
orf19.2908	C4_06280C_A		0.215243	2.33546	0.254209	0.328128		1.1609
orf19.814	C2_04060C_A	SSY1	0.21492	4.61153	0.0325212	0.0538731		1.16064
orf19.3221	CR_01330W_A	CPA2	0.214606	3.4002	0.133364	0.187576		1.16039
orf19.6124	CR_07440W_A	ACE2	0.214591	3.56287	0.113832	0.162958		1.16038
orf19.5757	C6_03820C_A		0.214584	2.75028	0.176798	0.240308		1.16037
orf19.7391	C3_06090C_A	OCH1	0.214571	5.59085	0.0154004	0.0274972		1.16036
orf19.5775	C6_03990C_A		0.214432	1.01058	0.556257	0.633534		1.16025
orf19.4641	C4_01440W_A	NMT1	0.214005	5.59925	0.00825893	0.0156142		1.1599
orf19.6109			0.213885	8.12917	0.00213961	0.00453857		1.15981
orf19.1865			0.213488	5.58714	0.011447	0.0209805		1.15949
orf19.6719	C3_07680W_A		0.213428	6.50672	0.00109703	0.00245281		1.15944
orf19.7457	C3_06680C_A		0.213274	1.47022	0.373211	0.45546		1.15932
orf19.4607	C4_01860C_A		0.213122	2.82959	0.203154	0.271335		1.15919
orf19.5035	C1_13970C_A	HPC2	0.212938	5.73146	0.00330681	0.00678511		1.15905
orf19.4187	C4_00560C_A	MMM1	0.212932	3.86281	0.0544814	0.0852346		1.15904
orf19.2084	C2_00450C_A	CDH1	0.21251	5.80856	0.0130132	0.023621		1.1587
orf19.7452	C3_06630W_A		0.212407	2.38161	0.21487	0.284547		1.15862
orf19.4981	C1_13490C_A		0.211935	3.28605	0.126686	0.179152		1.15824
orf19.1097	C6_04380W_A	ALS2	0.21148	7.137	0.000647596	0.001513		1.15788
orf19.3167	C5_02040W_A		0.211406	7.59296	0.0020606	0.00438012		1.15782
orf19.2098	C2_00340C_A	ARO8	0.211378	5.81422	0.00300198	0.00622042		1.15779
orf19.4525			0.211275	4.39475	0.0448207	0.0718499		1.15771
orf19.1428	C4_04220W_A	DUO1	0.210777	1.54295	0.331004	0.411026		1.15731
orf19.3345			0.210772	7.34787	0.000721817	0.00166573		1.15731
orf19.2146	C6_04540C_A	HAT2	0.21018	5.32694	0.0211747	0.0365867		1.15683
orf19.1089	C6_04310W_A	PEX11	0.210176	1.10807	0.443268	0.523409		1.15683
orf19.3439	C6_01450C_A		0.210147	2.04518	0.28364	0.359822		1.15681
orf19.6399	CR_08320W_A	ATS1	0.209884	4.06365	0.0378776	0.0616429		1.15659
orf19.3737	CR_02300C_A		0.209203	5.05678	0.0184517	0.0323112		1.15605
orf19.2646	C5_03330C_A	ZCF13	0.209186	4.52295	0.0564847	0.0880155		1.15604
orf19.260	C3_02680C_A	SLD1	0.209033	5.58043	0.00668094	0.0128398		1.15591
orf19.6985	C3_05470W_A	TEA1	0.208974	3.17625	0.120933	0.171862		1.15587
orf19.3701	C7_02630W_A		0.208609	3.11061	0.14884	0.206365		1.15557
orf19.4474			0.208415	2.58315	0.204363	0.27275		1.15542
orf19.1643	C3_02030W_A		0.208093	6.2469	0.00206151	0.00438012		1.15516
orf19.3593	C2_08780W_A	RPT6	0.208023	6.90979	0.000563301	0.00132914		1.1551
orf19.490	CR_04070W_A	NAT5	0.207976	5.18427	0.0134327	0.0243178		1.15507
orf19.1376	C2_09740W_A	SSO2	0.207738	6.60103	0.00411253	0.00826442		1.15488
orf19.862	C2_03570C_A		0.207672	4.01196	0.0659113	0.101089		1.15482
orf19.1440	C4_03320W_A		0.207441	4.24307	0.072657	0.109799		1.15464
orf19.4495	C2_04550C_A	NDH51	0.207406	9.50683	0.000332336	0.00081553		1.15461
orf19.1667	C3_01790C_A		0.207234	4.10873	0.0599895	0.0928409		1.15447
orf19.2035	C2_00890W_A		0.206957	1.94948	0.312615	0.391575		1.15425
orf19.1179	C6_00200C_A		0.206932	8.3008	0.00481988	0.00954189		1.15423
orf19.6942	C3_03750C_A	ORC3	0.206921	5.25354	0.0112668	0.0206842		1.15422
orf19.6670	C5_03580C_A	CAC2	0.205972	4.06628	0.0463573	0.0738578		1.15346
orf19.3153	C3_01160W_A	MSS4	0.20583	6.44892	0.0015297	0.00332755		1.15335
orf19.5209	C2_05850C_A		0.205741	2.96625	0.251362	0.324991		1.15328
orf19.2222	C2_08270C_A		0.205572	4.46385	0.0250235	0.0425501		1.15314
orf19.5077			0.205364	7.8365	0.00102915	0.00231813		1.15298
orf19.5056			0.205359	1.6113	0.345898	0.426899		1.15297
orf19.4630	C4_01550C_A	CPA1	0.205358	1.05562	0.494086	0.575205		1.15297
orf19.1534	C2_02180W_A		0.205355	2.112	0.326551	0.40642		1.15297
orf19.1785	C2_09980W_A		0.205324	1.906	0.338612	0.419329		1.15295
orf19.4107	C2_06110W_A		0.205261	4.61456	0.0247502	0.0421248		1.15289
orf19.4907	C1_10360C_A		0.204847	1.81496	0.352773	0.434109		1.15256
orf19.4445			0.204747	7.26341	0.0236921	0.0404879		1.15248
orf19.184	C2_04800C_A	MDM10	0.204333	3.58765	0.094867	0.13883		1.15215
orf19.6147	CR_07230W_A		0.204157	6.21995	0.0233345	0.0399518		1.15201
orf19.3534	C2_05030C_A	RHO3	0.204009	6.06102	0.00409115	0.00822448		1.15189
orf19.5833	C2_02730W_A		0.203935	5.28546	0.00885751	0.0166421		1.15184
orf19.4046	C5_05460C_A		0.203355	3.74211	0.0904442	0.133178		1.15137
orf19.4534			0.203347	5.50906	0.00575072	0.011174		1.15137
orf19.7360	C3_05790C_A		0.203218	1.5683	0.387799	0.469798		1.15126
orf19.469	CR_03900W_A	HST7	0.202945	5.64265	0.0095429	0.0178378		1.15105
orf19.1888	C2_07430C_A		0.202827	3.7179	0.122024	0.173277		1.15095
orf19.2343	C1_10760W_A	VPS23	0.202794	3.86212	0.0957569	0.139982		1.15092
orf19.6170	C3_07770C_A		0.202448	4.51561	0.0308549	0.0513621		1.15065
orf19.2182	C2_08010W_A	BLM3	0.202388	7.16351	0.00189019	0.00404882		1.1506
orf19.956	C5_00330C_A		0.202311	5.47055	0.0127096	0.0231315		1.15054
orf19.1994	C2_01310W_A		0.20225	3.51649	0.121397	0.172476		1.15049
orf19.7228	C1_14200W_A		0.201967	4.58833	0.0289982	0.0486122		1.15027
orf19.7426	C3_06410C_A		0.201246	4.12127	0.0679398	0.103937		1.14969
orf19.1765	C2_10160W_A		0.201178	3.10801	0.133442	0.187588		1.14964
orf19.4373	CR_03740C_A		0.200965	5.06843	0.0263922	0.0446273		1.14947
orf19.4535			0.200676	3.54347	0.115118	0.164584		1.14924
orf19.1282	C5_04070C_A	CKS1	0.200443	4.46624	0.0558243	0.0871357		1.14905
orf19.7605	CR_10300W_A	PUP1	0.19971	6.16613	0.0103604	0.019182		1.14847
orf19.4084	C2_09230C_A	KIS1	0.197885	6.87449	0.00277388	0.00578067		1.14702
orf19.374	C4_00070C_A		0.197517	6.85237	0.00336209	0.00688044		1.14672
orf19.3984	C5_04960W_A		0.197511	4.63437	0.0427812	0.0688433		1.14672
orf19.4785			0.197342	5.41039	0.012885	0.023404		1.14658
orf19.7215.3	C1_14090W_A		0.197153	8.1563	0.000561434	0.00132531		1.14643
orf19.4396	CR_03530W_A		0.196923	8.36104	0.000417223	0.00100888		1.14625
orf19.2416.1	CR_03090C_A	MLC1	0.196831	5.93574	0.00412406	0.00828453		1.14618
orf19.6872	C2_05590C_A		0.196806	3.78304	0.0877554	0.1299		1.14616
orf19.7554	CR_09830W_A		0.196702	4.07859	0.0641061	0.0986525		1.14608
orf19.3874	CR_06230W_A		0.196622	4.61459	0.0378512	0.0616182		1.14601
orf19.6197			0.196578	6.04775	0.0485109	0.0769075		1.14598
orf19.2180	C2_08020C_A		0.19628	5.38713	0.0200989	0.0349157		1.14574
orf19.6131	CR_07380C_A	KSR1	0.196076	4.75736	0.0364072	0.0594447		1.14558
orf19.4242	C5_02340C_A	CST20	0.195917	7.61144	0.0014379	0.00313912		1.14545
orf19.5046	C4_03900C_A	RAM1	0.195823	3.7207	0.146687	0.203794		1.14538
orf19.4601	C4_01910W_A		0.195693	3.42717	0.120827	0.171801		1.14527
orf19.5645	C4_00200C_A	MET15	0.195532	4.2752	0.0511993	0.0806311		1.14515
orf19.5702	C6_03430C_A		0.195206	6.31248	0.00694432	0.0132992		1.14489
orf19.6760	C3_07320W_A	MDS3	0.194823	7.20347	0.00184129	0.00395026		1.14458
orf19.2663			0.194425	3.95612	0.0782966	0.117445		1.14427
orf19.3281	CR_00750C_A		0.193774	1.52307	0.416525	0.497316		1.14375
orf19.352	C3_03540W_A		0.193584	4.6719	0.0333358	0.0550722		1.1436
orf19.4882	C1_10120C_A		0.193074	6.96117	0.00321929	0.00663045		1.1432
orf19.3687			0.192839	0.402611	0.568091	0.644731		1.14301
orf19.2032	C2_00920W_A		0.192153	2.12834	0.27586	0.351422		1.14247
orf19.6286	CR_07640C_A		0.192108	3.42198	0.110297	0.158521		1.14243
orf19.1526	C2_02100W_A	SNF2	0.191924	7.38258	0.00218	0.00462064		1.14229
orf19.4009	C5_05160C_A	CNB1	0.191751	5.09114	0.0295187	0.0493938		1.14215
orf19.2343.1	C1_10750C_A		0.191592	3.96903	0.0892978	0.131739		1.14202
orf19.2041	C2_00830C_A		0.19141	6.66454	0.0020617	0.00438012		1.14188
orf19.5465	C3_00100W_A		0.191331	6.18941	0.0132094	0.0239453		1.14182
orf19.6225			0.190827	5.47003	0.0336877	0.0555863		1.14142
orf19.2268	C2_07130C_A	RCK2	0.19022	7.21968	0.00494685	0.00977553		1.14094
orf19.5170	C7_02910W_A	ENA21	0.189992	8.55264	0.00119595	0.00265227		1.14076
orf19.2559	CR_01680C_A	CDC4	0.189951	7.81013	0.00507431	0.0100057		1.14073
orf19.5300	C4_04090C_A		0.189512	5.28632	0.0559252	0.0872433		1.14038
orf19.1553	C2_02340C_A	ENT3	0.18929	7.66238	0.00121115	0.00268435		1.1402
orf19.7288	CR_08920W_A		0.189156	0.855032	0.510846	0.591563		1.1401
orf19.6336	C6_00070C_A	PGA25	0.18909	5.19375	0.0453288	0.0724822		1.14004
orf19.4292	C5_02720W_A	PEP12	0.188727	4.059	0.0909812	0.133758		1.13976
orf19.4186	C4_00570C_A	PCT1	0.188251	5.55807	0.0187605	0.0328204		1.13938
orf19.2650	C5_03300C_A		0.188238	4.12539	0.0776001	0.116496		1.13937
orf19.5259	C1_12060C_A		0.188226	2.33167	0.307012	0.385264		1.13936
orf19.1648	C3_02000W_A	RAD50	0.187985	5.35703	0.0312337	0.0519609		1.13917
orf19.3362	C4_03350C_A	AIF1	0.187923	3.02562	0.18274	0.247399		1.13912
orf19.3076	C4_07240W_A		0.18792	6.60333	0.0112523	0.0206721		1.13912
orf19.2337	C1_10800C_A	ALP1	0.187332	7.63723	0.00536261	0.0105134		1.13866
orf19.6972	C3_05350C_A	SMI1B	0.187167	4.72845	0.0467936	0.0744444		1.13853
orf19.3862	CR_06090W_A		0.186841	5.02297	0.0234081	0.0400653		1.13827
orf19.5287	CR_05360C_A		0.186837	2.89647	0.219343	0.289979		1.13827
orf19.1789	C4_05310W_A		0.186319	3.09824	0.265551	0.340834		1.13786
orf19.4560	C4_02270C_A	BFR1	0.186004	9.53284	0.000796024	0.00182541		1.13761
orf19.6235			0.185682	1.88443	0.435964	0.516236		1.13735
orf19.2031	C2_00930C_A	VPS24	0.185577	2.91729	0.264956	0.340151		1.13727
orf19.428			0.185488	2.41813	0.279536	0.355442		1.1372
orf19.5683	C5_00140C_A		0.185032	3.01955	0.293101	0.369506		1.13684
orf19.6168	C3_00910W_A		0.184564	3.28671	0.158712	0.218665		1.13647
orf19.5258	C1_12070C_A		0.184514	1.7806	0.379837	0.462204		1.13643
orf19.1707	C3_01440C_A		0.184219	0.523486	0.57886	0.654634		1.1362
orf19.4471			0.18415	4.68705	0.0495645	0.0784185		1.13615
orf19.2248	C2_06940C_A	ARE2	0.183637	1.9685	0.368788	0.450667		1.13574
orf19.5791	C2_03080W_A	IDH2	0.183618	10.0279	0.0034081	0.00697198		1.13573
orf19.132	C6_01220C_A		0.183457	6.19042	0.0222259	0.0382336		1.1356
orf19.5443	C3_00260C_A	BNA4	0.183277	6.80004	0.00286485	0.00594756		1.13546
orf19.3283	CR_00710C_A		0.182948	3.58535	0.165239	0.226654		1.1352
orf19.4581	C4_02100C_A	GPI14	0.182414	1.09956	0.474868	0.555253		1.13478
orf19.6522	C7_01990C_A		0.181735	4.44751	0.100311	0.145897		1.13425
orf19.6078			0.181672	1.8806	0.342775	0.423619		1.1342
orf19.6039			0.181594	5.68249	0.0141918	0.0255734		1.13414
orf19.4362	CR_03640C_A		0.18156	6.17779	0.00544525	0.0106577		1.13411
orf19.5271	C1_11940C_A		0.181459	1.53053	0.439907	0.520115		1.13403
orf19.5967	C3_04990W_A	FGR44	0.18145	6.89231	0.00906598	0.0169987		1.13402
orf19.3282	CR_00740C_A	BMT3	0.181411	2.92027	0.262451	0.337424		1.13399
orf19.2579	CR_01790C_A		0.181261	4.76935	0.0342265	0.0563731		1.13387
orf19.3859	CR_06070W_A		0.180545	4.91925	0.0454927	0.0726712		1.13331
orf19.2622	CR_07520C_A	YPT31	0.179994	6.35656	0.0101657	0.0188471		1.13288
orf19.6313.2	CR_04790W_A	MVB12	0.179365	4.88789	0.0457717	0.0730527		1.13239
orf19.6958	C3_03630W_A	ECM18	0.179362	3.9249	0.17786	0.241632		1.13238
orf19.4413	C4_06030W_A	CMD1	0.178821	7.13791	0.00439462	0.00877638		1.13196
orf19.4428			0.17882	5.19959	0.0225076	0.0386452		1.13196
orf19.1504	C2_01920C_A		0.178241	5.30452	0.0342408	0.0563796		1.1315
orf19.5563	C6_02870W_A	RNH1	0.178224	5.7065	0.0149871	0.0268646		1.13149
orf19.3819	C4_04630C_A		0.178146	2.0771	0.362855	0.444114		1.13143
orf19.6936	C3_03810W_A	RAD53	0.177591	4.82475	0.0504372	0.0795228		1.13099
orf19.4166	C4_00760W_A	ZCF21	0.177543	6.37523	0.0196201	0.0341928		1.13096
orf19.5162	C7_02990W_A	BCK1	0.177133	6.01791	0.0179759	0.0315692		1.13063
orf19.2315	C1_10990C_A	RTG3	0.176245	5.89328	0.0346355	0.0569437		1.12994
orf19.6322	C6_00150W_A	ARD	0.176244	9.05674	0.0048984	0.0096833		1.12994
orf19.1685	C3_01580W_A	ZCF7	0.176019	2.44093	0.280313	0.356291		1.12976
orf19.268	C3_02770C_A		0.175709	3.21642	0.22833	0.299755		1.12952
[truncated: 3,461 more rows]

## Sheet: SC5314 Drug vs Vehicle
genes				logFC	logCPM	PValue	FDR		Fold change
orf19.5522	C6_02530C_A			2.6363	0.417142	3.98455e-09	1.22103e-07		6.21734
orf19.6000	C3_05220W_A	CDR1		2.41769	7.91879	3.4269e-66	6.19583e-63		5.34317
orf19.778	C1_04680W_A	PIL1		2.23869	5.72182	5.45064e-82	1.47821e-78		4.71968
orf19.6763	C3_07310C_A	SLK19		2.14445	6.90011	1.27774e-99	6.93048e-96		4.42124
orf19.5958	C3_04890W_A	CDR2		1.93743	4.14256	5.9047e-33	2.91155e-30		3.83023
orf19.1178	C6_00180C_A			1.78977	0.514469	1.21599e-05	0.000128069		3.45759
orf19.1340	C7_03350C_A			1.77801	1.12882	3.19017e-08	7.97396e-07		3.42952
orf19.2269	C2_07140W_A			1.74816	2.67205	9.6412e-17	9.86676e-15		3.35931
orf19.3160	C5_02080C_A	HSP12		1.72875	2.95681	1.97149e-20	3.56446e-18		3.3144
orf19.2849	CR_02920C_A	AQY1		1.67304	3.29214	3.6442e-22	8.23589e-20		3.18885
orf19.4379	CR_03810W_A	PRP13		1.65354	3.07896	1.3133e-15	1.17368e-13		3.14605
orf19.2841	CR_02820W_A	PGM2		1.63934	2.63327	1.11933e-11	5.78216e-10		3.11522
orf19.4584	C4_02070W_A	PHO114		1.63613	0.791738	4.3104e-05	0.000369002		3.1083
orf19.272	C3_02810C_A	FAA21		1.61522	3.30596	1.31216e-23	3.23508e-21		3.06359
orf19.4380.1	CR_03620C_A			1.61045	2.82744	8.26527e-17	8.79035e-15		3.05346
orf19.3618	C2_08590W_A	YWP1		1.60936	7.12221	1.9224e-60	2.60677e-57		3.05117
orf19.4393	CR_03500W_A	CIT1		1.59845	8.69203	1.15289e-40	8.93325e-38		3.02818
orf19.5112	C1_08320W_A	TKL1		1.59529	6.87942	1.54013e-52	1.67074e-49		3.02155
orf19.4800	C1_09380W_A	RIM20		1.59271	2.29061	1.92574e-08	5.12021e-07		3.01616
orf19.4624	C4_01690C_A	HRT2		1.55463	1.99125	1.2752e-09	4.46238e-08		2.93757
orf19.4216	C5_02110W_A			1.5255	2.75466	1.52914e-14	1.23792e-12		2.87886
orf19.4602	C4_01900C_A	MDH1-1		1.51828	8.70184	2.04207e-34	1.38452e-31		2.86449
orf19.7281	CR_08860W_A	PDK2		1.5178	3.99555	3.26175e-24	8.84587e-22		2.86353
orf19.695	CR_06590C_A	RGS2		1.49267	0.690008	0.000457721	0.00271331		2.81409
orf19.338	C3_03410C_A			1.47783	4.0425	1.17233e-24	3.53262e-22		2.78529
orf19.5805	C2_02980C_A	DLD1		1.47353	4.13924	1.12924e-23	2.91666e-21		2.77701
orf19.4371	CR_03720W_A	TAL1		1.4628	7.01174	2.29012e-45	2.07027e-42		2.75643
orf19.7306	CR_09100C_A			1.4599	1.19193	2.8824e-05	0.000263201		2.7509
orf19.7522	CR_00130C_A			1.45616	4.6276	2.71137e-25	8.65088e-23		2.74377
orf19.6837	C1_04450C_A	FMA1		1.44241	3.5483	2.76574e-17	3.12528e-15		2.71775
orf19.4752	C1_08940C_A	MSN4		1.43892	3.59737	1.27647e-19	1.954e-17		2.71119
orf19.1290	C4_05300W_A	XKS1		1.43855	3.06367	1.08909e-15	1.00123e-13		2.71048
orf19.3507	C6_02040W_A	MCR1		1.42999	6.127	2.99446e-13	2.0823e-11		2.69444
orf19.1796	C4_05390W_A			1.42846	1.57375	2.95681e-07	5.47363e-06		2.6916
orf19.244	C3_02550C_A	DCG1		1.4209	0.527158	0.000208608	0.00140383		2.67752
orf19.5390	C3_00680C_A			1.42039	1.24205	0.139189	0.261414		2.67657
orf19.1628	C3_02170C_A	LAP41		1.41946	3.55015	3.11754e-18	4.22739e-16		2.67485
orf19.424	C1_05410C_A	TRP99		1.40754	3.34624	8.22578e-14	6.02927e-12		2.65284
orf19.6993	C3_05580C_A	GAP2		1.39075	1.63652	5.12371e-07	8.87891e-06		2.62216
orf19.2990	C1_02990C_A	XOG1		1.38855	2.84331	2.91943e-13	2.05649e-11		2.61816
orf19.1190	C6_00300C_A	STV1		1.38389	5.22691	8.12032e-34	4.40446e-31		2.60972
orf19.2047	C2_00770W_A			1.38229	0.977356	1.42944e-05	0.000146013		2.60682
orf19.6139	CR_07290W_A	FRE7		1.36923	2.39256	2.71217e-10	1.05077e-08		2.58333
orf19.5729	C6_03610W_A	FGR17		1.36158	0.304969	0.00192849	0.0088048		2.56967
orf19.2699	C4_02940W_A	ABP1		1.34803	5.82566	4.5744e-28	1.90858e-25		2.54565
orf19.6323	C6_00140C_A	HPA2		1.34025	1.58649	7.11717e-06	8.09156e-05		2.53195
orf19.5892	C3_04420W_A			1.33702	3.407	5.96807e-14	4.55753e-12		2.52629
orf19.4356	CR_03850W_A	HGT3		1.33522	1.89939	1.54624e-06	2.29475e-05		2.52313
orf19.6043	C1_00630W_A			1.33137	1.23438	1.05967e-05	0.000113681		2.51642
orf19.5604	C6_03170C_A	MDR1		1.33089	2.75289	2.3224e-10	9.06236e-09		2.51559
orf19.2531	CR_01470W_A	CSP37		1.31839	2.37904	5.7409e-08	1.33642e-06		2.49388
orf19.7043.1	C7_00750W_A	ACB1		1.31275	2.37306	3.83591e-09	1.19575e-07		2.48414
orf19.7021	C7_00930W_A	GPH1		1.30583	2.25939	8.26798e-08	1.86081e-06		2.47225
orf19.3548.1	C2_05180W_A	WH11		1.2977	2.02525	0.00173656	0.008092		2.45837
orf19.4019	C5_05260W_A			1.29463	1.8881	5.61823e-08	1.3135e-06		2.45315
orf19.2769	C4_02340W_A			1.28837	1.56383	6.15348e-05	0.000504939		2.44251
orf19.1974	C5_00930C_A	TFS1		1.28359	3.00417	3.91686e-09	1.2071e-07		2.43444
orf19.2228	C2_06770W_A			1.27303	1.19009	7.87628e-05	0.000620042		2.41668
orf19.4633	C4_01510W_A			1.2697	3.58658	7.12429e-16	6.77933e-14		2.41112
orf19.6608	CR_09530C_A			1.26232	2.05792	3.53748e-08	8.76132e-07		2.39881
orf19.5777	C2_03170W_A			1.2585	0.941421	0.001943	0.00886362		2.39247
orf19.5815	C2_02890W_A	SCT2		1.25728	2.50827	2.91336e-09	9.29534e-08		2.39045
orf19.3325				1.2561	3.11182	4.46788e-12	2.49833e-10		2.3885
orf19.7676	CR_10840C_A	XYL2		1.25376	4.08588	1.2391e-11	6.22302e-10		2.38463
orf19.7127.1	C7_04340C_A			1.25342	0.103306	0.00401169	0.016166		2.38407
orf19.2474	C1_05770C_A	PRC3		1.25162	3.60677	2.67804e-16	2.64104e-14		2.38108
orf19.7242	C1_14300C_A	NCR1		1.25025	3.31301	2.41208e-15	2.11018e-13		2.37883
orf19.94	C6_00930C_A			1.24971	2.38772	8.48919e-08	1.9027e-06		2.37794
orf19.2756	C4_02460W_A			1.24828	0.234381	0.00346592	0.0143835		2.37558
orf19.1814	CR_07090W_A	STT4		1.23877	5.01922	1.46114e-20	2.73284e-18		2.35998
orf19.6318	CR_04730W_A			1.22541	3.11279	1.84114e-12	1.12206e-10		2.33823
orf19.5078	C1_08060W_A	OFR1		1.22337	3.99457	6.4876e-13	4.18914e-11		2.33491
orf19.2737	C4_02620C_A			1.22216	2.13665	3.6419e-07	6.51935e-06		2.33295
orf19.7502	CR_00310C_A			1.21317	1.46128	0.000181926	0.00125543		2.31847
orf19.1709	C3_01420C_A			1.20874	1.79216	0.000233045	0.00153031		2.31136
orf19.1002	C1_10560C_A			1.20184	1.5101	4.25476e-05	0.000366897		2.30032
orf19.1275	C4_05880W_A			1.2016	2.47071	3.522e-08	8.76132e-07		2.29994
orf19.4476	C1_04010C_A			1.19812	0.733407	0.00132197	0.00649492		2.29441
orf19.5275	C1_11920W_A			1.19752	2.32622	5.06262e-08	1.21503e-06		2.29345
orf19.4864	C1_09980C_A			1.18927	0.853308	0.000361903	0.00222306		2.28038
orf19.5029	C1_13910C_A	MODF		1.1814	2.02692	8.72587e-07	1.40326e-05		2.26796
orf19.1761	C2_10200W_A			1.18138	1.53648	0.000594318	0.00337876		2.26794
orf19.7140	C7_04280C_A			1.18104	3.87254	3.74161e-16	3.62402e-14		2.26741
orf19.4939	C1_13120C_A	MON2		1.17775	2.91989	1.32987e-07	2.79582e-06		2.26224
orf19.2048	C2_00760C_A			1.17552	3.05198	8.21917e-07	1.34279e-05		2.25874
orf19.5809	C2_02950W_A			1.16786	0.528548	0.00823141	0.0288417		2.24678
orf19.3152	C2_06700W_A	AMO2		1.16432	1.97262	1.80665e-06	2.59928e-05		2.24128
orf19.789	C4_03940C_A	PYC2		1.1632	3.24845	1.19045e-11	6.09149e-10		2.23953
orf19.2863	CR_03000C_A			1.16318	0.419439	0.00342403	0.0142205		2.23951
orf19.4024	C5_05300W_A	RIB5		1.16262	4.10162	7.86306e-17	8.52984e-15		2.23864
orf19.2770.1	C4_02320C_A	SOD1		1.16118	4.89954	1.05978e-21	2.29929e-19		2.2364
orf19.6842	C1_04480C_A	TUS1		1.15949	3.72649	1.84618e-10	7.30926e-09		2.23379
orf19.6036	C1_00690W_A	RIC1		1.15748	1.25917	0.000272368	0.00174831		2.23067
orf19.1917	C2_00060C_A			1.15544	6.52247	1.2969e-19	1.954e-17		2.22752
orf19.6387	CR_08250C_A	HSP104		1.15382	4.52711	3.04532e-14	2.35969e-12		2.22503
orf19.7323	CR_09270C_A	CBP1		1.14918	4.24357	5.67625e-18	7.50926e-16		2.21789
orf19.4970	C1_13430C_A			1.14589	0.403494	0.00669269	0.0244452		2.21283
orf19.6690	C7_03580C_A			1.14532	0.512056	0.00246326	0.0107661		2.21195
orf19.931	C5_00580W_A			1.14451	1.44279	5.95121e-05	0.000490568		2.21071
orf19.744	C4_05140C_A	GDB1		1.14449	3.90654	3.22819e-11	1.52258e-09		2.21067
orf19.5450	C3_00200C_A	ETR1		1.14383	4.46721	1.20604e-11	6.11361e-10		2.20966
orf19.3064.1	C1_03660W_A			1.14382	2.2397	1.34423e-07	2.80657e-06		2.20965
orf19.1234	C4_05530W_A	FGR6-10		1.14366	1.01056	0.000204254	0.00138139		2.20941
orf19.6968	C3_05320W_A			1.14229	4.13586	1.04095e-11	5.42897e-10		2.20731
orf19.459	CR_05950C_A	ADP1		1.14181	4.32335	1.69133e-17	1.99429e-15		2.20657
orf19.3340	C1_01520C_A	SOD2		1.14002	5.188	8.19036e-20	1.3066e-17		2.20384
orf19.3149	C2_06730W_A	LSP1		1.13085	5.68488	1.94158e-26	7.52222e-24		2.18988
orf19.4980	C1_13480W_A	HSP70		1.12597	4.69302	3.88388e-05	0.000338684		2.18248
orf19.3567	C2_05360C_A	BIO32		1.11595	1.13111	0.000254649	0.0016502		2.16738
orf19.1723	C3_01280W_A			1.10817	1.65095	2.57885e-05	0.000239106		2.15573
orf19.3878	CR_06260W_A			1.10598	1.62367	8.29415e-05	0.000650108		2.15246
orf19.4317	C5_02930C_A	GRE3		1.10499	1.46305	0.000469128	0.00277487		2.15097
orf19.3171	C5_02000C_A	ACH1		1.10152	7.97694	5.64274e-31	2.55052e-28		2.1458
orf19.899	C2_03290W_A			1.1014	0.542157	0.0090978	0.0310942		2.14563
orf19.3459	C6_02190C_A			1.09991	3.36598	4.23893e-11	1.9321e-09		2.14341
orf19.645.1	CR_05080W_A	VMA13		1.09957	3.88484	1.94897e-10	7.6603e-09		2.1429
orf19.4953	C1_13270W_A			1.09643	1.67561	0.000176334	0.00122463		2.13825
orf19.909.1	C2_03210W_A			1.09556	2.28537	0.00430243	0.0171164		2.13697
orf19.5622	C6_03340C_A	GLC3		1.09553	2.81565	4.20179e-09	1.27321e-07		2.13691
orf19.2351	C1_10700C_A	NIT3		1.09321	2.53452	1.70657e-05	0.000171098		2.13349
orf19.434	C1_05300C_A	PRD1		1.09088	3.9518	1.7136e-14	1.36685e-12		2.13004
orf19.4555	C6_04130C_A	ALS4		1.08836	10.0186	2.90687e-34	1.75188e-31		2.12632
orf19.4114	C2_06070W_A	FAA2-1		1.08808	2.52826	1.40064e-08	3.77964e-07		2.12592
orf19.2172	C2_08130W_A	ARA1		1.08419	0.198232	0.0116234	0.0379791		2.12019
orf19.3278	CR_00780C_A	GSY1		1.08347	5.51048	1.40225e-24	4.00304e-22		2.11912
orf19.6755	C3_07360W_A	DLD2		1.08317	1.69926	2.04321e-05	0.000198253		2.11869
orf19.3888	CR_06340C_A	PGI1		1.08237	5.77122	3.16674e-20	5.36762e-18		2.11751
orf19.7214	C1_14060W_A			1.07556	2.0547	2.9508e-06	3.88475e-05		2.10754
orf19.6038				1.07098	2.02731	3.26358e-05	0.000293139		2.10087
orf19.7512	CR_00220W_A			1.0631	2.01939	2.61037e-05	0.000241615		2.08942
orf19.2296	C1_11200W_A			1.06228	3.73433	3.8889e-12	2.26811e-10		2.08823
orf19.5131	C7_03240W_A			1.06121	3.8476	5.64927e-13	3.72585e-11		2.08668
orf19.5267	C1_11990W_A			1.06022	3.50257	4.46218e-12	2.49833e-10		2.08525
orf19.7578	CR_10020C_A			1.05849	1.53575	9.23719e-05	0.00071575		2.08274
orf19.7328	CR_09330C_A			1.05599	5.54984	5.96915e-23	1.40768e-20		2.07915
orf19.3508	C6_02030C_A			1.05074	1.79029	0.000150409	0.00106768		2.07159
orf19.251	C3_02610C_A	GLX3		1.04717	3.4658	1.73521e-07	3.52501e-06		2.06647
orf19.4549	C1_01760W_A	FGR38		1.04672	3.36186	1.49612e-11	7.37721e-10		2.06583
orf19.707	CR_06730W_A	APG7		1.04453	1.23264	0.0022888	0.0101177		2.06269
orf19.1515	C2_02010C_A	CHT4		1.044	0.287315	0.0117312	0.0382587		2.06194
orf19.1180	C6_00210W_A			1.04392	3.27903	1.11796e-09	3.98935e-08		2.06183
orf19.5211	C2_05890C_A	IDP1		1.04318	4.8029	3.72803e-13	2.4964e-11		2.06076
orf19.3302	C1_01140C_A			1.03947	2.33455	7.74256e-06	8.69476e-05		2.05548
orf19.806	C2_04150C_A	VMA7		1.03876	3.36228	1.17075e-10	5.0001e-09		2.05446
orf19.543	CR_04530W_A	FUM11		1.03686	4.78597	6.93751e-20	1.14027e-17		2.05175
orf19.1325	C4_03540C_A	ECM38		1.02765	0.708572	0.00263818	0.0114293		2.0387
orf19.4270	C5_02570W_A	MNN13		1.02631	0.436797	0.00724062	0.0259743		2.03681
orf19.2989	C1_02980W_A	GOR1		1.02318	0.528407	0.0160297	0.048818		2.03239
orf19.6160	C3_00850C_A			1.02089	6.54994	2.17526e-25	7.37414e-23		2.02917
orf19.2346	C1_10730W_A			1.02052	3.31206	6.66575e-08	1.53199e-06		2.02865
orf19.1638	C3_02080W_A			1.01343	3.63586	3.79794e-11	1.74576e-09		2.01871
orf19.802	C2_04190C_A	UGA1		1.01306	1.68453	0.00452238	0.0177749		2.01819
orf19.4979	C1_13470W_A	KNS1		1.01126	2.57069	2.25579e-05	0.00021428		2.01567
orf19.4899	C1_10290W_A	GCA1		1.01066	0.273959	0.0170431	0.051186		2.01483
orf19.2701	C4_02930W_A			1.00932	1.54675	0.000160785	0.00112674		2.01296
orf19.5269.1	C1_11960C_A			1.00661	1.79863	4.53409e-05	0.000385469		2.00918
orf19.3811	C4_04710W_A	GYP1		1.00427	3.65966	7.23147e-11	3.24161e-09		2.00593
orf19.4712	C1_07770W_A	FGR6-3		1.00038	1.46518	0.000214109	0.00143197		2.00053
orf19.346	C3_03480C_A	ALT1		1.00031	4.4014	2.66981e-15	2.29858e-13		2.00043
orf19.6638	CR_05740C_A	PTC4		0.998415	1.9741	4.01135e-05	0.000348121		1.9978
orf19.3873	CR_06180W_A	ARC40		0.993394	5.13772	2.56653e-20	4.49061e-18		1.99086
orf19.5342	C2_10630W_A			0.99218	3.46828	2.8933e-10	1.113e-08		1.98919
orf19.3282	CR_00740C_A	BMT3		0.985658	3.13969	1.11313e-07	2.40543e-06		1.98022
orf19.1421	C4_04270W_A			0.984239	1.19772	0.000794616	0.00425889		1.97827
orf19.1368	C2_09820W_A			0.983751	1.16815	0.00139999	0.00680426		1.9776
orf19.918	C3_04070C_A	CDR11		0.983172	5.35667	1.27321e-14	1.04635e-12		1.97681
orf19.734	CR_07150W_A	GLK1		0.982031	3.52133	3.7313e-08	9.15772e-07		1.97524
orf19.4309	C5_02860C_A	GRP2		0.97952	2.50824	1.95658e-05	0.000192256		1.97181
orf19.3180	C5_01920C_A			0.979031	2.2111	1.79951e-05	0.000178438		1.97114
orf19.410.3	C1_05560W_A	RIB4		0.97891	4.18133	1.54023e-12	9.60255e-11		1.97098
orf19.1297	C4_03810W_A			0.977736	1.3206	0.00121346	0.00607176		1.96937
orf19.6066				0.977684	4.13173	1.41819e-09	4.93094e-08		1.9693
orf19.6910	C7_01300C_A	PSF1		0.972643	0.448697	0.0254211	0.0701344		1.96243
orf19.5816	C2_02880C_A	EBP7		0.970572	1.73121	6.33503e-05	0.00051454		1.95962
orf19.3003	C1_03100W_A			0.96997	5.18554	1.52e-17	1.83211e-15		1.9588
orf19.1203	C6_00410C_A	SRO77		0.968048	4.73254	1.5574e-16	1.56432e-14		1.95619
orf19.4774	C1_09160W_A	AOX1		0.96643	0.584032	0.00896122	0.0307242		1.954
orf19.6840	C1_04470C_A			0.965752	0.00122825	0.0342068	0.088774		1.95308
orf19.3053	C1_03510C_A			0.964953	2.32535	5.40952e-05	0.000451403		1.952
orf19.3558	C2_05290C_A			0.963014	2.96505	2.51486e-05	0.000234375		1.94938
orf19.1196	C6_00350W_A	PKH3		0.961351	5.15559	9.31659e-17	9.71792e-15		1.94713
orf19.4390	CR_03470W_A			0.955282	4.90234	6.48587e-15	5.41221e-13		1.93896
orf19.1509	C2_01970C_A	ROD1		0.955058	6.44614	6.40905e-19	8.91351e-17		1.93866
orf19.4878	C1_10090C_A			0.951202	4.87871	4.39688e-12	2.49833e-10		1.93348
orf19.3323	C1_01340C_A			0.9504	1.23929	0.00472625	0.0183896		1.93241
orf19.7297	CR_09010C_A			0.950032	3.22459	9.44014e-05	0.000729392		1.93192
orf19.1027	C1_03820W_A	PDR16		0.947615	2.70833	4.86284e-06	5.88751e-05		1.92868
orf19.7279	CR_08840C_A	NIT2		0.943649	0.977805	0.00615266	0.022865		1.92339
orf19.5804	C2_02990C_A	HYU1		0.942149	4.22675	3.2222e-12	1.92057e-10		1.92139
orf19.5797	C2_03040W_A	PLC2		0.94159	2.48578	5.86426e-06	6.91473e-05		1.92064
orf19.1356	C2_09960W_A			0.939011	0.655185	0.00719862	0.0258578		1.91721
orf19.2046	C2_00780W_A	POT1-2		0.93755	0.945207	0.00616964	0.0229049		1.91527
orf19.3490	C2_10420W_A	FGR6-4		0.936907	2.69664	4.99898e-06	6.01783e-05		1.91442
orf19.2174	C2_08110W_A	RAD57		0.935644	2.48632	5.45564e-06	6.48934e-05		1.91274
orf19.6828.1	C3_06750W_A			0.934106	1.98926	0.0125855	0.0403929		1.91071
orf19.6875	C2_05650W_A	VPS35		0.93147	3.98896	3.61443e-11	1.69006e-09		1.90722
orf19.2446	C1_05990C_A			0.926397	0.693275	0.0118191	0.0384796		1.90052
orf19.6470	C7_02390W_A	AHP2		0.92447	2.30628	0.00126418	0.00627348		1.89799
orf19.3872	CR_06170W_A			0.923918	1.78262	0.000104276	0.000791038		1.89726
orf19.7310	CR_09140C_A			0.92374	2.17365	2.3653e-05	0.000222732		1.89703
orf19.2710	C4_02860W_A			0.92269	3.81982	1.24895e-08	3.42135e-07		1.89565
orf19.6671	C5_03590W_A	LAP4		0.91779	2.25729	3.71384e-05	0.000328076		1.88922
orf19.2693	C4_02990C_A	GST2		0.917033	1.82317	0.00110593	0.00557488		1.88823
orf19.1570	C2_02460W_A	ERG7		0.915589	5.6872	7.08472e-18	8.99489e-16		1.88634
orf19.1339	C7_03360W_A	CPY1		0.911346	3.9867	1.75199e-09	5.90234e-08		1.8808
orf19.5727	C6_03590C_A			0.910707	1.20493	0.00198814	0.00899389		1.87997
orf19.6261	C1_06520C_A	BPH1		0.909336	1.69418	0.0188872	0.0556844		1.87818
orf19.4898	C1_10280C_A			0.909079	2.59201	2.50392e-06	3.44043e-05		1.87785
orf19.1338	C7_03370C_A			0.907622	3.89116	8.10072e-11	3.6015e-09		1.87595
orf19.1078	C6_04220C_A	HBR2		0.907514	4.40514	1.01233e-10	4.35783e-09		1.87581
orf19.6296	C5_01620C_A	VPS22		0.9075	0.512374	0.0159194	0.0486187		1.87579
orf19.2168.3	C2_08160C_A			0.907154	5.29224	4.55447e-08	1.09793e-06		1.87534
orf19.3705	CR_07770C_A	PTC6		0.906863	3.75813	3.18091e-08	7.97396e-07		1.87496
orf19.5821	C2_02840C_A			0.904442	2.95489	1.13767e-07	2.44869e-06		1.87182
orf19.2655	C5_03240W_A	BUB3		0.904119	2.96085	8.8043e-06	9.72598e-05		1.8714
orf19.1738	CR_04660C_A	UGP1		0.90314	6.20839	1.29515e-21	2.70188e-19		1.87013
orf19.7061	C7_00580C_A			0.902619	1.47653	0.000970085	0.00502074		1.86946
orf19.2170	C2_08140C_A	PHM7		0.902331	5.05447	2.70277e-14	2.12461e-12		1.86908
orf19.2244	C2_06890C_A			0.901758	1.59966	0.0251554	0.0695782		1.86834
orf19.2277	C2_07210C_A	TPK2		0.901146	3.86072	3.03963e-10	1.15293e-08		1.86755
orf19.1135	C1_11810W_A	CAS1		0.900515	2.64056	0.000238702	0.0015599		1.86673
orf19.4316	C5_02920W_A			0.90033	2.54222	0.00323739	0.0135595		1.86649
orf19.2988	C1_02970W_A			0.898582	4.45388	1.38187e-10	5.72159e-09		1.86423
orf19.5965	C3_04970C_A			0.896051	4.29018	6.01192e-10	2.22385e-08		1.86096
orf19.3245	CR_01090W_A			0.895643	2.72112	8.60686e-07	1.38939e-05		1.86044
orf19.1203.1	C6_00420W_A	DPM2		0.895138	2.65199	0.00304206	0.0128706		1.85979
orf19.540	CR_04490C_A			0.894929	2.97257	3.76446e-07	6.71658e-06		1.85952
orf19.7434	C3_06450W_A	GLG2		0.890831	1.74444	0.000483218	0.00284579		1.85424
orf19.6951	C3_03680W_A			0.883446	2.94518	6.04229e-06	7.06323e-05		1.84478
orf19.7157	C7_04170W_A			0.883335	0.586396	0.0234611	0.0657979		1.84463
orf19.953.1	C5_00370W_A	COF1		0.882263	6.29241	4.37664e-19	6.24708e-17		1.84326
orf19.5725	C6_03580W_A	CCZ1		0.880912	1.55551	0.000852291	0.00451889		1.84154
orf19.1153	C1_11660W_A	GAD1		0.877425	2.57805	3.96322e-05	0.000344495		1.83709
orf19.5760	C6_03850C_A	IHD1		0.876878	2.07775	0.000181052	0.00125099		1.8364
orf19.6773	C3_07260C_A	ECM29		0.87268	4.63619	3.09386e-06	4.03392e-05		1.83106
orf19.2895	C4_06400C_A	VMA8		0.871296	4.86741	8.91475e-12	4.69453e-10		1.82931
orf19.1946	C5_01230C_A			0.871054	3.78364	4.55106e-08	1.09793e-06		1.829
orf19.2280	C2_07230C_A	ZCF10		0.86809	3.11553	1.19191e-07	2.54524e-06		1.82524
orf19.1097	C6_04380W_A	ALS2		0.86711	7.94049	3.94452e-19	5.78245e-17		1.824
orf19.2839	CR_02810W_A	CIRT4B		0.866752	0.435279	0.0366329	0.0934164		1.82355
orf19.6452	C7_02570C_A	RBP1		0.866215	4.88018	0.00246783	0.0107774		1.82287
orf19.5741	C6_03700W_A	ALS1		0.866187	10.2192	8.35043e-21	1.67751e-18		1.82284
orf19.2510	C3_01070C_A			0.864648	0.845506	0.0128013	0.0409642		1.8209
orf19.4191.1	C4_00500W_A			0.861145	2.83549	0.00016956	0.00118213		1.81648
orf19.4063	C1_05080W_A	GPT1		0.860998	1.58346	0.000747907	0.00407294		1.81629
orf19.6058				0.859826	4.19198	9.95677e-11	4.32044e-09		1.81482
orf19.4497	C2_04530W_A	MED8		0.855125	1.02873	0.0112836	0.0370472		1.80891
orf19.5960	C3_04910C_A	NCE102		0.854295	5.29163	3.63999e-13	2.46791e-11		1.80788
orf19.1866	C2_07590W_A	VMA10		0.853766	4.40326	0.00263098	0.0114072		1.80721
orf19.2412	CR_03130W_A			0.853479	0.974429	0.0304082	0.0806917		1.80685
orf19.6148	CR_07220C_A			0.85155	0.967849	0.00965231	0.0325181		1.80444
orf19.1285	C5_04050W_A			0.850034	4.45482	9.46163e-13	6.03763e-11		1.80254
orf19.7080	C7_00400W_A	LEU2		0.848391	3.20343	8.91366e-08	1.98962e-06		1.80049
orf19.2649	C5_03310C_A	PCL1		0.844955	1.85071	0.000803921	0.00430026		1.79621
orf19.5612	C6_03250W_A	BMT4		0.843712	4.96722	1.9748e-09	6.5313e-08		1.79466
orf19.95	C6_00940C_A			0.841906	1.9452	0.000657352	0.00366065		1.79242
orf19.3219	C5_03930C_A			0.841856	2.44391	0.00011761	0.000870279		1.79235
orf19.6116	CR_07490C_A	GLK4		0.841524	0.989214	0.00779912	0.0275945		1.79194
orf19.7304	CR_09070C_A			0.841281	1.41804	0.00394495	0.0159634		1.79164
orf19.5094	C1_08170C_A	BUL1		0.840581	1.26737	0.00402491	0.0162072		1.79077
orf19.1034	C1_03750W_A			0.840505	1.72432	0.000667763	0.00370721		1.79068
orf19.349	C3_03510C_A			0.838965	2.54667	6.90463e-06	7.9177e-05		1.78877
orf19.837.1	C2_03840C_A	INO4		0.838502	1.59777	0.00286591	0.0121953		1.78819
orf19.3065	C1_03670C_A	DAO1		0.835861	4.26865	1.48561e-10	6.01341e-09		1.78492
orf19.3694	C1_02370C_A			0.835318	4.19936	4.43088e-09	1.32779e-07		1.78425
orf19.1637	C3_02090C_A			0.833855	3.47591	4.46736e-07	7.84174e-06		1.78244
orf19.2184	C2_07980W_A			0.833441	4.34185	3.70085e-11	1.71568e-09		1.78193
orf19.897	C2_03310C_A	VPS20		0.833251	2.99958	2.79377e-06	3.71407e-05		1.7817
orf19.2914	C4_06240W_A			0.832391	3.04202	2.5459e-06	3.46958e-05		1.78063
orf19.7196	C7_03860W_A			0.829416	3.63843	2.29897e-06	3.21678e-05		1.77697
orf19.4253	C5_02450W_A			0.827517	3.00163	6.00125e-06	7.05988e-05		1.77463
orf19.2670	C4_03200C_A			0.827207	2.35659	2.33594e-05	0.000220734		1.77425
orf19.1891	C2_07400C_A	43922		0.825118	5.42566	5.70143e-13	3.72585e-11		1.77168
orf19.1513	C2_01990C_A	FAB1		0.823799	4.04347	2.73515e-09	8.83064e-08		1.77006
orf19.1092	C6_04340W_A			0.822833	1.75379	0.00175858	0.00816655		1.76888
orf19.3355	C1_01650W_A	ISN1		0.822433	2.72743	8.89904e-05	0.000693512		1.76839
orf19.2396	CR_03280W_A	IFR2		0.819966	5.09547	1.13562e-12	7.16235e-11		1.76536
orf19.4171	C4_00710W_A			0.819714	3.44512	8.93302e-07	1.4209e-05		1.76506
orf19.5525	C6_02560W_A			0.819446	3.65039	2.17915e-07	4.29807e-06		1.76473
orf19.6796	C3_07040C_A	YSA1		0.814894	2.307	0.00350059	0.0144941		1.75917
orf19.2116	C2_00160C_A	NAT2		0.814804	5.54716	6.79087e-12	3.6469e-10		1.75906
orf19.1042	C1_04100C_A	POR1		0.814434	8.59274	3.45056e-13	2.3691e-11		1.75861
orf19.2350	C1_10710C_A			0.813893	0.770816	0.0135731	0.0427776		1.75795
orf19.5194.1	C1_04430C_A			0.812405	3.78725	1.17362e-06	1.79958e-05		1.75614
orf19.5257	C1_12080W_A	LCB4		0.811569	3.48754	2.08462e-07	4.17232e-06		1.75512
orf19.1012	CR_05310W_A			0.811402	1.68872	0.00321162	0.013462		1.75492
orf19.3575	C2_05460W_A	CDC19		0.8102	6.58441	1.52676e-10	6.13418e-09		1.75345
orf19.3047	C1_03450C_A			0.808019	4.52645	2.31073e-11	1.11905e-09		1.75081
orf19.7199	C7_03830C_A			0.807988	-0.0192862	0.0863191	0.182674		1.75077
orf19.4913	C1_12830C_A			0.807088	3.08581	1.05992e-05	0.000113681		1.74968
orf19.4570	C4_02200C_A			0.805868	0.614705	0.0279736	0.0757355		1.7482
orf19.6544	C7_01780W_A	LPI9		0.805721	5.74334	3.19553e-15	2.70821e-13		1.74802
orf19.213	C2_08930W_A			0.802902	3.23638	0.00306662	0.0129543		1.74461
orf19.4930	C1_13020C_A	SPC3		0.799995	3.61262	1.46886e-05	0.000149758		1.7411
orf19.6509	C7_02080W_A			0.798864	2.81493	0.000862378	0.00456791		1.73973
orf19.5286	CR_05380C_A	YCP4		0.798534	5.17553	2.62462e-08	6.65231e-07		1.73933
orf19.6790	C3_07100C_A			0.798215	2.99755	2.55398e-06	3.47188e-05		1.73895
orf19.2370	CR_06940W_A	DSL1		0.797701	1.66075	0.00140426	0.00681887		1.73833
orf19.4157	C4_00830W_A	SPS20		0.797288	2.51734	0.000141637	0.00101888		1.73783
orf19.2568	CR_01730W_A	IFU5		0.795015	4.78177	2.42782e-07	4.73762e-06		1.7351
orf19.6788	C3_07120W_A			0.793573	0.571688	0.0265768	0.0727734		1.73336
orf19.4952.1	C1_13260W_A			0.792984	4.26074	3.79071e-06	4.72663e-05		1.73265
orf19.1860.1	C2_07650C_A			0.792468	4.67009	1.2837e-11	6.38789e-10		1.73204
orf19.6634	CR_05780W_A	VMA2		0.792107	7.84575	1.29794e-17	1.6e-15		1.7316
orf19.5731	C6_03630W_A	PAD1		0.791456	1.05138	0.0110972	0.0366133		1.73082
orf19.5190	C7_02760W_A			0.789384	0.480625	0.078618	0.169958		1.72834
orf19.3392	C6_01900C_A	DOG1		0.78906	4.78828	3.18842e-09	1.01134e-07		1.72795
orf19.5852	CR_05500C_A			0.786595	2.97557	1.41126e-05	0.000144428		1.725
orf19.6877	C2_05660W_A	PNG2		0.786248	5.74025	5.86891e-12	3.1833e-10		1.72458
orf19.5024	C1_13860C_A	GND1		0.785869	8.58425	6.58055e-14	4.88944e-12		1.72413
orf19.6534.2	C7_01850C_A	CRN1		0.785679	6.7432	1.31995e-15	1.17368e-13		1.7239
orf19.5000	C1_13630W_A	CYB2		0.785315	4.17437	1.57681e-09	5.44752e-08		1.72347
orf19.2762	C4_02410C_A	AHP1		0.78504	1.74016	0.0177921	0.0529953		1.72314
orf19.1721	C3_01300C_A	NCE103		0.78158	3.33758	1.29604e-05	0.000134826		1.71901
orf19.6264.3	C1_06480C_A			0.780171	3.00941	3.60207e-06	4.53309e-05		1.71733
orf19.2425	CR_03040C_A	HGT18		0.778747	2.20177	0.000772057	0.00417096		1.71564
orf19.457	CR_05980W_A			0.778606	5.01658	1.17239e-09	4.12925e-08		1.71547
orf19.827	C2_03970W_A			0.778046	2.03565	0.000428001	0.00257085		1.71481
orf19.6117	CR_07480W_A			0.775344	3.64658	3.10952e-06	4.04462e-05		1.7116
orf19.7513	CR_00210W_A	ALK2		0.773011	3.46174	1.23323e-06	1.86844e-05		1.70883
orf19.6850	C1_04560W_A			0.772315	0.945652	0.0162553	0.0493666		1.70801
orf19.5210	C2_05860C_A			0.771722	1.12259	0.00992932	0.0333372		1.70731
orf19.5589	C6_03070C_A			0.771675	0.667907	0.0479957	0.11519		1.70725
orf19.4842	C1_09770W_A			0.771346	0.784446	0.020361	0.0587748		1.70686
orf19.1224	C2_06680W_A	FRP3		0.770338	3.38233	5.26634e-07	9.09701e-06		1.70567
orf19.2613	CR_02130W_A	ECM4		0.77008	3.6323	3.68923e-06	4.63204e-05		1.70536
orf19.3545	C2_05140W_A	CDC15		0.769706	3.79571	6.49317e-07	1.09376e-05		1.70492
orf19.6008	C3_05290C_A			0.769048	0.946602	0.0164437	0.0497534		1.70415
orf19.2966	C1_02780W_A			0.768288	2.7403	0.00114045	0.00572759		1.70325
orf19.3663.1	C1_02060W_A			0.767728	0.912028	0.0165723	0.0500212		1.70259
orf19.2810	C3_03990C_A	AAP1		0.763986	2.97882	3.20246e-05	0.000288541		1.69818
orf19.2805	C3_04030C_A	PEX8		0.762503	2.42017	0.00109189	0.00552464		1.69643
orf19.6988	C3_05530W_A	OST1		0.762067	5.11745	3.22578e-11	1.52258e-09		1.69592
orf19.2602	CR_02020C_A	OPT1		0.759237	2.28096	0.00074016	0.00403886		1.6926
orf19.577	C5_00750C_A			0.758625	3.80582	8.17338e-06	9.12189e-05		1.69188
orf19.2758	C4_02440C_A	PGA38		0.758486	5.5985	1.95804e-06	2.78751e-05		1.69171
orf19.5506	C7_03710C_A	PLC1		0.75657	3.1626	3.85444e-05	0.000336658		1.68947
orf19.3697	C7_02670W_A			0.754437	1.7766	0.00556328	0.0209842		1.68697
orf19.4786	C1_09270W_A	FGR43		0.754293	0.879557	0.0267644	0.0731705		1.6868
orf19.6306	CR_04870C_A			0.753821	1.45355	0.00435641	0.0172602		1.68625
orf19.486	CR_04030W_A	NIP100		0.753554	2.50153	9.73906e-05	0.000747166		1.68594
orf19.3007.2	C1_03150C_A			0.753225	1.1902	0.0118823	0.0386103		1.68556
orf19.5514	C6_02450W_A			0.752607	0.657198	0.133391	0.253508		1.68483
orf19.1978	C5_00890C_A	GIT2		0.752131	3.66921	1.24072e-05	0.000129916		1.68428
orf19.4530.1	C1_01930W_A			0.7517	2.23551	0.00157171	0.00743239		1.68378
orf19.4257	C5_02470W_A	INT1		0.750918	4.74268	3.25059e-10	1.22439e-08		1.68286
orf19.2248	C2_06940C_A	ARE2		0.748526	2.0466	0.0031882	0.0133845		1.68007
orf19.5076.1	C1_08040W_A			0.747724	1.15878	0.0109947	0.0363629		1.67914
orf19.20	C2_06420C_A	RTS1		0.746469	6.14604	8.68961e-12	4.62083e-10		1.67768
orf19.6703	C7_03680W_A			0.745399	1.8279	0.00347009	0.0143897		1.67644
orf19.7487	CR_00470W_A			0.745325	5.83779	2.73272e-06	3.65081e-05		1.67635
orf19.5537	C6_02670C_A	WSC2		0.740859	5.49757	3.34698e-12	1.97326e-10		1.67117
orf19.7106	C7_00170W_A	VPS70		0.740733	4.17128	1.30904e-07	2.76274e-06		1.67103
orf19.6627	CR_05860W_A			0.740372	2.88177	0.00012263	0.00090006		1.67061
orf19.7531	CR_00090C_A			0.738899	3.20342	4.88163e-06	5.8971e-05		1.6689
orf19.505	CR_04190W_A	SRV2		0.734978	6.08736	9.48877e-14	6.86228e-12		1.66437
orf19.7350	C3_05710W_A	RCT1		0.733652	3.83486	6.17447e-06	7.20222e-05		1.66284
orf19.7365	C3_05850W_A			0.733044	1.35055	0.0122306	0.0394836		1.66214
orf19.5857	C3_04130W_A			0.732853	2.66664	7.62999e-05	0.000601527		1.66192
orf19.3166	C5_02050W_A			0.73243	5.37429	9.9124e-11	4.32044e-09		1.66144
orf19.2062	C2_00660C_A	SOD4		0.730605	3.35347	6.99698e-06	8.00667e-05		1.65933
orf19.2166	C2_08190W_A	VMA5		0.730565	3.44422	2.81165e-05	0.000257608		1.65929
orf19.2341	C1_10780C_A	HNT1		0.728684	2.93253	0.00073165	0.00400397		1.65713
orf19.2016	C2_01090C_A	ERG28		0.728636	0.695971	0.0730738	0.160988		1.65707
orf19.5395	C3_00630W_A			0.723762	4.03607	3.12718e-06	4.05785e-05		1.65148
orf19.3932	C5_04470C_A			0.723712	2.33132	0.022777	0.0642447		1.65143
orf19.7579	CR_10030W_A	FGR34		0.722316	3.29504	0.000103295	0.000786897		1.64983
orf19.2437	C1_06080C_A	ARC35		0.721595	1.75331	0.00554482	0.0209583		1.649
orf19.5686	C5_00100C_A			0.721304	2.61418	0.000589338	0.00335774		1.64867
orf19.3066	C1_03680W_A	ENG1		0.721122	4.95615	6.02703e-10	2.22385e-08		1.64846
orf19.524	CR_04350C_A			0.720963	1.79938	0.00660867	0.0242507		1.64828
orf19.1064	C1_04290C_A	ACS2		0.720426	8.7191	8.52251e-16	7.97001e-14		1.64767
orf19.6699	C7_03650W_A			0.720156	2.65252	0.000344352	0.00213703		1.64736
orf19.7436.1	C3_06480C_A	ECM15		0.71976	3.09519	3.26431e-05	0.000293139		1.64691
orf19.7680	CR_10860C_A	CTA26		0.719547	2.14884	0.000969728	0.00502074		1.64666
orf19.6232	C1_06780W_A	NPR1		0.719371	5.07842	1.28731e-10	5.41267e-09		1.64646
orf19.6684	C7_03520W_A	PNC1		0.719325	1.67811	0.00872841	0.0300781		1.64641
orf19.1448.1	C2_01440C_A			0.717072	1.45267	0.0521603	0.123222		1.64384
orf19.4609	C4_01840C_A			0.715687	4.88183	3.9059e-09	1.2071e-07		1.64227
orf19.5157	C7_03040W_A			0.714983	0.214527	0.180997	0.313851		1.64146
orf19.6880	C2_05680W_A	COG4		0.714937	3.97313	1.35051e-07	2.80657e-06		1.64141
orf19.3516	CR_05450C_A			0.713803	3.36325	6.74523e-06	7.76775e-05		1.64012
orf19.156	C2_04720C_A	FGR51		0.713783	3.69045	5.75702e-06	6.81792e-05		1.6401
orf19.7218	C1_14120C_A	RBE1		0.713056	3.64275	2.37201e-06	3.28463e-05		1.63927
orf19.252	C3_02620C_A			0.712571	0.482793	0.0639714	0.14512		1.63872
orf19.3235	CR_01180W_A			0.712319	2.17784	0.00125625	0.00623984		1.63844
orf19.882	C2_03390C_A	HSP78		0.711978	5.81147	2.97221e-10	1.1353e-08		1.63805
orf19.2791	C1_07540C_A	BBC1		0.711777	5.13729	9.70422e-11	4.27933e-09		1.63782
orf19.3767	C1_12490W_A	PEP1		0.709588	5.78831	1.20021e-08	3.30454e-07		1.63534
orf19.4132	C5_01420W_A			0.708932	1.61122	0.0066396	0.0243332		1.63459
orf19.5806	C2_02970C_A	ALD5		0.708096	8.3556	3.9322e-12	2.26896e-10		1.63365
orf19.5179	C7_02830C_A	LIP5		0.7072	1.77929	0.0108534	0.0359833		1.63263
orf19.5308	C4_04020C_A			0.706653	0.599719	0.0460676	0.111949		1.63201
orf19.4557				0.706443	3.0137	2.4557e-05	0.00022965		1.63178
orf19.1430	C4_04190C_A			0.705899	1.08908	0.0407127	0.101296		1.63116
orf19.4829	C1_09660W_A	DOA1		0.70548	4.78996	2.63966e-09	8.57335e-08		1.63069
orf19.4246	C5_02380W_A			0.705053	5.14151	2.81233e-09	9.0261e-08		1.6302
orf19.2035	C2_00890W_A			0.703963	2.36818	0.000610202	0.00344764		1.62897
orf19.86	C6_00850W_A			0.703108	3.13353	0.000892736	0.0046851		1.62801
orf19.419	C1_05440C_A			0.702086	1.37672	0.0469152	0.113436		1.62685
orf19.4918	C1_12880C_A			0.700037	0.254025	0.101461	0.206655		1.62455
orf19.1777	C2_10050W_A			0.696758	4.36394	2.65373e-06	3.57965e-05		1.62086
orf19.4127	C2_04850C_A			0.696498	4.37418	3.70143e-08	9.1257e-07		1.62057
orf19.4732	C1_08740C_A	SEC24		0.695861	7.46033	6.04982e-14	4.55753e-12		1.61985
orf19.854	C2_03640W_A	UGA11		0.695623	2.42246	0.0010013	0.00513331		1.61958
orf19.903	C2_03270W_A	GPM1		0.695141	7.7933	2.21095e-08	5.79334e-07		1.61904
orf19.4610	C4_01830C_A			0.692561	2.50635	0.000457014	0.00271209		1.61615
orf19.5921	C3_04630W_A			0.691116	3.16792	0.000119476	0.000882882		1.61453
orf19.6724	C3_07640C_A	FUM12		0.68785	8.08283	1.06862e-09	3.86414e-08		1.61088
orf19.7038	C7_00790W_A			0.687304	1.95725	0.00399509	0.016123		1.61027
orf19.3629	C2_08490W_A	DSE1		0.686881	2.95234	0.000690615	0.00381845		1.6098
orf19.2199	C2_07820C_A	PHO86		0.686625	4.03274	0.000524949	0.00304201		1.60951
orf19.3573	C2_05440W_A	PEX6		0.685041	2.85687	0.0014456	0.00696971		1.60775
orf19.3048	C1_03460C_A			0.684294	4.17178	1.48065e-06	2.21853e-05		1.60692
orf19.2844	CR_02870W_A	APL4		0.684004	4.18898	1.97067e-07	3.95886e-06		1.60659
orf19.1258	C4_05730W_A			0.682095	0.73503	0.0533543	0.125496		1.60447
orf19.4765	C1_09080C_A	PGA6		0.681411	6.02081	4.95119e-09	1.47556e-07		1.60371
orf19.4614	C4_01790W_A			0.680778	2.27978	0.00149291	0.00715072		1.603
orf19.3234	CR_01200W_A	OYE22		0.679557	0.831596	0.0413469	0.102639		1.60165
orf19.7380	C3_05990C_A			0.678635	0.797051	0.037724	0.0953818		1.60062
orf19.4395	CR_03520C_A			0.678599	5.37409	1.39701e-10	5.74043e-09		1.60058
orf19.3100	C4_07080C_A			0.678396	4.47609	1.1394e-08	3.18157e-07		1.60036
orf19.3804	C4_04760C_A			0.677789	3.62715	4.28093e-05	0.000367984		1.59969
orf19.3207	C5_01680C_A	CCN1		0.673875	3.84692	8.74451e-07	1.40326e-05		1.59535
orf19.2593	CR_01930C_A	BIO2		0.673429	1.33378	0.0289568	0.0777533		1.59486
orf19.4135	C5_01450W_A	PRC2		0.670991	0.144465	0.197235	0.333792		1.59217
orf19.5285	CR_05390W_A	PST3		0.670515	6.15509	1.21823e-06	1.8509e-05		1.59164
orf19.242.2	C3_02530W_A			0.670404	0.285445	0.183943	0.316933		1.59152
orf19.6531.1	C7_01890C_A	TOM7		0.66992	3.71611	0.0747806	0.163772		1.59098
orf19.4966	C1_13400C_A	AGC1		0.669447	4.40002	1.2637e-06	1.90928e-05		1.59046
orf19.7032	C7_00850W_A			0.667305	2.33592	0.00536502	0.0204353		1.5881
orf19.3086	C4_07190W_A	SEC10		0.664985	6.41741	3.35494e-07	6.08647e-06		1.58555
orf19.1474	C2_01640W_A	SLA1		0.664241	7.11232	1.27172e-10	5.38892e-09		1.58473
orf19.1631	C3_02150C_A	ERG6		0.663761	5.99143	6.59271e-05	0.000531335		1.58421
orf19.896	C2_03320W_A	CHK1		0.662472	4.26172	5.52915e-07	9.49053e-06		1.58279
orf19.1061	C1_04260W_A	HHT21		0.662076	6.76027	1.34797e-08	3.65568e-07		1.58236
orf19.5209	C2_05850C_A			0.661038	2.95859	0.00151725	0.00723795		1.58122
orf19.2937	C1_02480W_A	PMM1		0.660965	2.94795	0.00028921	0.00184767		1.58114
orf19.7452	C3_06630W_A			0.660955	2.46658	0.00546812	0.0207551		1.58113
orf19.782	C1_04640W_A			0.66068	3.94684	9.80375e-07	1.54132e-05		1.58083
orf19.2903	C4_06340W_A	AGO1		0.659275	4.3413	0.000199225	0.00135302		1.57929
orf19.1853	CR_06810W_A	HHT2		0.658773	6.60295	1.45687e-10	5.94139e-09		1.57874
orf19.7444	C3_06550C_A			0.656452	1.23603	0.0212244	0.0607499		1.5762
orf19.2921	C4_06160W_A			0.655012	2.00714	0.00994948	0.0333535		1.57463
orf19.8	CR_07110C_A			0.65399	1.08063	0.03825	0.096452		1.57351
orf19.448	C1_05170C_A	CUE5		0.653264	5.68593	6.01452e-07	1.02266e-05		1.57272
orf19.290	C3_02960C_A	KRE5		0.653027	4.57952	1.55268e-06	2.29475e-05		1.57246
orf19.5578	C6_02990W_A			0.652022	2.5262	0.0027906	0.0119465		1.57137
orf19.7148	C7_04250W_A	TPO2		0.651605	1.30966	0.0383448	0.096601		1.57091
orf19.4043	C5_05440C_A			0.651009	5.25697	5.92691e-07	1.01093e-05		1.57027
orf19.5468	C3_00050C_A			0.65047	0.710282	0.0642187	0.145559		1.56968
orf19.164	CR_02570C_A			0.650259	3.70957	4.80613e-06	5.84494e-05		1.56945
orf19.2608	CR_02070C_A	ADH5		0.649431	3.28015	0.00036713	0.00224164		1.56855
orf19.6884	C2_05730C_A	GWT1		0.649201	4.08882	1.54636e-05	0.000156323		1.5683
orf19.6435	CR_08610W_A			0.648541	4.2398	2.07603e-06	2.9324e-05		1.56758
orf19.4524				0.647343	2.69718	0.000850006	0.0045156		1.56628
orf19.3839	C4_04470W_A	SAP10		0.646856	3.73693	1.48014e-05	0.000150624		1.56575
orf19.7437	C3_06490W_A			0.644077	2.66486	0.00129556	0.00640576		1.56274
orf19.4384.1	CR_03580C_A			0.643795	6.47634	4.78738e-06	5.83522e-05		1.56243
orf19.4674.1	C4_01160W_A	CRD2		0.642793	4.72494	0.0582425	0.134643		1.56135
orf19.4003	C5_05110C_A	TIP20		0.642506	3.86134	2.03382e-05	0.000198051		1.56104
orf19.2525	CR_01400W_A	LYS12		0.642149	5.8044	1.04194e-08	2.94347e-07		1.56065
orf19.1240	C4_05590W_A			0.641635	5.91897	1.26026e-07	2.68064e-06		1.5601
orf19.2808	C3_04020C_A	ZCF16		0.640083	1.59243	0.0151457	0.0467267		1.55842
orf19.1267.1	C4_05820W_A			0.639842	1.97519	0.0184682	0.0546789		1.55816
orf19.1237	C4_05560C_A	ARO9		0.639395	1.226	0.024405	0.0680578		1.55768
orf19.5102	C1_08230C_A	PLB5		0.639133	2.05085	0.00418988	0.0167843		1.55739
orf19.703	CR_06690C_A			0.63818	3.80325	8.03235e-06	8.98298e-05		1.55636
orf19.842	C2_03790C_A	ASR3		0.636353	3.77501	6.78793e-05	0.000545448		1.5544
orf19.6745	C3_07440W_A	TPI1		0.635939	6.16128	2.60976e-07	5.00189e-06		1.55395
orf19.7261	C1_14440C_A	GDI1		0.635837	7.86671	4.34418e-06	5.33096e-05		1.55384
orf19.3623	C2_08560W_A	SMC2		0.63494	3.02375	0.000171621	0.00119343		1.55287
orf19.3616	C2_08610W_A	ERG9		0.63474	3.61058	0.000178044	0.00123492		1.55266
orf19.6941	C3_03760W_A			0.634714	3.17484	5.57205e-05	0.00046354		1.55263
orf19.3931	C5_04440C_A	SFC1		0.633372	2.83131	0.000913394	0.00475887		1.55119
orf19.3021	C1_03270W_A			0.632982	0.706927	0.128469	0.246225		1.55077
orf19.4910	C1_10400C_A	FGR41		0.632381	4.23579	4.9787e-07	8.65527e-06		1.55012
orf19.2190	C2_07930C_A	VRP1		0.631664	4.46206	0.000294798	0.00187235		1.54935
orf19.1445	C2_01400C_A	ESC4		0.631114	2.66911	0.00535309	0.0204185		1.54876
orf19.6821	C3_06810W_A			0.630585	2.70755	0.00136565	0.00667925		1.54819
orf19.7166	C7_04090C_A			0.630367	3.74903	0.000243424	0.00158503		1.54796
orf19.886	C2_03380W_A	PAN1		0.630125	8.2213	3.4366e-09	1.08373e-07		1.5477
orf19.4271	C5_02580W_A			0.629435	3.36556	0.00375604	0.0152834		1.54696
orf19.775	C1_04700C_A			0.629424	1.04431	0.0493433	0.117798		1.54695
orf19.4128	C2_04830W_A			0.628849	2.22279	0.0173092	0.051813		1.54633
orf19.1462	C2_01550W_A	SMP2		0.626989	5.37698	1.61935e-09	5.55909e-08		1.54434
orf19.3074	C4_07250C_A	TLO10		0.625944	4.41998	4.31319e-05	0.000369002		1.54322
orf19.6851	C1_04570C_A	CHL4		0.625429	1.98786	0.00569738	0.0214304		1.54267
orf19.6484	C7_02280W_A			0.625159	0.387183	0.109836	0.219186		1.54238
orf19.1254	C4_05690W_A	SEC23		0.624632	7.2343	4.62701e-12	2.56091e-10		1.54182
orf19.6517	C7_02020W_A	RAD14		0.62445	3.25996	0.000424026	0.00255546		1.54162
orf19.3247	CR_01080W_A			0.624026	3.6867	0.00188385	0.00864467		1.54117
orf19.5518	C6_02490C_A			0.624018	4.19141	0.000345551	0.00214202		1.54116
orf19.1149	C1_11700C_A	MRF1		0.623961	2.87555	0.00337817	0.0140731		1.5411
orf19.3940.1	C5_04560C_A	CUP1		0.623891	1.78799	0.0425648	0.105228		1.54103
orf19.1564	C2_02410W_A			0.623724	3.76529	1.15642e-05	0.000122508		1.54085
orf19.4055	C5_05510C_A			0.622479	1.26537	0.0311537	0.0825082		1.53952
orf19.1725	C3_01260C_A			0.621673	4.94972	3.29372e-06	4.22344e-05		1.53866
orf19.7537	CR_00070W_A	BNR1		0.621186	5.67678	6.97482e-08	1.58956e-06		1.53814
orf19.5338	C2_10590W_A	GAL4		0.61992	6.17368	2.67746e-06	3.58582e-05		1.53679
orf19.6112				0.619869	5.29925	3.8314e-05	0.000335186		1.53674
orf19.5379	C3_00760W_A	ERG4		0.619621	4.92591	3.41327e-05	0.0003045		1.53647
orf19.5259	C1_12060C_A			0.619225	2.15866	0.00412592	0.0165893		1.53605
orf19.4551				0.618943	0.692714	0.0815868	0.174843		1.53575
orf19.5337	C2_10580W_A	UBC15		0.616833	3.18533	0.00021458	0.00143335		1.53351
orf19.7421	C3_06360C_A	CYP5		0.616311	7.24873	1.74629e-07	3.53429e-06		1.53295
orf19.6007	C3_05280C_A			0.614994	5.33562	2.42821e-07	4.73762e-06		1.53155
orf19.6869	C2_05570C_A			0.614855	3.90062	0.000117453	0.000870279		1.5314
orf19.3264.1	CR_00910W_A			0.614729	3.1605	0.00554216	0.0209583		1.53127
orf19.5655	C4_00290C_A			0.614351	0.585733	0.0929798	0.193672		1.53087
orf19.5859	C3_04160W_A	DAL8		0.613707	0.845578	0.0946913	0.196483		1.53019
orf19.925	C5_00640C_A	SAM51		0.611954	4.83486	2.877e-06	3.81536e-05		1.52833
orf19.6247	C1_06630W_A			0.611007	3.8973	9.71314e-05	0.000746233		1.52732
orf19.489	CR_04060C_A	DAP1		0.610847	4.85851	2.55888e-05	0.00023766		1.52716
orf19.2065	C2_00630C_A			0.608884	1.81652	0.0317081	0.0836094		1.52508
orf19.5005	C1_13670W_A	OSM2		0.607242	3.37718	0.000195009	0.00133383		1.52334
orf19.4893	C1_10230C_A			0.60713	4.49314	2.37385e-06	3.28463e-05		1.52323
orf19.277	C3_02860W_A	THI6		0.606788	2.08824	0.00666514	0.0243939		1.52286
orf19.3496	C6_02120W_A	CHC1		0.606467	7.61286	4.01119e-08	9.8003e-07		1.52253
orf19.4505	C2_04470W_A	ADH3		0.606431	0.655346	0.0793095	0.171142		1.52249
orf19.4676	C4_01140C_A			0.606289	2.36177	0.0140968	0.0440584		1.52234
orf19.6640	CR_05720W_A	TPS1		0.605523	3.40927	0.00154221	0.00731843		1.52153
orf19.6553	C7_01710W_A			0.604008	4.63459	0.0111202	0.0366438		1.51993
orf19.1656	C3_01900C_A			0.601797	4.32978	1.73687e-06	2.51892e-05		1.51761
orf19.4597	C4_01950W_A			0.599673	4.70287	4.04686e-07	7.17325e-06		1.51537
orf19.2598	CR_01970C_A	VMA4		0.599581	6.80018	1.79011e-10	7.13939e-09		1.51528
orf19.1161	C1_11590W_A	PLD1		0.598609	6.85442	6.83642e-08	1.56459e-06		1.51426
orf19.5054	C1_07840W_A			0.598126	4.25946	2.07441e-05	0.000200207		1.51375
orf19.6830	C3_06730W_A			0.597757	0.888391	0.119961	0.233717		1.51336
orf19.3225	CR_01290C_A	CWH43		0.597677	6.1222	9.21244e-08	2.04788e-06		1.51328
orf19.6005	C3_05270C_A	HGT5		0.596384	1.97454	0.0268791	0.0733626		1.51192
orf19.6536	C7_01840W_A	IQG1		0.59601	3.21482	0.00153395	0.00728561		1.51153
orf19.853	C2_03670W_A	SAP99		0.595842	0.376531	0.138517	0.260512		1.51135
orf19.1037	C1_03720C_A			0.595505	1.87689	0.0105647	0.0351769		1.511
orf19.6055				0.59484	4.35987	8.14713e-07	1.33505e-05		1.51031
orf19.3983	C5_04950C_A			0.594089	3.80835	0.000400489	0.00243253		1.50952
orf19.3876	CR_06240C_A	ZCF19		0.593789	0.144205	0.170207	0.3017		1.5092
orf19.2565	CR_01720W_A			0.593445	3.14801	0.00627447	0.0231673		1.50885
orf19.5974	C3_05040C_A	ATG9		0.593357	2.73192	0.000991606	0.00509808		1.50875
orf19.2599	CR_01980C_A	CRC1		0.592782	5.85442	2.40928e-09	7.87226e-08		1.50815
orf19.231	C3_02430W_A	APL2		0.592572	5.01105	7.34074e-08	1.65901e-06		1.50793
orf19.6645	CR_05670C_A	HMO1		0.591539	5.10771	3.76891e-06	4.71027e-05		1.50685
orf19.7276.1	C1_14590C_A	TLO4		0.591439	2.46308	0.0123457	0.0397642		1.50675
orf19.908	C2_03230C_A	FEN12		0.590933	6.15872	2.19405e-09	7.21245e-08		1.50622
orf19.3852	CR_06030C_A			0.590809	1.38065	0.0597334	0.13746		1.50609
orf19.5830	C2_02760W_A	LHS1		0.590235	6.74982	5.40751e-08	1.27523e-06		1.50549
orf19.135	C6_01280W_A	EXO84		0.590031	3.81952	3.76623e-05	0.000330017		1.50528
orf19.5508	C7_03690W_A			0.589685	0.339009	0.168787	0.30017		1.50492
orf19.403	C1_08570C_A	PCL2		0.588681	2.67372	0.00204842	0.00922692		1.50387
orf19.1699	C3_01500C_A	BZZ1		0.587236	4.16079	0.000106509	0.000804603		1.50237
orf19.4865	C1_09990W_A	SAC1		0.586376	3.32719	0.000208118	0.00140227		1.50147
orf19.2177	C2_08090W_A			0.5856	2.2756	0.00825795	0.0288417		1.50066
orf19.4411	C4_06010C_A	HOS1		0.584506	2.01851	0.0174638	0.0521794		1.49953
orf19.1680	C3_01630W_A	TFP1		0.584468	7.19311	1.08356e-09	3.89221e-08		1.49949
orf19.2885	C4_06490C_A	PRI2		0.584242	1.28658	0.0413686	0.102646		1.49925
orf19.3269	CR_00850C_A	GSL2		0.58157	4.07431	0.00010758	0.000811567		1.49648
orf19.7292	CR_08950W_A	ARP2		0.581407	6.52905	4.03691e-09	1.23012e-07		1.49631
orf19.4015	C5_05220W_A	CAG1		0.581215	0.640488	0.0947784	0.196588		1.49611
orf19.6729	C3_07610W_A	TIP120		0.58121	5.3219	2.83624e-07	5.30252e-06		1.4961
orf19.4384	CR_03450W_A	HXT5		0.580876	6.84946	1.09251e-06	1.69792e-05		1.49576
orf19.1442	C2_01380W_A	PLB4.5		0.579749	2.19379	0.0137473	0.0432028		1.49459
orf19.201	C2_09030W_A			0.579746	1.39748	0.0347625	0.0898295		1.49459
orf19.6184	C3_07880C_A			0.579444	4.10582	0.00111494	0.00561508		1.49427
orf19.7586	CR_10110W_A	CHT3		0.578662	5.51482	1.07686e-07	2.33635e-06		1.49346
orf19.6077				0.578083	2.8685	0.00239718	0.0105262		1.49286
orf19.3919.1	C5_04330W_A			0.577882	3.39938	0.00154686	0.00733406		1.49266
orf19.1112	C5_03820C_A	BUD7		0.577879	4.59417	3.02614e-06	3.96213e-05		1.49265
orf19.1321	C4_03570W_A	HWP1		0.577282	1.76043	0.0559294	0.130647		1.49204
orf19.1406	C2_09480W_A			0.577282	1.16663	0.109205	0.218652		1.49204
orf19.7060	C7_00590W_A			0.576933	2.17678	0.0107745	0.0357655		1.49167
orf19.2131	C6_04470C_A			0.57629	5.31331	3.20881e-06	4.14395e-05		1.49101
orf19.6973	C3_05360C_A			0.576092	2.5603	0.00302335	0.0128015		1.49081
orf19.4719	C4_06100W_A	CWH41		0.574148	4.82937	9.60033e-06	0.000105196		1.4888
orf19.5597.1	C6_03130W_A			0.572903	3.70231	0.142635	0.26586		1.48751
orf19.1212	C6_04100W_A			0.572812	6.52194	2.29715e-08	5.96159e-07		1.48742
orf19.1266	C4_05800C_A			0.572711	1.07093	0.109827	0.219186		1.48732
orf19.7446	C3_06570C_A	OPI3		0.572597	3.22828	0.000323219	0.00201975		1.4872
orf19.3658	C6_00710W_A			0.572513	2.65952	0.00699272	0.0252463		1.48711
orf19.305	C3_03080W_A			0.572249	3.55761	0.00125413	0.00623501		1.48684
orf19.1589.1	C2_02640C_A			0.571717	1.43106	0.0369022	0.0939266		1.48629
orf19.2289	C2_07320W_A	ARP3		0.57141	6.40119	1.67315e-09	5.67198e-08		1.48597
orf19.5517	C6_02480W_A			0.570539	3.75622	0.000509595	0.00298473		1.48508
orf19.3937	C5_04520W_A	TIP41		0.570472	3.17765	0.000452284	0.0026904		1.48501
orf19.345	C3_03470W_A			0.569947	2.30826	0.0211487	0.0605652		1.48447
orf19.7632	CR_10530W_A			0.569653	3.06693	0.000510461	0.00298473		1.48417
orf19.4054	C5_05500C_A	CTA24		0.569178	4.73695	0.000477324	0.00281414		1.48368
orf19.2238	C2_06860W_A	LTE1		0.567447	4.1078	0.00063167	0.00353944		1.4819
orf19.1110	C5_03840W_A			0.566431	1.41098	0.0471724	0.113869		1.48086
orf19.6440	CR_08650C_A			0.565283	4.7642	6.27509e-07	1.06363e-05		1.47968
orf19.1595	C4_03920W_A			0.564839	3.57964	0.00101593	0.00519444		1.47922
orf19.1516	C2_02020W_A			0.564157	5.36365	3.60101e-07	6.4675e-06		1.47852
orf19.1823	C1_06270W_A			0.563075	3.21969	0.000980496	0.00506496		1.47742
orf19.1585	C2_02590W_A	ZRT2		0.562121	4.98357	4.69955e-05	0.000398287		1.47644
orf19.313	C3_03140C_A	DAL4		0.561843	3.18241	0.00683075	0.0247389		1.47615
orf19.6706	C7_03490W_A	GYP7		0.56115	3.24628	0.000808638	0.00432123		1.47544
orf19.590	CR_08050C_A			0.559686	5.62217	8.2416e-06	9.17914e-05		1.47395
orf19.5246	C1_12180C_A			0.558862	2.46299	0.00765116	0.0272121		1.47311
orf19.3051	C1_03490W_A			0.558256	5.20541	2.63642e-07	5.00958e-06		1.47249
orf19.4477	C1_04020C_A	CSH1		0.557597	1.7176	0.0378874	0.0957156		1.47182
orf19.4368	CR_03690W_A			0.557233	0.55741	0.127262	0.244786		1.47144
orf19.1477	C2_01660C_A			0.555919	0.639919	0.20132	0.338804		1.4701
orf19.6809	C3_06920W_A			0.555449	3.21877	0.000576176	0.00328966		1.46963
orf19.6472	C7_02380C_A	CYP1		0.554293	9.11647	9.18545e-09	2.6222e-07		1.46845
orf19.1089	C6_04310W_A	PEX11		0.553753	1.18052	0.0563765	0.131458		1.4679
orf19.1655.3	C3_01910C_A			0.55361	0.797419	0.109953	0.21934		1.46775
orf19.6500	C7_02150C_A	ECM42		0.553198	1.98093	0.0234176	0.0657616		1.46734
orf19.5137.1	C7_03180C_A	HHO1		0.552974	4.38508	9.99932e-06	0.00010869		1.46711
orf19.1738.1	CR_04650W_A			0.552973	4.14345	0.000107986	0.000812366		1.46711
orf19.3803	C4_04770C_A	MNN22		0.552705	2.44123	0.00480947	0.0186503		1.46683
orf19.4754	C1_08980C_A	ZWF1		0.552448	4.19329	0.000490336	0.00288146		1.46657
orf19.5242	C1_12220W_A	CDC6		0.552328	2.2168	0.0143305	0.0446717		1.46645
orf19.5543	C6_02720C_A			0.552062	3.37331	0.000569822	0.00326369		1.46618
orf19.4150	C5_01560C_A			0.551353	4.56928	1.89094e-06	2.71335e-05		1.46546
orf19.6313	CR_04800W_A	MNT4		0.551127	2.86235	0.00210228	0.00943159		1.46523
orf19.7201	C7_03810W_A	SLA2		0.550569	5.24278	3.22428e-06	4.15403e-05		1.46466
orf19.1854	CR_06800C_A	HHF22		0.550211	6.25394	5.19945e-08	1.23692e-06		1.4643
orf19.4903	C1_10320W_A			0.548447	1.01997	0.108246	0.217052		1.46251
orf19.4416	C4_06060W_A	VPS13		0.548344	6.04427	7.08506e-07	1.17521e-05		1.46241
orf19.5224	C1_12410C_A	PKH2		0.548082	4.96188	1.01373e-06	1.58915e-05		1.46214
orf19.5941	C3_04780C_A			0.547968	5.70252	1.35012e-07	2.80657e-06		1.46203
orf19.3549	C2_05190W_A	CDC21		0.547469	2.88937	0.0015905	0.00750161		1.46152
orf19.1390	C2_09640W_A	PMI1		0.547176	5.65977	1.66814e-06	2.42573e-05		1.46122
orf19.4346	C5_03140C_A			0.546443	7.62757	5.4753e-09	1.62284e-07		1.46048
orf19.4255	C5_02460C_A	ECM331		0.545547	1.05033	0.125203	0.242104		1.45957
orf19.539	CR_04480C_A	LAP3		0.544746	0.912024	0.113771	0.224851		1.45876
orf19.738	C4_05100C_A	MYO5		0.543549	5.69409	1.06052e-05	0.000113681		1.45755
orf19.894	C2_03340W_A			0.543007	3.71647	0.000351445	0.00217112		1.45701
orf19.5730	C6_03620C_A			0.542844	3.00618	0.000993128	0.00510107		1.45684
orf19.3030	C1_03330C_A			0.542843	2.72221	0.00521359	0.0199171		1.45684
orf19.6863	C4_05240C_A	VPH1		0.542221	6.73773	1.16969e-08	3.23693e-07		1.45621
orf19.2515	C3_01130C_A			0.54221	3.08874	0.0107728	0.0357655		1.4562
orf19.133	C6_01250W_A			0.542016	2.40187	0.0239402	0.066934		1.45601
orf19.2149	C6_04550C_A			0.540318	6.10995	4.29702e-05	0.000368782		1.45429
orf19.4927	C1_12960C_A	BNI1		0.540176	6.79382	6.39286e-09	1.87432e-07		1.45415
orf19.1411	C4_04360W_A			0.540159	1.26109	0.0554196	0.129623		1.45413
orf19.6924	C3_03910W_A	HTA1		0.539728	6.55702	2.53238e-05	0.000235602		1.4537
orf19.7114	C7_00090C_A	CSA1		0.53956	8.6462	4.41689e-09	1.32779e-07		1.45353
orf19.3677				0.53879	1.43776	0.0617099	0.14123		1.45275
orf19.7229	C1_14210C_A	IML2		0.537757	5.48373	1.17982e-06	1.80051e-05		1.45171
orf19.1246	C4_05610C_A			0.536188	5.91914	1.54294e-06	2.29475e-05		1.45014
orf19.6008.3				0.535379	1.38954	0.040745	0.10133		1.44932
orf19.2958				0.533888	1.42632	0.0719896	0.159246		1.44783
orf19.7490	CR_00420W_A			0.533727	1.74371	0.0580102	0.134178		1.44766
orf19.4308	C5_02840C_A	HSL1		0.533392	5.59656	2.79418e-07	5.24416e-06		1.44733
orf19.7178	C7_04020C_A	PRE5		0.53311	5.8667	4.4567e-07	7.84174e-06		1.44705
orf19.1052	C1_04180W_A			0.53293	6.24143	1.2944e-06	1.95023e-05		1.44686
orf19.6021				0.53048	1.38924	0.0522698	0.123427		1.44441
orf19.3233	CR_01210C_A	HSE1		0.530277	4.47825	0.000170268	0.00118553		1.44421
orf19.5064.1	C1_07920W_A			0.53025	3.27143	0.118201	0.231284		1.44418
orf19.3148	C2_06740W_A			0.530132	3.71378	0.000908857	0.00474004		1.44406
orf19.3764	C1_12520W_A	GSG1		0.528764	3.58414	0.000541694	0.00313236		1.44269
orf19.7030	C7_00860W_A	SSR1		0.528542	5.19481	0.0469901	0.11353		1.44247
orf19.1359	C2_09930W_A			0.527789	3.45149	0.00151613	0.00723795		1.44172
orf19.1887	C2_07440C_A			0.527386	2.7947	0.0026984	0.0116252		1.44131
orf19.1424	C4_04250W_A			0.526409	1.77423	0.0506104	0.120347		1.44034
orf19.1400	C2_09560C_A			0.52628	2.5305	0.0106176	0.0353311		1.44021
orf19.7056	C7_00630C_A			0.524957	5.16589	1.64445e-06	2.40418e-05		1.43889
orf19.371	C4_00050W_A			0.523432	4.05274	0.00483881	0.0187202		1.43737
orf19.5873	C3_04300C_A	POL1		0.522293	6.16607	6.57329e-08	1.52365e-06		1.43624
orf19.4511	C2_04410W_A			0.522217	2.06439	0.0354128	0.0909035		1.43616
orf19.3944	C5_04600C_A	GRR1		0.521852	6.10179	2.60177e-07	5.00189e-06		1.4358
orf19.7017	C7_00970C_A	YOX1		0.521555	4.23282	0.000105525	0.000798279		1.4355
orf19.1373	C2_09770C_A	INP51		0.521406	4.09961	8.05933e-05	0.000632616		1.43535
orf19.6190	C3_07950C_A	SRB1		0.519515	9.78387	6.25151e-05	0.000510665		1.43347
orf19.2706	C4_02900C_A	CRH11		0.518553	5.30937	5.00377e-06	6.01783e-05		1.43252
orf19.6753	C3_07380W_A			0.517889	3.97298	0.000381766	0.00232141		1.43186
orf19.2001	C2_01230W_A			0.517802	2.21218	0.0404566	0.100844		1.43177
orf19.5447	C3_00220W_A	HGT19		0.516781	2.42029	0.0314059	0.0830239		1.43076
orf19.6637	CR_05750W_A			0.516462	2.05749	0.021736	0.0618227		1.43044
orf19.1327	C4_03520C_A	RBT1		0.515343	2.55972	0.0200048	0.0580557		1.42933
orf19.4788	C1_09290C_A	ARG5,6		0.514521	2.87221	0.00735745	0.0263411		1.42852
orf19.6238	C1_06720C_A			0.514295	3.50992	0.00366294	0.0149832		1.4283
orf19.4109	C2_06100W_A	PMT4		0.514203	6.96828	2.66863e-08	6.73239e-07		1.4282
orf19.3001				0.514015	2.66276	0.00661262	0.0242507		1.42802
orf19.5796	C2_03050W_A	SHE9		0.513968	3.21024	0.00618767	0.0229562		1.42797
orf19.3226	CR_01280C_A			0.513504	2.14965	0.0910924	0.190546		1.42751
orf19.1881	C2_07480W_A	LPT1		0.512224	5.06443	2.98692e-06	3.92277e-05		1.42625
orf19.2516	C3_01140W_A			0.511324	4.18031	0.000187423	0.00129008		1.42536
orf19.6434	CR_08600C_A	PEX19		0.511076	5.91771	1.62704e-05	0.000163731		1.42511
orf19.5130	C7_03250C_A	PDI1		0.511042	8.6137	6.41669e-07	1.08424e-05		1.42508
orf19.1055	C1_04210C_A	CDC3		0.510782	6.23412	1.32663e-05	0.000137321		1.42482
orf19.5940	C3_04770C_A	ZCF32		0.510681	3.30929	0.00253962	0.0110731		1.42472
orf19.440	C1_05260C_A	SDH1		0.510366	4.53466	0.00135902	0.00665284		1.42441
orf19.3467	C6_02260C_A	SEC27		0.510229	7.03268	2.60156e-08	6.62483e-07		1.42428
orf19.5995	C3_05190C_A	MCA1		0.509973	5.38611	2.20875e-06	3.10369e-05		1.42402
orf19.6022				0.509557	3.21808	0.00358896	0.0147585		1.42361
orf19.1785	C2_09980W_A			0.509216	2.0704	0.0794045	0.171249		1.42328
orf19.5618	C6_03300C_A			0.509082	3.01361	0.00642926	0.0236583		1.42314
orf19.729.1	CR_07560W_A	RGD3		0.508767	4.8733	0.00171838	0.00802109		1.42283
orf19.2343.1	C1_10750C_A			0.508521	3.93273	0.00190137	0.0087014		1.42259
orf19.1618	C3_02280C_A	GFA1		0.508134	5.99246	2.50547e-06	3.44043e-05		1.42221
orf19.5191	C7_02750W_A	FGR6-1		0.508003	1.24449	0.0704901	0.156744		1.42208
orf19.3462	C6_02220W_A	SAR1		0.507775	5.76189	0.00218041	0.00972576		1.42186
orf19.2828	CR_02690W_A			0.506522	2.67209	0.0185325	0.0548391		1.42062
orf19.5204	C2_05810W_A			0.505859	2.2427	0.0272353	0.0740442		1.41997
orf19.1317	C4_03590C_A	OSH3		0.505707	5.25809	9.77954e-05	0.000749212		1.41982
orf19.5947	C3_04820C_A	SEC7		0.505509	6.91555	4.89869e-07	8.54357e-06		1.41962
orf19.3461	C6_02210W_A			0.50509	0.23387	0.249895	0.396209		1.41921
orf19.2796	C1_07490C_A			0.504098	3.67872	0.00540776	0.0205548		1.41824
orf19.4478	C1_04030W_A			0.503911	4.92149	2.77637e-06	3.70001e-05		1.41805
orf19.3308				0.503764	5.04689	5.15229e-05	0.000431932		1.41791
orf19.6119	CR_07460C_A			0.5027	3.5824	0.000775802	0.00418702		1.41686
orf19.7112	C7_00100W_A	FRP2		0.502656	4.46293	0.000130253	0.000947043		1.41682
orf19.2098	C2_00340C_A	ARO8		0.502621	5.99652	3.93584e-05	0.000342665		1.41679
orf19.2484	C1_05670W_A			0.502157	5.5744	2.37006e-06	3.28463e-05		1.41633
orf19.1288	C3_00810C_A	FOX2		0.50207	3.39411	0.000843358	0.00449124		1.41624
orf19.3893	C5_04110W_A	SCW11		0.501013	5.08415	2.49324e-05	0.000232759		1.41521
orf19.687	C6_01960W_A			0.500364	3.64337	0.00214724	0.00960944		1.41457
orf19.5445	C3_00240C_A	GLO3		0.499638	7.61788	3.65918e-05	0.000323775		1.41386
orf19.3919	C5_04320C_A			0.498187	3.62605	0.000985228	0.00508456		1.41244
orf19.2340	C1_10790W_A	CDC48		0.497866	8.02292	3.28522e-07	5.99967e-06		1.41212
orf19.4795	C1_09340C_A			0.497708	0.856207	0.150914	0.276444		1.41197
orf19.3590	C2_08810C_A	IPP1		0.497164	8.84433	4.44215e-08	1.08046e-06		1.41144
orf19.1597	C2_09390W_A	ABG1		0.497004	5.98724	0.000151448	0.00107099		1.41128
orf19.7469	CR_00620C_A	ARG1		0.496454	2.18299	0.0234035	0.0657616		1.41074
orf19.351	C3_03530W_A			0.496191	0.484312	0.197688	0.334454		1.41048
orf19.4403	C4_05910C_A	VPS11		0.49619	3.63523	0.000692766	0.00382644		1.41048
orf19.780	C1_04660W_A	DUR1,2		0.495018	3.54524	0.00177781	0.00822766		1.40934
orf19.6596	CR_09670C_A			0.494987	3.31657	0.00148485	0.00712726		1.40931
orf19.4529				0.494287	3.92159	0.175036	0.307435		1.40862
orf19.6341	C1_12810W_A			0.494064	3.54855	0.0136666	0.0430474		1.40841
orf19.131	C6_01200W_A			0.493494	0.32483	0.202713	0.34024		1.40785
orf19.1210	C6_04110W_A			0.492695	4.83375	1.2979e-05	0.000134826		1.40707
orf19.7111.1	C7_00110W_A	SOD3		0.492625	0.485137	0.232406	0.376965		1.407
orf19.1077	C6_04210C_A	ATM1		0.492455	2.56534	0.020102	0.058257		1.40684
orf19.6219	C1_06920C_A			0.492215	4.29885	0.000100047	0.000765208		1.4066
orf19.3251	CR_01040C_A	ARC19		0.491786	2.06708	0.0361364	0.0925418		1.40618
orf19.2945				0.49153	1.92369	0.0266866	0.0730313		1.40594
orf19.1343	C7_03320C_A	MED16		0.489109	4.35399	0.000154942	0.00109235		1.40358
orf19.732	CR_07170W_A			0.489063	2.82524	0.00941105	0.0319463		1.40353
orf19.1847	CR_06860C_A	ARO10		0.48877	3.35598	0.00446794	0.0176063		1.40325
orf19.376	C4_00080C_A			0.488708	0.786048	0.163336	0.292581		1.40319
orf19.3453	C6_02140W_A			0.488421	4.9136	9.04455e-05	0.000702831		1.40291
orf19.1522	C2_02050C_A			0.486866	2.94701	0.0067695	0.0246263		1.4014
orf19.278	C3_02870C_A			0.486498	1.81093	0.0669895	0.15041		1.40104
orf19.1277	C4_05900C_A			0.486404	2.41812	0.0211246	0.0605283		1.40095
orf19.2078	C2_00490W_A			0.48637	4.68679	4.34362e-05	0.000371021		1.40092
orf19.4594	C4_01980C_A	CLC1		0.48516	6.39502	1.26511e-05	0.000132215		1.39974
orf19.5775	C6_03990C_A			0.484687	1.09104	0.150662	0.276347		1.39928
orf19.5370	C2_10870W_A			0.484606	3.88105	0.00746977	0.0266948		1.3992
orf19.3518	CR_05480W_A			0.483639	6.71856	1.58303e-07	3.24014e-06		1.39827
orf19.1367	C2_09840W_A	MTW1		0.48311	0.271381	0.236258	0.381193		1.39775
orf19.999	C1_10550C_A	GCA2		0.481632	1.44326	0.238525	0.383564		1.39632
orf19.3006				0.481562	5.78984	4.4965e-06	5.50542e-05		1.39625
orf19.7313	CR_09170C_A	SSU1		0.48143	5.38378	2.29642e-05	0.000217758		1.39613
orf19.4117	C2_06030W_A			0.481025	3.08898	0.0290877	0.0780402		1.39574
orf19.5089	C1_08130C_A	TERT		0.480627	2.95924	0.00339714	0.0141304		1.39535
orf19.4715	C4_06130W_A			0.480144	7.52178	1.40323e-07	2.905e-06		1.39488
orf19.97	C6_00960W_A	CAN1		0.480123	5.17585	7.13083e-06	8.09156e-05		1.39486
orf19.6048				0.478919	2.76511	0.0104529	0.0348473		1.3937
orf19.4070	C2_09120C_A			0.478666	0.470046	0.21537	0.356041		1.39345
orf19.5255	C1_12100C_A	PXA2		0.477907	4.4253	0.000298275	0.00189001		1.39272
orf19.7458	C3_06690C_A			0.477329	1.59973	0.0632958	0.144031		1.39216
orf19.446.2	C1_05180C_A			0.476531	3.25166	0.208358	0.347519		1.39139
orf19.2722	C4_02760C_A	CGR1		0.476096	2.18326	0.0301483	0.0801305		1.39097
orf19.3097	C4_07110C_A	PDA1		0.476059	8.88473	3.32325e-05	0.000297448		1.39094
orf19.5723	C6_03560W_A	POX1		0.475977	4.67293	0.00022734	0.00150011		1.39086
orf19.6254	C1_06570W_A	ANT1		0.475915	3.68941	0.00274332	0.0117813		1.3908
orf19.1527	C2_02110C_A			0.475703	0.937083	0.185088	0.318301		1.3906
orf19.7239	C1_14290C_A	MDG1		0.47552	7.83345	5.14844e-05	0.000431932		1.39042
orf19.4229	C5_02220C_A			0.475299	0.355652	0.256393	0.403329		1.39021
orf19.3414	C6_01720C_A	SUR7		0.474827	6.75964	2.9893e-07	5.51496e-06		1.38975
orf19.5718	C6_03520C_A			0.473865	2.44507	0.0800765	0.172219		1.38883
orf19.7553	CR_09810W_A			0.473598	0.8063	0.178307	0.310767		1.38857
orf19.6905	C7_01230C_A			0.473249	3.82178	0.00128134	0.00634123		1.38823
orf19.6868	C2_05560W_A			0.472534	2.55696	0.00975465	0.0328425		1.38754
orf19.807	C2_04140W_A	CHS5		0.47226	6.35973	7.61704e-05	0.00060138		1.38728
orf19.3447	C6_01370W_A			0.471799	2.23753	0.0216016	0.0615697		1.38684
orf19.3806	C4_04750W_A			0.47005	3.66727	0.000791752	0.00425194		1.38516
orf19.5645	C4_00200C_A	MET15		0.470022	4.73427	0.000262965	0.001698		1.38513
orf19.1672	C3_01720C_A			0.469442	7.00266	7.53644e-07	1.24248e-05		1.38457
orf19.4381	CR_03610C_A	VTC3		0.468987	6.07726	1.74893e-06	2.52965e-05		1.38414
orf19.3615	C2_08620W_A			0.468012	0.868089	0.189	0.322979		1.3832
orf19.4090	C2_09280C_A			0.467657	2.42305	0.0218206	0.0619334		1.38286
orf19.4777	C1_09190C_A	DAK2		0.46744	5.6634	6.33689e-05	0.00051454		1.38265
orf19.3661				0.466796	4.44154	0.000514273	0.00299294		1.38204
orf19.5943	C3_04800C_A			0.466062	2.98379	0.010826	0.0359146		1.38133
orf19.3972	C5_04860C_A			0.465211	1.42663	0.100218	0.205204		1.38052
orf19.1166	C1_11540C_A	CTA3		0.464896	7.21157	2.65966e-06	3.57965e-05		1.38022
orf19.5897	C3_04460W_A			0.46421	5.18552	6.81006e-05	0.000546416		1.37956
orf19.2344	C1_10740C_A	ASR1		0.464184	2.18673	0.101276	0.206635		1.37954
orf19.3211	C5_04000W_A	RFC3		0.463815	3.92489	0.00227335	0.0100658		1.37918
orf19.5073	C1_08010W_A	DPM1		0.463256	5.4144	9.95213e-06	0.000108612		1.37865
orf19.658	C1_11440C_A	GIN1		0.463226	4.83146	0.000125007	0.000913797		1.37862
orf19.638	CR_05170C_A	FDH1		0.463074	1.49036	0.0853152	0.181328		1.37848
orf19.4192	C6_00670W_A	CDC14		0.463026	4.34326	0.000199988	0.00135592		1.37843
orf19.6396	CR_08300C_A			0.462961	6.42755	2.06272e-06	2.9212e-05		1.37837
orf19.4928	C1_12970C_A	SEC2		0.462484	4.74303	7.44681e-05	0.000589657		1.37791
orf19.5572	C6_02940C_A			0.462408	4.95927	0.00422224	0.0168765		1.37784
orf19.209	C2_08970C_A	DFG10		0.460627	2.01494	0.119104	0.232548		1.37614
orf19.7426	C3_06410C_A			0.460385	4.10304	0.000847747	0.00450802		1.37591
orf19.6927	C3_03880C_A	PEP8		0.460283	4.91477	0.000613812	0.00345723		1.37581
orf19.3999	C5_05070W_A			0.458688	2.22751	0.150964	0.276444		1.37429
orf19.5886	C3_04390W_A	CUP5		0.458387	7.6117	6.3388e-06	7.36224e-05		1.374
orf19.5455	C3_00170C_A			0.458249	6.09398	0.000188565	0.00129465		1.37387
orf19.651	CR_05020W_A	LYP1		0.458248	0.912428	0.151645	0.277224		1.37387
orf19.1162	C1_11580W_A			0.457312	4.56904	0.000894868	0.0046851		1.37298
orf19.5095	C1_08180C_A			0.457188	7.02114	1.09612e-06	1.69868e-05		1.37286
orf19.759	C1_04830W_A	SEC21		0.456896	7.03631	1.2377e-05	0.000129851		1.37259
orf19.5952	C3_04840C_A			0.456544	3.09654	0.0173615	0.051941		1.37225
orf19.2480.1	C1_05700W_A	AUT7		0.456519	1.69139	0.0913982	0.191038		1.37223
orf19.5980	C3_05090C_A			0.455099	1.25235	0.12216	0.237234		1.37088
orf19.5007	C1_13700W_A	ACT1		0.454991	10.292	2.13704e-07	4.24591e-06		1.37077
orf19.2786	C1_07590C_A			0.45461	3.63686	0.00261434	0.0113442		1.37041
orf19.92	C6_00910C_A			0.454559	6.85006	3.0315e-06	3.96213e-05		1.37036
orf19.1345	C7_03300C_A	LIP8		0.454489	2.38276	0.0806758	0.173164		1.3703
orf19.3181.1	C5_01900C_A			0.454244	0.306963	0.28673	0.435393		1.37006
orf19.5197	C1_04400C_A	APE2		0.453952	6.97071	7.3352e-06	8.28878e-05		1.36979
orf19.7409	C3_06250W_A	ERV25		0.453747	6.68729	1.76042e-06	2.53949e-05		1.36959
orf19.2068	C2_00590W_A			0.453469	4.51255	0.00623581	0.0230938		1.36933
orf19.7083	C7_00370W_A	DCC1		0.453334	2.26181	0.0414163	0.102717		1.3692
orf19.1782	C2_10010C_A			0.453154	6.17434	3.94036e-06	4.89073e-05		1.36903
orf19.6528	C7_01930C_A			0.453061	3.90155	0.0010161	0.00519444		1.36894
orf19.3122.2	C4_06880C_A			0.452852	4.39551	0.0456988	0.111352		1.36874
orf19.2837	CR_02790C_A	ALG5		0.452328	2.89341	0.0416228	0.103182		1.36825
orf19.856	C2_03620W_A	IFK2		0.451906	2.61645	0.0131567	0.0418071		1.36785
orf19.6810	C3_06910C_A	TPD3		0.451619	4.94174	0.000990487	0.00509808		1.36757
orf19.5345	C2_10670W_A			0.450219	6.52706	0.00139647	0.00679321		1.36625
orf19.5495	C2_06320W_A			0.45013	6.3348	3.41004e-06	4.35201e-05		1.36616
orf19.362	C4_00010W_A	TLO9		0.449809	4.00487	0.00116744	0.0058577		1.36586
orf19.5210.1	C2_05870W_A			0.449036	2.22787	0.126403	0.243756		1.36513
orf19.1510	C2_01980C_A	SRD1		0.448212	3.97741	0.00175302	0.0081477		1.36435
orf19.6132	CR_07370W_A			0.448041	3.9829	0.0758304	0.165315		1.36419
orf19.6582	C7_01470C_A	PRE10		0.447913	5.15533	0.000305876	0.0019314		1.36407
orf19.316	C3_03170W_A	SEC13		0.447289	6.36753	0.000327394	0.00204113		1.36348
orf19.2661	C1_06180W_A	TLO34		0.447214	2.5026	0.103187	0.208813		1.3634
orf19.2686	C4_03050C_A			0.446813	4.13031	0.000647398	0.00361636		1.36303
orf19.7128	C7_04330C_A	SYS1		0.446339	3.56222	0.00630088	0.0232489		1.36258
orf19.1332	C7_03440W_A	SNG4		0.446206	3.39059	0.00918085	0.0313583		1.36245
orf19.5561	C6_02860W_A	STE23		0.445969	3.86589	0.0171986	0.0515387		1.36223
orf19.4699	C4_00950C_A			0.445125	2.6107	0.0208369	0.0599255		1.36143
orf19.3651	C6_00750C_A	PGK1		0.444844	7.12044	0.00169891	0.00794385		1.36117
orf19.7131	C7_04310C_A			0.444555	5.92388	0.0030173	0.0127858		1.36089
orf19.3607	C2_08690C_A			0.444388	0.734063	0.177754	0.310287		1.36074
orf19.4181	C4_00620C_A	SPC2		0.444169	3.07307	0.0204019	0.0588541		1.36053
orf19.1158	C1_11620W_A			0.444096	0.497601	0.253144	0.400074		1.36046
orf19.1137	C1_11790W_A			0.443971	2.43011	0.0464433	0.112528		1.36034
orf19.1372	C2_09780C_A			0.443762	5.97573	1.27781e-05	0.000133285		1.36015
orf19.6414.3	CR_08460W_A	TPM2		0.443583	7.77214	9.439e-07	1.49247e-05		1.35998
orf19.314	C3_03150W_A			0.443582	4.53286	0.000127759	0.000931402		1.35998
orf19.6243	C1_06680W_A	VPS34		0.443177	3.29744	0.0110974	0.0366133		1.3596
orf19.1868	C2_07570W_A	RNR22		0.442731	1.20789	0.125455	0.242505		1.35917
orf19.4686	C4_01020C_A			0.442661	5.47538	0.000128247	0.000933706		1.35911
orf19.3319				0.442502	5.18757	0.000122104	0.000897412		1.35896
orf19.3448	C6_01360W_A			0.442457	0.761251	0.20534	0.343965		1.35892
orf19.5041	C4_03860C_A			0.442171	2.40914	0.0376571	0.0952668		1.35865
orf19.5837	C2_02700C_A			0.442019	3.3501	0.00703156	0.0253433		1.3585
orf19.364	C4_00020W_A			0.441743	7.77684	0.000723865	0.0039659		1.35824
orf19.6046				0.441637	4.75952	0.000148322	0.00105577		1.35814
orf19.27	C2_06510W_A			0.441621	2.81604	0.0283996	0.0767128		1.35813
orf19.3131	C4_06780C_A	OYE32		0.441422	4.62734	0.000553379	0.00318295		1.35794
orf19.2919	C4_06190C_A	MPH1		0.441378	3.81512	0.00446974	0.0176063		1.3579
orf19.1367.1	C2_09830C_A			0.440951	1.67763	0.145479	0.269349		1.3575
orf19.413	C1_05520W_A			0.440927	2.2554	0.0608632	0.139586		1.35748
orf19.412	C1_05530C_A	SSH1		0.440535	5.39931	0.00410126	0.0165024		1.35711
orf19.2114	C2_00180C_A			0.440191	1.3811	0.125763	0.24284		1.35678
orf19.326	C3_03270W_A			0.439714	2.67106	0.0188645	0.0556698		1.35634
orf19.2007	C2_01170C_A			0.439667	5.1919	2.76057e-05	0.000253356		1.35629
orf19.4136	C5_01460W_A	YBL053		0.439342	4.97322	0.000150585	0.00106768		1.35599
orf19.1336	C7_03390C_A	PUP3		0.439072	4.78942	0.000753869	0.00408768		1.35573
orf19.4131	C5_01410C_A			0.438622	4.61234	0.0344379	0.0892029		1.35531
orf19.4548				0.437905	1.85237	0.0899601	0.18876		1.35464
orf19.3483	C6_02420W_A			0.437819	0.668367	0.238331	0.383366		1.35456
orf19.2202	C2_07790C_A			0.437818	0.163104	0.304812	0.456208		1.35455
orf19.175	CR_02500W_A			0.437546	2.4561	0.0249456	0.0691035		1.3543
orf19.4579	C4_02120W_A	ERV29		0.436896	4.99602	0.00275646	0.011819		1.35369
orf19.4059	C1_05120W_A			0.436767	3.23269	0.00620541	0.0230063		1.35357
orf19.1544	C2_02260W_A			0.436727	6.23132	1.35553e-05	0.000139514		1.35353
orf19.3980	C5_04920C_A			0.436546	6.51455	6.96616e-05	0.000555654		1.35336
orf19.5258	C1_12070C_A			0.436493	1.33649	0.184764	0.317943		1.35331
orf19.1461	C2_01540W_A			0.436099	0.288007	0.296533	0.446844		1.35294
orf19.5225	C1_12400C_A			0.435477	3.50659	0.0449806	0.110182		1.35236
orf19.3029				0.435273	1.9505	0.0764784	0.16626		1.35217
orf19.728	CR_07580C_A	TSC11		0.43496	3.19879	0.0159655	0.0486772		1.35187
orf19.4736	C1_08780W_A			0.43486	6.29212	8.43104e-06	9.36312e-05		1.35178
orf19.134	C6_01260W_A			0.434585	2.7074	0.0224918	0.0636387		1.35152
orf19.4482				0.433816	1.04027	0.233288	0.377717		1.3508
orf19.1734	CR_04720C_A			0.433683	5.92228	0.000291552	0.00185608		1.35068
orf19.6353	C1_12700W_A			0.433591	1.19956	0.121566	0.236419		1.35059
orf19.3940	C5_04540C_A			0.432742	0.722511	0.19653	0.33291		1.3498
orf19.1743	C2_10350C_A	ACS1		0.43249	5.0669	5.29384e-05	0.000443114		1.34956
orf19.5274	C1_11930W_A			0.432425	6.08504	0.00015257	0.00107753		1.3495
orf19.3259	CR_00990W_A			0.432415	1.90227	0.104242	0.210411		1.34949
orf19.7279.1	CR_08830W_A			0.432243	1.48864	0.123804	0.240084		1.34933
orf19.246	C3_02570W_A			0.432016	2.1235	0.0763483	0.166129		1.34912
orf19.6986	C3_05510W_A			0.431788	1.66449	0.092293	0.192537		1.3489
orf19.7479	CR_00560W_A	NTH1		0.43163	4.36836	0.00047251	0.00279183		1.34876
orf19.4339	C5_03090W_A	VPS4		0.431496	5.05691	0.000559722	0.00321263		1.34863
orf19.3292				0.430781	3.90827	0.00680406	0.0246858		1.34796
orf19.7634	CR_10540C_A	MCD1		0.430225	5.06627	0.000157356	0.001107		1.34744
orf19.4991	C1_13570W_A	MPT5		0.43015	4.8248	0.000320205	0.00200785		1.34737
orf19.6757	C3_07340W_A	GCY1		0.430052	1.91672	0.0743739	0.163189		1.34728
orf19.5586	C6_03040C_A			0.429205	2.93559	0.0118878	0.0386103		1.34649
orf19.4090.1	C2_09290W_A			0.429002	2.95538	0.0747277	0.163772		1.3463
orf19.4174	C4_00680W_A			0.428951	4.38164	0.00131892	0.00649194		1.34625
orf19.348	C3_03500W_A	SKN2		0.428908	3.52549	0.0146403	0.0454545		1.34621
orf19.5901	C3_04470W_A	PKC1		0.428622	7.13385	4.28196e-06	5.27849e-05		1.34595
orf19.4807	C1_09440W_A			0.42833	3.15948	0.00941191	0.0319463		1.34567
orf19.3994	C5_05020C_A			0.42814	4.68312	0.000402643	0.00244124		1.3455
orf19.6065				0.428121	4.96825	0.0005501	0.00316745		1.34548
orf19.6758	C3_07330W_A			0.42782	2.40805	0.0647238	0.146398		1.3452
orf19.6557	C7_01670W_A			0.427759	1.422	0.175842	0.308462		1.34514
orf19.317	C3_03180C_A	PNP1		0.427736	4.35723	0.0131932	0.0418723		1.34512
orf19.4756	C1_09000W_A			0.427255	1.37351	0.138464	0.260512		1.34467
orf19.1507	C2_01950C_A	AMN1		0.42701	1.0315	0.179722	0.31274		1.34444
orf19.4013	C5_05200C_A			0.426932	2.87836	0.106033	0.213642		1.34437
orf19.7500	CR_00330C_A	PXA1		0.4269	3.37279	0.0436455	0.107508		1.34434
orf19.5021	C1_13830C_A	PDX1		0.426522	6.28842	2.02817e-05	0.000197944		1.34399
orf19.3362	C4_03350C_A	AIF1		0.426465	3.21338	0.0196885	0.0574761		1.34394
orf19.4134	C5_01440C_A			0.425903	2.19794	0.0497367	0.118685		1.34341
orf19.7589	CR_10130W_A			0.425874	4.25142	0.0449117	0.110077		1.34339
orf19.727	CR_06380C_A			0.425208	2.16461	0.0516749	0.122421		1.34277
orf19.1816	CR_07070C_A	ALS3		0.42491	5.93772	0.000165319	0.00115702		1.34249
orf19.2124	C6_04410C_A			0.424818	4.19286	0.00137397	0.00670179		1.3424
orf19.7453	C3_06640W_A			0.42406	3.15579	0.00960443	0.032397		1.3417
orf19.1265	C4_05790W_A			0.423572	4.81205	0.000594896	0.00337876		1.34124
orf19.3784	C4_04940W_A			0.423534	0.198632	0.401092	0.552583		1.34121
orf19.3728	CR_02390W_A			0.421629	5.81248	9.60954e-05	0.000739321		1.33944
orf19.5249	C1_12150C_A			0.42066	0.557125	0.266928	0.413427		1.33854
orf19.2440	C1_06040W_A	RTT101		0.420613	2.76399	0.0473843	0.114228		1.3385
orf19.1711	C3_01400W_A	END3		0.420561	3.71021	0.0255444	0.0704387		1.33845
orf19.5563	C6_02870W_A	RNH1		0.420425	5.71237	1.97171e-05	0.000193392		1.33832
orf19.5114	C1_08340C_A			0.420172	2.31748	0.0636196	0.144503		1.33809
orf19.1010	CR_05290W_A	MNT3		0.419306	2.41737	0.125595	0.242689		1.33728
orf19.2322.3	C1_10940C_A	ERP5		0.418596	7.37114	3.48328e-06	4.42466e-05		1.33663
orf19.262	C3_02700W_A	SMC3		0.418295	2.77331	0.01689	0.0508389		1.33635
orf19.4412	C4_06020C_A			0.418259	3.64863	0.00517722	0.0198076		1.33631
orf19.5636	C4_00130W_A	RBT5		0.418013	8.95051	0.000105043	0.000795746		1.33609
orf19.1797	C4_05400C_A			0.415478	2.71246	0.0950969	0.196952		1.33374
orf19.5999	C3_05210C_A	DYN1		0.415245	5.51684	0.00125059	0.00622311		1.33353
orf19.1964	C5_01070C_A			0.415229	5.72884	0.00248931	0.0108625		1.33351
orf19.730	CR_07190W_A			0.413884	5.27027	0.000229461	0.00151043		1.33227
orf19.5711	C6_03470W_A			0.413754	4.98383	0.00019815	0.00135021		1.33215
orf19.3458	C6_02180W_A			0.41364	3.4363	0.00769879	0.0273108		1.33204
orf19.3844	C4_04430W_A	MRP8		0.412933	3.81185	0.00445029	0.017561		1.33139
orf19.2209	C2_07730W_A	YVC1		0.412333	5.26014	0.000111873	0.000838123		1.33084
orf19.395	C1_08500C_A	ENO1		0.412251	7.94122	0.00990803	0.0333175		1.33076
orf19.3060				0.412219	5.07332	0.000206825	0.0013953		1.33073
orf19.4637	C4_01470W_A			0.412064	2.28938	0.0512087	0.12145		1.33059
orf19.2483	C1_05680C_A	RIM1		0.412055	4.80408	0.00151902	0.00724003		1.33058
orf19.7156	C7_04180W_A	FAA2-3		0.411497	3.29545	0.0161111	0.0490385		1.33007
orf19.5307	C4_04030W_A	JEN2		0.411191	3.35537	0.0226999	0.0640939		1.32978
orf19.1840	C1_10680C_A			0.411186	7.10169	1.76936e-05	0.000176092		1.32978
orf19.1754	C2_10260C_A	CMK2		0.410948	2.91585	0.0214954	0.0613472		1.32956
orf19.4236	C5_02300C_A	RET2		0.410565	6.83631	7.01942e-06	8.01544e-05		1.32921
orf19.1576	C2_02520W_A			0.409599	3.01188	0.0246513	0.068509		1.32832
orf19.3647	C6_00780W_A	SEC8		0.409468	5.11245	0.00174084	0.00810498		1.3282
orf19.4858	C1_09920W_A	VPS41		0.40933	3.97817	0.00372958	0.0151932		1.32807
orf19.3546	C2_05150W_A	PEX2		0.408754	2.70081	0.0295754	0.0791401		1.32754
orf19.1326	C4_03530W_A			0.408417	4.31551	0.00277808	0.0119023		1.32723
orf19.3780	C4_05000W_A			0.408388	1.56554	0.119055	0.232536		1.3272
orf19.4119	C2_06010W_A	SPO72		0.408353	4.19108	0.0017111	0.00799398		1.32717
orf19.4301	C5_02780W_A			0.408208	3.93694	0.00666169	0.0243939		1.32704
orf19.5030	C1_13920W_A	DOS2		0.408094	4.10678	0.00393502	0.0159399		1.32693
orf19.7052	C7_00670C_A			0.407508	5.43963	0.000213094	0.00143197		1.32639
orf19.6739	C3_07490W_A			0.40729	5.05963	0.000205781	0.00138998		1.32619
orf19.1392	C2_09620W_A			0.406207	5.11903	0.000367096	0.00224164		1.3252
orf19.5013	C1_13760W_A	AGM1		0.406084	3.91719	0.00590025	0.0221015		1.32508
orf19.1670	C3_01750C_A	BRO1		0.405909	4.15574	0.00198746	0.00899389		1.32492
orf19.4753	C1_08950W_A	PFK26		0.40517	5.39764	0.000160516	0.00112631		1.32424
orf19.4068	C2_09100C_A			0.404855	4.90095	0.000721331	0.00396002		1.32396
orf19.23	C2_06460W_A	RTA3		0.404805	5.46432	0.000195613	0.00133628		1.32391
orf19.7642	CR_10590W_A			0.403245	5.18814	0.00204901	0.00922692		1.32248
orf19.2290	C2_07330W_A	TOR1		0.402702	6.76578	4.27452e-05	0.000367984		1.32198
orf19.1704	C3_01460C_A	FOX3		0.402641	3.4043	0.00751181	0.0268229		1.32193
orf19.302	C3_03060W_A			0.402398	1.47046	0.14028	0.262554		1.3217
orf19.6114				0.402013	4.52734	0.0181425	0.0539501		1.32135
orf19.1051				0.401953	6.65374	4.79098e-05	0.000404141		1.3213
orf19.4032	C5_05380W_A	RPN5		0.401694	5.59882	8.03591e-05	0.000631692		1.32106
orf19.2886	C4_06480C_A	CEK1		0.40146	3.01839	0.0448247	0.109963		1.32084
orf19.3311				0.401382	1.88347	0.0855251	0.181632		1.32077
orf19.1747	C2_10310C_A	KIP2		0.401242	1.87498	0.144625	0.268277		1.32064
orf19.1683	C3_01600W_A	PPH21		0.40089	6.53672	4.47079e-05	0.000380684		1.32032
orf19.779				0.400335	4.18547	0.00351134	0.0145164		1.31981
orf19.5343	C2_10660W_A	ASH1		0.400286	3.97077	0.0141481	0.0441791		1.31977
orf19.6176	C3_07810C_A	SEC61		0.399857	8.56738	8.99659e-05	0.000700108		1.31938
orf19.3433	C6_01510W_A	OYE23		0.398514	1.8874	0.0966303	0.199362		1.31815
orf19.6741	C3_07470W_A			0.398166	1.77477	0.143175	0.266435		1.31783
orf19.2233	C2_06820C_A	PRE2		0.397861	5.78536	0.00319549	0.0134048		1.31755
orf19.752				0.397755	4.43226	0.00430434	0.0171164		1.31746
orf19.2216	C2_07660W_A	PDS5		0.397218	4.93052	0.000290181	0.00185009		1.31697
orf19.2691	C4_03000C_A			0.39717	1.7528	0.0956527	0.197872		1.31692
orf19.1543	C2_02250C_A	OPI1		0.39713	4.11576	0.00221775	0.0098599		1.31689
orf19.3151	C2_06710W_A			0.39701	1.68721	0.109285	0.218732		1.31678
orf19.6489	C7_02240W_A	FMP45		0.396999	0.27244	0.325798	0.478637		1.31677
orf19.4170	C4_00720W_A	CSP2		0.396667	0.353963	0.381042	0.533499		1.31646
orf19.223	C2_08860W_A			0.396489	5.52276	0.000364687	0.0022351		1.3163
orf19.3123.2	C4_06860C_A			0.395594	2.33804	0.0729612	0.160871		1.31548
orf19.4819	C1_09550W_A			0.395361	1.90223	0.12688	0.244301		1.31527
orf19.1310	C4_03680C_A			0.395229	2.92571	0.0392446	0.0984108		1.31515
orf19.6344	C1_12780W_A	RBK1		0.394361	4.00489	0.00279753	0.0119667		1.31436
orf19.360	C3_03610W_A	FUR4		0.394217	3.68497	0.0352031	0.0906225		1.31423
orf19.1720	C3_01310W_A			0.393942	3.01772	0.0274481	0.0745512		1.31398
orf19.1299	C4_03790W_A	RPN6		0.393306	4.35543	0.00215574	0.00963951		1.3134
orf19.2163	C6_04650W_A			0.393099	7.34236	0.000122821	0.000900247		1.31321
orf19.2426	CR_03020C_A			0.393059	3.35582	0.0106753	0.0354798		1.31317
orf19.6191	C3_07970C_A	TLO8		0.39295	3.16551	0.0445238	0.109324		1.31308
orf19.1080	C6_04230W_A			0.392258	0.709782	0.283137	0.430901		1.31245
orf19.3365	C4_03380C_A	DAO2		0.392205	4.99398	0.000371172	0.00226206		1.3124
orf19.5250	C1_12140W_A			0.391854	2.03472	0.0904324	0.189531		1.31208
orf19.7425	C3_06400C_A			0.391282	3.63272	0.00880715	0.0302917		1.31156
orf19.1059				0.390986	6.39725	0.000145723	0.0010395		1.31129
orf19.398	C1_08530W_A			0.39033	0.668538	0.281165	0.428623		1.31069
orf19.4280	C5_02640W_A			0.390056	1.06194	0.191947	0.327293		1.31044
orf19.3310				0.389847	1.27452	0.237015	0.382042		1.31025
orf19.1232	C1_07700C_A	VRG4		0.389681	5.48003	0.014442	0.0449418		1.3101
orf19.3183	C5_01890W_A			0.389605	4.16705	0.00423245	0.0169049		1.31003
orf19.1183	C6_00250W_A			0.389575	4.18704	0.00606935	0.02261		1.31001
orf19.516	CR_04280C_A			0.389446	3.95767	0.00588646	0.0220651		1.30989
orf19.337	C3_03400C_A	VTI1		0.389037	3.11056	0.101195	0.206635		1.30952
orf19.130	C6_01190C_A	VPS15		0.388174	2.7625	0.040025	0.100013		1.30874
orf19.5016	C1_13790C_A			0.38805	2.95368	0.0462605	0.112317		1.30862
orf19.1478	C2_01670C_A	STT3		0.387972	6.8022	0.000130574	0.000948105		1.30855
orf19.4066	C2_09070C_A			0.387959	4.11821	0.00918959	0.0313684		1.30854
orf19.4883	C1_10140C_A			0.38654	1.75257	0.145932	0.269964		1.30725
orf19.4616	C4_01770W_A	POL30		0.386491	4.53237	0.0605042	0.138822		1.30721
orf19.5142	C7_03130C_A	DFR1		0.386186	3.06517	0.026413	0.0724654		1.30693
orf19.1634	C3_02120W_A			0.38602	4.20259	0.00270959	0.0116615		1.30678
orf19.3517	CR_05460W_A			0.385871	3.02585	0.0198998	0.0579427		1.30665
orf19.3450.1	C6_01330C_A			0.38543	1.70659	0.171197	0.303117		1.30625
orf19.7321	CR_09230C_A			0.384982	3.95495	0.00536204	0.0204353		1.30584
orf19.1949	C5_01210W_A	VPS1		0.384814	6.74074	0.000321513	0.0020114		1.30569
orf19.2809	C3_04000C_A	CTN3		0.384779	0.64316	0.318936	0.470756		1.30566
orf19.1567	C2_02440W_A			0.383987	4.04375	0.00833929	0.0290323		1.30494
orf19.7372	C3_05920W_A	MRR1		0.383284	4.60163	0.00196662	0.00895629		1.30431
orf19.5417	C3_00480C_A	DOT5		0.38311	3.2532	0.023689	0.0664027		1.30415
orf19.7377	C3_05960W_A	ASE1		0.382225	3.06282	0.049163	0.11742		1.30335
orf19.6113				0.382058	1.25569	0.224882	0.367508		1.3032
orf19.5752	C6_03780C_A			0.381798	2.75261	0.0706729	0.156845		1.30296
orf19.2335	C1_10820C_A			0.381772	3.8951	0.0137911	0.0432889		1.30294
orf19.709	CR_06750C_A	PUP2		0.381707	5.45006	0.000407755	0.00246838		1.30288
orf19.2883	C4_06510C_A	CSO99		0.381704	3.3346	0.0152787	0.047006		1.30288
orf19.6272	C1_06390W_A			0.381472	1.34696	0.172175	0.304095		1.30267
orf19.5219	C1_12450C_A	IRA2		0.380952	6.37678	0.00854818	0.0295886		1.3022
orf19.7244	C1_14320C_A			0.380681	4.41237	0.00601946	0.0224704		1.30196
orf19.5533	C6_02630C_A			0.37962	3.71384	0.0301524	0.0801305		1.301
orf19.499	CR_04150W_A			0.37873	2.71489	0.0353951	0.0909011		1.3002
orf19.6581	C7_01480W_A			0.378469	4.22035	0.00594087	0.0222383		1.29996
orf19.2664	C4_03290W_A			0.378029	5.58285	0.000510662	0.00298473		1.29957
orf19.4993	C1_13580W_A	SEC18		0.377754	4.60694	0.0111951	0.036817		1.29932
orf19.5124	C7_03290C_A	RBR3		0.377546	3.40756	0.0121571	0.0392736		1.29913
orf19.1067				0.377149	2.04712	0.260227	0.406999		1.29877
orf19.994	C1_10510W_A			0.377076	2.31861	0.0712897	0.157998		1.29871
orf19.204	C2_09000C_A			0.376595	1.40178	0.276708	0.423973		1.29827
orf19.6469	C7_02420C_A			0.376572	3.68326	0.0199018	0.0579427		1.29825
orf19.5076	C1_08030W_A	PFY1		0.376275	6.67745	0.00156317	0.0074049		1.29799
orf19.7092	C7_00300W_A			0.376228	4.92638	0.00305728	0.0129249		1.29794
orf19.3285	CR_00700W_A			0.375827	1.59934	0.137833	0.260127		1.29758
orf19.6082				0.375699	8.42636	4.87724e-05	0.000410778		1.29747
orf19.3482	C6_02410W_A			0.375578	4.25925	0.00865204	0.0298718		1.29736
orf19.5615	C6_03270C_A	AYR2		0.375395	0.758845	0.264703	0.411036		1.29719
orf19.2672	C4_03180W_A	NCP1		0.374929	7.2266	0.000360319	0.00221686		1.29678
orf19.7006	C7_01070C_A			0.374897	5.10421	0.00239853	0.0105262		1.29675
orf19.3337				0.374463	1.65329	0.201442	0.338804		1.29636
orf19.4947	C1_13190W_A			0.374448	5.07583	0.0199778	0.0580557		1.29634
orf19.1941	C5_01280C_A	NUF2		0.374071	2.23866	0.148922	0.273908		1.296
orf19.5387	C3_00700W_A	VPS8		0.373849	3.57053	0.0238558	0.0667668		1.29581
orf19.1238	C4_05570C_A	TUB4		0.37365	3.30738	0.0287468	0.0772896		1.29563
orf19.4491	C2_04580W_A	ERG20		0.373594	4.16519	0.00753066	0.0268549		1.29558
orf19.4867	C1_10010C_A	SWE1		0.373402	4.87777	0.00140723	0.00682108		1.2954
orf19.288	C3_02950C_A	MET13		0.373391	4.31647	0.0024119	0.0105672		1.29539
orf19.4969	C1_13420C_A	KEM1		0.373349	6.7484	5.93314e-05	0.000489823		1.29536
orf19.7368	C3_05880C_A			0.373106	7.03021	9.59797e-05	0.000739321		1.29514
orf19.1968.1	C5_01020C_A			0.372639	1.53827	0.296955	0.447039		1.29472
orf19.861	C2_03590C_A	CAP4		0.372376	2.56813	0.0901186	0.188946		1.29448
orf19.4577.3	C4_02140C_A	TIM10		0.372232	6.04832	0.172437	0.30436		1.29435
orf19.2512	C3_01100W_A			0.371995	1.86855	0.11018	0.219656		1.29414
orf19.7324	CR_09290W_A	THI13		0.371323	0.980649	0.269526	0.416973		1.29354
orf19.972	C5_00230C_A			0.370991	1.36833	0.217851	0.359078		1.29324
orf19.668	C1_11350C_A	TOS4		0.370636	5.20629	0.00223638	0.00993459		1.29292
orf19.3706	CR_07780W_A			0.369877	3.33546	0.0326579	0.0855732		1.29224
orf19.7186	C7_03940C_A	CLB4		0.369739	4.91332	0.00131984	0.00649194		1.29212
orf19.6852.1				0.369495	2.34162	0.257507	0.404431		1.2919
orf19.6991	C3_05560W_A	PRE3		0.369465	4.96782	0.0633055	0.144031		1.29187
orf19.2263	C2_07080C_A			0.369445	3.41628	0.316787	0.468445		1.29186
orf19.1451	C2_01470W_A	SRB9		0.368972	6.04283	0.000213975	0.00143197		1.29143
orf19.7556	CR_09840C_A			0.368764	1.82499	0.165882	0.295612		1.29125
orf19.6673	C5_03610W_A	HEX1		0.36847	6.76369	0.000139153	0.00100458		1.29098
orf19.2066.1	C2_00610C_A	ATP18		0.368046	6.19064	0.0288761	0.077575		1.2906
orf19.3696	C7_02680W_A	TOM22		0.368034	4.84924	0.0211211	0.0605283		1.29059
orf19.2036	C2_00880W_A			0.368019	5.56363	0.00255252	0.0111204		1.29058
orf19.5539	C6_02680W_A			0.367902	1.58655	0.240159	0.385164		1.29047
orf19.4595	C4_01970W_A			0.367472	1.96013	0.123525	0.239629		1.29009
orf19.4642	C4_01430C_A			0.367412	2.96489	0.0344908	0.0892547		1.29004
orf19.5671	C4_00420C_A			0.366597	7.03231	6.58998e-05	0.000531335		1.28931
orf19.6789	C3_07110W_A			0.366533	2.77753	0.0925976	0.193024		1.28925
orf19.6692	C7_03600W_A	MNN26		0.366432	5.71043	0.00724628	0.0259774		1.28916
orf19.5214	C2_05940C_A	VPS33		0.365965	3.69185	0.0270571	0.0737408		1.28874
orf19.4367	CR_03680C_A	SMC1		0.365238	4.98327	0.00122158	0.00609553		1.28809
orf19.6023				0.364801	1.83582	0.209217	0.348631		1.2877
orf19.6778	C3_07230W_A			0.364699	5.98703	0.000719171	0.00395216		1.28761
orf19.940	C5_00490C_A	BUD2		0.364642	4.05955	0.0146983	0.0455824		1.28756
orf19.6031				0.364449	4.48209	0.00271112	0.0116615		1.28739
orf19.90	C6_00890W_A			0.364312	3.40902	0.0210242	0.060368		1.28727
orf19.1418	C4_04290W_A	SEC15		0.363943	5.17125	0.00092606	0.00481587		1.28694
orf19.5792	C2_03070C_A	SMP3		0.363631	4.35123	0.00495469	0.0190733		1.28666
orf19.4269	C5_02560C_A			0.363588	1.50237	0.210975	0.350913		1.28662
orf19.4312	C5_02900W_A			0.363056	5.76487	0.000285238	0.00182444		1.28615
orf19.1036				0.362717	5.35745	0.00105972	0.00539713		1.28585
orf19.7264	C1_14460W_A			0.362683	7.55748	0.00537572	0.0204552		1.28582
orf19.841	C2_03800C_A			0.361657	5.11871	0.00107391	0.00545402		1.2849
orf19.7308	CR_09120C_A	TUB1		0.361411	7.6843	0.000352387	0.00217446		1.28468
orf19.7027	C7_00880C_A			0.361231	2.93953	0.0328631	0.0859447		1.28452
orf19.479.2	CR_03970C_A	SEC22		0.36094	2.24736	0.13677	0.258435		1.28426
orf19.4153	C5_01590W_A			0.360393	2.37316	0.126512	0.243766		1.28378
orf19.200	C2_09040W_A			0.360185	5.81531	0.000305369	0.00193045		1.28359
orf19.2021	C2_01010W_A	HGT8		0.360029	7.5097	0.000131503	0.000952297		1.28345
orf19.1718	C3_01330W_A	ZCF8		0.359744	3.43719	0.0287381	0.0772896		1.2832
orf19.6540	C7_01800C_A	PFK2		0.358748	7.60419	0.0173052	0.051813		1.28231
orf19.5239	C1_12240C_A			0.358235	4.06509	0.00772776	0.0273778		1.28186
orf19.89	C6_00880W_A	PEX7		0.357994	4.12633	0.0225536	0.063747		1.28164
orf19.2369.1	CR_06950C_A	ATX1		0.357977	2.53007	0.0705533	0.156744		1.28163
orf19.3544	C2_05130W_A			0.357865	1.81521	0.159645	0.287966		1.28153
orf19.1420	C4_04280C_A			0.357672	3.69061	0.0253266	0.0699446		1.28136
orf19.733	CR_07160C_A			0.357111	2.87203	0.0767986	0.166756		1.28086
orf19.7389	C3_06080W_A	REV3		0.356764	3.89387	0.0180419	0.0536802		1.28055
orf19.227	C3_02400C_A	COX7		0.356627	3.55687	0.0591522	0.136239		1.28043
orf19.1446	C2_01410C_A	CLB2		0.356414	4.269	0.00515702	0.019754		1.28024
orf19.704	CR_06700C_A	SOL3		0.356066	4.1683	0.0057789	0.0217069		1.27993
orf19.4812	C1_09480W_A	PPT2		0.355924	2.42119	0.157437	0.285033		1.2798
orf19.7527	CR_00110W_A			0.355704	4.86429	0.00240644	0.0105518		1.27961
orf19.3371	C4_03450C_A	JAB1		0.354992	4.56771	0.00190263	0.0087014		1.27898
orf19.2146	C6_04540C_A	HAT2		0.354617	5.50073	0.0213015	0.0608421		1.27865
orf19.5004	C1_13660W_A	RAD54		0.35456	3.29242	0.038368	0.0966147		1.2786
orf19.54				0.35451	5.4845	0.0297332	0.0793082		1.27855
orf19.4543				0.354432	1.93522	0.162429	0.291437		1.27848
orf19.1414	C4_04330C_A			0.353878	5.99601	0.00626146	0.023135		1.27799
orf19.889	C2_03370W_A	THI20		0.353815	3.83031	0.0116958	0.0381697		1.27794
orf19.3856	CR_06050W_A	CDC28		0.353461	4.21501	0.0112449	0.0369426		1.27762
orf19.3241	CR_01130W_A			0.352751	5.60674	0.0010897	0.00552385		1.27699
orf19.5449	C3_00210C_A			0.352676	1.33098	0.207151	0.346145		1.27693
orf19.6795	C3_07050W_A			0.352572	0.892843	0.284962	0.433072		1.27683
orf19.4922	C1_12920C_A			0.351898	3.93541	0.0111556	0.0367159		1.27624
orf19.3732	CR_02370W_A	ERG25		0.351628	5.68523	0.0069952	0.0252463		1.276
orf19.2996				0.351516	5.38503	0.00134603	0.00660117		1.2759
orf19.6247.1	C1_06640C_A			0.351018	2.72748	0.278969	0.426113		1.27546
orf19.5278	C1_11890W_A			0.350736	1.60534	0.207397	0.346167		1.27521
orf19.6952	C3_03670W_A			0.349845	4.3277	0.00837165	0.0290689		1.27442
orf19.1428	C4_04220W_A	DUO1		0.349683	1.51462	0.162898	0.292085		1.27428
orf19.6832	C3_06710W_A			0.349182	5.29314	0.00189271	0.00867067		1.27384
orf19.3829	C4_04530C_A	PHR1		0.348711	3.4318	0.0382176	0.0964151		1.27342
orf19.5158	C7_03030W_A			0.348639	1.1132	0.292307	0.442499		1.27336
orf19.5201.1				0.348295	6.77183	0.000308853	0.00194793		1.27306
orf19.2615	CR_02150W_A	MDL1		0.34817	4.97699	0.00679716	0.0246858		1.27295
orf19.5171	C7_02890C_A	PMT1		0.348085	7.71751	0.000145605	0.0010395		1.27287
orf19.3679				0.347659	2.43833	0.0968578	0.199693		1.27249
orf19.2201	C2_07800W_A			0.347102	4.07854	0.341802	0.494646		1.272
orf19.6901	C7_01190W_A			0.346743	3.69704	0.0144345	0.0449418		1.27169
orf19.330.1	C3_03320W_A	RUB1		0.346611	4.0864	0.00920375	0.0313969		1.27157
orf19.708	CR_06740W_A			0.346583	3.07717	0.0517535	0.122421		1.27155
orf19.4591	C4_02020W_A	CAT2		0.34593	4.11974	0.00927816	0.031611		1.27097
orf19.588	C5_00850C_A			0.345659	0.910178	0.361698	0.514652		1.27073
orf19.6928	C3_03870C_A	SAP9		0.345543	5.77625	0.000886575	0.00466872		1.27063
orf19.1652	C3_01960C_A	POX1-3		0.345532	4.96868	0.00162303	0.00764177		1.27062
orf19.6354	C1_12690C_A			0.345376	0.544213	0.364039	0.516492		1.27048
orf19.3318				0.345329	2.41252	0.0755025	0.164799		1.27044
orf19.7258	C1_14420W_A	DDI1		0.345025	6.43874	0.0110813	0.0366049		1.27017
orf19.4655	C4_01320C_A	OPT6		0.34484	2.42519	0.0961991	0.198851		1.27001
orf19.5869	C3_04260W_A			0.344765	3.94041	0.0248131	0.0688421		1.26994
orf19.1596	C4_03910W_A	FGR28		0.34391	1.88629	0.150207	0.275711		1.26919
orf19.5917	C3_04580C_A	STP1		0.343504	5.00838	0.00256361	0.0111419		1.26883
orf19.5665	C4_00380W_A			0.342971	5.45386	0.000851432	0.00451876		1.26837
orf19.3863	CR_06100C_A			0.342768	0.922593	0.411723	0.563083		1.26819
orf19.3538	C2_05070W_A	FRE9		0.342108	1.62993	0.309161	0.460684		1.26761
orf19.5339	C2_10600W_A			0.341905	2.66578	0.144286	0.267925		1.26743
orf19.5003	C1_13650C_A			0.34179	3.29686	0.0298663	0.0795651		1.26733
orf19.6217	C1_06930W_A	PGA63		0.340584	8.45886	0.000907151	0.0047367		1.26627
orf19.2889	C4_06450W_A			0.339952	1.33325	0.250168	0.396407		1.26571
orf19.4828	C1_09650W_A			0.339909	1.81182	0.199003	0.336007		1.26568
orf19.4581	C4_02100C_A	GPI14		0.33963	1.12803	0.357379	0.509977		1.26543
orf19.6744	C3_07450C_A			0.339511	3.52817	0.0300339	0.0799331		1.26533
orf19.99	C6_00970C_A	HAL21		0.339474	5.6035	0.00839703	0.0291026		1.2653
orf19.2951				0.339419	7.032	0.000227894	0.00150194		1.26525
orf19.2743	C4_02570C_A			0.338277	3.09851	0.098283	0.20208		1.26425
orf19.3591	C2_08800C_A	APE3		0.337473	4.64337	0.00433812	0.0172028		1.26354
orf19.5584	C6_03020W_A	PEP3		0.337207	2.88245	0.128314	0.246015		1.26331
orf19.5281	C1_11860W_A			0.337056	8.75153	0.000145844	0.0010395		1.26318
orf19.7539.1	CR_00040C_A			0.33699	4.43786	0.0253222	0.0699446		1.26312
orf19.7379	C3_05980C_A	FAA2		0.336683	2.94948	0.0579083	0.134057		1.26285
orf19.5384	C3_00710W_A	CHS8		0.336613	4.21836	0.0113469	0.0371877		1.26279
orf19.3249	CR_01060W_A	LAG1		0.336582	4.50847	0.00438898	0.0173512		1.26276
orf19.564	C2_09370C_A	KAR3		0.336552	3.89986	0.0137478	0.0432028		1.26273
orf19.1464	C2_01560W_A	BMT5		0.336535	4.66917	0.00420303	0.0168245		1.26272
orf19.6076				0.336085	3.97074	0.0131427	0.0418071		1.26233
orf19.309	C3_03120C_A	DAL5		0.336063	1.29678	0.260171	0.406999		1.26231
orf19.652	CR_05010W_A			0.335975	3.36378	0.0812262	0.174207		1.26223
orf19.4325	C5_03000C_A			0.335693	3.68086	0.0256178	0.0705235		1.26198
orf19.537	CR_04460C_A			0.335387	2.55993	0.0846645	0.180228		1.26172
orf19.6966	C3_05300C_A			0.335364	2.81734	0.0949492	0.196792		1.2617
orf19.3563	C2_05330C_A			0.334748	2.79041	0.0797883	0.1718		1.26116
orf19.7547	CR_09750C_A			0.334636	1.3807	0.250312	0.396407		1.26106
orf19.5935	C3_04750W_A			0.334145	3.56257	0.0203042	0.0586734		1.26063
orf19.6134	CR_07350W_A			0.334135	4.43915	0.0399206	0.0998291		1.26062
orf19.719	CR_06470W_A			0.333833	4.66018	0.00579312	0.0217453		1.26036
orf19.4378	CR_03800C_A	PPH3		0.333488	2.72928	0.0771511	0.167387		1.26006
orf19.5534	C6_02640C_A			0.332778	3.53645	0.0420163	0.104015		1.25944
orf19.5920	C3_04620C_A			0.332765	2.79698	0.448218	0.597939		1.25942
orf19.1551	C2_02330W_A			0.332483	3.17803	0.0729145	0.160871		1.25918
orf19.3135	C4_06740C_A			0.332098	5.1966	0.0217818	0.0618882		1.25884
orf19.6896	C7_01100C_A			0.332077	1.77894	0.194407	0.329935		1.25882
orf19.5621	C6_03330C_A			0.331643	2.48017	0.0885068	0.186083		1.25845
orf19.2785	C1_07600W_A	ATP7		0.331604	4.21519	0.124678	0.241432		1.25841
orf19.4723	C1_08650C_A	FAD1		0.331117	2.95704	0.163095	0.292343		1.25799
orf19.2369	CR_06960W_A			0.330871	2.63888	0.152613	0.278805		1.25777
orf19.6357	C1_12660W_A			0.330782	1.80751	0.173865	0.306084		1.25769
orf19.1808	CR_04950W_A	MED5		0.330381	4.06603	0.0135494	0.0427278		1.25735
orf19.2641	C5_03380W_A	ARP1		0.329933	2.63392	0.102068	0.20744		1.25696
orf19.2867	C4_06650W_A			0.329855	4.81454	0.00466476	0.0182289		1.25689
orf19.6322	C6_00150W_A	ARD		0.329684	9.32284	0.00555598	0.0209806		1.25674
orf19.306				0.329394	2.4759	0.161351	0.290367		1.25649
orf19.5825.1	C2_02800W_A			0.329241	3.96853	0.0297406	0.0793082		1.25635
orf19.4474				0.328878	2.38473	0.187681	0.321434		1.25604
orf19.7176	C7_04040C_A	NPT1		0.328629	5.33584	0.00282146	0.0120501		1.25582
orf19.3954	C5_04680W_A	PSD2		0.328597	4.9857	0.0036956	0.0150827		1.25579
orf19.6814	C3_06870W_A	TDH3		0.327967	7.55165	0.0634278	0.144224		1.25524
orf19.7104	C7_00190W_A			0.327506	4.14104	0.0398851	0.0997863		1.25484
orf19.697	CR_06620W_A			0.3269	2.37332	0.099244	0.203593		1.25432
orf19.6756	C3_07350W_A			0.326659	4.15201	0.0231468	0.0651185		1.25411
orf19.3678				0.326644	4.65772	0.0083021	0.0289586		1.25409
orf19.2064	C2_00640W_A			0.326632	3.0227	0.101276	0.206635		1.25408
orf19.7448	C3_06590W_A	LYS9		0.326539	3.757	0.0906888	0.189848		1.254
orf19.7539	CR_00050W_A	INO2		0.326367	2.89777	0.0983941	0.202155		1.25385
orf19.3142	C4_06670W_A			0.326357	1.93019	0.177089	0.309649		1.25384
orf19.6151	CR_07210W_A	ARC15		0.325905	4.18335	0.0129822	0.0414454		1.25345
orf19.341	C3_03440C_A			0.325057	4.27176	0.0203229	0.0586963		1.25271
orf19.4330	C5_03030W_A			0.324322	4.27385	0.00992702	0.0333372		1.25208
orf19.1933	C5_01350W_A			0.323885	3.31678	0.107802	0.216401		1.2517
orf19.1208	C4_03990C_A			0.323518	0.527863	0.452398	0.60175		1.25138
orf19.216	C2_08910C_A			0.323327	3.17626	0.0483998	0.115801		1.25121
orf19.4861.1	C1_09940W_A			0.323089	0.819411	0.384679	0.537342		1.25101
orf19.5773	C6_03960W_A			0.32307	5.37621	0.00368398	0.0150466		1.25099
orf19.458.1	CR_05960W_A			0.322085	1.66814	0.226046	0.369189		1.25014
orf19.6029				0.321697	4.14852	0.126095	0.243395		1.2498
orf19.1155	C1_11640C_A	DPP2		0.321697	4.77397	0.0082514	0.0288417		1.2498
orf19.3425	C6_01620W_A			0.321422	4.93148	0.00500498	0.0192395		1.24956
orf19.1574	C2_02500W_A			0.321163	4.34436	0.00888219	0.0305304		1.24934
orf19.478	CR_03960C_A			0.321158	2.23654	0.145198	0.269066		1.24933
orf19.2933				0.32097	2.24059	0.163914	0.293326		1.24917
orf19.2179	C2_08050C_A	SIT1		0.320757	4.63232	0.00825622	0.0288417		1.24899
orf19.5601	C6_03150C_A			0.320597	3.39697	0.0396765	0.0993562		1.24885
orf19.1990	C2_01350C_A	SNX4		0.31981	2.72029	0.112745	0.223512		1.24817
orf19.225	C2_08850C_A			0.319475	4.81276	0.00490313	0.0189016		1.24788
orf19.388	C1_08430W_A	CAF16		0.319222	5.0525	0.0122494	0.0395009		1.24766
orf19.3014				0.319135	9.25495	0.000425978	0.00256438		1.24758
orf19.3442	C6_01420C_A			0.318916	4.35584	0.0204715	0.0589921		1.24739
orf19.5136	C7_03200C_A			0.317943	4.09499	0.0621802	0.142007		1.24655
orf19.3813	C4_04670C_A			0.317771	5.02037	0.0106382	0.0353782		1.2464
orf19.767				0.317757	6.02888	0.0174988	0.0522363		1.24639
orf19.4064				0.317436	4.6671	0.00615467	0.022865		1.24611
orf19.6512	C7_02050C_A	EXO70		0.317167	3.54345	0.0556604	0.130074		1.24588
orf19.430				0.316776	2.79487	0.066997	0.15041		1.24554
orf19.2176	C2_08080C_A	IFM3		0.316474	3.27412	0.0824629	0.176581		1.24528
orf19.4107	C2_06110W_A			0.316271	4.72274	0.00647669	0.0238166		1.24511
orf19.4163	C4_00780C_A			0.316017	5.16962	0.00433875	0.0172028		1.24489
orf19.7286	CR_08910C_A	RPN7		0.315938	5.86368	0.00159905	0.0075354		1.24482
orf19.6286	CR_07640C_A			0.315831	3.37177	0.0503778	0.119846		1.24473
orf19.5462	C3_00140W_A			0.314944	3.93478	0.244998	0.390499		1.24396
orf19.4445	C1_07220W_A			0.314718	6.72277	0.0201064	0.058257		1.24377
orf19.2799	C1_07460C_A	GPI8		0.314263	4.56348	0.0422803	0.104573		1.24338
orf19.2642	C5_03370C_A			0.31264	0.846646	0.404702	0.556286		1.24198
orf19.6798	C3_07020W_A	SSN6		0.312483	8.63496	0.000705376	0.00388422		1.24184
orf19.3667				0.311769	1.09651	0.313334	0.464985		1.24123
orf19.1641	C3_02060W_A			0.311424	0.721549	0.379538	0.531804		1.24093
orf19.2241	C2_06870C_A	PST1		0.310942	1.16243	0.3036	0.454896		1.24052
orf19.941	C5_00480C_A	SEC14		0.310819	5.70845	0.108802	0.217925		1.24041
orf19.6925	C3_03900C_A	HTB1		0.310616	7.01751	0.000759492	0.00411126		1.24024
orf19.7473	CR_00600C_A			0.310526	3.8372	0.0589467	0.135938		1.24016
orf19.3788	C4_04910C_A	SPC34		0.30988	2.06928	0.176427	0.309088		1.2396
orf19.2792	C1_07520C_A	IST2		0.309749	4.68889	0.0211083	0.0605283		1.23949
orf19.4459				0.309278	3.172	0.106159	0.213817		1.23909
orf19.6562	C7_01630W_A	RNH35		0.309003	3.22166	0.0541961	0.1272		1.23885
orf19.1850	CR_06830C_A	SIW14		0.308914	3.07031	0.0856244	0.181701		1.23878
orf19.1460	C2_01530C_A			0.308735	6.28187	0.00110502	0.00557488		1.23862
orf19.3221	CR_01330W_A	CPA2		0.308539	2.87317	0.0857038	0.181735		1.23845
orf19.74	C6_04170C_A	SEC5		0.30853	3.4362	0.0343873	0.0891146		1.23845
orf19.1880	C2_07490W_A	HEM15		0.308495	6.70268	0.000986693	0.00508729		1.23842
orf19.1202	C6_00400C_A			0.308396	2.57191	0.144451	0.268047		1.23833
orf19.4017	C5_05240C_A			0.307884	0.940076	0.397674	0.549777		1.23789
orf19.3456	C6_02160W_A			0.307773	0.94964	0.369562	0.522687		1.2378
orf19.1600	C2_09420W_A			0.307679	4.56399	0.0216987	0.0617491		1.23771
orf19.2175				0.307509	4.94758	0.00514834	0.0197347		1.23757
orf19.4496	C2_04540C_A	GDT1		0.307411	4.61289	0.0479798	0.11519		1.23749
orf19.1283	C5_04060C_A	MEC1		0.307244	5.68119	0.00930498	0.0316767		1.23734
orf19.7457	C3_06680C_A			0.307099	1.59157	0.301624	0.45256		1.23722
orf19.4853	C1_09870W_A	HCM1		0.307069	3.31857	0.0765601	0.166338		1.23719
orf19.3007				0.306899	1.62669	0.249639	0.396039		1.23705
orf19.997	C1_10530W_A	SNL1		0.30674	5.13906	0.00393396	0.0159399		1.23691
orf19.6936	C3_03810W_A	RAD53		0.306536	5.09487	0.00635498	0.0234326		1.23673
orf19.3093	C4_07120C_A	MSH2		0.30496	4.4601	0.0336489	0.0874516		1.23538
orf19.6601.1	CR_09600C_A	YKE2		0.304944	3.9377	0.0428483	0.105833		1.23537
orf19.3743	CR_02260C_A			0.304444	2.89646	0.0855088	0.181632		1.23494
orf19.1221	C6_04030W_A	ALG2		0.304345	4.02989	0.0571004	0.1328		1.23486
orf19.1998	C2_01260W_A			0.30428	2.90789	0.148716	0.273791		1.2348
orf19.4778	C1_09200W_A	LYS142		0.303642	2.42838	0.156628	0.283941		1.23426
orf19.3922	C5_04360C_A			0.303429	3.67761	0.0369827	0.0939814		1.23407
orf19.6909	C7_01290W_A	MED11		0.30337	1.09044	0.41073	0.562291		1.23402
orf19.1107	C5_03870C_A			0.303156	3.15661	0.0909775	0.190379		1.23384
orf19.7463	CR_00660W_A			0.30233	2.02583	0.18114	0.313998		1.23313
orf19.5378	C3_00770C_A	SCL1		0.301823	5.99528	0.00255587	0.0111233		1.2327
orf19.6045				0.301459	6.73304	0.00205526	0.00923591		1.23239
orf19.1468	C2_01600C_A	CDC55		0.301301	6.2876	0.00266284	0.0115269		1.23225
orf19.6010				0.301033	4.886	0.0174701	0.0521794		1.23203
orf19.5693	C5_00040C_A			0.301024	7.83112	0.0101317	0.0338807		1.23202
orf19.3307				0.301004	4.36998	0.0215123	0.0613474		1.232
orf19.2245	C2_06910W_A	YPT72		0.300995	4.80588	0.00774741	0.0274295		1.23199
orf19.6844				0.300962	4.69434	0.033601	0.0874369		1.23197
orf19.2343	C1_10760W_A	VPS23		0.300853	3.89208	0.0349926	0.0902949		1.23187
orf19.1186	C6_00270W_A			0.300519	5.76965	0.00336504	0.0140292		1.23159
orf19.3265.1	CR_00890C_A			0.300486	1.81058	0.354087	0.506079		1.23156
orf19.3158	C3_01190C_A			0.299606	4.0515	0.0330938	0.0864231		1.23081
orf19.6094				0.299448	6.01274	0.0263195	0.0722455		1.23067
orf19.528	CR_04380C_A	SEC26		0.299255	7.80111	0.00640847	0.0235978		1.23051
orf19.4457				0.299124	6.24362	0.00424588	0.016946		1.2304
orf19.5237	C1_12260W_A	VPH2		0.299086	1.98215	0.293045	0.44316		1.23036
orf19.2534	CR_01500W_A	PIN4		0.299015	5.74439	0.00316316	0.0133028		1.2303
orf19.3083	C4_07200C_A			0.298836	4.89904	0.0256424	0.0705296		1.23015
orf19.5369	C2_10860C_A			0.298776	8.13072	0.0151534	0.0467267		1.2301
orf19.350	C3_03520C_A	PRE9		0.298764	5.59033	0.0076559	0.0272121		1.23009
orf19.4702	C4_00920C_A			0.298728	1.50513	0.262069	0.408749		1.23006
orf19.1667	C3_01790C_A			0.298639	3.99478	0.031565	0.0833538		1.22998
orf19.7108	C7_00150W_A			0.298552	7.31774	0.0151623	0.0467276		1.22991
orf19.3422	C6_01650C_A	FMP27		0.297103	5.75232	0.0249195	0.0690666		1.22867
orf19.5300	C4_04090C_A			0.297068	5.20228	0.00930911	0.0316767		1.22865
orf19.5880	C3_04360W_A			0.297055	4.84595	0.0109846	0.0363518		1.22863
orf19.6816	C3_06860C_A			0.297015	0.340447	0.479252	0.625924		1.2286
orf19.482	CR_04000W_A	RPT4		0.297001	6.81109	0.00162672	0.00765251		1.22859
orf19.147	C2_04660C_A	YAK1		0.29692	3.64603	0.0612602	0.14026		1.22852
orf19.2911	C4_06250C_A	SEC3		0.296044	6.04534	0.00542242	0.0205961		1.22777
orf19.3050				0.29587	4.50704	0.0113907	0.0373086		1.22763
orf19.6479	C7_02320W_A	SEC1		0.295457	5.12293	0.0170857	0.0512854		1.22727
orf19.4031	C5_05360C_A			0.295024	4.66124	0.0197075	0.0575005		1.22691
orf19.835	C2_03900C_A			0.294889	5.94595	0.00220181	0.0098051		1.22679
orf19.5026	C1_13880C_A			0.294866	7.07593	0.0246738	0.0685256		1.22677
orf19.3802	C4_04780W_A	PMT6		0.294794	6.78065	0.00204986	0.00922692		1.22671
orf19.1659	C3_01880W_A	ALG8		0.294339	3.32771	0.0906413	0.189827		1.22632
orf19.3123	C4_06870W_A	RPT5		0.294222	7.37183	0.0131807	0.0418571		1.22622
orf19.6629	CR_05830C_A	ISC1		0.294094	2.97659	0.109507	0.219015		1.22611
orf19.230	C3_02420C_A			0.29359	2.42506	0.161762	0.290815		1.22569
orf19.310	C3_03130C_A			0.293411	2.77812	0.162207	0.291231		1.22553
orf19.6109				0.292543	8.41796	0.0463483	0.11243		1.2248
orf19.5148	C7_03070C_A	CYR1		0.292404	7.39358	0.00190802	0.0087187		1.22468
orf19.3663				0.291426	5.84776	0.00329423	0.013772		1.22385
orf19.7207	C1_14000C_A	DOA4		0.291412	4.28577	0.0231468	0.0651185		1.22384
orf19.3782.2	C4_04970C_A			0.290758	5.10412	0.0195026	0.057087		1.22328
orf19.6780	C3_07210W_A	MET8		0.290462	2.05257	0.176863	0.309453		1.22303
orf19.7381	C3_06000W_A	AHR1		0.290379	4.53409	0.0130209	0.0415199		1.22296
orf19.7202	C7_03800W_A			0.290337	3.05284	0.127987	0.245677		1.22293
orf19.2461				0.290046	4.85365	0.0116854	0.0381587		1.22268
orf19.4082	C2_09220W_A	DDR48		0.289428	2.81578	0.103374	0.209047		1.22216
orf19.1648	C3_02000W_A	RAD50		0.289033	5.46366	0.0115719	0.0378336		1.22182
orf19.335	C3_03380W_A			0.288889	1.39653	0.368002	0.520752		1.2217
orf19.3930	C5_04430C_A	YUH2		0.288608	5.69888	0.00365677	0.0149693		1.22146
orf19.5097	C1_08190C_A	CAT8		0.288495	3.88051	0.0602319	0.138373		1.22137
orf19.2030	C2_00940W_A			0.288093	3.93653	0.0452228	0.110441		1.22103
orf19.3430	C6_01560W_A			0.287923	4.47055	0.0247461	0.0686912		1.22088
orf19.4025	C5_05310W_A	PRE1		0.287399	5.0861	0.00825363	0.0288417		1.22044
orf19.7277	C1_14580C_A			0.287303	4.42116	0.0578632	0.134009		1.22036
orf19.1482	C2_01710W_A	HSK3		0.287247	1.04137	0.442058	0.591505		1.22031
orf19.2107	C2_00260C_A	MUQ1		0.28722	4.01412	0.0476962	0.114827		1.22029
orf19.1255	C4_05700W_A	ZCF5		0.287155	4.39076	0.0389594	0.0978314		1.22023
orf19.4997	C1_13610C_A	KIS2		0.286662	4.24199	0.0246551	0.068509		1.21981
orf19.2881	C4_06540W_A	MNN4		0.286489	6.56819	0.0152534	0.0469549		1.21967
orf19.1433	C2_08390W_A			0.286267	2.53271	0.193685	0.329308		1.21948
orf19.2638.1	C5_03440W_A			0.285997	1.22482	0.472099	0.62035		1.21925
orf19.2896	C4_06390W_A	SOU1		0.285574	2.19702	0.213187	0.353184		1.21889
orf19.663	C1_11400C_A	GIN4		0.285492	7.12786	0.00245891	0.0107557		1.21883
orf19.5011	C1_13740W_A	KAR9		0.285435	3.30676	0.12644	0.243756		1.21878
orf19.7212	C1_14040W_A			0.285024	5.24077	0.00998407	0.0334282		1.21843
orf19.1182	C6_00240C_A			0.284835	2.72664	0.103175	0.208813		1.21827
orf19.4467				0.284773	3.0152	0.182419	0.315284		1.21822
orf19.3684				0.284326	0.217625	0.578675	0.714161		1.21784
orf19.6012				0.284133	4.52297	0.0364615	0.0930568		1.21768
orf19.5147	C7_03080W_A	LMO1		0.283782	6.3089	0.00903411	0.0309155		1.21738
orf19.5139	C7_03160W_A			0.283333	5.37626	0.00804033	0.0283187		1.217
orf19.1160	C1_11600W_A			0.283217	4.36475	0.0223409	0.0632778		1.21691
orf19.2222	C2_08270C_A			0.283065	4.44845	0.030222	0.0802369		1.21678
orf19.3605	C2_08710W_A	PEX17		0.283054	1.30387	0.368277	0.521005		1.21677
orf19.2262	C2_07070W_A			0.2826	2.95255	0.132723	0.252682		1.21639
orf19.4623.3	C4_01700C_A	NHP6A		0.28259	5.60253	0.143278	0.266435		1.21638
orf19.7602	CR_10270C_A	AHA1		0.282137	5.45095	0.00814471	0.0286305		1.21599
orf19.4823	C1_09600C_A	LIP6		0.282083	1.87965	0.244826	0.390455		1.21595
orf19.3184	C5_01880C_A			0.282003	2.13548	0.254244	0.401441		1.21588
orf19.7520	CR_00150C_A	POT1		0.281765	3.9724	0.0565079	0.131601		1.21568
orf19.5352	C2_10720C_A			0.281733	5.24918	0.00835722	0.0290574		1.21565
orf19.30	C2_06540C_A	SPF1		0.281725	7.56249	0.0133076	0.0421613		1.21565
orf19.6255				0.281683	3.42777	0.063797	0.144845		1.21561
orf19.3415	C6_01710C_A	PTK2		0.281329	6.50632	0.0122367	0.0394836		1.21531
orf19.1877	C2_07510W_A			0.281075	2.37444	0.162023	0.291095		1.2151
orf19.4577	C4_02150C_A			0.280938	0.373055	0.530396	0.672623		1.21498
orf19.2752	C4_02500C_A	ADR1		0.280742	4.065	0.035293	0.0906975		1.21482
orf19.4817	C1_09530W_A	RAM2		0.280271	2.6985	0.133192	0.253219		1.21442
orf19.5053	C1_07830C_A			0.28026	1.18852	0.362503	0.515391		1.21441
orf19.4690	C4_00990W_A			0.279796	0.856756	0.478525	0.625126		1.21402
orf19.6786	C3_07140C_A			0.279444	3.14561	0.119955	0.233717		1.21373
orf19.1730	C3_01210C_A			0.279178	5.07618	0.0153927	0.0473031		1.2135
orf19.655	C1_11480W_A	PHO84		0.279171	3.6939	0.0754753	0.164799		1.2135
orf19.4639	C4_01460C_A			0.279124	3.09235	0.0950989	0.196952		1.21346
orf19.6084				0.278882	1.93045	0.276024	0.423533		1.21325
orf19.7215.3	C1_14090W_A			0.278768	8.29865	0.00179787	0.00830636		1.21316
orf19.5015	C1_13780W_A	MYO2		0.2787	7.73085	0.0121253	0.039194		1.2131
orf19.4675	C4_01150W_A	ASK1		0.278664	3.83722	0.0420041	0.104015		1.21307
orf19.837	C2_03870W_A	GNA1		0.278519	3.14346	0.096461	0.199164		1.21295
orf19.6348	C1_12740W_A			0.277885	4.3968	0.0364285	0.0930264		1.21242
orf19.3437	C6_01470W_A			0.277155	1.30731	0.337403	0.490218		1.2118
orf19.6220.3				0.277137	8.27656	0.010365	0.0345753		1.21179
orf19.4295	C5_02750C_A			0.277121	4.3514	0.0225468	0.063747		1.21177
orf19.5689	C5_00080C_A			0.277047	6.96853	0.018863	0.0556698		1.21171
orf19.6016				0.276572	3.7616	0.0827162	0.176914		1.21131
orf19.2519	CR_01360W_A			0.276075	1.67778	0.306981	0.458443		1.2109
orf19.4713	C1_07780W_A			0.275301	5.4777	0.0078216	0.0276121		1.21025
orf19.7438	C3_06500W_A	UBA1		0.27516	7.31269	0.00243451	0.0106576		1.21013
orf19.1331	C7_03450C_A	HSM3		0.27475	0.55915	0.547489	0.687881		1.20978
orf19.2194	C2_07880W_A	APM4		0.274749	3.84135	0.104374	0.210534		1.20978
orf19.7400	C3_06320W_A	ALS7		0.274625	4.83619	0.016291	0.0494197		1.20968
orf19.3631	C2_08470C_A	STN1		0.274405	1.21052	0.441267	0.590971		1.2095
orf19.1116	C5_03780C_A			0.274134	1.44035	0.425892	0.576645		1.20927
orf19.7572	CR_09980W_A	SPT7		0.274028	5.92695	0.00772004	0.0273683		1.20918
orf19.4315	C5_02910C_A	GYP8		0.27363	3.08735	0.163509	0.292794		1.20885
orf19.2574	CR_01770C_A			0.273475	6.39357	0.00673029	0.0245165		1.20872
orf19.4197	C6_00600C_A	YHM2		0.273452	7.03548	0.040685	0.101296		1.2087
orf19.3213	C5_03980W_A			0.273397	5.5992	0.0148611	0.0460083		1.20865
orf19.6124	CR_07440W_A	ACE2		0.272646	3.57305	0.0677362	0.151881		1.20802
orf19.268	C3_02770C_A			0.272422	3.40248	0.0837375	0.178605		1.20783
orf19.5801	C2_03010C_A	RNR21		0.272388	7.55927	0.0287556	0.0772896		1.20781
orf19.554	CR_04630C_A	DIT2		0.272257	1.58124	0.33678	0.489862		1.2077
orf19.5964.2	C3_04960W_A	RPL35		0.272243	8.02802	0.229392	0.373192		1.20768
orf19.1588	C2_02620W_A			0.272094	4.97439	0.0360723	0.0924215		1.20756
orf19.904	C2_03260W_A			0.271987	1.92313	0.273725	0.421665		1.20747
orf19.3366	C4_03390W_A	CSH3		0.271907	6.62214	0.00760644	0.0270895		1.2074
orf19.1140	C1_11760C_A			0.271589	5.42051	0.0121224	0.039194		1.20714
orf19.4909	C1_10380C_A	CBK1		0.271146	6.74459	0.00747101	0.0266948		1.20677
orf19.562	CR_05250C_A	FGR13		0.270968	4.82393	0.0230254	0.0648779		1.20662
orf19.5467	C3_00060W_A	TLO7		0.270898	4.10467	0.110275	0.21974		1.20656
orf19.3128	C4_06810C_A			0.270564	6.13229	0.00483847	0.0187202		1.20628
orf19.5720	C6_03540W_A			0.269861	3.27535	0.118496	0.231611		1.20569
orf19.7049	C7_00700W_A	CYB5		0.269763	6.31228	0.0154204	0.0473615		1.20561
orf19.6771	C3_07270C_A	UBI4		0.269741	9.32108	0.00282536	0.0120573		1.20559
orf19.1485	C2_01740C_A			0.269448	4.05335	0.189	0.322979		1.20535
orf19.7598	CR_10230W_A			0.269022	4.88325	0.0242677	0.0677099		1.20499
orf19.6573	C7_01550W_A	BEM2		0.268855	8.15199	0.00315489	0.0132858		1.20485
orf19.3328				0.268614	5.17877	0.0268151	0.0732481		1.20465
orf19.3359				0.268553	5.51518	0.00898945	0.0308015		1.2046
orf19.1995	C2_01300C_A	MNN24		0.268147	2.84242	0.180565	0.313603		1.20426
orf19.5642	C4_00170W_A			0.268109	7.1799	0.0195627	0.0572011		1.20423
orf19.1492	C2_01830W_A	PRP39		0.267643	3.13472	0.278499	0.425634		1.20384
orf19.3436	C6_01480W_A			0.267625	1.02418	0.422221	0.573419		1.20382
orf19.6073				0.26725	6.03538	0.0130194	0.0415199		1.20351
orf19.945	C5_00440C_A	VPS2		0.267007	4.40255	0.0245513	0.0682903		1.20331
orf19.4738	C1_08800W_A			0.266613	3.79035	0.0519819	0.122908		1.20298
orf19.5248	C1_12160W_A	MSO1		0.266585	3.92824	0.0789527	0.170613		1.20296
orf19.339	C3_03420C_A	NDE1		0.266089	8.09923	0.0035655	0.0146955		1.20254
orf19.3501	C6_02090C_A			0.266087	5.49579	0.0133444	0.0422019		1.20254
orf19.1263	C4_05770C_A	CFL1		0.265483	3.69179	0.0658185	0.148317		1.20204
orf19.4625	C4_01680W_A	TOA2		0.265323	1.95315	0.276098	0.423533		1.20191
orf19.6913	C7_01330C_A	GCN2		0.26527	3.79585	0.182535	0.315284		1.20186
orf19.1204	C6_00430C_A			0.265258	4.91044	0.0268888	0.0733626		1.20185
orf19.1526	C2_02100W_A	SNF2		0.264271	7.32758	0.00338363	0.014085		1.20103
orf19.3762	C1_12540W_A			0.264184	2.11814	0.282883	0.430757		1.20096
orf19.1573	C2_02490C_A			0.26372	6.98112	0.00935507	0.0317932		1.20057
orf19.850	C2_03700W_A			0.263491	2.74849	0.158927	0.287052		1.20038
orf19.4985	C1_13540W_A	GUP1		0.263214	3.10283	0.16879	0.30017		1.20015
orf19.2079	C2_00480C_A	PHHB		0.263049	4.00244	0.0743187	0.163134		1.20001
orf19.974	C5_00220W_A	ROT2		0.262696	5.74156	0.00859544	0.0297143		1.19972
orf19.3664				0.262665	0.43627	0.552598	0.692126		1.19969
orf19.5932	C3_04720C_A			0.262624	4.51043	0.0430053	0.106124		1.19966
orf19.556	CR_05200C_A			0.262348	3.35136	0.29651	0.446844		1.19943
orf19.7339	CR_09420C_A	BGL22		0.262323	2.92766	0.112351	0.223139		1.19941
orf19.511	CR_04230W_A			0.262111	4.49171	0.0318204	0.083824		1.19923
orf19.1389	C2_09650W_A			0.262098	6.9036	0.00426238	0.0169869		1.19922
orf19.1760	C2_10210C_A	RAS1		0.261871	7.24399	0.00466051	0.0182254		1.19903
orf19.3312				0.261734	7.12161	0.00534789	0.0204131		1.19892
orf19.2383	CR_03390C_A	YKU80		0.261502	4.0237	0.0612431	0.14026		1.19873
orf19.4102	C2_06150C_A	RPN10		0.261209	6.19933	0.00924916	0.031532		1.19848
orf19.795	C2_04250W_A	VPS36		0.260556	3.75919	0.132927	0.252891		1.19794
orf19.1654	C3_01940C_A			0.26053	3.96572	0.0739303	0.162611		1.19792
orf19.2532	CR_01480W_A	PRS		0.259567	4.93204	0.0164073	0.0497169		1.19712
orf19.3859	CR_06070W_A			0.259564	5.18781	0.016971	0.0510258		1.19712
orf19.7344	CR_09490W_A			0.259526	3.09379	0.157823	0.285439		1.19708
orf19.4683	C4_01060W_A	MLP1		0.259252	7.21279	0.00639055	0.0235478		1.19686
orf19.6981	C3_05430W_A			0.258919	3.0436	0.197766	0.334473		1.19658
orf19.6443	CR_08670C_A			0.258545	1.37446	0.389109	0.541717		1.19627
orf19.7357	C3_05760W_A			0.258429	3.73012	0.13851	0.260512		1.19618
orf19.1058				0.258143	4.67573	0.0420889	0.104147		1.19594
orf19.6871	C2_05580W_A			0.257227	6.42383	0.00941832	0.0319481		1.19518
orf19.3216	C5_03950W_A			0.257193	4.26218	0.0530402	0.125083		1.19515
orf19.4731	C1_08730W_A			0.257097	5.07727	0.0153585	0.0472249		1.19507
orf19.5841	C2_02660W_A			0.256874	2.6148	0.224803	0.36749		1.19489
orf19.5426	C3_00400C_A			0.25644	2.78991	0.184956	0.318174		1.19453
orf19.3223	CR_01310W_A	ATP3		0.256421	8.96425	0.0297267	0.0793082		1.19451
orf19.6376	CR_08160W_A	PTC5		0.256389	6.99262	0.0125039	0.0402021		1.19448
orf19.7443	C3_06540C_A			0.256386	0.968393	0.48364	0.630289		1.19448
orf19.4405	C4_05940W_A	PPS1		0.256312	1.29882	0.36989	0.522878		1.19442
orf19.7585	CR_10100C_A	INO1		0.256139	11.6963	0.0324105	0.0850892		1.19428
orf19.988	C1_10460W_A			0.255701	3.30998	0.153226	0.279785		1.19392
orf19.1792	C4_05340W_A			0.254911	2.69812	0.214778	0.355386		1.19326
orf19.5322	C2_10470C_A			0.254451	5.53518	0.013809	0.0433052		1.19288
orf19.5113	C1_08330C_A	ADH2		0.25441	2.12526	0.267269	0.413717		1.19285
orf19.1525	C2_02090W_A			0.254321	3.97768	0.0661695	0.149041		1.19277
orf19.5287	CR_05360C_A			0.25429	3.02393	0.139999	0.262386		1.19275
orf19.2926				0.25327	3.30545	0.103189	0.208813		1.19191
orf19.4441				0.252792	4.12376	0.0729965	0.160883		1.19151
orf19.3901	C5_04180W_A			0.25245	1.79317	0.343612	0.496604		1.19123
orf19.956	C5_00330C_A			0.252393	5.67277	0.0226606	0.0640161		1.19118
orf19.753				0.252121	4.56943	0.0316159	0.0834474		1.19096
orf19.3881	CR_06290C_A			0.252081	3.38249	0.176652	0.309183		1.19092
orf19.5782	C2_03140C_A			0.252014	4.165	0.0629585	0.143603		1.19087
orf19.5227	C1_12370W_A			0.251982	2.953	0.270429	0.418132		1.19084
orf19.6411	CR_08430W_A			0.251947	5.58655	0.0126204	0.0404568		1.19081
orf19.6642	CR_05700C_A			0.251815	3.88293	0.0898694	0.188642		1.1907
orf19.5140	C7_03150W_A			0.251653	0.573274	0.570961	0.708404		1.19057
orf19.6403	CR_08350W_A			0.251583	5.34977	0.0257022	0.0706582		1.19051
orf19.5504	C7_03730C_A			0.251034	3.5421	0.101361	0.206655		1.19006
orf19.5968	C3_05000W_A	RDI1		0.251004	5.72654	0.0132684	0.0420619		1.19003
orf19.1991	C2_01340W_A			0.25087	6.17025	0.0589957	0.135957		1.18992
orf19.2549	CR_01610C_A	SHP1		0.250836	6.22683	0.0149921	0.0463873		1.1899
orf19.1323	C4_03560W_A			0.250758	5.44186	0.0232669	0.0654224		1.18983
orf19.5271	C1_11940C_A			0.250744	2.00245	0.293562	0.443779		1.18982
orf19.3054				0.250381	6.93689	0.0100382	0.0335886		1.18952
orf19.6942	C3_03750C_A	ORC3		0.250164	5.18676	0.0337926	0.087783		1.18934
orf19.5260	C1_12050W_A	RPN2		0.250046	8.02837	0.0095156	0.0322176		1.18925
orf19.2866	C4_06660W_A			0.249573	4.20164	0.409845	0.561505		1.18885
orf19.3286	CR_00690C_A			0.248911	3.12795	0.248023	0.394394		1.18831
orf19.7231	C1_14220C_A	FTR2		0.248799	9.84632	0.00477747	0.018549		1.18822
orf19.7205	C1_13980C_A	DUR7		0.248798	3.64035	0.0780346	0.169033		1.18822
orf19.3038				0.248643	6.67447	0.0436081	0.107465		1.18809
orf19.5489	C2_06270W_A			0.248544	1.49397	0.414493	0.566014		1.18801
orf19.5973	C3_05030W_A	PHB2		0.248258	5.6995	0.0155288	0.0476673		1.18777
orf19.347	C3_03490W_A	RSN1		0.248255	1.96383	0.314447	0.465364		1.18777
orf19.7020	C7_00940W_A			0.248149	6.36557	0.0137249	0.043181		1.18768
orf19.7198	C7_03840W_A			0.248025	4.76506	0.036416	0.0930264		1.18758
orf19.4528				0.247948	3.64933	0.102712	0.208187		1.18752
orf19.6214				0.247823	3.89817	0.0740095	0.162653		1.18741
orf19.4737	C1_08790W_A	TPO3		0.24768	4.9194	0.0336271	0.0874369		1.1873
orf19.3515	CR_05440W_A			0.24732	3.21394	0.172737	0.304592		1.187
orf19.4830	C1_09670C_A			0.246685	2.78264	0.245298	0.390825		1.18648
orf19.2757	C4_02450W_A			0.246235	2.62431	0.323761	0.476549		1.18611
orf19.6947	C3_03720W_A	GTT11		0.246139	5.38793	0.0191137	0.0561607		1.18603
orf19.1377	C2_09730C_A	IPK2		0.245898	3.00687	0.20113	0.338804		1.18583
orf19.4618	C4_01750C_A	FBA1		0.24574	9.04884	0.0642602	0.145592		1.1857
orf19.819	C2_04030C_A	ACP12		0.245699	6.23771	0.305227	0.456351		1.18567
orf19.2439				0.245449	3.82748	0.194174	0.329847		1.18546
orf19.3557	C2_05280C_A	GPI19		0.245124	1.53754	0.415245	0.566614		1.18519
orf19.3874	CR_06230W_A			0.244593	4.38437	0.13211	0.251742		1.18476
orf19.610	CR_07890W_A	EFG1		0.244589	4.67981	0.0646631	0.146383		1.18476
orf19.2630	C4_05270C_A	RAD59		0.244017	2.75565	0.478458	0.625126		1.18429
orf19.2587	CR_01900C_A	HNM3		0.243768	1.78279	0.333463	0.487128		1.18408
orf19.3659	C6_00700C_A			0.24362	2.74512	0.346035	0.498908		1.18396
orf19.7678	CR_10850C_A	ATP16		0.243482	10.2645	0.0582639	0.134643		1.18385
orf19.4341	C5_03120W_A			0.243125	3.6714	0.0998448	0.20467		1.18355
orf19.2306	C1_11100W_A			0.243112	3.31771	0.432897	0.583363		1.18354
orf19.736	C4_05090C_A	SRB8		0.242207	3.73843	0.0851386	0.181024		1.1828
orf19.4212	C6_00470C_A	FET99		0.241931	10.3174	0.00802345	0.0282776		1.18257
orf19.4680	C4_01090C_A			0.241912	1.78671	0.383699	0.536167		1.18256
orf19.5527	C6_02580W_A			0.241689	4.03283	0.0737094	0.162256		1.18238
orf19.548	CR_04570C_A	CDC10		0.241548	6.32114	0.02014	0.0582921		1.18226
orf19.71				0.241175	5.65323	0.0328401	0.0859261		1.18195
orf19.7044	C7_00740W_A	RIM15		0.241153	5.12196	0.0285216	0.0769658		1.18194
orf19.2127	C6_04430W_A	CST5		0.241126	3.26388	0.248492	0.394676		1.18191
orf19.4573	C4_02180C_A	ZCF26		0.240486	1.47046	0.394429	0.546877		1.18139
orf19.7187	C7_03930C_A	MAM33		0.240446	6.66133	0.0869336	0.183331		1.18136
orf19.5409	C3_00540C_A	IST1		0.240156	1.66945	0.347297	0.499967		1.18112
orf19.2662				0.239623	5.32947	0.0675166	0.151452		1.18068
orf19.3108	C4_07010C_A			0.239429	3.40187	0.11336	0.224321		1.18053
orf19.4943	C1_13160W_A	PSA2		0.239365	0.74833	0.54313	0.684306		1.18047
orf19.131.2	C6_01210W_A			0.239094	5.86447	0.0673112	0.151053		1.18025
orf19.2748	C4_02530W_A	ARG83		0.238876	4.11946	0.0838167	0.178704		1.18007
orf19.7549	CR_09770C_A	PMT5		0.238782	5.75214	0.0816885	0.174991		1.18
orf19.7098	C7_00240W_A			0.238578	5.0109	0.0459013	0.111695		1.17983
orf19.1301	C4_03770W_A			0.238408	3.3734	0.206664	0.34586		1.17969
orf19.1105.2	C5_03900W_A	PGA56		0.23828	9.63082	0.060997	0.139834		1.17959
orf19.4967	C1_13410W_A	COX19		0.238166	5.1166	0.090644	0.189827		1.17949
orf19.1665	C3_01810C_A	MNT1		0.237967	7.62712	0.0320307	0.0843371		1.17933
orf19.2961				0.23783	3.79258	0.124777	0.241464		1.17922
orf19.4383	CR_03590C_A			0.237753	1.03474	0.480779	0.627465		1.17915
orf19.394	C1_08490W_A			0.237496	5.68879	0.0189208	0.0556844		1.17894
orf19.816	C2_04040C_A	DCK2		0.236939	3.29229	0.189395	0.323349		1.17849
orf19.7165	C7_04100C_A	MED9		0.236571	3.3651	0.121229	0.235849		1.17819
orf19.3686				0.236313	3.65291	0.154076	0.28107		1.17798
orf19.6696	C7_03630C_A	TIM9		0.23619	3.83516	0.318724	0.470667		1.17788
orf19.3777	C4_05020W_A	IMG2		0.235909	1.86043	0.373887	0.526333		1.17765
orf19.4235	C5_02290W_A	PDE1		0.235419	2.33006	0.262798	0.408898		1.17725
orf19.2751	C4_02510W_A			0.235319	4.37713	0.102542	0.207998		1.17717
orf19.2434				0.235193	3.46779	0.132802	0.252742		1.17706
orf19.3168	C5_02030W_A	RPN8		0.235181	6.29903	0.0165141	0.0499012		1.17705
orf19.3639	C2_08420W_A			0.234931	1.72282	0.458815	0.60772		1.17685
orf19.3013				0.234768	6.70675	0.0151859	0.0467736		1.17672
orf19.8278	C1_11410C_A			0.234682	0.721068	0.615244	0.742204		1.17665
orf19.5034	C1_13960W_A	YBP1		0.234641	4.63349	0.216829	0.358015		1.17661
orf19.4275	C5_02610C_A	RAD9		0.234116	3.42827	0.146915	0.27132		1.17619
orf19.5813	C2_02920W_A			0.233991	4.61525	0.0708053	0.157011		1.17608
orf19.3823	C4_04580W_A	ZDS1		0.233783	7.62259	0.0158575	0.0484844		1.17591
orf19.4340	C5_03100C_A			0.233643	5.54119	0.0270968	0.0737816		1.1758
orf19.860	C2_03600W_A	BMT8		0.233513	3.91446	0.102342	0.207868		1.17569
orf19.2848	CR_02910W_A			0.233048	3.91153	0.0965455	0.199263		1.17532
orf19.3769	C4_05080C_A			0.232435	3.63062	0.107853	0.216424		1.17482
orf19.5348	C2_10690W_A	TPS3		0.231749	5.55585	0.0528636	0.12472		1.17426
orf19.2733	C4_02670W_A			0.230809	2.25289	0.289883	0.439443		1.17349
orf19.4382	CR_03600C_A			0.230581	5.06972	0.0540087	0.126815		1.17331
orf19.2476				0.230492	6.41379	0.026477	0.0725675		1.17323
orf19.245	C3_02560W_A	DDC1		0.230374	2.8288	0.188501	0.322431		1.17314
orf19.5614	C6_03260W_A			0.230308	4.0785	0.112545	0.22336		1.17309
orf19.7109	C7_00140C_A			0.230169	5.68113	0.074049	0.162674		1.17297
orf19.4456				0.230006	11.0542	0.0177598	0.0529282		1.17284
orf19.826	C2_03980C_A	MED1		0.2298	5.04203	0.0480461	0.11526		1.17267
orf19.2125	C6_04420W_A			0.229403	4.79077	0.084387	0.179708		1.17235
orf19.4061				0.229007	1.54497	0.487716	0.633684		1.17203
orf19.1552	C2_02320C_A	CPR3		0.228763	6.52795	0.015756	0.0482827		1.17183
orf19.7355	C3_05740C_A	SSN8		0.228681	2.96829	0.253733	0.400771		1.17176
orf19.2304	C1_11120C_A			0.22865	5.1662	0.0713712	0.158072		1.17174
orf19.4981	C1_13490C_A			0.228577	2.85693	0.282129	0.42973		1.17168
orf19.6080				0.227802	4.78923	0.103745	0.209546		1.17105
orf19.7319	CR_09210W_A	SUC1		0.227773	3.1694	0.254565	0.4016		1.17103
orf19.6459	C7_02500C_A	DPP3		0.227613	0.743589	0.584812	0.718953		1.1709
orf19.2298	C1_11170W_A	WBP1		0.227594	6.94763	0.0128887	0.0411951		1.17088
orf19.247	C3_02580C_A			0.22735	1.64214	0.357694	0.510214		1.17068
orf19.5662	C4_00350W_A	PEP7		0.226991	3.64392	0.136581	0.258304		1.17039
orf19.4575	C4_02160C_A			0.226923	4.34433	0.157564	0.285066		1.17034
orf19.2097	C2_00350W_A			0.226263	4.54157	0.0564819	0.131597		1.1698
orf19.711	CR_06550C_A			0.226245	0.558942	0.569479	0.707156		1.16979
orf19.1333	C7_03420C_A	SNG3		0.226124	3.16391	0.242915	0.38857		1.16969
orf19.979	C5_00190C_A	FAS1		0.226055	11.4596	0.0109548	0.0362752		1.16963
orf19.557	CR_05210W_A			0.22589	0.557286	0.564946	0.702653		1.1695
orf19.3765	C1_12510W_A	RAX2		0.2257	5.70195	0.117643	0.230609		1.16934
orf19.2328	C1_10890C_A			0.225639	5.19265	0.0362461	0.0927207		1.1693
orf19.2075	C2_00520W_A	DFG5		0.225583	5.68743	0.029464	0.0788809		1.16925
orf19.6287	CR_07620W_A	AAT21		0.225141	5.94646	0.0200661	0.0582024		1.16889
orf19.2443				0.224787	3.87399	0.111041	0.22086		1.16861
orf19.3971	C5_04850W_A			0.224593	0.68162	0.546538	0.687004		1.16845
orf19.6086				0.224565	5.09267	0.098343	0.202127		1.16842
orf19.2970				0.224367	6.51429	0.0170328	0.0511832		1.16826
orf19.1479	C2_01680C_A			0.224357	5.81719	0.0332216	0.0867151		1.16826
orf19.7149	C7_04240C_A			0.223902	5.37893	0.0451274	0.110307		1.16789
orf19.2093				0.223714	6.25413	0.0205914	0.0592823		1.16774
orf19.7554	CR_09830W_A			0.2237	3.80434	0.17357	0.305762		1.16772
orf19.7510	CR_00260W_A	KIN2		0.223676	7.25128	0.0366832	0.0934934		1.16771
orf19.1500	C2_01900C_A			0.223566	3.82739	0.154401	0.281463		1.16762
orf19.7163	C7_04120W_A			0.223351	1.57103	0.419719	0.570994		1.16744
orf19.2411	CR_03140C_A	SYN8		0.223298	2.55435	0.224021	0.366764		1.1674
orf19.2552	CR_01630C_A			0.223186	0.770165	0.579104	0.714256		1.16731
orf19.916	CR_06560C_A			0.222939	3.89501	0.123111	0.23891		1.16711
orf19.2342	C1_10770W_A	SFT2		0.222916	3.50454	0.173435	0.305624		1.16709
orf19.5552	C6_02790C_A			0.222624	3.77058	0.18552	0.318941		1.16685
orf19.428				0.222468	2.57797	0.256199	0.403257		1.16673
orf19.1279	C5_04100W_A	CDS1		0.222437	5.32059	0.0634438	0.144224		1.1667
orf19.6899	C7_01170C_A			0.222408	4.48156	0.103769	0.209546		1.16668
orf19.2014	C2_01110C_A	BCY1		0.222052	6.52316	0.0212703	0.060817		1.16639
orf19.3627	C2_08510W_A			0.222014	0.558943	0.637679	0.760003		1.16636
orf19.7111	C7_00120W_A			0.22195	4.32581	0.137979	0.260313		1.16631
orf19.2478				0.22177	1.46194	0.415888	0.567205		1.16616
orf19.2761	C4_02420C_A			0.221705	2.14541	0.340172	0.493208		1.16611
orf19.418				0.221519	7.05848	0.0199873	0.0580557		1.16596
orf19.3734	CR_02350C_A	GEF2		0.221086	4.95134	0.0471951	0.113873		1.16561
orf19.6848				0.221025	4.2813	0.072329	0.159932		1.16556
orf19.1643	C3_02030W_A			0.219823	6.36205	0.0241921	0.0675337		1.16459
orf19.6327	C6_00100C_A	HET1		0.219671	7.80831	0.0499894	0.119026		1.16447
orf19.1177	C6_00190W_A			0.219577	5.78903	0.081559	0.174843		1.16439
orf19.6458	C7_02520W_A			0.219534	1.59441	0.404667	0.556286		1.16436
orf19.6420	CR_08510W_A	PGA13		0.218474	3.35488	0.201433	0.338804		1.1635
orf19.3283	CR_00710C_A			0.21827	3.43437	0.158286	0.286086		1.16334
orf19.2463				0.217975	3.39174	0.218121	0.359336		1.1631
orf19.3574	C2_05450C_A	MDJ2		0.217191	2.15994	0.335748	0.489148		1.16247
orf19.1888	C2_07430C_A			0.216937	3.78235	0.124495	0.24125		1.16226
orf19.315	C3_03160C_A			0.216679	3.19156	0.171237	0.303117		1.16206
orf19.2923	C4_06140C_A			0.216443	3.73178	0.139278	0.261489		1.16187
orf19.5877	C3_04340W_A	ATF1		0.216357	3.71339	0.120539	0.234591		1.1618
orf19.1759	C2_10220C_A	PHO23		0.216258	5.56578	0.0352712	0.0906975		1.16172
orf19.3374	C4_03470C_A	ECE1		0.216201	0.959942	0.564174	0.702078		1.16167
orf19.7391	C3_06090C_A	OCH1		0.215982	5.36222	0.0701361	0.156101		1.16149
orf19.3409	C6_01760W_A	SEC12		0.215777	7.00274	0.0217612	0.061862		1.16133
orf19.4337	C5_03080C_A			0.21556	2.88477	0.22158	0.363865		1.16115
orf19.5397	C3_00610W_A			0.215465	3.49447	0.190358	0.324788		1.16108
orf19.4956	C1_13300C_A	RPN1		0.215316	7.62277	0.0201684	0.058343		1.16096
orf19.203	C2_09010W_A	STB3		0.215208	3.78038	0.147764	0.272424		1.16087
orf19.2135	C6_04500C_A	TSM1		0.215166	6.85188	0.0371019	0.0941258		1.16084
orf19.3335				0.21514	7.60031	0.030072	0.0799954		1.16082
orf19.7466	CR_00640W_A	ACC1		0.214903	10.5839	0.0161434	0.0491092		1.16063
orf19.7670	CR_10800C_A			0.214688	6.53657	0.0727086	0.160575		1.16045
orf19.1115	C5_03790W_A	GUK1		0.214656	5.16322	0.116259	0.228724		1.16043
orf19.1546	C2_02280W_A			0.214455	6.37281	0.0364747	0.0930568		1.16027
orf19.1960	C5_01100C_A	CLN3		0.21434	5.51068	0.0385283	0.0969284		1.16017
orf19.6437	CR_08630W_A	CDC23		0.214297	4.23859	0.117544	0.230499		1.16014
orf19.3391	C6_01910W_A	ADK1		0.214267	8.82705	0.0647675	0.146408		1.16011
orf19.6192	C3_07980C_A			0.214159	3.38368	0.29531	0.4458		1.16003
orf19.2361	CR_07040W_A	SPT10		0.2141	3.27384	0.248444	0.394676		1.15998
orf19.4825	C1_09620C_A			0.213862	3.93305	0.327347	0.480031		1.15979
orf19.1681	C3_01620W_A			0.213375	1.57816	0.423377	0.574531		1.1594
orf19.2511.1	C3_01080W_A	MRPL33		0.213015	3.39963	0.217869	0.359078		1.15911
orf19.1490	C2_01780W_A	MSB2		0.212848	7.79239	0.0293019	0.0784857		1.15897
orf19.1843	CR_06900C_A	ALG6		0.212765	3.4053	0.164564	0.293912		1.15891
orf19.1497	C2_01880C_A	ZCF6		0.212734	1.46251	0.435215	0.585742		1.15888
orf19.4201	C6_00570C_A	NHX1		0.212692	6.18459	0.0313692	0.0829984		1.15885
orf19.1676	C3_01680C_A			0.212661	3.48277	0.233004	0.377483		1.15882
orf19.3775	C4_05030C_A	SSK2		0.21227	7.17529	0.0194827	0.0570595		1.15851
orf19.2173	C2_08120W_A	MAF1		0.212168	4.90319	0.115158	0.226803		1.15843
orf19.4759	C1_09030C_A	COX5		0.212061	7.37684	0.196324	0.332666		1.15834
orf19.2629	C4_05280W_A	USO1		0.212006	6.01094	0.251658	0.398306		1.1583
orf19.5184	C7_02780W_A			0.21187	7.73331	0.0831489	0.177708		1.15819
orf19.6898	C7_01150W_A			0.211843	3.14266	0.281696	0.429191		1.15817
orf19.7260	C1_14430C_A			0.211752	4.99299	0.228728	0.372558		1.15809
orf19.5463	C3_00110C_A	SEC6		0.211536	7.39641	0.0475258	0.114518		1.15792
orf19.5133	C7_03220C_A	ZCF29		0.211443	7.22269	0.0231072	0.0650746		1.15785
orf19.5316	C2_10430C_A	FGR29		0.211411	2.30513	0.351793	0.503862		1.15782
orf19.4406	C4_05960W_A	NIF3		0.210907	5.49009	0.0454686	0.110841		1.15742
orf19.5474	C3_00010C_A			0.210378	5.2019	0.160963	0.289945		1.15699
orf19.4044	C5_05450C_A	MUM2		0.210184	2.90081	0.244186	0.389926		1.15684
orf19.1702	C3_01470W_A	ARF3		0.209995	4.28198	0.0878043	0.18488		1.15668
orf19.3929	C5_04420W_A			0.209906	3.96044	0.156363	0.283554		1.15661
orf19.1369	C2_09810C_A			0.209614	0.759371	0.535785	0.677254		1.15638
orf19.4831	C1_09680W_A	MTS1		0.209417	9.40373	0.0183953	0.0545224		1.15622
orf19.944	C5_00450C_A	IFG3		0.209022	5.29216	0.057243	0.1328		1.1559
orf19.764				0.208961	5.06889	0.0695257	0.155061		1.15586
orf19.815	C2_04050C_A	DCK1		0.208622	8.0201	0.0317385	0.0836489		1.15558
orf19.5505	C7_03720C_A	HIS7		0.208411	6.07902	0.0690861	0.154398		1.15541
orf19.5779	C2_03160C_A	RNR1		0.208292	7.89965	0.0341769	0.0887388		1.15532
orf19.1244	C4_05600W_A	GYP2		0.208061	5.97137	0.0531188	0.125105		1.15513
orf19.1842	CR_06910W_A	BUD5		0.207761	4.93852	0.0719417	0.159205		1.15489
orf19.2204	C2_07760W_A			0.207744	3.09064	0.324185	0.477042		1.15488
orf19.2072	C2_00550W_A			0.207728	2.09243	0.435493	0.585742		1.15487
orf19.4755	C1_08990C_A	KEX2		0.207707	7.55153	0.0250007	0.0692088		1.15485
orf19.4656	C4_01310W_A			0.207665	1.68283	0.428348	0.579027		1.15482
orf19.5079				0.207621	3.75988	0.252251	0.399128		1.15478
orf19.7491	CR_00410W_A	RTT109		0.207494	3.67085	0.172631	0.304592		1.15468
orf19.4186	C4_00570C_A	PCT1		0.207451	5.55916	0.0454002	0.110774		1.15465
orf19.6586	C7_01430C_A			0.207415	4.4374	0.193537	0.329279		1.15462
orf19.3199	C5_01760C_A	PIKA		0.207373	4.4974	0.0971927	0.200294		1.15458
orf19.3690.2				0.2073	7.04768	0.36528	0.517711		1.15453
orf19.206	C2_08990C_A			0.207245	5.75108	0.0411862	0.102287		1.15448
orf19.1381	C2_09710C_A			0.207161	4.31864	0.131787	0.251517		1.15441
orf19.5688	C5_00090C_A			0.207127	5.68055	0.131883	0.251613		1.15439
orf19.1382	C2_09700W_A	YEA4		0.207026	1.96114	0.406409	0.558207		1.15431
orf19.7110	C7_00130W_A			0.206863	3.74762	0.143206	0.266435		1.15418
orf19.2657	C5_03210C_A			0.206489	2.85192	0.239567	0.384708		1.15388
orf19.1192	C6_00320C_A	DNA2		0.206429	5.3025	0.0665799	0.149722		1.15383
orf19.5408	C3_00550C_A	HRK1		0.20631	6.86689	0.0286343	0.0771546		1.15373
orf19.2884	C4_06500W_A	CDC68		0.206119	6.3296	0.0334107	0.0870709		1.15358
orf19.6240				0.206098	3.91237	0.201714	0.339149		1.15356
orf19.242	C3_02510C_A	SAP8		0.205868	0.270299	0.691986	0.804056		1.15338
orf19.2257	C2_07010W_A			0.205663	7.82442	0.0682373	0.152689		1.15322
orf19.5684.1	C5_00120W_A			0.205509	4.08821	0.231058	0.375298		1.15309
orf19.2939				0.205294	1.44918	0.621631	0.747157		1.15292
orf19.4423				0.205084	5.55554	0.0462103	0.112246		1.15275
orf19.6034				0.204978	7.27557	0.138973	0.261279		1.15267
orf19.2492				0.204867	2.83969	0.313279	0.464985		1.15258
orf19.5949	C3_04830C_A	FAS2		0.204739	11.2059	0.0216697	0.0616991		1.15248
orf19.139	C6_01320W_A	TRA1		0.204159	7.86243	0.0800306	0.172188		1.15201
orf19.4147	C5_01520C_A	GLR1		0.204064	7.60987	0.0465634	0.11275		1.15194
orf19.844	C2_03770C_A	STE11		0.203845	4.76506	0.134737	0.255439		1.15176
orf19.698	CR_06640C_A			0.203787	5.42261	0.0620234	0.141828		1.15172
orf19.6846				0.203096	5.8924	0.050993	0.120991		1.15117
orf19.4848	C1_09830W_A	SKI3		0.202549	6.46958	0.0475531	0.114533		1.15073
orf19.5244	C1_12200W_A	MCD4		0.202548	3.58589	0.164799	0.29423		1.15073
orf19.2936				0.202494	0.405029	0.688832	0.801765		1.15069
orf19.6591	CR_09710W_A	PCD1		0.202476	3.26861	0.410513	0.562137		1.15067
orf19.3174	C5_01970C_A	CDC24		0.202451	6.38926	0.0452703	0.110507		1.15065
orf19.7558	CR_09860W_A	YTA6		0.202359	5.63466	0.0571264	0.1328		1.15058
orf19.3394	C6_01880W_A			0.202225	3.12755	0.275684	0.42348		1.15047
orf19.1617	C3_02290W_A			0.201868	3.59491	0.259544	0.406634		1.15019
orf19.7481	CR_00540C_A	MDH1		0.201767	7.35551	0.042691	0.105492		1.15011
orf19.905	C2_03250W_A	AVT7		0.201641	4.42771	0.217366	0.358598		1.15001
orf19.712	CR_06540W_A	KIP1		0.20157	2.5209	0.30519	0.456351		1.14995
orf19.3499	C6_02100W_A			0.201556	1.25256	0.528474	0.671046		1.14994
orf19.3190	C5_01830C_A	HAL9		0.201247	5.38688	0.0833935	0.178011		1.14969
orf19.6294	C5_01650C_A	MYO1		0.201228	5.11381	0.180096	0.313191		1.14968
orf19.6325.1	C6_00120W_A			0.201217	3.74725	0.217321	0.358598		1.14967
orf19.24	C2_06470W_A	RTA2		0.200992	3.92004	0.180901	0.313785		1.14949
orf19.5691	C5_00070W_A	CDC11		0.200232	6.54333	0.0987408	0.202714		1.14888
orf19.4906	C1_10350C_A			0.199382	6.3566	0.0458386	0.111593		1.14821
orf19.3505	C6_02060W_A	SLM2		0.19909	6.42986	0.0443418	0.109025		1.14797
orf19.6013				0.199089	2.20065	0.435809	0.585742		1.14797
orf19.1444	C2_01390W_A			0.198946	6.30805	0.0369373	0.0939718		1.14786
orf19.5544	C6_02730W_A	SAC6		0.198925	5.60169	0.059005	0.135957		1.14784
orf19.6720	C3_07670W_A			0.198893	3.82638	0.201227	0.338804		1.14782
orf19.5046	C4_03900C_A	RAM1		0.198833	3.62671	0.228982	0.372861		1.14777
orf19.7341.1	CR_09460C_A			0.198504	2.04248	0.53232	0.674142		1.14751
orf19.3331				0.196835	7.85646	0.0296303	0.0792089		1.14618
orf19.6525	C7_01960W_A			0.196508	4.66159	0.11315	0.224068		1.14592
orf19.1142	C1_11750W_A	AVT4		0.195988	3.29737	0.222082	0.36436		1.14551
orf19.4751				0.195859	5.61726	0.128212	0.245994		1.14541
orf19.5700	C5_00010W_A	TLO11		0.195846	3.94226	0.261887	0.408652		1.1454
orf19.1789	C4_05310W_A			0.195671	2.99959	0.257326	0.404431		1.14526
orf19.2580	CR_01800C_A	HST2		0.195553	2.93969	0.360911	0.513936		1.14516
orf19.1070				0.195316	1.57209	0.4712	0.619833		1.14497
orf19.1096	C6_04370W_A			0.194619	4.20607	0.137072	0.258781		1.14442
orf19.441				0.194445	7.14548	0.0942164	0.195683		1.14428
orf19.4601	C4_01910W_A			0.194271	3.5023	0.18247	0.315284		1.14415
orf19.5367	C2_10840W_A	RDH54		0.193945	4.65393	0.224088	0.366764		1.14389
orf19.7065	C7_00530C_A	PSF3		0.193642	2.52896	0.334019	0.487808		1.14365
orf19.6374	CR_08130W_A			0.193538	6.00722	0.0621169	0.141947		1.14356
orf19.2230	C2_06790W_A			0.193418	0.572058	0.636979	0.759335		1.14347
orf19.5713	C6_03480W_A	YMX6		0.193363	2.56336	0.339145	0.492113		1.14343
orf19.586	C5_00830C_A	ERV46		0.192923	6.07059	0.0433605	0.106952		1.14308
orf19.6168	C3_00910W_A			0.192709	3.16002	0.258727	0.405922		1.14291
orf19.3237	CR_01170W_A			0.192587	6.77801	0.0373482	0.0946177		1.14281
orf19.4907	C1_10360C_A			0.192161	2.21039	0.397112	0.549333		1.14247
orf19.4641	C4_01440W_A	NMT1		0.192083	5.63844	0.0656451	0.147988		1.14241
orf19.6264				0.19158	4.0061	0.1455	0.269349		1.14201
orf19.1075	C6_04190C_A			0.191552	2.97805	0.290458	0.440192		1.14199
orf19.7232	C1_14230C_A	IRR1		0.191224	5.07599	0.0898601	0.188642		1.14173
orf19.2039	C2_00850W_A	MSF1		0.191051	6.9378	0.0381527	0.0963206		1.1416
orf19.6249				0.190885	1.19194	0.587211	0.72089		1.14146
orf19.4440				0.19079	5.53612	0.0756936	0.16515		1.14139
orf19.4887	C1_10180C_A	ECM21		0.190628	4.08673	0.180747	0.313734		1.14126
orf19.5056				0.190462	1.78336	0.441254	0.590971		1.14113
orf19.5155	C7_03060C_A	CHS6		0.190458	4.7669	0.0912953	0.190896		1.14113
orf19.6953	C3_03660W_A	IRS4		0.190378	5.02984	0.135499	0.256616		1.14106
orf19.3087.2	C4_07160W_A			0.190077	0.912597	0.636441	0.759194		1.14082
orf19.7181	C7_04000W_A			0.18983	5.01806	0.116376	0.228871		1.14063
orf19.6269				0.189683	3.3778	0.238291	0.383366		1.14051
orf19.2089	C2_00420W_A			0.189498	3.26735	0.250399	0.396429		1.14037
orf19.2726	C4_02720C_A			0.189488	2.75202	0.424473	0.575297		1.14036
orf19.4954	C1_13280C_A			0.18946	5.94629	0.0610693	0.139941		1.14034
orf19.2646	C5_03330C_A	ZCF13		0.189294	4.69637	0.118078	0.231211		1.14021
orf19.7611	CR_10350C_A	TRX1		0.189227	4.14201	0.224667	0.367489		1.14015
orf19.3869	CR_06140W_A			0.189088	5.78391	0.0747902	0.163772		1.14004
orf19.2653	C5_03260C_A			0.188744	3.99015	0.277364	0.424857		1.13977
orf19.6198.1				0.188548	2.62188	0.435851	0.585742		1.13962
orf19.1865				0.18831	5.85317	0.105656	0.21296		1.13943
orf19.6912	C7_01320W_A			0.18821	3.93994	0.164363	0.293838		1.13935
orf19.7284	CR_08890C_A	ASR2		0.18817	2.66872	0.390709	0.543107		1.13932
orf19.7629	CR_10510W_A			0.188162	4.17914	0.154431	0.281463		1.13931
orf19.6030				0.188129	4.1154	0.182684	0.315365		1.13929
orf19.6812	C3_06890W_A	PMT2		0.188094	7.11091	0.0930897	0.193752		1.13926
orf19.5429	C3_00380C_A			0.187894	3.43111	0.317202	0.468675		1.1391
orf19.6561	C7_01640W_A	LAT1		0.18764	7.86086	0.0959011	0.19831		1.1389
orf19.5017	C1_13800C_A	DUR32		0.1875	2.37388	0.350198	0.50224		1.13879
orf19.5357	C2_10750C_A	AKL1		0.186309	5.98078	0.121991	0.236991		1.13785
orf19.7037	C7_00800C_A	YAE1		0.186001	3.01606	0.330976	0.484277		1.13761
orf19.4427				0.185945	5.58605	0.22652	0.36974		1.13756
orf19.7604	CR_10290C_A			0.185834	6.15136	0.0759528	0.165383		1.13747
orf19.7666	CR_10770W_A			0.185632	4.5168	0.149703	0.274878		1.13732
orf19.2663				0.184942	3.74831	0.196247	0.332638		1.13677
orf19.5234	C1_12290C_A	RBD1		0.184822	5.71461	0.104274	0.210411		1.13668
orf19.649	CR_05030W_A			0.18468	5.33936	0.107085	0.215362		1.13656
orf19.3973	C5_04870W_A			0.184635	1.73323	0.507086	0.652535		1.13653
orf19.3521	C2_04880C_A	ARH2		0.184624	3.22559	0.31833	0.470213		1.13652
orf19.4590	C4_02030W_A	RFX2		0.184552	2.91563	0.352817	0.504929		1.13646
orf19.1999	C2_01250W_A			0.184127	2.84028	0.326937	0.479661		1.13613
orf19.5138	C7_03170W_A	IFA21		0.184099	3.66484	0.212578	0.352391		1.13611
orf19.3231	CR_01230C_A	CDC27		0.184026	2.24917	0.407684	0.559251		1.13605
orf19.2697	C4_02960W_A			0.183938	6.38669	0.0497666	0.118704		1.13598
orf19.7615	CR_10390W_A			0.183904	2.94449	0.293071	0.44316		1.13595
orf19.7034	C7_00830C_A			0.183781	6.56636	0.209667	0.349166		1.13586
orf19.5854	C3_04090W_A	SBP1		0.183691	8.54268	0.0478497	0.115094		1.13579
orf19.6598	CR_09650W_A	WAL1		0.183478	5.47431	0.146687	0.271001		1.13562
orf19.745	C4_05150W_A	VAC8		0.183369	5.96021	0.0885129	0.186083		1.13553
orf19.5228	C1_12360C_A	RIB3		0.183198	6.26291	0.0738037	0.162398		1.1354
orf19.7089	C7_00320C_A	PMR1		0.182886	7.78574	0.0509346	0.120906		1.13515
orf19.1162.1	C1_11570W_A			0.182482	1.53133	0.506147	0.651481		1.13483
orf19.1282	C5_04070C_A	CKS1		0.182128	4.36316	0.193797	0.329308		1.13456
orf19.1198	C6_00360C_A			0.181859	3.15223	0.316513	0.468166		1.13434
orf19.229	C3_02410C_A			0.181747	3.86219	0.187834	0.321595		1.13426
orf19.2929				0.181072	8.96586	0.174883	0.307377		1.13373
orf19.1109	C5_03850W_A			0.180828	4.62771	0.578089	0.713777		1.13353
orf19.5629	C6_03400C_A	QCR7		0.180648	4.85127	0.344772	0.497764		1.13339
orf19.3592	C2_08790W_A	JEM1		0.180291	4.38896	0.187091	0.320662		1.13311
orf19.6538	C7_01820C_A	VMA11		0.179967	5.5894	0.146692	0.271001		1.13286
orf19.4439.1				0.179568	0.879164	0.614251	0.741201		1.13254
orf19.7360	C3_05790C_A			0.179307	1.30049	0.581297	0.716255		1.13234
orf19.5644	C4_00190W_A			0.178994	2.86807	0.386303	0.538916		1.13209
orf19.7158	C7_04160W_A			0.178948	1.57799	0.636771	0.759274		1.13206
orf19.1693	C3_01530C_A	CAS4		0.178944	7.29536	0.0499761	0.119026		1.13205
orf19.1950	C5_01200W_A			0.178723	1.5282	0.559704	0.698374		1.13188
orf19.7342	CR_09470W_A	AXL1		0.178716	0.906048	0.634684	0.757932		1.13188
orf19.1011	CR_05300C_A	MNN21		0.178613	5.67911	0.1218	0.236791		1.1318
orf19.3352				0.178564	2.92908	0.393845	0.546207		1.13176
orf19.5654	C4_00280W_A	STE24		0.178501	6.29559	0.145709	0.269644		1.13171
orf19.2533.1	CR_01490C_A			0.178316	6.55374	0.211681	0.351656		1.13156
orf19.1727	C3_01250W_A	PMC1		0.178206	6.37654	0.0802606	0.172481		1.13148
orf19.895	C2_03330C_A	HOG1		0.17813	6.87287	0.117394	0.230287		1.13142
orf19.4747				0.178113	4.34031	0.280699	0.428032		1.1314
orf19.6554	C7_01700W_A			0.176765	2.86014	0.397578	0.549777		1.13035
orf19.2622	CR_07520C_A	YPT31		0.17673	6.1649	0.0661945	0.149041		1.13032
orf19.5383	C3_00720W_A	PMA1		0.176684	11.1926	0.080279	0.172481		1.13028
orf19.522	CR_04340W_A	PIM1		0.175852	8.61634	0.0535222	0.125836		1.12963
orf19.3846	C4_04410C_A	LYS4		0.175779	7.27825	0.0831859	0.177708		1.12957
orf19.2763	C4_02400C_A			0.175711	2.28235	0.431762	0.582373		1.12952
orf19.1057				0.175465	3.9032	0.201446	0.338804		1.12933
orf19.301	C3_03050C_A	PGA18		0.175183	4.40732	0.262308	0.40878		1.12911
orf19.2104	C2_00290W_A			0.17483	3.61834	0.244317	0.389986		1.12883
orf19.3133	C4_06760W_A	GUT2		0.174682	9.15802	0.0501414	0.119336		1.12872
orf19.5269	C1_11970C_A			0.174477	4.69373	0.181462	0.314357		1.12856
orf19.6091				0.174052	6.73659	0.144375	0.267997		1.12822
orf19.3601	C2_08740W_A			0.173651	1.70403	0.532328	0.674142		1.12791
orf19.2614	CR_02140W_A	RSR1		0.173424	5.82535	0.177958	0.310287		1.12773
orf19.1514	C2_02000W_A			0.173395	6.28162	0.127196	0.244786		1.12771
orf19.4010	C5_05170W_A	PAN3		0.173274	4.94078	0.134251	0.254786		1.12761
orf19.4771				0.173121	4.14401	0.28305	0.43089		1.12749
orf19.1591	C2_04310W_A	ERG10		0.173054	7.67137	0.0569511	0.132519		1.12744
orf19.1852	CR_06820W_A			0.172968	3.1216	0.374623	0.527097		1.12738
orf19.7538	CR_00060C_A			0.17288	6.01766	0.212312	0.352252		1.12731
orf19.6337	C6_00030W_A	TLO13		0.17287	4.68533	0.186514	0.320143		1.1273
orf19.3689				0.172738	4.83609	0.175016	0.307435		1.1272
orf19.5236	C1_12270W_A	SRT1		0.172505	1.89683	0.525931	0.668381		1.12701
orf19.3240	CR_01140C_A	ERG27		0.172381	5.24114	0.127371	0.244812		1.12692
orf19.3646	C6_00790C_A	CTR1		0.172295	3.75285	0.239394	0.384618		1.12685
orf19.3613	C2_08630C_A			0.17208	5.4874	0.114105	0.225175		1.12668
orf19.5087				0.171651	5.40613	0.141707	0.264365		1.12635
orf19.1893	C2_07390C_A			0.171606	4.54686	0.164223	0.293685		1.12631
orf19.6329	C6_00080C_A			0.171335	4.18019	0.212303	0.352252		1.1261
orf19.4768				0.170995	1.43946	0.552949	0.692175		1.12583
orf19.2444				0.170898	4.08432	0.296578	0.446844		1.12576
orf19.2187	C2_07940C_A	ALG7		0.170867	5.40524	0.102597	0.208032		1.12574
orf19.6003	C3_05250C_A			0.170862	3.14109	0.313939	0.465042		1.12573
orf19.4919	C1_12890W_A			0.170739	0.903137	0.6802	0.794959		1.12564
orf19.4545				0.170442	6.35729	0.0795053	0.171398		1.1254
orf19.2680	C4_03110W_A			0.17033	6.99793	0.0757633	0.165235		1.12532
orf19.122	C6_01150W_A	CDC20		0.169848	3.48719	0.278293	0.42544		1.12494
orf19.1630	C3_02160C_A			0.16955	6.0603	0.10364	0.209443		1.12471
orf19.2069	C2_00580C_A	SMF3		0.169443	6.5224	0.0725203	0.160224		1.12462
orf19.6604				0.169257	4.33409	0.211221	0.351214		1.12448
orf19.2278	C2_07220W_A			0.169077	4.55771	0.176121	0.308853		1.12434
orf19.7271	C1_14530W_A			0.168901	5.367	0.16266	0.291756		1.1242
orf19.5323	C2_10480W_A	MDH1-3		0.168642	4.89201	0.17206	0.304008		1.124
orf19.7130	C7_04320W_A			0.16859	0.846548	0.618538	0.745004		1.12396
orf19.7489	CR_00440C_A	LRG1		0.168298	7.6479	0.0986639	0.202633		1.12373
orf19.6373	CR_08120C_A	DCP2		0.167562	7.29472	0.0982574	0.20208		1.12316
orf19.3188	C5_01840C_A	TAC1		0.167521	5.07237	0.176182	0.308859		1.12313
orf19.274	C3_02830W_A	TFC4		0.166491	4.44233	0.185699	0.318945		1.12233
orf19.6860	C4_05210W_A			0.16648	3.57286	0.360462	0.513431		1.12232
orf19.1311	C4_03670W_A	SPO75		0.166274	5.14745	0.218462	0.359617		1.12216
orf19.4669	C4_01200C_A	AAT22		0.166201	4.54291	0.246602	0.392396		1.1221
orf19.7023	C7_00910C_A			0.166195	4.14876	0.219408	0.360846		1.1221
orf19.2213	C2_07690W_A			0.166159	2.66232	0.454383	0.603618		1.12207
orf19.3289				0.166063	4.55316	0.276246	0.423623		1.12199
orf19.3579	C2_05500W_A	ATP4		0.16568	9.35464	0.0764614	0.16626		1.12169
orf19.7067	C7_00520W_A			0.165593	8.47734	0.110193	0.219656		1.12163
orf19.7403	C3_06290W_A			0.165419	4.53428	0.181407	0.314357		1.12149
orf19.906	C2_03240C_A	ROM2		0.165382	7.1077	0.107494	0.216023		1.12146
orf19.328	C3_03290C_A	NPR2		0.165352	4.18255	0.262622	0.40878		1.12144
orf19.1493	C2_01840C_A	RAD7		0.165161	3.49086	0.309937	0.461586		1.12129
orf19.3298				0.165122	5.89312	0.210596	0.35039		1.12126
orf19.4620	C4_01740W_A	TIM12		0.165053	2.76203	0.477457	0.624783		1.12121
orf19.4430				0.163968	5.49855	0.11265	0.223406		1.12036
orf19.352	C3_03540W_A			0.163955	4.40957	0.239591	0.384708		1.12035
orf19.4230	C5_02230W_A			0.163815	6.25147	0.116434	0.228901		1.12025
orf19.4265	C5_02530W_A	UAP1		0.163116	4.54982	0.192792	0.328425		1.1197
orf19.1621	C3_02240C_A	GPA2		0.162911	4.72179	0.159561	0.287911		1.11954
orf19.2843	CR_02860W_A	RHO1		0.162836	7.1103	0.0867352	0.183298		1.11949
orf19.1712	C3_01390C_A	GEA2		0.162408	5.07434	0.140737	0.263227		1.11915
orf19.6235				0.16201	1.93809	0.521367	0.664337		1.11884
orf19.794	C2_04260W_A	SSN3		0.162001	3.21899	0.373014	0.525601		1.11884
orf19.1793	C4_05350W_A			0.161774	2.37976	0.423647	0.574609		1.11866
orf19.3644	C6_00800C_A			0.161638	5.73062	0.129717	0.248003		1.11856
orf19.109	C6_01050W_A			0.161577	5.4926	0.127918	0.245677		1.11851
orf19.4248	C5_02400W_A			0.161133	6.49735	0.113276	0.224238		1.11817
orf19.3681				0.160292	6.68338	0.101622	0.206828		1.11751
orf19.7076	C7_00440C_A	GBP2		0.159876	9.01648	0.138431	0.260512		1.11719
orf19.3568	C2_05370C_A	RXT3		0.15981	4.41496	0.254628	0.4016		1.11714
orf19.4914.1	C1_12850W_A	BLP1		0.159807	2.88667	0.42614	0.576836		1.11714
orf19.5188	C7_02770W_A	CHS1		0.159535	3.95355	0.27421	0.422053		1.11693
orf19.4348	C5_03160W_A	MED14		0.15946	4.89372	0.272473	0.420214		1.11687
orf19.4600.1	C4_01920W_A	DPM3		0.159343	5.09877	0.155469	0.282535		1.11678
orf19.1170	C1_11500C_A	ARO7		0.1591	3.84435	0.283708	0.43165		1.11659
orf19.4185	C4_00580W_A			0.158741	2.25999	0.48404	0.630519		1.11631
orf19.2113	C2_00190C_A			0.158724	6.54379	0.0930581	0.193752		1.1163
orf19.1653	C3_01950C_A			0.158336	2.68254	0.39776	0.549777		1.116
orf19.4005	C5_05130C_A			0.158322	3.7864	0.287176	0.435948		1.11599
orf19.1910	C2_00110W_A			0.158102	5.0587	0.248816	0.395075		1.11582
orf19.5221	C1_12430W_A			0.157817	3.8488	0.32358	0.47641		1.1156
orf19.55				0.157711	3.4615	0.313786	0.465042		1.11552
orf19.4211				0.15762	11.5166	0.075231	0.164471		1.11545
orf19.1350	C2_08330W_A			0.157605	5.04784	0.16574	0.295523		1.11543
orf19.490	CR_04070W_A	NAT5		0.157531	5.25999	0.154519	0.28153		1.11538
orf19.831	C2_03930C_A			0.157502	4.22942	0.317194	0.468675		1.11535
orf19.2812	C3_03980C_A			0.157478	3.14483	0.335158	0.488743		1.11534
orf19.5469	C3_00030C_A			0.157175	5.17427	0.183746	0.316862		1.1151
orf19.2459				0.157084	5.62363	0.127339	0.244812		1.11503
orf19.3087.1	C4_07170C_A			0.157039	2.297	0.459007	0.607797		1.115
orf19.4187	C4_00560C_A	MMM1		0.156204	4.04708	0.310163	0.46167		1.11435
orf19.5757	C6_03820C_A			0.156202	2.88646	0.378252	0.530963		1.11435
orf19.3714	CR_07850W_A			0.156034	3.96585	0.271783	0.419654		1.11422
orf19.5591	C6_03080C_A	ADO1		0.155896	6.32048	0.155413	0.282535		1.11411
orf19.7335	CR_09380W_A	PRE8		0.155713	6.25341	0.132985	0.252914		1.11397
orf19.2410	CR_03150W_A	SYS3		0.155708	5.66038	0.136793	0.258435		1.11397
orf19.4014	C5_05210W_A			0.155663	5.16288	0.211362	0.351277		1.11393
orf19.3581	C2_05510C_A			0.155339	3.80063	0.304771	0.456208		1.11368
orf19.6889	C2_05780C_A	MKK2		0.15486	5.49603	0.18955	0.323511		1.11331
orf19.3589	C2_08820C_A	SPO11		0.154812	0.420391	0.765605	0.856568		1.11328
orf19.3293				0.15481	5.09344	0.232166	0.3768		1.11328
orf19.4400	CR_03560W_A			0.154744	3.60106	0.38622	0.538916		1.11322
orf19.6792	C3_07080W_A	RRD1		0.15474	1.99023	0.545185	0.685903		1.11322
orf19.6178	C3_07830W_A	FBP1		0.154615	6.35923	0.150511	0.276175		1.11312
orf19.1223	C2_06670C_A	DBF2		0.154517	3.10741	0.413665	0.565026		1.11305
orf19.2982				0.153702	2.1587	0.493389	0.639003		1.11242
orf19.6797	C3_07030C_A			0.153322	2.99402	0.406733	0.558441		1.11213
orf19.2416.1	CR_03090C_A	MLC1		0.153305	5.88742	0.116675	0.229291		1.11211
orf19.4781				0.153192	4.49036	0.21622	0.357228		1.11203
orf19.2178.1	C2_08060W_A			0.153188	0.784479	0.668249	0.785222		1.11202
orf19.7595	CR_10190C_A			0.152816	1.57366	0.563348	0.701308		1.11174
orf19.5376	C3_00790W_A			0.152309	4.08319	0.312898	0.464593		1.11135
orf19.5245	C1_12190W_A	BUL4		0.15206	1.68949	0.617943	0.74477		1.11115
orf19.3443	C6_01410C_A	OYE2		0.15191	4.31229	0.233079	0.377492		1.11104
orf19.2671	C4_03190W_A			0.151605	5.64239	0.175457	0.307887		1.1108
orf19.50				0.151456	3.81767	0.389215	0.541725		1.11069
orf19.2965				0.151243	7.6652	0.0997783	0.204612		1.11053
orf19.6092				0.151119	7.75017	0.149366	0.274446		1.11043
orf19.2501	C3_00980W_A	FLC1		0.150948	6.07338	0.21407	0.35443		1.1103
orf19.993	C1_10500W_A			0.1509	2.126	0.537023	0.678345		1.11026
orf19.6457	C7_02530C_A			0.15068	2.91125	0.446685	0.596676		1.11009
[truncated: 3,425 more rows]
