# Supplementary material for: The Candida albicans Cdk8-dependent phosphoproteome reveals repression of hyphal growth through a Flo8-dependent pathway
Source: PLoS Genet. 2022 Jan 4;18(1):e1009622. doi: 10.1371/journal.pgen.1009622 (PMC8769334; doi:10.1371/journal.pgen.1009622)
Supplement: S3 Table — Sheet one provides an annotated summary of phosphopeptides statistically significantly altered by drug treatment of compared to drug treatment of wild type. Sheet two provides the data with each replicate of the triplicate experiment. (XLSX) [file pgen.1009622.s005.xlsx]

## Sheet: Legend
		Table S3: Phosphoproteomic analysis of the effect of 3-MB-PP1 on Ssn3AS versus WT. "Summary annotated" sheet provides an annotated summary of phosphopeptides statistically significantly altered by drug treatment of compared to drug treatment of WT. "Each run" sheet provides the data with each replicate of the triplicate experiment parsed individually. The amino acid positions for Flo8 phosphosite…

## Sheet: Summary annotated
The amino acid positions for Flo8 phosphosites were shifted by 25 amino acids due to misannotation of the start in the original library used to analyze the mass spectrometry data.
modsites		Uniprot	Average Log2 as-ssn3/SC5314	pvalue	Orf19.	Entrez ID	Gene name
S506,S506	K.RLS#IGPQRNQLR.Q	Q59VX8	-5.48265	0.00445914	Orf19.3680	3644596	42985	septin	Septin, required for wild-type invasive growth in vitro but not required for virulence in a mouse model of systemic infection; localizes to hyphal septum or bud neck; Asn-rich; aberrant gel mobility; phosphorylated in vitro by Gin4p
S446:S454,S446:S454	K.STS#M*LIDDHPS#SSPKLK.N	Q59VX8	-2.13128	0.0184669	Orf19.3680	3644596	42985	septin	Septin, required for wild-type invasive growth in vitro but not required for virulence in a mouse model of systemic infection; localizes to hyphal septum or bud neck; Asn-rich; aberrant gel mobility; phosphorylated in vitro by Gin4p
S454,S454	K.KSTSM*LIDDHPS#SSPK.L	Q59VX8	-1.85362	0.0117794	Orf19.3680	3644596	42985	septin	Septin, required for wild-type invasive growth in vitro but not required for virulence in a mouse model of systemic infection; localizes to hyphal septum or bud neck; Asn-rich; aberrant gel mobility; phosphorylated in vitro by Gin4p
S456,S456	K.STSM*LIDDHPSSS#PKLK.N	Q59VX8	-1.56868	0.0429224	Orf19.3680	3644596	42985	septin	Septin, required for wild-type invasive growth in vitro but not required for virulence in a mouse model of systemic infection; localizes to hyphal septum or bud neck; Asn-rich; aberrant gel mobility; phosphorylated in vitro by Gin4p
S455,S455	K.STSM*LIDDHPSS#SPKLK.N	Q59VX8	-1.48057	0.0483929	Orf19.3680	3644596	42985	septin	Septin, required for wild-type invasive growth in vitro but not required for virulence in a mouse model of systemic infection; localizes to hyphal septum or bud neck; Asn-rich; aberrant gel mobility; phosphorylated in vitro by Gin4p
S454,S454	K.STSM*LIDDHPS#SSPKLK.N	Q59VX8	-0.667202	0.0457986	Orf19.3680	3644596	42985	septin	Septin, required for wild-type invasive growth in vitro but not required for virulence in a mouse model of systemic infection; localizes to hyphal septum or bud neck; Asn-rich; aberrant gel mobility; phosphorylated in vitro by Gin4p
S22,S22	R.NTSKNTSVVDPDHSS#PIINYR.K	Q59VX8	-0.581041	0.00757669	Orf19.3680	3644596	42985	septin	Septin, required for wild-type invasive growth in vitro but not required for virulence in a mouse model of systemic infection; localizes to hyphal septum or bud neck; Asn-rich; aberrant gel mobility; phosphorylated in vitro by Gin4p
S665:S668,S665:S668	K.DETLTDLHS#IVS#NH.-	Q59VX8	-0.486552	0.00768006	Orf19.3680	3644596	42985	septin	Septin, required for wild-type invasive growth in vitro but not required for virulence in a mouse model of systemic infection; localizes to hyphal septum or bud neck; Asn-rich; aberrant gel mobility; phosphorylated in vitro by Gin4p
S668,S668	K.DETLTDLHSIVS#NH.-	Q59VX8	-0.408278	0.0286687	Orf19.3680	3644596	42985	septin	Septin, required for wild-type invasive growth in vitro but not required for virulence in a mouse model of systemic infection; localizes to hyphal septum or bud neck; Asn-rich; aberrant gel mobility; phosphorylated in vitro by Gin4p
S22,S22	K.NTSVVDPDHSS#PIINYR.K	Q59VX8	0.183371	0.0480099	Orf19.3680	3644596	42985	septin	Septin, required for wild-type invasive growth in vitro but not required for virulence in a mouse model of systemic infection; localizes to hyphal septum or bud neck; Asn-rich; aberrant gel mobility; phosphorylated in vitro by Gin4p
S21,S21	K.NTSVVDPDHS#SPIINYRK.D	Q59VX8	0.18773	0.0195893	Orf19.3680	3644596	42985	septin	Septin, required for wild-type invasive growth in vitro but not required for virulence in a mouse model of systemic infection; localizes to hyphal septum or bud neck; Asn-rich; aberrant gel mobility; phosphorylated in vitro by Gin4p
T659:S665:S668,T659:S665:S668	R.LQKDET#LTDLHS#IVS#NH.-	Q59VX8	0.267365	0.0332357	Orf19.3680	3644596	42985	septin	Septin, required for wild-type invasive growth in vitro but not required for virulence in a mouse model of systemic infection; localizes to hyphal septum or bud neck; Asn-rich; aberrant gel mobility; phosphorylated in vitro by Gin4p
S61	K.LINS#PDYNHEYLSISGFAPFTESAAK.V	Q59N40	-1.85161	0.029817	Orf19.6287	3647241	AAT21	aspartate transaminase	Putative aspartate aminotransferase; stationary phase enriched protein; Gcn4-regulated; Spider biofilm induced
S296	R.IIRSELS#NPPAYGSK.I	Q59N40	-0.779778	0.0171758	Orf19.6287	3647241	AAT21	aspartate transaminase	Putative aspartate aminotransferase; stationary phase enriched protein; Gcn4-regulated; Spider biofilm induced
S30,S30	R.RGVS#PSTGGVASAYGNESEK.K	Q5ADX5	0.344793	0.0179026	Orf19.6716	3638456	ABD1	mRNA (guanine-N7)-methyltransferase	SAM-dependent RNA methyltransferase; methylates mRNA 5' cap; binds phosphorylated RNA Pol II C-term domain peptide; does not bind mRNA TPase and mRNA GTase (Cet1,Cgt1); functional homolog of S. cerevisiae Abd1; rat catheter biofilm induced
T397	K.KFEEKANIAGDT#PSLPTR.N	Q5AFA8	-0.892834	0.000530374	Orf19.2699	3637875	ABP1	Abp1p	Ortholog of S. cerevisiae Abp1; actin-binding protein of the cortical actin cytoskeleton; caspofungin induced; protein only detected in stationary phase yeast-form cultures; Spider biofilm repressed
S141	R.YS#TQTSGLK.K	Q5AFA8	0.659503	0.0035029	Orf19.2699	3637875	ABP1	Abp1p	Ortholog of S. cerevisiae Abp1; actin-binding protein of the cortical actin cytoskeleton; caspofungin induced; protein only detected in stationary phase yeast-form cultures; Spider biofilm repressed
T397	K.ANIAGDT#PSLPTR.N	Q5AFA8	0.747128	0.0147313	Orf19.2699	3637875	ABP1	Abp1p	Ortholog of S. cerevisiae Abp1; actin-binding protein of the cortical actin cytoskeleton; caspofungin induced; protein only detected in stationary phase yeast-form cultures; Spider biofilm repressed
S1202	K.HAAS#VSDLTFVVDSKTEHSTR.T	A0A1D8PRR7	-1.38592	0.00354545	Orf19.7466	3639688	ACC1	acetyl-CoA carboxylase	Putative acetyl-coenzyme-A carboxylases; regulated by Efg1; amphotericin B repressed; caspofungin repressed; 5'-UTR intron; gene used for strain identification by multilocus sequence typing; Hap43-induced; flow model biofilm repressed
S1202	K.HAAS#VSDLTFVVDSK.T	A0A1D8PRR7	0.896846	9.42934e-05	Orf19.7466	3639688	ACC1	acetyl-CoA carboxylase	Putative acetyl-coenzyme-A carboxylases; regulated by Efg1; amphotericin B repressed; caspofungin repressed; 5'-UTR intron; gene used for strain identification by multilocus sequence typing; Hap43-induced; flow model biofilm repressed
S1204	K.HAASVS#DLTFVVDSK.T	A0A1D8PRR7	0.91722	0.000176903	Orf19.7466	3639688	ACC1	acetyl-CoA carboxylase	Putative acetyl-coenzyme-A carboxylases; regulated by Efg1; amphotericin B repressed; caspofungin repressed; 5'-UTR intron; gene used for strain identification by multilocus sequence typing; Hap43-induced; flow model biofilm repressed
T241:S245,T241:S245	R.VTT#PSQS#PFVQQPQTM*K.Q	Q59RR0	-0.296997	0.014837	Orf19.6124	3646034	ACE2	DNA-binding transcription factor	Transcription factor; similar to S. cerevisiae Ace2 and Swi5; regulates morphogenesis, cell separation, adherence, virulence in a mice; mutant is hyperfilamentous; rat catheter and Spider biofilm induced
S396,S396	R.AAS#IIKDAGAHGLK.S	P82611	0.391997	0.00316412	Orf19.6385	3642090	ACO1	aconitate hydratase	Aconitase; induced in high iron; 2 upstream CCAAT motifs; amino acid starvation (3-AT), amphotericin B, phagocytosis, farnesol induced; Hap43, fluconazole-repressed; Gcn4-regulated; antigenic in infection; flow and Spider biofilm repressed
T2	-.T#PTAM*PTEQTHNVVHEANGVKLR.E	A0A1D8PD92	-3.67552	0.000685315	Orf19.1064	3644710	ACS2	acetate--CoA ligase	Acetyl-CoA synthetase; antigenic during human and murine infection; induced by Efg1; macrophage-induced protein; soluble protein in hyphae; gene contains intron; flow model and Spider biofilm repressed
T2	-.T#PTAM*PTEQTHNVVHEANGVK.L	A0A1D8PD92	-0.775458	0.0130019	Orf19.1064	3644710	ACS2	acetate--CoA ligase	Acetyl-CoA synthetase; antigenic during human and murine infection; induced by Efg1; macrophage-induced protein; soluble protein in hyphae; gene contains intron; flow model and Spider biofilm repressed
T2	-.M*T#PTAM*PTEQTHNVVHEANGVK.L	A0A1D8PD92	-0.285302	0.012604	Orf19.1064	3644710	ACS2	acetate--CoA ligase	Acetyl-CoA synthetase; antigenic during human and murine infection; induced by Efg1; macrophage-induced protein; soluble protein in hyphae; gene contains intron; flow model and Spider biofilm repressed
T605,T605	R.KT#IGPFAAPK.S	Q8NJN3	1.1263	0.0392722	Orf19.1064	3644710	ACS2	acetate--CoA ligase	Acetyl-CoA synthetase; antigenic during human and murine infection; induced by Efg1; macrophage-induced protein; soluble protein in hyphae; gene contains intron; flow model and Spider biofilm repressed
S61	R.HQGIM*VGM*GQKDSYVGDEAQS#KR.G	A0A1D8PFR4	-0.709001	0.00573581	Orf19.5007	3636195	ACT1	actin	Actin; gene has intron; transcript regulated by growth phase, starvation; at polarized growth site in budding and hyphal cells; required for wild-type Cdc42 localization; unprocessed N terminus; Hap43-induced; Spider biofilm repressed
S61	K.DSYVGDEAQS#KR.G	A0A1D8PFR4	0.838005	0.000784697	Orf19.5007	3636195	ACT1	actin	Actin; gene has intron; transcript regulated by growth phase, starvation; at polarized growth site in budding and hyphal cells; required for wild-type Cdc42 localization; unprocessed N terminus; Hap43-induced; Spider biofilm repressed
S350,S350	R.NKFS#PQPEFR.S	Q59WH0	0.700098	0.00366333	Orf19.2331	3644450	ADA2	chromatin-binding transcription regulator	Zinc finger and homeodomain transcriptional coactivator; role in cell wall integrity and in sensitivity to caspofungin; required for the normal transcriptional response to caspofungin; required for yeast cell adherence to silicone substrate
S196	K.QQSTNTDEPSS#PTTNGNGK.R	A0A1D8PGW0	0.401762	0.00998181	Orf19.868	3637342	ADAEC	Adaecp	Protein of unknown function; transcription is specific to white cell type
S280	K.STTSSSVTS#PQLTATTTK.K	A0A1D8PGW0	0.479856	0.00996459	Orf19.868	3637342	ADAEC	Adaecp	Protein of unknown function; transcription is specific to white cell type
T70	K.T#LHPAVHGGILAR.N	Q5A6R2	-0.592313	0.0408947	Orf19.492	3641024	ADE17	bifunctional phosphoribosylaminoimidazolecarboxamide formyltransferase/IMP cyclohydrolase	5-Aminoimidazole-4-carboxamide ribotide transformylase, enzyme of adenine biosynthesis; antigenic in human; soluble protein in hyphae; not induced during GCN response, in contrast to the S. cerevisiae ortholog
S215	K.S#LGAEAYVDFTKDKDIVEAVKK.A	A0A1D8PP43	-1.17944	0.00533886	Orf19.3997	3636489	ADH1	Adh1p	Alcohol dehydrogenase; oxidizes ethanol to acetaldehyde; at yeast cell surface; immunogenic in humans/mice; complements S. cerevisiae adh1 adh2 adh3 mutant; fluconazole, farnesol-induced; flow model biofilm induced; Spider biofilm repressed
S215	K.S#LGAEAYVDFTKDKDIVEAVK.K	A0A1D8PP43	-0.498653	0.00290892	Orf19.3997	3636489	ADH1	Adh1p	Alcohol dehydrogenase; oxidizes ethanol to acetaldehyde; at yeast cell surface; immunogenic in humans/mice; complements S. cerevisiae adh1 adh2 adh3 mutant; fluconazole, farnesol-induced; flow model biofilm induced; Spider biofilm repressed
S312	K.DTAEAIDFFS#R.G	A0A1D8PP43	0.554553	0.00951544	Orf19.3997	3636489	ADH1	Adh1p	Alcohol dehydrogenase; oxidizes ethanol to acetaldehyde; at yeast cell surface; immunogenic in humans/mice; complements S. cerevisiae adh1 adh2 adh3 mutant; fluconazole, farnesol-induced; flow model biofilm induced; Spider biofilm repressed
T30	K.DYPVPT#PKPNELLIHVK.Y	A0A1D8PP43	0.585058	0.00417663	Orf19.3997	3636489	ADH1	Adh1p	Alcohol dehydrogenase; oxidizes ethanol to acetaldehyde; at yeast cell surface; immunogenic in humans/mice; complements S. cerevisiae adh1 adh2 adh3 mutant; fluconazole, farnesol-induced; flow model biofilm induced; Spider biofilm repressed
S290	K.VTAPVFDAVVKS#IEIK.G	A0A1D8PP43	1.01366	0.0065695	Orf19.3997	3636489	ADH1	Adh1p	Alcohol dehydrogenase; oxidizes ethanol to acetaldehyde; at yeast cell surface; immunogenic in humans/mice; complements S. cerevisiae adh1 adh2 adh3 mutant; fluconazole, farnesol-induced; flow model biofilm induced; Spider biofilm repressed
S709	K.S#KGGEEETILR.L	A0A1D8PT53	0.874136	0.00938914	Orf19.459	3642458	ADP1	putative ATP-dependent permease	Putative PDR-subfamily ABC transporter; similar to WHITE subfamily proteins; gene used for strain identification by multilocus sequence typing
S205,S205	K.SQDGDDDDDDDDDDEEM*ANS#EDENDHDESGNASTK.N	Q5AF56	-1.52239	0.0455241	Orf19.2752	3637866	ADR1	DNA-binding transcription factor	C2H2 transcription factor; ortholog of S. cerevisiae Adr1 but mutant phenotype suggests a different set of target genes; transposon mutation affects filamentous growth; Spider biofilm induced
S1261,S1261	K.NDNNSS#PFANTDLIFELNHR.Y	Q5AF56	0.728039	0.00314184	Orf19.2752	3637866	ADR1	DNA-binding transcription factor	C2H2 transcription factor; ortholog of S. cerevisiae Adr1 but mutant phenotype suggests a different set of target genes; transposon mutation affects filamentous growth; Spider biofilm induced
S715:S718	K.SRFS#RVS#LPK.K	A0A1D8PMU9	-0.831296	0.0118944	Orf19.980	3641594	AFL1	inositol polyphosphate kinase	Ortholog(s) have inositol heptakisphosphate kinase activity, inositol hexakisphosphate 1-kinase activity, inositol hexakisphosphate 3-kinase activity, inositol hexakisphosphate 4-kinase activity, inositol hexakisphosphate 6-kinase activity
S226	K.GQPLEEKS#PESK.L	A0A1D8PD25	-0.961251	0.0018424	Orf19.3050	3636913	AGE1	Age1p	Putative GTPase activator; induced in low iron; rat catheter biofilm repressed
S212	R.SS#FSLATKGQPLEEKSPESK.L	A0A1D8PD25	-0.394092	0.042377	Orf19.3050	3636913	AGE1	Age1p	Putative GTPase activator; induced in low iron; rat catheter biofilm repressed
S701	R.S#ISPISLTSKAPPIEKDYLQM*VR.S	A0A1D8PD25	-0.273355	0.00953402	Orf19.3050	3636913	AGE1	Age1p	Putative GTPase activator; induced in low iron; rat catheter biofilm repressed
S703	R.SIS#PISLTSKAPPIEKDYLQM*VR.S	A0A1D8PD25	-0.234015	0.0206833	Orf19.3050	3636913	AGE1	Age1p	Putative GTPase activator; induced in low iron; rat catheter biofilm repressed
S703:S706	R.SIS#PIS#LTSK.A	A0A1D8PD25	0.286996	0.00582528	Orf19.3050	3636913	AGE1	Age1p	Putative GTPase activator; induced in low iron; rat catheter biofilm repressed
S701:S706	R.S#ISPIS#LTSK.A	A0A1D8PD25	0.291805	0.00982085	Orf19.3050	3636913	AGE1	Age1p	Putative GTPase activator; induced in low iron; rat catheter biofilm repressed
S212	R.SS#FSLATK.G	A0A1D8PD25	0.325433	0.00279959	Orf19.3050	3636913	AGE1	Age1p	Putative GTPase activator; induced in low iron; rat catheter biofilm repressed
S211	R.S#SFSLATK.G	A0A1D8PD25	0.351266	0.00447933	Orf19.3050	3636913	AGE1	Age1p	Putative GTPase activator; induced in low iron; rat catheter biofilm repressed
S701:S703	K.LITEFKDKPIIPGQDRS#IS#PISLTSK.A	A0A1D8PD25	0.398116	0.0125022	Orf19.3050	3636913	AGE1	Age1p	Putative GTPase activator; induced in low iron; rat catheter biofilm repressed
S703	R.SIS#PISLTSK.A	A0A1D8PD25	0.668586	5.09e-05	Orf19.3050	3636913	AGE1	Age1p	Putative GTPase activator; induced in low iron; rat catheter biofilm repressed
T188	K.SHSNTTLSNDINLLDDNSGNKSNDEEFGSFTAT#R.S	A0A1D8PIG1	-0.778535	0.00883798	Orf19.1396	3643810	AGE2	Age2p	Ortholog(s) have GTPase activator activity, role in ER to Golgi vesicle-mediated transport, intra-Golgi vesicle-mediated transport and Golgi apparatus, clathrin-coated vesicle localization
S370	K.TTS#SLNVNGLDDDLFK.N	A0A1D8PIG1	0.537474	0.000397255	Orf19.1396	3643810	AGE2	Age2p	Ortholog(s) have GTPase activator activity, role in ER to Golgi vesicle-mediated transport, intra-Golgi vesicle-mediated transport and Golgi apparatus, clathrin-coated vesicle localization
T154	R.GRPT#PVPLTNEQKQKNEAYFADLGAK.N	A0A1D8PCP6	-1.64621	6.82692e-05	Orf19.3683	3644565	AGE3	Age3p	Putative ADP-ribosylation factor GTPase activating protein, functional ortholog of S. cerevisiae GCS1; mutation affects endocytosis, hyphal growth, chemical and drug resistance, and sensitivity to cell wall inhibitors
T154	R.GRPT#PVPLTNEQKQK.N	A0A1D8PCP6	-0.758943	3.33439e-05	Orf19.3683	3644565	AGE3	Age3p	Putative ADP-ribosylation factor GTPase activating protein, functional ortholog of S. cerevisiae GCS1; mutation affects endocytosis, hyphal growth, chemical and drug resistance, and sensitivity to cell wall inhibitors
S553	R.TGLEEIERHEYEYYEQLEQSS#NKPDNK.F	Q5AMG7	-1.98071	0.021993	Orf19.4679	3635684	AGP2	Agp2p	Amino acid permease; hyphal repressed; white-opaque switch regulated; induced in core caspofungin response, during cell wall regeneration, by flucytosine; regulated by Sef1, Sfu1, and Hap43; rat catheter and Spider biofilm induced
Y545	R.TGLEEIERHEYEY#YEQLEQSSNKPDNKFK.S	Q5AMG7	-1.49631	0.00268862	Orf19.4679	3635684	AGP2	Agp2p	Amino acid permease; hyphal repressed; white-opaque switch regulated; induced in core caspofungin response, during cell wall regeneration, by flucytosine; regulated by Sef1, Sfu1, and Hap43; rat catheter and Spider biofilm induced
S151	K.DIQLS#QDKVTSTYTK.A	A0A1D8PU72	0.282233	0.0486283	Orf19.7602	3638933	AHA1	Aha1p	Putative Hsp90p co-chaperone; Hap43-repressed; heavy metal (cadmium) stress-induced; oxidative stress-induced via Cap1; rat catheter biofilm induced; flow model biofilm repressed
S682	R.VGSSTHNPSQFSLQEEVIDFAS#DDENPDNGSHM*SR.L	Q5A5P2	-3.3491	0.00718599	Orf19.5357	3641237	AKL1	serine/threonine protein kinase	Putative serine/threonine protein kinase; induced during the mating process
S459	K.STEPSRSTSIKTS#HSDAVSTK.G	Q5A5P2	-1.62307	0.00521454	Orf19.5357	3641237	AKL1	serine/threonine protein kinase	Putative serine/threonine protein kinase; induced during the mating process
S632	R.YSKSNNIS#EVSLIDM*DDSQLK.T	Q5A5P2	-0.725222	0.0173719	Orf19.5357	3641237	AKL1	serine/threonine protein kinase	Putative serine/threonine protein kinase; induced during the mating process
S461	R.STSIKTSHS#DAVSTK.G	Q5A5P2	-0.69447	0.0435335	Orf19.5357	3641237	AKL1	serine/threonine protein kinase	Putative serine/threonine protein kinase; induced during the mating process
S455	R.STS#IKTSHSDAVSTK.G	Q5A5P2	-0.664595	0.00372922	Orf19.5357	3641237	AKL1	serine/threonine protein kinase	Putative serine/threonine protein kinase; induced during the mating process
S632:S635	R.YSKSNNIS#EVS#LIDM*DDSQLK.T	Q5A5P2	0.525266	0.0136542	Orf19.5357	3641237	AKL1	serine/threonine protein kinase	Putative serine/threonine protein kinase; induced during the mating process
S813,S813	K.KLS#ISVLDK.Q	Q5A8K2	0.628208	0.00544777	Orf19.5746	3640285	ALA1	alanine--tRNA ligase	Alanyl-tRNA synthetase; translational regulation generates cytoplasmic and mitochondrial forms; Gcn4p-regulated; repressed by amino acid starvation (3-AT); translation-related genes downregulated upon phagocytosis by murine macrophages
S45	K.TFEVIS#PSTEEK.I	A0A1D8PGT5	0.391734	0.00912822	Orf19.5806	3643026	ALD5	aldehyde dehydrogenase (NAD(P)(+))	NAD-aldehyde dehydrogenase; decreased expression in fluconazole-resistant isolate, or in hyphae; biofilm induced; fluconazole-downregulated; protein abundance is affected by URA3 expression in the CAI-4 strain; stationary phase enriched
S246	K.VAFTGS#TATGK.I	A0A1D8PGT5	0.397957	0.00695809	Orf19.5806	3643026	ALD5	aldehyde dehydrogenase (NAD(P)(+))	NAD-aldehyde dehydrogenase; decreased expression in fluconazole-resistant isolate, or in hyphae; biofilm induced; fluconazole-downregulated; protein abundance is affected by URA3 expression in the CAI-4 strain; stationary phase enriched
S15	R.NKS#IISLSSTTTEYPK.G	A0A1D8PM94	0.466857	0.0393501	Orf19.742	3647407	ALD6	Ald6p	Putative aldehyde dehydrogenase; stationary phase enriched protein; expression regulated upon white-opaque switch; rat catheter biofilm induced; rat catheter and Spider biofilm induced
S13	K.KPSTPQS#PK.D	A0A1D8PTC1	0.190575	0.0107492	Orf19.1843	3647316	ALG6	dolichyl-P-Glc:Man(9)GlcNAc(2)-PP-dolichol alpha-1,3-glucosyltransferase	Putative glucosyltransferase involved in cell wall mannan biosynthesis; transcription is elevated in chk1, nik1, and sln1 homozygous null mutants; repressed by nitric oxide; possibly essential gene, disruptants not obtained by UAU1 method
T18	K.DST#PVVYSSK.K	A0A1D8PTC1	0.218297	0.0419683	Orf19.1843	3647316	ALG6	dolichyl-P-Glc:Man(9)GlcNAc(2)-PP-dolichol alpha-1,3-glucosyltransferase	Putative glucosyltransferase involved in cell wall mannan biosynthesis; transcription is elevated in chk1, nik1, and sln1 homozygous null mutants; repressed by nitric oxide; possibly essential gene, disruptants not obtained by UAU1 method
S16,S16	K.STGPQPSLSSS#PNGR.A	Q5AJD2	0.264087	0.00663814	Orf19.1659	3636562	ALG8	dolichyl-P-Glc:Glc1Man(9)GlcNAc(2)-PP-dolichol alpha-1,3-glucosyltransferase	Putative glucosyltransferase involved in cell wall mannan biosynthesis; transcription is elevated in nik1 and sln1 homozygous null mutants, but not in the chk1 null mutant; possibly an essential gene, disruptants not obtained by UAU1 method
T266	K.LPT#PEPEPEKESDEKK.-	A0A1D8PJ73	0.652201	0.0156206	Orf19.1710	3636635	ALI1	Ali1p	Putative NADH-ubiquinone oxidoreductase; in detergent-resistant membrane fraction (possible lipid raft component); predicted N-terminal acetylation; nitric oxide-repressed; plasma membrane-localized; protein decreases in stationary phase
S167	R.RKS#QLENLPPLIKK.K	A0A1D8PJF5	-0.681551	0.000191734	Orf19.1607	3636616	ALR1	Mg(2+) transporter	Putative transporter of divalent cations; hyphal-induced expression; rat catheter biofilm induced
T202	K.M*KT#NDSEDITNTTSTTANHM*K.L	A0A1D8PJF5	-0.668542	0.0039508	Orf19.1607	3636616	ALR1	Mg(2+) transporter	Putative transporter of divalent cations; hyphal-induced expression; rat catheter biofilm induced
T180:S186	K.KKT#IGRNNS#NNFENDLVSPM*TK.M	A0A1D8PJF5	-0.553229	0.0396731	Orf19.1607	3636616	ALR1	Mg(2+) transporter	Putative transporter of divalent cations; hyphal-induced expression; rat catheter biofilm induced
S167	R.RKS#QLENLPPLIK.K	A0A1D8PJF5	-0.271971	0.00297495	Orf19.1607	3636616	ALR1	Mg(2+) transporter	Putative transporter of divalent cations; hyphal-induced expression; rat catheter biofilm induced
S680	R.KQS#PELFEQLIKDKVGIR.T	Q5AF38	-0.495327	0.00315429	Orf19.2768	3637882	AMS1	alpha-mannosidase	Putative alpha-mannosidase; transcript regulated by Nrg1; induced during cell wall regeneration; flow model biofilm induced; Spider biofilm induced
S680	R.KQS#PELFEQLIK.D	Q5AF38	0.552495	0.00213606	Orf19.2768	3637882	AMS1	alpha-mannosidase	Putative alpha-mannosidase; transcript regulated by Nrg1; induced during cell wall regeneration; flow model biofilm induced; Spider biofilm induced
S73,S73	K.KLEDLS#PSTHNM*EVPNVSR.Q	O94083	-1.33664	0.0279543	Orf19.3426	3641648	ANB1	translation elongation factor eIF-5A	Translation initiation factor eIF-5A; repressed in hyphae vs yeast cells; downregulated upon phagocytosis by murine macrophage; Hap43-induced; GlcNAc-induced protein; Spider biofilm repressed
T51	K.SGSNGIPT#PPSESDLEDSVYKQKVDEDNGLKYK.N	Q5AAQ7	-0.809203	2.76803e-05	Orf19.6254	3639516	ANT1	Ant1p	Peroxisomal adenine nucleotide transporter; role in beta-oxidation of medium-chain fatty acid and peroxisome proliferation; rat catheter biofilm induced
S56	K.SGSNGIPTPPSES#DLEDSVYK.Q	Q5AAQ7	-0.629902	0.00447489	Orf19.6254	3639516	ANT1	Ant1p	Peroxisomal adenine nucleotide transporter; role in beta-oxidation of medium-chain fatty acid and peroxisome proliferation; rat catheter biofilm induced
S54	K.SGSNGIPTPPS#ESDLEDSVYKQKVDEDNGLKYK.N	Q5AAQ7	-0.434791	0.0105883	Orf19.6254	3639516	ANT1	Ant1p	Peroxisomal adenine nucleotide transporter; role in beta-oxidation of medium-chain fatty acid and peroxisome proliferation; rat catheter biofilm induced
S924	K.SESIS#PDVESENASITNTIVSETDTDM*NKK.K	A0A1D8PJJ8	-0.538984	0.0312749	Orf19.248	3638377	APL5	Apl5p	Ortholog of S. cerevisiae and S. pombe Apl5; subunit of the AP-3 adaptor complex involved in Golgi-to-vacuole transport; phosphorylated protein; mutant is viable;
S933	K.IKSESISPDVESENAS#ITNTIVSETDTDM*NKK.K	A0A1D8PJJ8	-0.362565	0.0393972	Orf19.248	3638377	APL5	Apl5p	Ortholog of S. cerevisiae and S. pombe Apl5; subunit of the AP-3 adaptor complex involved in Golgi-to-vacuole transport; phosphorylated protein; mutant is viable;
T166	R.RST#INPLLGK.S	Q5A2L1	-0.346551	0.0107549	Orf19.2194	3642297	APM4	Apm4p	Cargo-binding subunit of the clathrin associated protein complex (AP-2), involved in endocytosis
S165	R.S#TINPLLGK.S	Q5A2L1	-0.2448	0.0448637	Orf19.2194	3642297	APM4	Apm4p	Cargo-binding subunit of the clathrin associated protein complex (AP-2), involved in endocytosis
S6:S7:T11	-.VAESS#S#IDNT#PNDVEAQRPVYEPK.Y	Q5A1Z4	-1.46699	0.0151176	Orf19.2849	3642587	AQY1	Aqy1p	Aquaporin water channel; osmotic shock resistance, WT freeze tolerance; virulent in mice; flucytosine repressed; flow model/RPMI/Spider/rat catheter biofilm induced; required for RPMI biofilm formation; Bcr1-induced in a/a RPMI biofilms
S5:S6:S7	-.VAES#S#S#IDNTPNDVEAQRPVYEPK.Y	Q5A1Z4	-1.01389	0.0382392	Orf19.2849	3642587	AQY1	Aqy1p	Aquaporin water channel; osmotic shock resistance, WT freeze tolerance; virulent in mice; flucytosine repressed; flow model/RPMI/Spider/rat catheter biofilm induced; required for RPMI biofilm formation; Bcr1-induced in a/a RPMI biofilms
S5:S6	-.VAES#S#SIDNTPNDVEAQRPVYEPK.Y	Q5A1Z4	-0.626067	0.0022534	Orf19.2849	3642587	AQY1	Aqy1p	Aquaporin water channel; osmotic shock resistance, WT freeze tolerance; virulent in mice; flucytosine repressed; flow model/RPMI/Spider/rat catheter biofilm induced; required for RPMI biofilm formation; Bcr1-induced in a/a RPMI biofilms
S7:T11	-.VAESSS#IDNT#PNDVEAQRPVYEPK.Y	Q5A1Z4	-0.560931	0.00551281	Orf19.2849	3642587	AQY1	Aqy1p	Aquaporin water channel; osmotic shock resistance, WT freeze tolerance; virulent in mice; flucytosine repressed; flow model/RPMI/Spider/rat catheter biofilm induced; required for RPMI biofilm formation; Bcr1-induced in a/a RPMI biofilms
S5	-.VAES#SSIDNTPNDVEAQRPVYEPK.Y	Q5A1Z4	-0.499338	0.00292222	Orf19.2849	3642587	AQY1	Aqy1p	Aquaporin water channel; osmotic shock resistance, WT freeze tolerance; virulent in mice; flucytosine repressed; flow model/RPMI/Spider/rat catheter biofilm induced; required for RPMI biofilm formation; Bcr1-induced in a/a RPMI biofilms
S5:S7	-.VAES#SS#IDNTPNDVEAQRPVYEPK.Y	Q5A1Z4	-0.449876	0.0099935	Orf19.2849	3642587	AQY1	Aqy1p	Aquaporin water channel; osmotic shock resistance, WT freeze tolerance; virulent in mice; flucytosine repressed; flow model/RPMI/Spider/rat catheter biofilm induced; required for RPMI biofilm formation; Bcr1-induced in a/a RPMI biofilms
S6:S7	-.VAESS#S#IDNTPNDVEAQRPVYEPK.Y	Q5A1Z4	-0.43313	0.0181231	Orf19.2849	3642587	AQY1	Aqy1p	Aquaporin water channel; osmotic shock resistance, WT freeze tolerance; virulent in mice; flucytosine repressed; flow model/RPMI/Spider/rat catheter biofilm induced; required for RPMI biofilm formation; Bcr1-induced in a/a RPMI biofilms
S6	-.VAESS#SIDNTPNDVEAQRPVYEPK.Y	Q5A1Z4	-0.305252	0.0034933	Orf19.2849	3642587	AQY1	Aqy1p	Aquaporin water channel; osmotic shock resistance, WT freeze tolerance; virulent in mice; flucytosine repressed; flow model/RPMI/Spider/rat catheter biofilm induced; required for RPMI biofilm formation; Bcr1-induced in a/a RPMI biofilms
S7	-.VAESSS#IDNTPNDVEAQRPVYEPK.Y	Q5A1Z4	-0.301926	0.000477331	Orf19.2849	3642587	AQY1	Aqy1p	Aquaporin water channel; osmotic shock resistance, WT freeze tolerance; virulent in mice; flucytosine repressed; flow model/RPMI/Spider/rat catheter biofilm induced; required for RPMI biofilm formation; Bcr1-induced in a/a RPMI biofilms
S29	K.YDDS#VNVSPLK.N	Q5A1Z4	0.217233	0.00677584	Orf19.2849	3642587	AQY1	Aqy1p	Aquaporin water channel; osmotic shock resistance, WT freeze tolerance; virulent in mice; flucytosine repressed; flow model/RPMI/Spider/rat catheter biofilm induced; required for RPMI biofilm formation; Bcr1-induced in a/a RPMI biofilms
T144	K.EAEKSAT#PEPKAK.A	A0A1D8PSC8	-1.90609	0.00020159	Orf19.2422	3645108	ARC1	Arc1p	Putative G4 nucleic acid binding protein; macrophage/pseudohyphal-repressed; protein enriched in stationary phase yeast-form cultures; Spider biofilm repressed
T144	K.KPAKEAEKSAT#PEPK.A	A0A1D8PSC8	-0.64181	0.00911137	Orf19.2422	3645108	ARC1	Arc1p	Putative G4 nucleic acid binding protein; macrophage/pseudohyphal-repressed; protein enriched in stationary phase yeast-form cultures; Spider biofilm repressed
S142:T144	K.EAEKS#AT#PEPKAK.A	A0A1D8PSC8	-0.635375	0.00157708	Orf19.2422	3645108	ARC1	Arc1p	Putative G4 nucleic acid binding protein; macrophage/pseudohyphal-repressed; protein enriched in stationary phase yeast-form cultures; Spider biofilm repressed
S142:T144	K.KKPAKEAEKS#AT#PEPK.A	A0A1D8PSC8	-0.535945	0.0101522	Orf19.2422	3645108	ARC1	Arc1p	Putative G4 nucleic acid binding protein; macrophage/pseudohyphal-repressed; protein enriched in stationary phase yeast-form cultures; Spider biofilm repressed
T144	K.EAEKSAT#PEPK.A	A0A1D8PSC8	0.395479	0.0150985	Orf19.2422	3645108	ARC1	Arc1p	Putative G4 nucleic acid binding protein; macrophage/pseudohyphal-repressed; protein enriched in stationary phase yeast-form cultures; Spider biofilm repressed
S142:T144	K.EAEKS#AT#PEPK.A	A0A1D8PSC8	0.498962	0.0441321	Orf19.2422	3645108	ARC1	Arc1p	Putative G4 nucleic acid binding protein; macrophage/pseudohyphal-repressed; protein enriched in stationary phase yeast-form cultures; Spider biofilm repressed
S84	K.QKS#NNQDSPVDLNGVIVDVSKREK.I	Q59Z52	-1.44529	7.27463e-05	Orf19.2248	3643526	ARE2	sterol acyltransferase	Acyl CoA:sterol acyltransferase; uses cholesterol and oleoyl-CoA substrates; protoberberine derivative drug inhibits enzyme activity; ketoconazole-induced; Hap43-repressed; flow model biofilm induced; Spider biofilm induced
T4	-.GRT#NTSDQLNAISDKNTKR.K	Q59Z52	-0.637474	0.0333798	Orf19.2248	3643526	ARE2	sterol acyltransferase	Acyl CoA:sterol acyltransferase; uses cholesterol and oleoyl-CoA substrates; protoberberine derivative drug inhibits enzyme activity; ketoconazole-induced; Hap43-repressed; flow model biofilm induced; Spider biofilm induced
T4	R.T#NTSDQLNAISDKNTKR.K	Q59Z52	0.250863	0.00464949	Orf19.2248	3643526	ARE2	sterol acyltransferase	Acyl CoA:sterol acyltransferase; uses cholesterol and oleoyl-CoA substrates; protoberberine derivative drug inhibits enzyme activity; ketoconazole-induced; Hap43-repressed; flow model biofilm induced; Spider biofilm induced
S764	K.LDNS#DGDATTTTTAVVDDHKK.V	A0A1D8PEG7	-0.291956	0.0475211	Orf19.4766	3634775	ARG81	Arg81p	Zn(II)2Cys6 transcription factor; required for utilization of ornithine as a nitrogen source and for wild-type resistance to caffeine; required for yeast cell adherence to silicone substrate
S9	-.TPIQQTPS#VHNTIDDSSNGFPNQISLGEYLFYR.I	Q59MU3	-3.12289	0.0015904	Orf19.1847	3647320	ARO10	phenylpyruvate decarboxylase	Aromatic decarboxylase; Ehrlich fusel oil pathway of aromatic alcohol biosynthesis; alkaline repressed; protein abundance affected by URA3 expression in CAI-4 strain; Spider biofilm induced
S112	K.LSTPRDEKDLVEIQSGTENGLTLGS#PIGM*IVR.N	A0A1D8PTK1	-0.538306	0.0042836	Orf19.3489	3648190	ARO2	bifunctional chorismate synthase/riboflavin reductase [NAD(P)H]	#N/A
S121,S121	K.GLINDPDVDNS#FDINRGLK.I	P79023	-0.369272	0.0210641	Orf19.4060	3647668	ARO4	3-deoxy-7-phosphoheptulonate synthase	3-deoxy-D-arabinoheptulosonate-7-phosphate synthase; aromatic amino acid biosynthesis; GCN-regulated; feedback-inhibited by tyrosine if produced in S. cerevisiae Aro3p and Aro4p catalyze same reaction; protein decreases in stationary phase
S26	R.QTS#PLKGIFK.Y	A0A1D8PG20	-0.485476	0.00278109	Orf19.2098	3638828	ARO8	bifunctional 2-aminoadipate transaminase/aromatic-amino-acid:2-oxoglutarate transaminase	Aromatic transaminase of the Ehrlich fusel oil pathway of aromatic alcohol biosynthesis; Rim101 independent alkaline induction; protein abundance affected by URA3 expression in CAI-4 strain; Gcn4-regulated; stationary phase enriched
S23	-.SIVEPEVAESTGGDAPQTSVKS#PEPSYQQSSQAQGK.Y	A0A1D8PCY0	-0.287444	0.027448	Orf19.3012	3636808	ARO80	Aro80p	Zn(II)2Cys6 transcription factor; transcriptional activator of aromatic amino acid catabolism; regulator of aromatic alcohol biosynthesis via the Ehrlich pathway; mutant is viable
S350	R.KNDDEEEDS#NQSTPKPEVNIR.G	A0A1D8PQ46	-0.607352	0.00266116	Orf19.5623	3639201	ARP4	Arp4p	Subunit of the NuA4 histone acetyltransferase complex
S351	R.KNDDDEEEDS#NQSTPKPEVNIR.G	Q5AC48	-0.468148	0.0264256	Orf19.5623	3639201	ARP4	Arp4p	Subunit of the NuA4 histone acetyltransferase complex
S353	R.KNDDEEEDSNQS#TPKPEVNIR.G	A0A1D8PQ46	-0.423537	0.0202421	Orf19.5623	3639201	ARP4	Arp4p	Subunit of the NuA4 histone acetyltransferase complex
S351	R.VRKNDDDEEEDS#NQSTPKPEVNIR.G	Q5AC48	-0.40509	0.00891116	Orf19.5623	3639201	ARP4	Arp4p	Subunit of the NuA4 histone acetyltransferase complex
T355	R.VRKNDDDEEEDSNQST#PKPEVNIR.G	Q5AC48	-0.373925	0.0019063	Orf19.5623	3639201	ARP4	Arp4p	Subunit of the NuA4 histone acetyltransferase complex
S61,S61	K.LTGGEDNQYGIPKKS#FK.G	P83774	0.705498	0.00240594	Orf19.6906	3645907	ASC1	guanine nucleotide-binding protein subunit beta	40S ribosomal subunit similar to G-beta subunits; glucose or N starvation induced filamentation; required for virulence in mice; snoRNA snR24 encoded in ASC1 intron; repressed in stationary phase; GlcNAc-induced; Spider biofilm repressed
S323	K.FTAFVLAS#PVKK.N	A0A1D8PKC6	1.25819	0.000533318	Orf19.7377	3641729	ASE1	Ase1p	Putative microtubule-associated protein; member of conserved Mcm1p regulon; periodic mRNA expression, peak at cell-cycle G2/M phase
S282,S282	R.TLSVGS#FDDSSNSAVSSPR.E	Q59LV8	-2.58967	0.0412364	Orf19.166	3647687	ASG1	Asg1p	Gal4p family zinc-finger transcription factor with similarity to S. cerevisiae Asg1p
S293,S293	R.TLSVGSFDDSSNSAVSS#PR.E	Q59LV8	-0.815984	0.043071	Orf19.166	3647687	ASG1	Asg1p	Gal4p family zinc-finger transcription factor with similarity to S. cerevisiae Asg1p
S289:S293,S289:S293	R.TLSVGSFDDSSNS#AVSS#PR.E	Q59LV8	-0.771446	0.0102558	Orf19.166	3647687	ASG1	Asg1p	Gal4p family zinc-finger transcription factor with similarity to S. cerevisiae Asg1p
S293,S293	R.RTLSVGSFDDSSNSAVSS#PR.E	Q59LV8	-0.482149	0.00564933	Orf19.166	3647687	ASG1	Asg1p	Gal4p family zinc-finger transcription factor with similarity to S. cerevisiae Asg1p
T277,T277	R.RT#LSVGSFDDSSNSAVSSPR.E	Q59LV8	-0.476587	0.00611623	Orf19.166	3647687	ASG1	Asg1p	Gal4p family zinc-finger transcription factor with similarity to S. cerevisiae Asg1p
S279,S279	R.RTLS#VGSFDDSSNSAVSSPR.E	Q59LV8	-0.287492	0.045869	Orf19.166	3647687	ASG1	Asg1p	Gal4p family zinc-finger transcription factor with similarity to S. cerevisiae Asg1p
S72,S72	K.SNSNLQPIAM*TPSVS#STSLAINKPK.S	Q59LV8	0.38716	0.011738	Orf19.166	3647687	ASG1	Asg1p	Gal4p family zinc-finger transcription factor with similarity to S. cerevisiae Asg1p
S58,S58	R.TAPPS#PPYETATPTR.A	Q5A5Q6	-1.19408	0.000417844	Orf19.5343	3641249	ASH1	DNA-binding transcription repressor	GATA-like transcription factor; localizes to daughter cell, hyphal tip cell nuclei; mRNA localization mediated by She3; required for WT virulence and filamentous growth on solid media; Ras1 repressed in yeast, Cyr1 repressed yeast, hyphae
T54:S58,T54:S58	R.T#APPS#PPYETATPTR.A	Q5A5Q6	-0.725083	0.00882377	Orf19.5343	3641249	ASH1	DNA-binding transcription repressor	GATA-like transcription factor; localizes to daughter cell, hyphal tip cell nuclei; mRNA localization mediated by She3; required for WT virulence and filamentous growth on solid media; Ras1 repressed in yeast, Cyr1 repressed yeast, hyphae
T54:S58,T54:S58	K.RART#APPS#PPYETATPTR.A	Q5A5Q6	-0.671637	0.0388364	Orf19.5343	3641249	ASH1	DNA-binding transcription repressor	GATA-like transcription factor; localizes to daughter cell, hyphal tip cell nuclei; mRNA localization mediated by She3; required for WT virulence and filamentous growth on solid media; Ras1 repressed in yeast, Cyr1 repressed yeast, hyphae
S42,S42	R.SYS#DDLNISTK.R	Q5A5Q6	-0.330861	0.0271654	Orf19.5343	3641249	ASH1	DNA-binding transcription repressor	GATA-like transcription factor; localizes to daughter cell, hyphal tip cell nuclei; mRNA localization mediated by She3; required for WT virulence and filamentous growth on solid media; Ras1 repressed in yeast, Cyr1 repressed yeast, hyphae
S22,S22	R.SRS#FELFQEAK.T	Q5A5Q6	0.179367	0.037852	Orf19.5343	3641249	ASH1	DNA-binding transcription repressor	GATA-like transcription factor; localizes to daughter cell, hyphal tip cell nuclei; mRNA localization mediated by She3; required for WT virulence and filamentous growth on solid media; Ras1 repressed in yeast, Cyr1 repressed yeast, hyphae
S338,S338	K.FIPIS#PPSAK.K	Q5A5Q6	0.765897	0.000211859	Orf19.5343	3641249	ASH1	DNA-binding transcription repressor	GATA-like transcription factor; localizes to daughter cell, hyphal tip cell nuclei; mRNA localization mediated by She3; required for WT virulence and filamentous growth on solid media; Ras1 repressed in yeast, Cyr1 repressed yeast, hyphae
S329	K.QQQQQRES#LNFQSDNDQQQGLQRFPNTPK.Y	Q5AMH1	-0.759381	0.030361	Orf19.4675	3635656	ASK1	Ask1p	Essential subunit of the Dam1 (DASH) complex, which acts in chromosome segregation by coupling kinetochores to spindle microtubules
S291	R.IESILNS#SPILPEPPVLQSEIGSETPKYM*SSSSPM*K.K	Q5AMH1	-0.236135	0.0158692	Orf19.4675	3635656	ASK1	Ask1p	Essential subunit of the Dam1 (DASH) complex, which acts in chromosome segregation by coupling kinetochores to spindle microtubules
S503	R.FFSTGGS#NNDNHTETQDNSK.S	Q5AMH1	0.811743	0.00158611	Orf19.4675	3635656	ASK1	Ask1p	Essential subunit of the Dam1 (DASH) complex, which acts in chromosome segregation by coupling kinetochores to spindle microtubules
S20	K.KDDVDNINS#QAGK.Y	A0A1D8PEZ0	1.01008	8.48599e-06	Orf19.2344	3644402	ASR1	Asr1p	Heat shock protein; transcript regulated by cAMP, osmotic stress, ciclopirox olamine, ketoconazole; repressed by Cyr1, Ras1; colony morphology-related regulated by Ssn6; stationary phase enriched; Hap43-induced; Spider biofilm induced
S406,S406	K.KNDSVVRSPS#PTTATTATPR.Q	Q5A649	-1.20071	0.000995929	Orf19.3841	3641175	ATG1	serine/threonine protein kinase	Putative protein serine/threonine kinase; predicted role in vesicle formation in autophagy and the cytoplasm-to-vacuole targeting (Cvt) pathway; Spider biofilm induced
S493,S493	R.KNS#DVDQTNRLASSQQQTETASYR.R	Q5A649	-0.898699	0.0241997	Orf19.3841	3641175	ATG1	serine/threonine protein kinase	Putative protein serine/threonine kinase; predicted role in vesicle formation in autophagy and the cytoplasm-to-vacuole targeting (Cvt) pathway; Spider biofilm induced
S533:S537,S533:S537	R.RIS#LSLS#PTNALTK.A	Q5A649	-0.446898	0.00723263	Orf19.3841	3641175	ATG1	serine/threonine protein kinase	Putative protein serine/threonine kinase; predicted role in vesicle formation in autophagy and the cytoplasm-to-vacuole targeting (Cvt) pathway; Spider biofilm induced
S429,S429	K.ITS#PVPDDFALSIAR.N	Q5A649	-0.426946	0.00464289	Orf19.3841	3641175	ATG1	serine/threonine protein kinase	Putative protein serine/threonine kinase; predicted role in vesicle formation in autophagy and the cytoplasm-to-vacuole targeting (Cvt) pathway; Spider biofilm induced
S537,S537	R.RISLSLS#PTNALTK.A	Q5A649	-0.285906	0.0167342	Orf19.3841	3641175	ATG1	serine/threonine protein kinase	Putative protein serine/threonine kinase; predicted role in vesicle formation in autophagy and the cytoplasm-to-vacuole targeting (Cvt) pathway; Spider biofilm induced
S444,S444	R.NSS#EFNLK.K	Q5A649	0.645082	0.0178154	Orf19.3841	3641175	ATG1	serine/threonine protein kinase	Putative protein serine/threonine kinase; predicted role in vesicle formation in autophagy and the cytoplasm-to-vacuole targeting (Cvt) pathway; Spider biofilm induced
S9	K.S#VGSSVM*DPNEPPVGKVEVSGDGGEFVVINR.H	A0A1D8PJ22	-0.816263	0.0176952	Orf19.6169	3647761	ATO1	Ato1p	Putative fungal-specific transmembrane protein; induced by Rgt1; Spider biofilm induced
S9:S12	K.S#VGS#SVM*DPNEPPVGK.V	A0A1D8PJ22	0.680606	0.000101096	Orf19.6169	3647761	ATO1	Ato1p	Putative fungal-specific transmembrane protein; induced by Rgt1; Spider biofilm induced
S9	K.S#VGSSVM*DPNEPPVGK.V	A0A1D8PJ22	0.914443	0.00257044	Orf19.6169	3647761	ATO1	Ato1p	Putative fungal-specific transmembrane protein; induced by Rgt1; Spider biofilm induced
S12:S13	K.SVGS#S#IIDANQGPIKK.V	A0A1D8PJ42	-0.606149	0.00819453	Orf19.2496	3639845	ATO2	Ato2p	Putative fungal-specific transmembrane protein; fluconazole repressed, Hap43-repressed; flow model biofilm induced; Spider biofilm induced
S12:S13	K.SVGS#S#IIDANQGPIK.K	A0A1D8PJ42	-0.554698	0.00166167	Orf19.2496	3639845	ATO2	Ato2p	Putative fungal-specific transmembrane protein; fluconazole repressed, Hap43-repressed; flow model biofilm induced; Spider biofilm induced
S9	K.S#VGSSIIDANQGPIK.K	A0A1D8PJ42	-0.270105	0.0255451	Orf19.2496	3639845	ATO2	Ato2p	Putative fungal-specific transmembrane protein; fluconazole repressed, Hap43-repressed; flow model biofilm induced; Spider biofilm induced
S12	K.SVGS#SIIDANQGPIKK.V	A0A1D8PJ42	-0.142857	0.040713	Orf19.2496	3639845	ATO2	Ato2p	Putative fungal-specific transmembrane protein; fluconazole repressed, Hap43-repressed; flow model biofilm induced; Spider biofilm induced
S179	K.APGILPRRS#VHEPM*QTGLK.S	A0A1D8PDC4	-1.71914	0.000250706	Orf19.6854	3646134	ATP1	F1F0 ATP synthase subunit alpha	ATP synthase alpha subunit; antigenic in human/mouse; at hyphal surface; ciclopirox, ketoconazole, flucytosine induced; Efg1, caspofungin repressed; may be essential; sumoylation target; stationary phase-enriched; Spider biofilm repressed
S58	K.AAPTEVSSILEDRIRGVS#EEANLNETGR.V	A0A1D8PDC4	-0.83597	0.00861112	Orf19.6854	3646134	ATP1	F1F0 ATP synthase subunit alpha	ATP synthase alpha subunit; antigenic in human/mouse; at hyphal surface; ciclopirox, ketoconazole, flucytosine induced; Efg1, caspofungin repressed; may be essential; sumoylation target; stationary phase-enriched; Spider biofilm repressed
S71	R.IRGVSEEANLNETGRVLS#VGDGIAR.I	A0A1D8PDC4	-0.551499	0.048895	Orf19.6854	3646134	ATP1	F1F0 ATP synthase subunit alpha	ATP synthase alpha subunit; antigenic in human/mouse; at hyphal surface; ciclopirox, ketoconazole, flucytosine induced; Efg1, caspofungin repressed; may be essential; sumoylation target; stationary phase-enriched; Spider biofilm repressed
S179	R.RS#VHEPM*QTGLK.S	A0A1D8PDC4	0.196073	0.00449054	Orf19.6854	3646134	ATP1	F1F0 ATP synthase subunit alpha	ATP synthase alpha subunit; antigenic in human/mouse; at hyphal surface; ciclopirox, ketoconazole, flucytosine induced; Efg1, caspofungin repressed; may be essential; sumoylation target; stationary phase-enriched; Spider biofilm repressed
S366	R.GIS#ELGIYPAVDPLDSK.S	A0A1D8PKZ9	-0.56216	0.00620669	Orf19.5653	3645039	ATP2	F1F0 ATP synthase subunit beta	F1 beta subunit of F1F0 ATPase complex; antigenic in human, mice; induced by ciclopirox olamine; caspofungin repressed; macrophage/pseudohyphal-induced; detected during exponential and stationary growth phases; Spider biofilm repressed
T122	R.T#NHIEAVNKR.I	Q59ZE0	-1.38222	0.000346923	Orf19.3579	3643418	ATP4	F1F0 ATP synthase subunit 4	Putative F0-ATP synthase subunit 4; macrophage/pseudohyphal-induced; present in exponential and stationary growth phases
T149	R.LQT#SIGKSSFVGEGK.T	Q5A7P7	-1.4403	0.0020092	Orf19.5419	3640521	ATP5	F1F0 ATP synthase subunit 5	Putative F0-ATP synthase FO subunit B; caspofungin repressed; protein level decreased in stationary phase yeast cultures; Spider biofilm repressed
S388:T392,S388:T392	R.VYQESQVSPPS#RAET#PEAFEM*SNFSR.S	O13332	-0.641113	0.00321225	Orf19.1945	3642617	AUR1	inositol phosphorylceramide synthase	Inositolphosphorylceramide (IPC) synthase; catalyzes the key step in sphingolipid biosynthesis; antifungal drug target; flow model biofilm induced; Spider biofilm induced
S27:S33	K.SPLSQS#PYISPS#PR.G	A0A1D8PF84	-0.569349	0.0211229	Orf19.1142	3645316	AVT4	Avt4p	Putative vacuolar transporter of large neutral amino acids; induced by alpha pheromone in SpiderM medium
S27:S31	K.SPLSQS#PYIS#PSPR.G	A0A1D8PF84	-0.439374	0.0343097	Orf19.1142	3645316	AVT4	Avt4p	Putative vacuolar transporter of large neutral amino acids; induced by alpha pheromone in SpiderM medium
S15	R.RRS#IALLTK.S	A0A1D8PF84	-0.368312	0.00452483	Orf19.1142	3645316	AVT4	Avt4p	Putative vacuolar transporter of large neutral amino acids; induced by alpha pheromone in SpiderM medium
S136	K.SRS#CDSIGGNSIK.S	A0A1D8PF84	0.219557	0.0155448	Orf19.1142	3645316	AVT4	Avt4p	Putative vacuolar transporter of large neutral amino acids; induced by alpha pheromone in SpiderM medium
S749	R.S#KVSDDEFNSSSRVK.Q	A0A1D8PM01	-0.524895	0.00324376	Orf19.5292	3641184	AXL2	Axl2p	Ortholog of S. cerevisiae Axl2; a plasma membrane protein involved in determination of budding pattern; O-glycosylated by Pmt4; mutant is viable
S596	R.ANTES#DSKLAR.I	A0A1D8PM01	0.427592	0.000136614	Orf19.5292	3641184	AXL2	Axl2p	Ortholog of S. cerevisiae Axl2; a plasma membrane protein involved in determination of budding pattern; O-glycosylated by Pmt4; mutant is viable
S752	R.SKVS#DDEFNSSSR.V	A0A1D8PM01	1.4752	0.00147551	Orf19.5292	3641184	AXL2	Axl2p	Ortholog of S. cerevisiae Axl2; a plasma membrane protein involved in determination of budding pattern; O-glycosylated by Pmt4; mutant is viable
T274	K.KLKRDPDLSSNT#PRPTSVNTPANEQSR.T	Q5A683	-1.86383	0.00113309	Orf19.3809	3641136	BAS1	Bas1p	Putative Myb-like transcription factor; ortholog S. cerevisiae Bas1, a regulator of purine biosynthetic genes; mutant exhibits adenine auxotrophy and abnormal colony morphology
S458	R.S#TTPAELDGTRESDLIKLLNNTDELNRR.E	Q5A683	-1.70846	0.0238552	Orf19.3809	3641136	BAS1	Bas1p	Putative Myb-like transcription factor; ortholog S. cerevisiae Bas1, a regulator of purine biosynthetic genes; mutant exhibits adenine auxotrophy and abnormal colony morphology
T629	R.ENT#PKPVLIQSQAR.K	Q5A683	0.47048	0.00428775	Orf19.3809	3641136	BAS1	Bas1p	Putative Myb-like transcription factor; ortholog S. cerevisiae Bas1, a regulator of purine biosynthetic genes; mutant exhibits adenine auxotrophy and abnormal colony morphology
T299	R.YTLT#PDGNK.Q	Q5A683	1.23597	0.0214194	Orf19.3809	3641136	BAS1	Bas1p	Putative Myb-like transcription factor; ortholog S. cerevisiae Bas1, a regulator of purine biosynthetic genes; mutant exhibits adenine auxotrophy and abnormal colony morphology
S450:S458	R.VSDLASSEFSHDSSS#IAEDDEES#DIDRR.Q	A0A1D8PE54	-3.81315	0.040902	Orf19.2791	3646661	BBC1	Bbc1p	Putative SH3-domain-containing protein
S450	R.VSDLASSEFSHDSSS#IAEDDEESDIDRR.Q	A0A1D8PE54	-2.97203	0.0081271	Orf19.2791	3646661	BBC1	Bbc1p	Putative SH3-domain-containing protein
S458	R.VSDLASSEFSHDSSSIAEDDEES#DIDRR.Q	A0A1D8PE54	-1.75306	0.0185321	Orf19.2791	3646661	BBC1	Bbc1p	Putative SH3-domain-containing protein
S698	R.AATDFPSLVSSNEEENAPTVRKSLDS#TVTR.S	A0A1D8PE54	-0.495575	0.00246633	Orf19.2791	3646661	BBC1	Bbc1p	Putative SH3-domain-containing protein
S113	K.SIEKPLGS#PTETVHSASK.A	A0A1D8PE54	-0.472447	0.00902438	Orf19.2791	3646661	BBC1	Bbc1p	Putative SH3-domain-containing protein
S682:S683	R.AATDFPSLVS#S#NEEENAPTVRK.S	A0A1D8PE54	-0.467146	0.0103081	Orf19.2791	3646661	BBC1	Bbc1p	Putative SH3-domain-containing protein
S695	R.AATDFPSLVSSNEEENAPTVRKS#LDSTVTR.S	A0A1D8PE54	-0.357421	0.0230476	Orf19.2791	3646661	BBC1	Bbc1p	Putative SH3-domain-containing protein
S466	R.QVS#SNVLENEIGTDK.T	A0A1D8PE54	2.29876	1.56783e-05	Orf19.2791	3646661	BBC1	Bbc1p	Putative SH3-domain-containing protein
S293	R.KSLGGGEIS#PINVKHENR.K	A0A1D8PR87	-0.360008	0.0219572	Orf19.5162	3641384	BCK1	mitogen-activated protein kinase kinase kinase	Ortholog of S. cerevisiae Bck1; MAP kinase kinase kinase of cell integrity pathway; mutant is hypersensitive to caspofungin
S447	K.SIKS#FSDDLSIDPK.Y	A0A1D8PR87	0.267462	0.0252794	Orf19.5162	3641384	BCK1	mitogen-activated protein kinase kinase kinase	Ortholog of S. cerevisiae Bck1; MAP kinase kinase kinase of cell integrity pathway; mutant is hypersensitive to caspofungin
S804	K.NISDSTDDNDS#EDAFFVKPLK.K	A0A1D8PR87	0.412117	0.0116368	Orf19.5162	3641384	BCK1	mitogen-activated protein kinase kinase kinase	Ortholog of S. cerevisiae Bck1; MAP kinase kinase kinase of cell integrity pathway; mutant is hypersensitive to caspofungin
S441	R.KISVDSELS#PK.S	A0A1D8PR87	0.42548	0.00416553	Orf19.5162	3641384	BCK1	mitogen-activated protein kinase kinase kinase	Ortholog of S. cerevisiae Bck1; MAP kinase kinase kinase of cell integrity pathway; mutant is hypersensitive to caspofungin
S304	K.S#TPIYTK.H	A0A1D8PR87	0.46133	0.0482483	Orf19.5162	3641384	BCK1	mitogen-activated protein kinase kinase kinase	Ortholog of S. cerevisiae Bck1; MAP kinase kinase kinase of cell integrity pathway; mutant is hypersensitive to caspofungin
S911	K.YFPYTNLDKPIIDDSPAS#PSPQR.R	A0A1D8PR87	0.579944	0.0124838	Orf19.5162	3641384	BCK1	mitogen-activated protein kinase kinase kinase	Ortholog of S. cerevisiae Bck1; MAP kinase kinase kinase of cell integrity pathway; mutant is hypersensitive to caspofungin
S293	R.KSLGGGEIS#PINVK.H	A0A1D8PR87	0.630835	5.40568e-05	Orf19.5162	3641384	BCK1	mitogen-activated protein kinase kinase kinase	Ortholog of S. cerevisiae Bck1; MAP kinase kinase kinase of cell integrity pathway; mutant is hypersensitive to caspofungin
S930	R.TFSSANKS#PVAPTSADSK.N	A0A1D8PR87	0.721244	0.0224785	Orf19.5162	3641384	BCK1	mitogen-activated protein kinase kinase kinase	Ortholog of S. cerevisiae Bck1; MAP kinase kinase kinase of cell integrity pathway; mutant is hypersensitive to caspofungin
S556:S559,S556:S559	R.QSS#VVS#DFSIFSNSDNRK.D	Q59U10	0.363172	0.0141656	Orf19.723	3645280	BCR1	Bcr1p	Transcription factor; regulates a/alpha biofilm formation, matrix, cell-surface-associated genes; confers adherence, impermeability, impenetrability, fluconazole resistance; Tup1/Tec1/Mnl1-regulated; mRNA binds She3; Spider biofilm induced
S559,S559	R.QSSVVS#DFSIFSNSDNRK.D	Q59U10	0.415493	0.000543459	Orf19.723	3645280	BCR1	Bcr1p	Transcription factor; regulates a/alpha biofilm formation, matrix, cell-surface-associated genes; confers adherence, impermeability, impenetrability, fluconazole resistance; Tup1/Tec1/Mnl1-regulated; mRNA binds She3; Spider biofilm induced
S556,S556	R.QSS#VVSDFSIFSNSDNRK.D	Q59U10	0.535979	0.00157545	Orf19.723	3645280	BCR1	Bcr1p	Transcription factor; regulates a/alpha biofilm formation, matrix, cell-surface-associated genes; confers adherence, impermeability, impenetrability, fluconazole resistance; Tup1/Tec1/Mnl1-regulated; mRNA binds She3; Spider biofilm induced
S84,S84	K.AEAAGIDLFPSVDHVNVNSSGVSIVNDRQPS#FK.S	Q9HEW1	-1.37949	0.0484586	Orf19.2015	3638832	BCY1	cAMP-dependent protein kinase regulatory subunit	#N/A
S180,S180	R.RTS#VSAEALNPAKLK.L	Q9HEW1	-0.627746	0.00562897	Orf19.2015	3638832	BCY1	cAMP-dependent protein kinase regulatory subunit	#N/A
T179,T179	R.RT#SVSAEALNPAKLK.L	Q9HEW1	-0.461381	5.67228e-05	Orf19.2015	3638832	BCY1	cAMP-dependent protein kinase regulatory subunit	#N/A
S180,S180	R.RTS#VSAEALNPAK.L	Q9HEW1	0.323903	0.00194565	Orf19.2015	3638832	BCY1	cAMP-dependent protein kinase regulatory subunit	#N/A
T179,T179	R.RT#SVSAEALNPAK.L	Q9HEW1	0.457477	0.00430043	Orf19.2015	3638832	BCY1	cAMP-dependent protein kinase regulatory subunit	#N/A
S182,S182	R.RTSVS#AEALNPAK.L	Q9HEW1	0.853984	0.0218062	Orf19.2015	3638832	BCY1	cAMP-dependent protein kinase regulatory subunit	#N/A
S706,S706	R.SQLALFDEGVNGQQGS#DNGFM*K.V	Q5A4W8	0.532736	0.000746095	Orf19.978	3641592	BDF1	chromatin-binding protein	Bromodomain transcription factor; repressed upon adherence to polystyrene; reduced mRNA abundance detected in null mutant; macrophage/pseudohyphal-repressed; possibly essential, disruptants not obtained by UAU1 method
S30	R.VSSTSS#NQTSHDGILQSPK.K	A0A1D8PLB6	-0.540801	3.87322e-05	Orf19.4645	3635627	BEM1	phosphatidylinositol-3-phosphate-binding protein	Protein required for wild-type budding, hyphal growth, and virulence in a mouse systemic infection; suppresses pseudohyphal and filamentous growth defects of various S. cerevisiae mutants and heat sensitivity of S. cerevisiae cdc24-4 mutant
S422	K.RFS#KPISQK.S	A0A1D8PLB6	-0.348741	0.0117351	Orf19.4645	3635627	BEM1	phosphatidylinositol-3-phosphate-binding protein	Protein required for wild-type budding, hyphal growth, and virulence in a mouse systemic infection; suppresses pseudohyphal and filamentous growth defects of various S. cerevisiae mutants and heat sensitivity of S. cerevisiae cdc24-4 mutant
S422:S426	K.RFS#KPIS#QK.S	A0A1D8PLB6	0.700926	0.00104088	Orf19.4645	3635627	BEM1	phosphatidylinositol-3-phosphate-binding protein	Protein required for wild-type budding, hyphal growth, and virulence in a mouse systemic infection; suppresses pseudohyphal and filamentous growth defects of various S. cerevisiae mutants and heat sensitivity of S. cerevisiae cdc24-4 mutant
S2220	R.KNNVIQSGVDPNDDGVHHLTKVVS#DDTTR.T	Q5AGW7	-1.71211	0.0222076	Orf19.6573	3637044	BEM2	Bem2p	Putative Rho1p GTPase activating protein (GAP); serum-induced transcript; Spider biofilm induced; flow model biofilm repressed
S850	R.QLENPPS#PIKRR.E	Q5AGW7	-0.193787	0.00930308	Orf19.6573	3637044	BEM2	Bem2p	Putative Rho1p GTPase activating protein (GAP); serum-induced transcript; Spider biofilm induced; flow model biofilm repressed
S1714	R.KTS#NTSLKR.Q	Q5AGW7	-0.105805	0.000586466	Orf19.6573	3637044	BEM2	Bem2p	Putative Rho1p GTPase activating protein (GAP); serum-induced transcript; Spider biofilm induced; flow model biofilm repressed
S330	R.KNS#TIETTTIPVNR.N	Q5AGW7	0.153515	0.00319271	Orf19.6573	3637044	BEM2	Bem2p	Putative Rho1p GTPase activating protein (GAP); serum-induced transcript; Spider biofilm induced; flow model biofilm repressed
S2220	K.VVS#DDTTRTDK.T	Q5AGW7	0.349683	0.021275	Orf19.6573	3637044	BEM2	Bem2p	Putative Rho1p GTPase activating protein (GAP); serum-induced transcript; Spider biofilm induced; flow model biofilm repressed
S977	K.KDS#PPLDPSVNK.H	Q5AGW7	0.673259	0.0136719	Orf19.6573	3637044	BEM2	Bem2p	Putative Rho1p GTPase activating protein (GAP); serum-induced transcript; Spider biofilm induced; flow model biofilm repressed
S850	R.QLENPPS#PIKR.R	Q5AGW7	0.693159	0.00174807	Orf19.6573	3637044	BEM2	Bem2p	Putative Rho1p GTPase activating protein (GAP); serum-induced transcript; Spider biofilm induced; flow model biofilm repressed
S850	R.QLENPPS#PIK.R	Q5AGW7	0.784567	0.000243192	Orf19.6573	3637044	BEM2	Bem2p	Putative Rho1p GTPase activating protein (GAP); serum-induced transcript; Spider biofilm induced; flow model biofilm repressed
S977	K.SGDKKDS#PPLDPSVNK.H	Q5AGW7	0.791212	0.00345193	Orf19.6573	3637044	BEM2	Bem2p	Putative Rho1p GTPase activating protein (GAP); serum-induced transcript; Spider biofilm induced; flow model biofilm repressed
S11	R.S#ISQDSRHEYPNSDTKLER.T	A0A1D8PLJ2	-1.07103	0.0165411	Orf19.2771	3637885	BEM3	Bem3p	Putative GTPase-activating protein (GAP) for Rho-type GTPase Cdc42p; involved in cell signaling pathways that control cell polarity; similar to S. cerevisiae Bem3p
S121:S134	K.RVS#AALSPTLVTIPKS#PQR.S	A0A1D8PLJ2	-0.893259	6.36374e-05	Orf19.2771	3637885	BEM3	Bem3p	Putative GTPase-activating protein (GAP) for Rho-type GTPase Cdc42p; involved in cell signaling pathways that control cell polarity; similar to S. cerevisiae Bem3p
S125:S134	K.RVSAALS#PTLVTIPKS#PQR.S	A0A1D8PLJ2	-0.379095	0.0200585	Orf19.2771	3637885	BEM3	Bem3p	Putative GTPase-activating protein (GAP) for Rho-type GTPase Cdc42p; involved in cell signaling pathways that control cell polarity; similar to S. cerevisiae Bem3p
T83	K.SSNGNKLTLDLINNRT#PPLSQK.S	A0A1D8PLJ2	-0.244185	0.00704381	Orf19.2771	3637885	BEM3	Bem3p	Putative GTPase-activating protein (GAP) for Rho-type GTPase Cdc42p; involved in cell signaling pathways that control cell polarity; similar to S. cerevisiae Bem3p
S341	R.S#SSSVGSTYK.S	A0A1D8PLJ2	0.114388	0.020722	Orf19.2771	3637885	BEM3	Bem3p	Putative GTPase-activating protein (GAP) for Rho-type GTPase Cdc42p; involved in cell signaling pathways that control cell polarity; similar to S. cerevisiae Bem3p
S125:S134	R.VSAALS#PTLVTIPKS#PQR.S	A0A1D8PLJ2	0.229348	0.021106	Orf19.2771	3637885	BEM3	Bem3p	Putative GTPase-activating protein (GAP) for Rho-type GTPase Cdc42p; involved in cell signaling pathways that control cell polarity; similar to S. cerevisiae Bem3p
S341:S343	R.S#SS#SVGSTYK.S	A0A1D8PLJ2	0.310413	0.0144868	Orf19.2771	3637885	BEM3	Bem3p	Putative GTPase-activating protein (GAP) for Rho-type GTPase Cdc42p; involved in cell signaling pathways that control cell polarity; similar to S. cerevisiae Bem3p
S134	R.VSAALSPTLVTIPKS#PQR.S	A0A1D8PLJ2	0.341802	0.0119583	Orf19.2771	3637885	BEM3	Bem3p	Putative GTPase-activating protein (GAP) for Rho-type GTPase Cdc42p; involved in cell signaling pathways that control cell polarity; similar to S. cerevisiae Bem3p
S239	R.ANEYASIKS#PDFEVDLGNITSK.S	A0A1D8PLJ2	0.513411	0.00176184	Orf19.2771	3637885	BEM3	Bem3p	Putative GTPase-activating protein (GAP) for Rho-type GTPase Cdc42p; involved in cell signaling pathways that control cell polarity; similar to S. cerevisiae Bem3p
S236:S239	R.ANEYAS#IKS#PDFEVDLGNITSK.S	A0A1D8PLJ2	0.555042	0.00445257	Orf19.2771	3637885	BEM3	Bem3p	Putative GTPase-activating protein (GAP) for Rho-type GTPase Cdc42p; involved in cell signaling pathways that control cell polarity; similar to S. cerevisiae Bem3p
T83	K.LTLDLINNRT#PPLSQK.S	A0A1D8PLJ2	1.48389	0.0014113	Orf19.2771	3637885	BEM3	Bem3p	Putative GTPase-activating protein (GAP) for Rho-type GTPase Cdc42p; involved in cell signaling pathways that control cell polarity; similar to S. cerevisiae Bem3p
S231	K.QKLDRIPS#FYNK.N	A0A1D8PC67	0.556021	0.00414852	Orf19.6080	3639301	BFA1	Bfa1p	Ortholog(s) have GDP-dissociation inhibitor activity, GTPase activator activity, role in mitotic spindle orientation checkpoint and Bfa1-Bub2 complex localization
S71	R.HM*VRRPS#FGTIVTTR.E	Q5A2T3	-3.72132	3.58637e-05	Orf19.2182	3642310	BLM3	Blm3p	Putative proteasome activator; binds core proteasome and stimulates proteasome-mediated protein degradation by inducing gate opening; ortholog of S. cerevisiae Blm10; transcript regulated by Nrg1 and Mig1
S2071	R.VSAAETLSGLIHIS#PVEEVEGLVEK.Y	Q5A2T3	-2.97149	0.000493017	Orf19.2182	3642310	BLM3	Blm3p	Putative proteasome activator; binds core proteasome and stimulates proteasome-mediated protein degradation by inducing gate opening; ortholog of S. cerevisiae Blm10; transcript regulated by Nrg1 and Mig1
S36	K.VAS#SDHLKQQIFEQDGPLR.S	Q5A2T3	-0.955768	0.00801197	Orf19.2182	3642310	BLM3	Blm3p	Putative proteasome activator; binds core proteasome and stimulates proteasome-mediated protein degradation by inducing gate opening; ortholog of S. cerevisiae Blm10; transcript regulated by Nrg1 and Mig1
S13	K.VDKS#PKANVSAPVPLK.H	Q5A2T3	-0.821098	0.00466748	Orf19.2182	3642310	BLM3	Blm3p	Putative proteasome activator; binds core proteasome and stimulates proteasome-mediated protein degradation by inducing gate opening; ortholog of S. cerevisiae Blm10; transcript regulated by Nrg1 and Mig1
S1143	R.GREKDDESIPSKPAS#PTQNPLAR.F	Q5A2T3	-0.383241	0.00567196	Orf19.2182	3642310	BLM3	Blm3p	Putative proteasome activator; binds core proteasome and stimulates proteasome-mediated protein degradation by inducing gate opening; ortholog of S. cerevisiae Blm10; transcript regulated by Nrg1 and Mig1
S1143	R.EKDDESIPSKPAS#PTQNPLAR.F	Q5A2T3	-0.317009	0.0187986	Orf19.2182	3642310	BLM3	Blm3p	Putative proteasome activator; binds core proteasome and stimulates proteasome-mediated protein degradation by inducing gate opening; ortholog of S. cerevisiae Blm10; transcript regulated by Nrg1 and Mig1
S1143	K.DDESIPSKPAS#PTQNPLAR.F	Q5A2T3	0.386226	0.0475935	Orf19.2182	3642310	BLM3	Blm3p	Putative proteasome activator; binds core proteasome and stimulates proteasome-mediated protein degradation by inducing gate opening; ortholog of S. cerevisiae Blm10; transcript regulated by Nrg1 and Mig1
S53	R.S#LTPNTM*GQVQR.H	Q5A2T3	0.408206	0.0131473	Orf19.2182	3642310	BLM3	Blm3p	Putative proteasome activator; binds core proteasome and stimulates proteasome-mediated protein degradation by inducing gate opening; ortholog of S. cerevisiae Blm10; transcript regulated by Nrg1 and Mig1
T55	R.SLT#PNTM*GQVQR.H	Q5A2T3	0.519439	0.0276456	Orf19.2182	3642310	BLM3	Blm3p	Putative proteasome activator; binds core proteasome and stimulates proteasome-mediated protein degradation by inducing gate opening; ortholog of S. cerevisiae Blm10; transcript regulated by Nrg1 and Mig1
S35,S35	R.ATS#VIEDFLHQENSELK.K	P0CT51	-4.94325	0.0206195	0	30515065	BLP1	Blp1p	#N/A
S35,S35	R.ATS#VIEDFLHQENSELKKSLK.N	P0CT51	-4.45886	0.00206645	0	30515065	BLP1	Blp1p	#N/A
T34,T34	R.AT#SVIEDFLHQENSELK.K	P0CT51	-3.57517	0.0138995	0	30515065	BLP1	Blp1p	#N/A
S8,S8	R.KLS#EVDADAAEDVKM*DM*GATIIPQRER.A	P0CT51	-1.20457	0.000698102	0	30515065	BLP1	Blp1p	#N/A
S35,S35	R.ATS#VIEDFLHQENSELKK.S	P0CT51	-0.820766	0.000517367	0	30515065	BLP1	Blp1p	#N/A
T34,T34	R.ERAT#SVIEDFLHQENSELKK.S	P0CT51	-0.800911	0.00701785	0	30515065	BLP1	Blp1p	#N/A
T34,T34	R.AT#SVIEDFLHQENSELKK.S	P0CT51	-0.738469	0.00314378	0	30515065	BLP1	Blp1p	#N/A
S35,S35	R.ERATS#VIEDFLHQENSELKK.S	P0CT51	-0.686975	0.00170644	0	30515065	BLP1	Blp1p	#N/A
S35,S35	R.ERATS#VIEDFLHQENSELK.K	P0CT51	-0.581939	0.00261015	0	30515065	BLP1	Blp1p	#N/A
S8,S8	R.KLS#EVDADAAEDVKM*DM*GATIIPQR.E	P0CT51	-0.272766	0.0249301	0	30515065	BLP1	Blp1p	#N/A
S211,S211	K.QAFDDAVADLETLS#EDSYK.D	O42766	0.294344	0.0189561	Orf19.3014	3636810	BMH1	14-3-3 family protein	Sole 14-3-3 protein in C. albicans; role in hyphal growth; possibly regulated by host interaction; localizes to yeast-form cell surface, not hyphae; alternatively spliced 5' UTR intron; Spider biofilm repressed
S47,S47	R.NLLS#VAYK.N	O42766	0.781219	0.0208862	Orf19.3014	3636810	BMH1	14-3-3 family protein	Sole 14-3-3 protein in C. albicans; role in hyphal growth; possibly regulated by host interaction; localizes to yeast-form cell surface, not hyphae; alternatively spliced 5' UTR intron; Spider biofilm repressed
S448	K.ALNQVDEDDNNEEEDDDDDEEGLLS#DEETIVDTGR.S	A0A1D8PJ43	-1.23092	0.0466314	Orf19.2504	3639857	BMS1	GTPase	Putative GTPase; Hap43-induced gene; mutation confers resistance to 5-fluorocytosine (5-FC); flucytosine induced; repressed by prostaglandins; Spider biofilm induced
S640	K.AKFNPNTIDENNS#DDEYENGYKILK.S	A0A1D8PJ43	-0.92587	0.00641598	Orf19.2504	3639857	BMS1	GTPase	Putative GTPase; Hap43-induced gene; mutation confers resistance to 5-fluorocytosine (5-FC); flucytosine induced; repressed by prostaglandins; Spider biofilm induced
T959,T959	K.IDAPDVVSNSPRT#QKR.A	Q5AL52	-2.46026	0.00469157	Orf19.4927	3636118	BNI1	formin	Formin; role in cytoskeletal organization, cell polarity; role in systemic virulence in mouse; cell-cycle regulated localization to site of polarized growth, bud neck; localizes to Spitzenkorper of hyphae, minor localization at septum
S954,S954	K.GQVKIDAPDVVS#NSPR.T	Q5AL52	-0.638355	0.0220872	Orf19.4927	3636118	BNI1	formin	Formin; role in cytoskeletal organization, cell polarity; role in systemic virulence in mouse; cell-cycle regulated localization to site of polarized growth, bud neck; localizes to Spitzenkorper of hyphae, minor localization at septum
S956,S956	K.GQVKIDAPDVVSNS#PR.T	Q5AL52	-0.60106	0.00721615	Orf19.4927	3636118	BNI1	formin	Formin; role in cytoskeletal organization, cell polarity; role in systemic virulence in mouse; cell-cycle regulated localization to site of polarized growth, bud neck; localizes to Spitzenkorper of hyphae, minor localization at septum
S1717:S1731,S1717:S1731	K.KKS#VQIDLDEVAKNNNS#E.-	Q5AL52	-0.454503	0.00520382	Orf19.4927	3636118	BNI1	formin	Formin; role in cytoskeletal organization, cell polarity; role in systemic virulence in mouse; cell-cycle regulated localization to site of polarized growth, bud neck; localizes to Spitzenkorper of hyphae, minor localization at septum
S1731,S1731	K.SVQIDLDEVAKNNNS#E.-	Q5AL52	-0.297829	0.0361088	Orf19.4927	3636118	BNI1	formin	Formin; role in cytoskeletal organization, cell polarity; role in systemic virulence in mouse; cell-cycle regulated localization to site of polarized growth, bud neck; localizes to Spitzenkorper of hyphae, minor localization at septum
S1005,S1005	K.VGKAEPIQDANNKNQFGGPLSS#SPEDVSQK.H	Q5AL52	0.292793	0.0233239	Orf19.4927	3636118	BNI1	formin	Formin; role in cytoskeletal organization, cell polarity; role in systemic virulence in mouse; cell-cycle regulated localization to site of polarized growth, bud neck; localizes to Spitzenkorper of hyphae, minor localization at septum
S85,S85	K.S#TNISISRPIK.T	Q5AL52	0.447293	0.00152339	Orf19.4927	3636118	BNI1	formin	Formin; role in cytoskeletal organization, cell polarity; role in systemic virulence in mouse; cell-cycle regulated localization to site of polarized growth, bud neck; localizes to Spitzenkorper of hyphae, minor localization at septum
S966,S966	R.S#TTLNAM*DPK.F	Q5AL52	0.486502	0.0121066	Orf19.4927	3636118	BNI1	formin	Formin; role in cytoskeletal organization, cell polarity; role in systemic virulence in mouse; cell-cycle regulated localization to site of polarized growth, bud neck; localizes to Spitzenkorper of hyphae, minor localization at septum
S340,S340	K.SRM*EFDSPDNYS#PR.K	Q5AL52	0.689082	0.0316323	Orf19.4927	3636118	BNI1	formin	Formin; role in cytoskeletal organization, cell polarity; role in systemic virulence in mouse; cell-cycle regulated localization to site of polarized growth, bud neck; localizes to Spitzenkorper of hyphae, minor localization at septum
S340,S340	R.M*EFDSPDNYS#PR.K	Q5AL52	0.695107	0.0128582	Orf19.4927	3636118	BNI1	formin	Formin; role in cytoskeletal organization, cell polarity; role in systemic virulence in mouse; cell-cycle regulated localization to site of polarized growth, bud neck; localizes to Spitzenkorper of hyphae, minor localization at septum
S549	R.KNS#NTTTSTDFHPENK.T	A0A1D8PD43	-0.779686	0.0380709	Orf19.4457	3646406	BNI4	Bni4p	Protein required for wild-type cell wall chitin distribution, morphology, hyphal growth; not essential; similar to S. cerevisiae Bni4p (targeting subunit for Glc7p phosphatase, involved in bud-neck localization of chitin synthase III)
S809	R.QGYKDVGNIHNNS#DDEEDDDNVDRLSNFK.S	A0A1D8PD43	-0.685732	0.00595693	Orf19.4457	3646406	BNI4	Bni4p	Protein required for wild-type cell wall chitin distribution, morphology, hyphal growth; not essential; similar to S. cerevisiae Bni4p (targeting subunit for Glc7p phosphatase, involved in bud-neck localization of chitin synthase III)
S1526	K.FTHNKIPSISDQSS#INSESSPR.S	A0A1D8PD43	-0.543634	0.00996299	Orf19.4457	3646406	BNI4	Bni4p	Protein required for wild-type cell wall chitin distribution, morphology, hyphal growth; not essential; similar to S. cerevisiae Bni4p (targeting subunit for Glc7p phosphatase, involved in bud-neck localization of chitin synthase III)
S923	R.EAQHTNTNDDDDNSS#PLQR.T	A0A1D8PD43	-0.534367	0.0168809	Orf19.4457	3646406	BNI4	Bni4p	Protein required for wild-type cell wall chitin distribution, morphology, hyphal growth; not essential; similar to S. cerevisiae Bni4p (targeting subunit for Glc7p phosphatase, involved in bud-neck localization of chitin synthase III)
S1525	K.FTHNKIPSISDQS#SINSESSPR.S	A0A1D8PD43	-0.41168	0.0357937	Orf19.4457	3646406	BNI4	Bni4p	Protein required for wild-type cell wall chitin distribution, morphology, hyphal growth; not essential; similar to S. cerevisiae Bni4p (targeting subunit for Glc7p phosphatase, involved in bud-neck localization of chitin synthase III)
S1307	K.ANNNDIIDDQVIIAS#PILESAYR.I	A0A1D8PD43	-0.178217	0.0476379	Orf19.4457	3646406	BNI4	Bni4p	Protein required for wild-type cell wall chitin distribution, morphology, hyphal growth; not essential; similar to S. cerevisiae Bni4p (targeting subunit for Glc7p phosphatase, involved in bud-neck localization of chitin synthase III)
S1563	R.KNNNYNPSNSPNSNSS#PK.F	A0A1D8PD43	0.317675	0.0248666	Orf19.4457	3646406	BNI4	Bni4p	Protein required for wild-type cell wall chitin distribution, morphology, hyphal growth; not essential; similar to S. cerevisiae Bni4p (targeting subunit for Glc7p phosphatase, involved in bud-neck localization of chitin synthase III)
S535	R.SNS#SYSIM*K.G	A0A1D8PD43	0.386072	0.00917489	Orf19.4457	3646406	BNI4	Bni4p	Protein required for wild-type cell wall chitin distribution, morphology, hyphal growth; not essential; similar to S. cerevisiae Bni4p (targeting subunit for Glc7p phosphatase, involved in bud-neck localization of chitin synthase III)
S1557	K.NNNYNPSNS#PNSNSSPK.F	A0A1D8PD43	0.429072	0.00510025	Orf19.4457	3646406	BNI4	Bni4p	Protein required for wild-type cell wall chitin distribution, morphology, hyphal growth; not essential; similar to S. cerevisiae Bni4p (targeting subunit for Glc7p phosphatase, involved in bud-neck localization of chitin synthase III)
S569	R.S#NTLNDFSKLNK.E	A0A1D8PD43	0.521987	0.0154939	Orf19.4457	3646406	BNI4	Bni4p	Protein required for wild-type cell wall chitin distribution, morphology, hyphal growth; not essential; similar to S. cerevisiae Bni4p (targeting subunit for Glc7p phosphatase, involved in bud-neck localization of chitin synthase III)
S1334	K.QNRPIS#M*SFK.G	A0A1D8PD43	0.529798	0.00741556	Orf19.4457	3646406	BNI4	Bni4p	Protein required for wild-type cell wall chitin distribution, morphology, hyphal growth; not essential; similar to S. cerevisiae Bni4p (targeting subunit for Glc7p phosphatase, involved in bud-neck localization of chitin synthase III)
S94	K.ASPS#LKALESILNEK.N	A0A1D8PD43	0.667534	5.3921e-05	Orf19.4457	3646406	BNI4	Bni4p	Protein required for wild-type cell wall chitin distribution, morphology, hyphal growth; not essential; similar to S. cerevisiae Bni4p (targeting subunit for Glc7p phosphatase, involved in bud-neck localization of chitin synthase III)
S1563	K.NNNYNPSNSPNSNSS#PK.F	A0A1D8PD43	0.768607	0.0142815	Orf19.4457	3646406	BNI4	Bni4p	Protein required for wild-type cell wall chitin distribution, morphology, hyphal growth; not essential; similar to S. cerevisiae Bni4p (targeting subunit for Glc7p phosphatase, involved in bud-neck localization of chitin synthase III)
S1557	R.KNNNYNPSNS#PNSNSSPK.F	A0A1D8PD43	0.771291	0.0136709	Orf19.4457	3646406	BNI4	Bni4p	Protein required for wild-type cell wall chitin distribution, morphology, hyphal growth; not essential; similar to S. cerevisiae Bni4p (targeting subunit for Glc7p phosphatase, involved in bud-neck localization of chitin synthase III)
S869	K.KLSS#GNKYGEEISLIPPLIDSNQFGSPFK.V	A0A1D8PD43	0.806441	0.0351919	Orf19.4457	3646406	BNI4	Bni4p	Protein required for wild-type cell wall chitin distribution, morphology, hyphal growth; not essential; similar to S. cerevisiae Bni4p (targeting subunit for Glc7p phosphatase, involved in bud-neck localization of chitin synthase III)
S759	K.FGLSAPPVNRNS#FNFIR.E	A0A1D8PD43	2.19336	0.0474807	Orf19.4457	3646406	BNI4	Bni4p	Protein required for wild-type cell wall chitin distribution, morphology, hyphal growth; not essential; similar to S. cerevisiae Bni4p (targeting subunit for Glc7p phosphatase, involved in bud-neck localization of chitin synthase III)
S1463,S1463	R.KRTTDGETS#PKSEQFM*SR.A	Q5AAF4	-0.881222	0.00103546	Orf19.7537	3639672	BNR1	Bnr1p	Formin; probable role in hyphal cytoskeletal polarity; synthetic lethality if Bnr1p and Bni1p are absent
S22,S22	R.S#KSLLNFAEQAKPPTPENFSSLDPK.S	Q5AAF4	-0.255156	0.0395845	Orf19.7537	3639672	BNR1	Bnr1p	Formin; probable role in hyphal cytoskeletal polarity; synthetic lethality if Bnr1p and Bni1p are absent
S537	R.RHS#SVFSYLSSGNDDSAKPTPK.L	A0A1D8PRW9	-2.88988	0.0474857	Orf19.3230	3640404	BOI2	Boi2p	Putative SH3-domain-containing protein; mutation confers hypersensitivity to toxic ergosterol analog; Spider biofilm induced
T601	R.ET#TSGQSSLHESGSK.S	A0A1D8PRW9	-2.58078	0.0260739	Orf19.3230	3640404	BOI2	Boi2p	Putative SH3-domain-containing protein; mutation confers hypersensitivity to toxic ergosterol analog; Spider biofilm induced
S460	R.RAPQPPSGESPIDTSYKFGAGSEYDRPPS#HYGM*YM*TR.T	A0A1D8PRW9	-2.23995	0.0402014	Orf19.3230	3640404	BOI2	Boi2p	Putative SH3-domain-containing protein; mutation confers hypersensitivity to toxic ergosterol analog; Spider biofilm induced
S537:S538	R.RHS#S#VFSYLSSGNDDSAKPTPK.L	A0A1D8PRW9	-1.97396	0.0189716	Orf19.3230	3640404	BOI2	Boi2p	Putative SH3-domain-containing protein; mutation confers hypersensitivity to toxic ergosterol analog; Spider biofilm induced
S411	R.KRSS#SVDVAPQQYLASDSTFM*SPR.R	A0A1D8PRW9	-1.63545	4.5357e-05	Orf19.3230	3640404	BOI2	Boi2p	Putative SH3-domain-containing protein; mutation confers hypersensitivity to toxic ergosterol analog; Spider biofilm induced
S410	R.KRS#SSVDVAPQQYLASDSTFM*SPR.R	A0A1D8PRW9	-1.28658	0.00670781	Orf19.3230	3640404	BOI2	Boi2p	Putative SH3-domain-containing protein; mutation confers hypersensitivity to toxic ergosterol analog; Spider biofilm induced
S162	R.ALQELQGS#NADLTNSGNSFNEHR.N	A0A1D8PRW9	-1.10456	0.0214343	Orf19.3230	3640404	BOI2	Boi2p	Putative SH3-domain-containing protein; mutation confers hypersensitivity to toxic ergosterol analog; Spider biofilm induced
S411:S412	R.KRSS#S#VDVAPQQYLASDSTFM*SPR.R	A0A1D8PRW9	-0.705966	0.00027904	Orf19.3230	3640404	BOI2	Boi2p	Putative SH3-domain-containing protein; mutation confers hypersensitivity to toxic ergosterol analog; Spider biofilm induced
S412	R.KRSSS#VDVAPQQYLASDSTFM*SPR.R	A0A1D8PRW9	-0.550061	0.00674466	Orf19.3230	3640404	BOI2	Boi2p	Putative SH3-domain-containing protein; mutation confers hypersensitivity to toxic ergosterol analog; Spider biofilm induced
S627	K.GKSQIFDLSNS#PVDIDDAKFSPK.K	A0A1D8PRW9	-0.283228	0.00930863	Orf19.3230	3640404	BOI2	Boi2p	Putative SH3-domain-containing protein; mutation confers hypersensitivity to toxic ergosterol analog; Spider biofilm induced
S619:S627	K.GKS#QIFDLSNS#PVDIDDAKFSPK.K	A0A1D8PRW9	-0.0837284	0.0477485	Orf19.3230	3640404	BOI2	Boi2p	Putative SH3-domain-containing protein; mutation confers hypersensitivity to toxic ergosterol analog; Spider biofilm induced
S627	K.SQIFDLSNS#PVDIDDAKFSPK.K	A0A1D8PRW9	0.195083	0.0399631	Orf19.3230	3640404	BOI2	Boi2p	Putative SH3-domain-containing protein; mutation confers hypersensitivity to toxic ergosterol analog; Spider biofilm induced
S637	K.GKSQIFDLSNSPVDIDDAKFS#PK.K	A0A1D8PRW9	0.482372	0.00857761	Orf19.3230	3640404	BOI2	Boi2p	Putative SH3-domain-containing protein; mutation confers hypersensitivity to toxic ergosterol analog; Spider biofilm induced
S627:S637	K.GKSQIFDLSNS#PVDIDDAKFS#PK.K	A0A1D8PRW9	0.549735	0.000864224	Orf19.3230	3640404	BOI2	Boi2p	Putative SH3-domain-containing protein; mutation confers hypersensitivity to toxic ergosterol analog; Spider biofilm induced
S239	K.SRQS#LTDDLDPLKANTWTPK.Q	A0A1D8PRW9	0.616278	0.00097856	Orf19.3230	3640404	BOI2	Boi2p	Putative SH3-domain-containing protein; mutation confers hypersensitivity to toxic ergosterol analog; Spider biofilm induced
S627:S637	K.SQIFDLSNS#PVDIDDAKFS#PK.K	A0A1D8PRW9	0.71285	0.00338081	Orf19.3230	3640404	BOI2	Boi2p	Putative SH3-domain-containing protein; mutation confers hypersensitivity to toxic ergosterol analog; Spider biofilm induced
S650	R.TKS#M*DAIGGNGDDR.R	A0A1D8PRW9	0.788437	0.000111882	Orf19.3230	3640404	BOI2	Boi2p	Putative SH3-domain-containing protein; mutation confers hypersensitivity to toxic ergosterol analog; Spider biofilm induced
S637	K.SQIFDLSNSPVDIDDAKFS#PK.K	A0A1D8PRW9	0.85777	0.000471576	Orf19.3230	3640404	BOI2	Boi2p	Putative SH3-domain-containing protein; mutation confers hypersensitivity to toxic ergosterol analog; Spider biofilm induced
S593	K.LVS#PAQIK.R	A0A1D8PRW9	0.904844	0.0312023	Orf19.3230	3640404	BOI2	Boi2p	Putative SH3-domain-containing protein; mutation confers hypersensitivity to toxic ergosterol analog; Spider biofilm induced
S990	R.SSSQSGGFASPYLLASGLLS#PK.S	A0A1D8PRW9	0.98594	0.00135352	Orf19.3230	3640404	BOI2	Boi2p	Putative SH3-domain-containing protein; mutation confers hypersensitivity to toxic ergosterol analog; Spider biofilm induced
T1131	K.SSSSPT#TTTGTSSTSGK.K	A0A1D8PRW9	1.069	0.0243607	Orf19.3230	3640404	BOI2	Boi2p	Putative SH3-domain-containing protein; mutation confers hypersensitivity to toxic ergosterol analog; Spider biofilm induced
S239	K.SRQS#LTDDLDPLK.A	A0A1D8PRW9	1.11333	0.00169797	Orf19.3230	3640404	BOI2	Boi2p	Putative SH3-domain-containing protein; mutation confers hypersensitivity to toxic ergosterol analog; Spider biofilm induced
S932:T936	K.LLHS#NPST#PIK.S	A0A1D8PDU1	0.592194	0.00267879	Orf19.6261	3639547	BPH1	Bph1p	Ortholog of S. cerevisiae Bph1; a putative ortholog of human Chediak-Higashi syndrome protein and murine beige gene implicated in disease syndromes involving defective lysosomal trafficking; mutant is viable
T11,T11	K.RST#PDSLNSPHAK.K	Q5A4X0	-2.28947	0.00500276	Orf19.976	3641568	BRE1	E3 ubiquitin-protein ligase	Putative transcription factor with C3HC4 zinc finger DNA-binding motif; similar to S. cerevisiae Bre1p; transposon mutation affects filamentous growth
S10,S10	K.KRS#TPDSLNSPHAK.K	Q5A4X0	-2.26097	0.003916	Orf19.976	3641568	BRE1	E3 ubiquitin-protein ligase	Putative transcription factor with C3HC4 zinc finger DNA-binding motif; similar to S. cerevisiae Bre1p; transposon mutation affects filamentous growth
T11,T11	K.RST#PDSLNSPHAKK.S	Q5A4X0	-2.24505	0.0144498	Orf19.976	3641568	BRE1	E3 ubiquitin-protein ligase	Putative transcription factor with C3HC4 zinc finger DNA-binding motif; similar to S. cerevisiae Bre1p; transposon mutation affects filamentous growth
T11,T11	K.KRST#PDSLNSPHAK.K	Q5A4X0	-2.17097	0.00981027	Orf19.976	3641568	BRE1	E3 ubiquitin-protein ligase	Putative transcription factor with C3HC4 zinc finger DNA-binding motif; similar to S. cerevisiae Bre1p; transposon mutation affects filamentous growth
S10:S17,S10:S17	K.RS#TPDSLNS#PHAKK.S	Q5A4X0	-1.05892	0.00682657	Orf19.976	3641568	BRE1	E3 ubiquitin-protein ligase	Putative transcription factor with C3HC4 zinc finger DNA-binding motif; similar to S. cerevisiae Bre1p; transposon mutation affects filamentous growth
S10,S10	R.S#TPDSLNSPHAK.K	Q5A4X0	-1.01906	0.00424729	Orf19.976	3641568	BRE1	E3 ubiquitin-protein ligase	Putative transcription factor with C3HC4 zinc finger DNA-binding motif; similar to S. cerevisiae Bre1p; transposon mutation affects filamentous growth
S14,S14	R.STPDS#LNSPHAKK.S	Q5A4X0	-0.643128	0.0327535	Orf19.976	3641568	BRE1	E3 ubiquitin-protein ligase	Putative transcription factor with C3HC4 zinc finger DNA-binding motif; similar to S. cerevisiae Bre1p; transposon mutation affects filamentous growth
T408,T408	K.RVESLTEERLEAIVGT#PGTGK.L	Q5A4X0	-0.598262	0.0154176	Orf19.976	3641568	BRE1	E3 ubiquitin-protein ligase	Putative transcription factor with C3HC4 zinc finger DNA-binding motif; similar to S. cerevisiae Bre1p; transposon mutation affects filamentous growth
T11:S17,T11:S17	K.RST#PDSLNS#PHAKK.S	Q5A4X0	-0.541529	0.0403898	Orf19.976	3641568	BRE1	E3 ubiquitin-protein ligase	Putative transcription factor with C3HC4 zinc finger DNA-binding motif; similar to S. cerevisiae Bre1p; transposon mutation affects filamentous growth
T11:S17,T11:S17	K.KRST#PDSLNS#PHAK.K	Q5A4X0	-0.523461	0.0398517	Orf19.976	3641568	BRE1	E3 ubiquitin-protein ligase	Putative transcription factor with C3HC4 zinc finger DNA-binding motif; similar to S. cerevisiae Bre1p; transposon mutation affects filamentous growth
T11:S17,T11:S17	K.RST#PDSLNS#PHAK.K	Q5A4X0	-0.468232	0.0119954	Orf19.976	3641568	BRE1	E3 ubiquitin-protein ligase	Putative transcription factor with C3HC4 zinc finger DNA-binding motif; similar to S. cerevisiae Bre1p; transposon mutation affects filamentous growth
S281,S281	K.LHNLEES#DLEDNTYYK.K	Q5A4X0	-0.340939	0.0239358	Orf19.976	3641568	BRE1	E3 ubiquitin-protein ligase	Putative transcription factor with C3HC4 zinc finger DNA-binding motif; similar to S. cerevisiae Bre1p; transposon mutation affects filamentous growth
S120	R.LSS#PTLPAK.V	Q59LY1	0.753971	0.00151788	Orf19.4056	3647664	BRG1	Brg1p	Transcription factor; recruits Hda1 to hypha-specific promoters; Tn mutation affects filamentation; Hap43-repressed; Spider and flow model biofilm induced; required for Spider biofilm formation; Bcr1-repressed in RPMI a/a biofilms
S26,S26	R.IRLPS#ISELTSR.S	Q59LY1	0.833921	0.0401399	Orf19.4056	3647664	BRG1	Brg1p	Transcription factor; recruits Hda1 to hypha-specific promoters; Tn mutation affects filamentation; Hap43-repressed; Spider and flow model biofilm induced; required for Spider biofilm formation; Bcr1-repressed in RPMI a/a biofilms
S119	R.LSS#PTLPVK.V	A0A1D8PDH2	0.914198	0.00497329	Orf19.4056	3647664	BRG1	Brg1p	Transcription factor; recruits Hda1 to hypha-specific promoters; Tn mutation affects filamentation; Hap43-repressed; Spider and flow model biofilm induced; required for Spider biofilm formation; Bcr1-repressed in RPMI a/a biofilms
S673	K.NQLADQKEDS#PDKEEEEEVAEK.Q	A0A1D8PMC8	0.846431	0.0126464	Orf19.1251	3641815	BRN1	condensin subunit	Putative condensin complex subunit; cell-cycle regulated periodic mRNA expression
S229	K.RGSS#VEPGAHVDHGPIAK.K	A0A1D8PLR1	-0.429447	0.0119263	Orf19.2678	3637922	BUB1	protein kinase	Putative cell cycle checkpoint kinase; mutation confers increased sensitivity to nocodazole
S348	R.RRLS#ESENSKTPSR.V	Q59QR8	-0.671137	0.000736676	Orf19.2655	3646362	BUB3	Bub3p	Protein similar to S. cerevisiae Bub3; a kinetochore checkpoint component; induced by hydroxyurea treatment; flow model biofilm induced; Spider biofilm induced
S131	R.KNS#LNISK.S	A0A1D8PHB1	0.135954	0.0498634	Orf19.3555	3643469	BUD14	protein phosphatase regulator	Putative SH3-domain-containing protein; predicted role in bud-site selection; Spider biofilm induced
S363:S366	K.KSPTPSSLQES#TDS#FKNQR.Q	A0A1D8PHB1	0.574231	0.0301218	Orf19.3555	3643469	BUD14	protein phosphatase regulator	Putative SH3-domain-containing protein; predicted role in bud-site selection; Spider biofilm induced
S973,S973	K.NIGNNNNGS#M*SNLGTPVNSPSRDM*EREQDRSR.S	Q5A506	-0.731793	0.0147475	Orf19.940	3641541	BUD2	Bud2p	GTPase activating protein (GAP) for Rsr1; negative regulator of filament branching, acts in hyphal growth guidance; required for wild-type budding pattern; induced in low iron; regulated by tyrosol and cell density
S997:T1003,S997:T1003	R.S#RSQSGT#PDLDPILNLSDLK.L	Q5A506	0.0968681	0.0486135	Orf19.940	3641541	BUD2	Bud2p	GTPase activating protein (GAP) for Rsr1; negative regulator of filament branching, acts in hyphal growth guidance; required for wild-type budding pattern; induced in low iron; regulated by tyrosol and cell density
S999:T1003,S999:T1003	R.SRS#QSGT#PDLDPILNLSDLK.L	Q5A506	0.198879	0.0129256	Orf19.940	3641541	BUD2	Bud2p	GTPase activating protein (GAP) for Rsr1; negative regulator of filament branching, acts in hyphal growth guidance; required for wild-type budding pattern; induced in low iron; regulated by tyrosol and cell density
S973,S973	K.NIGNNNNGS#M*SNLGTPVNSPSR.D	Q5A506	0.25533	0.042585	Orf19.940	3641541	BUD2	Bud2p	GTPase activating protein (GAP) for Rsr1; negative regulator of filament branching, acts in hyphal growth guidance; required for wild-type budding pattern; induced in low iron; regulated by tyrosol and cell density
S999,S999	R.SRS#QSGTPDLDPILNLSDLK.L	Q5A506	0.471365	0.00367163	Orf19.940	3641541	BUD2	Bud2p	GTPase activating protein (GAP) for Rsr1; negative regulator of filament branching, acts in hyphal growth guidance; required for wild-type budding pattern; induced in low iron; regulated by tyrosol and cell density
S1013,S1013	R.SQSGTPDLDPILNLS#DLK.L	Q5A506	0.604123	0.00432763	Orf19.940	3641541	BUD2	Bud2p	GTPase activating protein (GAP) for Rsr1; negative regulator of filament branching, acts in hyphal growth guidance; required for wild-type budding pattern; induced in low iron; regulated by tyrosol and cell density
S155	R.HIRLDEIEAS#PK.L	Q5A7N6	0.522816	0.00183478	Orf19.5430	3640541	BUD21	Bud21p	Small-subunit processome component; repressed by prostaglandins
S24	K.KFTDDDFS#DEEK.V	Q5A7N6	0.731069	0.000187583	Orf19.5430	3640541	BUD21	Bud21p	Small-subunit processome component; repressed by prostaglandins
S24	K.FTDDDFS#DEEK.V	Q5A7N6	0.883157	0.00529134	Orf19.5430	3640541	BUD21	Bud21p	Small-subunit processome component; repressed by prostaglandins
S167:S169	R.NAPS#FS#SINESIFHNSSK.N	A0A1D8PTC8	-1.84056	0.0131428	Orf19.1842	3647315	BUD5	Ras family guanine nucleotide exchange factor	Predicted GTP/GDP exchange factor for Rsr1; rat catheter biofilm induced
T1152	R.KT#GSILGDEINR.Y	A0A1D8PTC8	0.277923	0.0230415	Orf19.1842	3647315	BUD5	Ras family guanine nucleotide exchange factor	Predicted GTP/GDP exchange factor for Rsr1; rat catheter biofilm induced
S242	K.IKPM*ES#PEVR.H	A0A1D8PE85	-0.319139	0.0094557	Orf19.5087	3640727	BUD6	Bud6p	Protein required for Spitzenkorper formation in hyphal cells (wild-type localization of Mlc1p to the Spitzenkorper); localizes to polarisome
S32	K.RRS#LNTIESSVTR.L	A0A1D8PE85	0.365278	0.042474	Orf19.5087	3640727	BUD6	Bud6p	Protein required for Spitzenkorper formation in hyphal cells (wild-type localization of Mlc1p to the Spitzenkorper); localizes to polarisome
S217	K.RFS#AYQYAK.L	A0A1D8PE85	0.503396	0.0116149	Orf19.5087	3640727	BUD6	Bud6p	Protein required for Spitzenkorper formation in hyphal cells (wild-type localization of Mlc1p to the Spitzenkorper); localizes to polarisome
S517	R.VLEQDSNDTNVDS#PSSKIAKVE.-	Q5AG95	-0.67845	9.21788e-06	Orf19.4284	3637772	BUR2	Bur2p	Protein with similarity to S. cerevisiae Bur2p, contains a cyclin domain; not required for wild-type hyphal growth, adherence to buccal epithelial cells, or virulence in mouse systemic infection
S379	R.SATPRS#GNSTPRPNK.S	Q5AB84	-2.83136	0.00422005	Orf19.6090	3639341	CAALFM_C100160CA	hypothetical protein	Putative nucleolar protein with a predicted role in pre-rRNA processing and ribosome biogenesis; repressed by nitric oxide; required for flow model biofilm formation; Spider biofilm repressed
S379	R.S#GNSTPRPNKSTEFKGTK.K	Q5AB84	-1.85956	0.000734485	Orf19.6090	3639341	CAALFM_C100160CA	hypothetical protein	Putative nucleolar protein with a predicted role in pre-rRNA processing and ribosome biogenesis; repressed by nitric oxide; required for flow model biofilm formation; Spider biofilm repressed
S379:T383	R.S#GNST#PRPNKSTEFKGTK.K	Q5AB84	-0.994187	9.98491e-05	Orf19.6090	3639341	CAALFM_C100160CA	hypothetical protein	Putative nucleolar protein with a predicted role in pre-rRNA processing and ribosome biogenesis; repressed by nitric oxide; required for flow model biofilm formation; Spider biofilm repressed
S374:S382:T383	R.S#ATPRSGNS#T#PRPNKSTEFK.G	Q5AB84	-0.233253	0.0331319	Orf19.6090	3639341	CAALFM_C100160CA	hypothetical protein	Putative nucleolar protein with a predicted role in pre-rRNA processing and ribosome biogenesis; repressed by nitric oxide; required for flow model biofilm formation; Spider biofilm repressed
S147	K.AEES#KEEESAPVKK.S	Q5AB84	0.145658	0.0497465	Orf19.6090	3639341	CAALFM_C100160CA	hypothetical protein	Putative nucleolar protein with a predicted role in pre-rRNA processing and ribosome biogenesis; repressed by nitric oxide; required for flow model biofilm formation; Spider biofilm repressed
S420,S420	R.KLSQGSTNSYTSVNSEDVQS#NSPKTEPLIDQNRLSM*AR.I	Q5ABA6	-1.53859	0.0123355	Orf19.6064	3639285	CAALFM_C100430WA	phosphoinositide binding protein	Ortholog(s) have phosphatidylinositol-3,5-bisphosphate binding, ubiquitin binding activity
S378,S378	K.RNSEEFEDIRDDGDDS#DVDDEDGDIDDESLEVIPAK.Q	Q5ABA6	-0.546517	0.0267308	Orf19.6064	3639285	CAALFM_C100430WA	phosphoinositide binding protein	Ortholog(s) have phosphatidylinositol-3,5-bisphosphate binding, ubiquitin binding activity
S352,S352	K.KIPAVATILEEETEGS#QSNEQTK.S	Q5ABA6	-0.265974	0.0261924	Orf19.6064	3639285	CAALFM_C100430WA	phosphoinositide binding protein	Ortholog(s) have phosphatidylinositol-3,5-bisphosphate binding, ubiquitin binding activity
S30,S30	K.QYANSFSNDGS#SFSSK.N	Q5ABA6	1.14884	0.00117917	Orf19.6064	3639285	CAALFM_C100430WA	phosphoinositide binding protein	Ortholog(s) have phosphatidylinositol-3,5-bisphosphate binding, ubiquitin binding activity
S510	R.AALQEGAASTHANSPLLTPTSS#SAQLAK.M	Q5ABB5	-2.42871	0.0417042	Orf19.6055	3639368	CAALFM_C100530CA	hypothetical protein	Ortholog of C. dubliniensis CD36 : Cd36_00460, C. parapsilosis CDC317 : CPAR2_800010, Candida tenuis NRRL Y-1498 : CANTEDRAFT_125085 and Debaryomyces hansenii CBS767 : DEHA2D09086g
T58	K.NLT#PSVEDLR.T	Q5ABB5	-0.355287	0.0245195	Orf19.6055	3639368	CAALFM_C100530CA	hypothetical protein	Ortholog of C. dubliniensis CD36 : Cd36_00460, C. parapsilosis CDC317 : CPAR2_800010, Candida tenuis NRRL Y-1498 : CANTEDRAFT_125085 and Debaryomyces hansenii CBS767 : DEHA2D09086g
S60	K.NLTPS#VEDLR.T	Q5ABB5	0.464236	0.0167197	Orf19.6055	3639368	CAALFM_C100530CA	hypothetical protein	Ortholog of C. dubliniensis CD36 : Cd36_00460, C. parapsilosis CDC317 : CPAR2_800010, Candida tenuis NRRL Y-1498 : CANTEDRAFT_125085 and Debaryomyces hansenii CBS767 : DEHA2D09086g
T694:S699	R.VGNNVLPVT#PTRIS#PR.N	A0A1D8PC90	0.0619609	0.0259566	Orf19.6049	3639362	CAALFM_C100570CA	hypothetical protein	Ortholog(s) have protein kinase activator activity, role in protein phosphorylation, regulation of cytokinesis and chromosome passenger complex, kinetochore microtubule, spindle midzone localization
S708	R.NLPEIDS#DEEGDFSKK.K	A0A1D8PC90	0.199492	0.0123243	Orf19.6049	3639362	CAALFM_C100570CA	hypothetical protein	Ortholog(s) have protein kinase activator activity, role in protein phosphorylation, regulation of cytokinesis and chromosome passenger complex, kinetochore microtubule, spindle midzone localization
S203	R.VGDTIFKQDLS#GSDLLPNR.S	A0A1D8PC90	0.437733	0.0119432	Orf19.6049	3639362	CAALFM_C100570CA	hypothetical protein	Ortholog(s) have protein kinase activator activity, role in protein phosphorylation, regulation of cytokinesis and chromosome passenger complex, kinetochore microtubule, spindle midzone localization
S544	K.EVS#PIKLK.S	A0A1D8PC90	0.445053	0.00533994	Orf19.6049	3639362	CAALFM_C100570CA	hypothetical protein	Ortholog(s) have protein kinase activator activity, role in protein phosphorylation, regulation of cytokinesis and chromosome passenger complex, kinetochore microtubule, spindle midzone localization
S419	R.SLS#PVRKPLFNSK.T	A0A1D8PC90	0.448307	0.00769018	Orf19.6049	3639362	CAALFM_C100570CA	hypothetical protein	Ortholog(s) have protein kinase activator activity, role in protein phosphorylation, regulation of cytokinesis and chromosome passenger complex, kinetochore microtubule, spindle midzone localization
T479	R.GNSPT#SPSKLTANGGESDLINR.L	A0A1D8PC90	0.665433	0.0022438	Orf19.6049	3639362	CAALFM_C100570CA	hypothetical protein	Ortholog(s) have protein kinase activator activity, role in protein phosphorylation, regulation of cytokinesis and chromosome passenger complex, kinetochore microtubule, spindle midzone localization
S544	K.AKEVS#PIKLK.S	A0A1D8PC90	0.671491	0.00181813	Orf19.6049	3639362	CAALFM_C100570CA	hypothetical protein	Ortholog(s) have protein kinase activator activity, role in protein phosphorylation, regulation of cytokinesis and chromosome passenger complex, kinetochore microtubule, spindle midzone localization
S417:S419	K.YRS#LS#PVRKPLFNSK.T	A0A1D8PC90	0.716877	7.18388e-05	Orf19.6049	3639362	CAALFM_C100570CA	hypothetical protein	Ortholog(s) have protein kinase activator activity, role in protein phosphorylation, regulation of cytokinesis and chromosome passenger complex, kinetochore microtubule, spindle midzone localization
S33	K.HVNNS#PALSTPKK.S	Q5ABD1	-0.384346	0.00021625	Orf19.6039	3639376	CAALFM_C100660CA	t-SNARE syntaxin	Ortholog(s) have SNAP receptor activity and role in ER to Golgi vesicle-mediated transport, Golgi organization, intra-Golgi vesicle-mediated transport, vesicle fusion with Golgi apparatus
S22	R.RSS#KCSEIDENEIVSYVQQR.R	A0A1D8PCB5	-0.57803	0.00188054	Orf19.6023	3639344	CAALFM_C100830WA	hypothetical protein	Protein with a predicted multidrug transporter domain; Hap43-repressed gene
S92:S95	R.SIS#RSS#LISGK.S	A0A1D8PCB5	-0.173033	0.0278664	Orf19.6023	3639344	CAALFM_C100830WA	hypothetical protein	Protein with a predicted multidrug transporter domain; Hap43-repressed gene
S79	R.SS#M*VFDQK.I	Q5ABF8	0.882518	0.00351936	Orf19.6012	3639283	CAALFM_C100920WA	hypothetical protein	Ortholog(s) have cell division site, cell tip, cytosol localization
S74	K.QTTRPS#SNRSSM*VFDQK.I	Q5ABF8	0.928575	0.00343734	Orf19.6012	3639283	CAALFM_C100920WA	hypothetical protein	Ortholog(s) have cell division site, cell tip, cytosol localization
T72	K.T#ASKIELFVK.D	A0A1D8PCD8	0.851428	2.29821e-06	Orf19.3293	3640170	CAALFM_C101050CA	trans-2-enoyl-CoA reductase (NADPH)	Putative enoyl reductase involved in very long chain fatty acid elongation; possibly an essential gene, disruptants not obtained by UAU1 method
S152	R.SPLGNGYNS#DDYIEQVSR.E	A0A1D8PCF1	-1.0699	0.0123696	Orf19.3295	3640172	CAALFM_C101070CA	hypothetical protein	Has domain(s) with predicted role in cell division, chromosome segregation and MIS12/MIND type complex localization
T27:T34	K.LVHDT#DDDEQAT#PQPSLLSR.K	A0A1D8PCF1	-0.807948	0.00758081	Orf19.3295	3640172	CAALFM_C101070CA	hypothetical protein	Has domain(s) with predicted role in cell division, chromosome segregation and MIS12/MIND type complex localization
S47	R.KNQLS#DLFSSQENFTK.N	A0A1D8PCF1	-0.643353	0.0170765	Orf19.3295	3640172	CAALFM_C101070CA	hypothetical protein	Has domain(s) with predicted role in cell division, chromosome segregation and MIS12/MIND type complex localization
T34	K.LVHDTDDDEQAT#PQPSLLSR.K	A0A1D8PCF1	-0.588429	0.0251771	Orf19.3295	3640172	CAALFM_C101070CA	hypothetical protein	Has domain(s) with predicted role in cell division, chromosome segregation and MIS12/MIND type complex localization
T27	K.LVHDT#DDDEQATPQPSLLSR.K	A0A1D8PCF1	-0.383545	0.0145876	Orf19.3295	3640172	CAALFM_C101070CA	hypothetical protein	Has domain(s) with predicted role in cell division, chromosome segregation and MIS12/MIND type complex localization
S189	K.RVS#SIGNGFVGVPHK.E	A0A1D8PCF1	1.19734	0.000915026	Orf19.3295	3640172	CAALFM_C101070CA	hypothetical protein	Has domain(s) with predicted role in cell division, chromosome segregation and MIS12/MIND type complex localization
S428	R.VASDS#AIATTM*NSK.S	Q5A932	-1.63539	0.000721314	Orf19.3302	3640202	CAALFM_C101140CA	hypothetical protein	Putative type-1 protein phosphatase targeting subunit; transcript repressed by yeast-hyphal switch; transcript induced by Mnl1p under weak acid stress; flow model biofilm induced
T335	K.FSTNSST#DSLDASSNEDDGTSTHER.T	Q5A932	-1.46445	0.00602038	Orf19.3302	3640202	CAALFM_C101140CA	hypothetical protein	Putative type-1 protein phosphatase targeting subunit; transcript repressed by yeast-hyphal switch; transcript induced by Mnl1p under weak acid stress; flow model biofilm induced
S99	R.KKS#GELVKPSLK.S	Q5A932	-0.426601	0.0055384	Orf19.3302	3640202	CAALFM_C101140CA	hypothetical protein	Putative type-1 protein phosphatase targeting subunit; transcript repressed by yeast-hyphal switch; transcript induced by Mnl1p under weak acid stress; flow model biofilm induced
S120	R.SLS#LPSTPTYK.Q	Q5A932	-0.408372	0.000567091	Orf19.3302	3640202	CAALFM_C101140CA	hypothetical protein	Putative type-1 protein phosphatase targeting subunit; transcript repressed by yeast-hyphal switch; transcript induced by Mnl1p under weak acid stress; flow model biofilm induced
S426	R.VAS#DSAIATTM*NSK.S	Q5A932	-0.404335	0.0165325	Orf19.3302	3640202	CAALFM_C101140CA	hypothetical protein	Putative type-1 protein phosphatase targeting subunit; transcript repressed by yeast-hyphal switch; transcript induced by Mnl1p under weak acid stress; flow model biofilm induced
S118	R.S#LSLPSTPTYK.Q	Q5A932	-0.354874	0.000219549	Orf19.3302	3640202	CAALFM_C101140CA	hypothetical protein	Putative type-1 protein phosphatase targeting subunit; transcript repressed by yeast-hyphal switch; transcript induced by Mnl1p under weak acid stress; flow model biofilm induced
S120:T124	R.SLS#LPST#PTYK.Q	Q5A932	-0.259494	0.00959696	Orf19.3302	3640202	CAALFM_C101140CA	hypothetical protein	Putative type-1 protein phosphatase targeting subunit; transcript repressed by yeast-hyphal switch; transcript induced by Mnl1p under weak acid stress; flow model biofilm induced
S120:S123	R.SLS#LPS#TPTYK.Q	Q5A932	-0.213986	0.0395542	Orf19.3302	3640202	CAALFM_C101140CA	hypothetical protein	Putative type-1 protein phosphatase targeting subunit; transcript repressed by yeast-hyphal switch; transcript induced by Mnl1p under weak acid stress; flow model biofilm induced
S155	K.KDRPAAISASNS#PK.L	Q5A932	0.278856	0.044093	Orf19.3302	3640202	CAALFM_C101140CA	hypothetical protein	Putative type-1 protein phosphatase targeting subunit; transcript repressed by yeast-hyphal switch; transcript induced by Mnl1p under weak acid stress; flow model biofilm induced
S99	K.S#GELVKPSLK.S	Q5A932	0.555158	0.0375697	Orf19.3302	3640202	CAALFM_C101140CA	hypothetical protein	Putative type-1 protein phosphatase targeting subunit; transcript repressed by yeast-hyphal switch; transcript induced by Mnl1p under weak acid stress; flow model biofilm induced
S151:S155	K.DRPAAIS#ASNS#PK.L	Q5A932	0.602875	0.0325942	Orf19.3302	3640202	CAALFM_C101140CA	hypothetical protein	Putative type-1 protein phosphatase targeting subunit; transcript repressed by yeast-hyphal switch; transcript induced by Mnl1p under weak acid stress; flow model biofilm induced
S155	K.DRPAAISASNS#PK.L	Q5A932	0.632224	0.0046762	Orf19.3302	3640202	CAALFM_C101140CA	hypothetical protein	Putative type-1 protein phosphatase targeting subunit; transcript repressed by yeast-hyphal switch; transcript induced by Mnl1p under weak acid stress; flow model biofilm induced
S63	R.VQLEDVSSS#QIQHR.V	Q5A924	-0.709802	0.0420175	Orf19.3310	3640210	CAALFM_C101220CA	hypothetical protein	Protein of unknown function; Hap43-repressed; rat catheter and Spider biofilm induced
S153	R.NSTTSCLS#TTATKDGIEGR.R	Q5A924	0.230655	0.0199268	Orf19.3310	3640210	CAALFM_C101220CA	hypothetical protein	Protein of unknown function; Hap43-repressed; rat catheter and Spider biofilm induced
S147	R.NS#TTSCLSTTATK.D	Q5A924	0.623216	0.0141137	Orf19.3310	3640210	CAALFM_C101220CA	hypothetical protein	Protein of unknown function; Hap43-repressed; rat catheter and Spider biofilm induced
S298	R.KGLSLRSPANSS#PNPTSHYVFDVGPFASR.N	A0A1D8PCG5	-2.64164	0.00539213	Orf19.3328	3640236	CAALFM_C101390CA	hypothetical protein	Putative transcription factor; S. cerevisiae ortholog Hot1 is required for the transient induction of glycerol biosynthetic genes GPD1 and GPP2 in response to high osmolarity; filament induced
T352	K.NSQEDT#PANEPESTLQSQR.R	A0A1D8PCG5	-1.55495	0.0040042	Orf19.3328	3640236	CAALFM_C101390CA	hypothetical protein	Putative transcription factor; S. cerevisiae ortholog Hot1 is required for the transient induction of glycerol biosynthetic genes GPD1 and GPP2 in response to high osmolarity; filament induced
S487	R.KQSES#GKM*TISVNPLNIPQYKLER.S	A0A1D8PCG5	-1.41145	0.000451825	Orf19.3328	3640236	CAALFM_C101390CA	hypothetical protein	Putative transcription factor; S. cerevisiae ortholog Hot1 is required for the transient induction of glycerol biosynthetic genes GPD1 and GPP2 in response to high osmolarity; filament induced
S297	R.SPANS#SPNPTSHYVFDVGPFASR.N	A0A1D8PCG5	-1.24449	0.0145064	Orf19.3328	3640236	CAALFM_C101390CA	hypothetical protein	Putative transcription factor; S. cerevisiae ortholog Hot1 is required for the transient induction of glycerol biosynthetic genes GPD1 and GPP2 in response to high osmolarity; filament induced
T391	R.ST#SM*SNDSNM*GIGDINNFIK.G	Q5A905	-1.33003	0.0387106	Orf19.3329	3640237	CAALFM_C101400CA	sphinganine kinase	Ortholog(s) have sphingosine-1-phosphate phosphatase activity, role in calcium-mediated signaling and endoplasmic reticulum localization
S47	R.LVIDRQSS#VILANTGER.V	A0A1D8PCH1	1.70347	0.00286919	Orf19.3332	3640240	CAALFM_C101460WA	hypothetical protein	Ortholog of Bre4 in S. cerevisiae has a role in brefeldin A resistence; a drug that affect intracellular transport; Spider biofilm induced
S70	K.GKELLDEANDKS#KEFLK.E	Q5A8Z9	0.490438	0.0100574	Orf19.3335	3640226	CAALFM_C101490WA	hypothetical protein	Plasma membrane protein of unknown function; colony morphology-related gene regulation by Ssn6; repressed by nitric oxide
S70	K.ELLDEANDKS#KEFLK.E	Q5A8Z9	0.528328	0.0153338	Orf19.3335	3640226	CAALFM_C101490WA	hypothetical protein	Plasma membrane protein of unknown function; colony morphology-related gene regulation by Ssn6; repressed by nitric oxide
S249	K.INQDVTKETSEATGETPAETIDAS#EQDEK.K	A0A1D8PCI5	0.564197	0.0287579	Orf19.3341	3640232	CAALFM_C101530CA	arginine--tRNA ligase	Putative tRNA-Arg synthetase; essential; genes encoding ribosomal subunits, translation factors, and tRNA synthetases are downregulated upon phagocytosis by murine macrophage; downregulated by growth in the mouse cecum
S615	K.ENDAEVSNDSSVDESFLVSHSETQS#L.-	Q5A8Z2	-0.810051	0.0129465	Orf19.3342	3640233	CAALFM_C101540WA	hypothetical protein	Ortholog(s) have role in positive regulation of protein autoubiquitination, protein deubiquitination and cytoplasm, nucleus localization
T387	K.KKFPIKPPVAST#PPPPQQQPQQQK.S	A0A1D8PCJ6	-0.812564	0.00263788	Orf19.3360	3640201	CAALFM_C101710WA	hypothetical protein	Protein of unknown function; flow model biofilm induced; Spider biofilm induced
S176	R.KEKPLS#PQKQK.S	A0A1D8PCJ6	-0.590602	0.000813619	Orf19.3360	3640201	CAALFM_C101710WA	hypothetical protein	Protein of unknown function; flow model biofilm induced; Spider biofilm induced
T161	R.DLHT#PIIPSNNNRK.E	A0A1D8PCJ6	-0.50352	0.0213272	Orf19.3360	3640201	CAALFM_C101710WA	hypothetical protein	Protein of unknown function; flow model biofilm induced; Spider biofilm induced
S434	K.SISKS#PSGINTPSSSSDISSK.S	A0A1D8PCJ6	0.222274	0.010042	Orf19.3360	3640201	CAALFM_C101710WA	hypothetical protein	Protein of unknown function; flow model biofilm induced; Spider biofilm induced
S176	R.KEKPLS#PQK.Q	A0A1D8PCJ6	0.230896	0.03723	Orf19.3360	3640201	CAALFM_C101710WA	hypothetical protein	Protein of unknown function; flow model biofilm induced; Spider biofilm induced
S410	K.STTTTTTITTS#PK.S	A0A1D8PCJ6	0.693536	0.00688903	Orf19.3360	3640201	CAALFM_C101710WA	hypothetical protein	Protein of unknown function; flow model biofilm induced; Spider biofilm induced
S214	R.KTS#TSSTNSCVLSIK.L	A0A1D8PCP0	0.664901	0.00283433	Orf19.4534	3645427	CAALFM_C101890CA	hypothetical protein	Putative UBX-domain (ubiquitin-regulatory domain) protein; macrophage-downregulated gene
S326	R.IPGHYPSS#PEHK.S	A0A1D8PCL8	-1.87032	0.00993093	0	30514966	CAALFM_C101930WA	hypothetical protein	#N/A
S348	K.SSSTASLQSGNNAGENDS#QYTGKRESLISR.L	A0A1D8PCL8	-1.57652	3.1553e-05	0	30514966	CAALFM_C101930WA	hypothetical protein	#N/A
S204	K.SIITEDDIISDIDS#HGDNVPKK.S	A0A1D8PCL8	-0.641419	0.0159295	0	30514966	CAALFM_C101930WA	hypothetical protein	#N/A
S191:S204	K.S#IITEDDIISDIDS#HGDNVPK.K	A0A1D8PCL8	-0.416039	0.0228866	0	30514966	CAALFM_C101930WA	hypothetical protein	#N/A
S200:S204	K.SIITEDDIIS#DIDS#HGDNVPK.K	A0A1D8PCL8	-0.16882	0.0306509	0	30514966	CAALFM_C101930WA	hypothetical protein	#N/A
S200:S204	K.SIITEDDIIS#DIDS#HGDNVPKK.S	A0A1D8PCL8	0.192274	0.00905256	0	30514966	CAALFM_C101930WA	hypothetical protein	#N/A
S336	K.SSSTAS#LQSGNNAGENDSQYTGKR.E	A0A1D8PCL8	0.419718	0.0239299	0	30514966	CAALFM_C101930WA	hypothetical protein	#N/A
S339	K.SSSTASLQS#GNNAGENDSQYTGKR.E	A0A1D8PCL8	0.549606	0.0112887	0	30514966	CAALFM_C101930WA	hypothetical protein	#N/A
S348	K.SSSTASLQSGNNAGENDS#QYTGKR.E	A0A1D8PCL8	0.659701	0.0019293	0	30514966	CAALFM_C101930WA	hypothetical protein	#N/A
T351	K.SSSTASLQSGNNAGENDSQYT#GKR.E	A0A1D8PCL8	1.51017	0.0400922	0	30514966	CAALFM_C101930WA	hypothetical protein	#N/A
S683	R.SSS#SGSSENDEGFRHK.F	A0A1D8PCM4	-0.452199	0.0497309	Orf19.3661	3644586	CAALFM_C102040CA	putative ubiquitin-specific protease	Putative deubiquitinating enzyme; induced by Mnl1 under weak acid stress
S333	R.S#LSDFTHM*K.H	A0A1D8PCQ8	0.667219	0.0388372	Orf19.3678	3644594	CAALFM_C102210WA	hypothetical protein	Ortholog of C. dubliniensis CD36 : Cd36_02060, C. parapsilosis CDC317 : CPAR2_106200, Candida tenuis NRRL Y-1498 : CANTEDRAFT_96322 and Debaryomyces hansenii CBS767 : DEHA2C02310g
S79	R.RM*S#DITGIDAVHNQRNPSDSLGGAQLYSTESGR.L	A0A1D8PCP7	-0.852493	0.00929514	Orf19.3690	3644572	CAALFM_C102320CA	bifunctional fructose-2,6-bisphosphate 2-phosphatase/6-phosphofructo-2-kinase	#N/A
S79	K.RRM*S#DITGIDAVHNQR.N	A0A1D8PCP7	-0.666572	0.00855711	Orf19.3690	3644572	CAALFM_C102320CA	bifunctional fructose-2,6-bisphosphate 2-phosphatase/6-phosphofructo-2-kinase	#N/A
S79	R.RM*S#DITGIDAVHNQR.N	A0A1D8PCP7	-0.635164	0.00910878	Orf19.3690	3644572	CAALFM_C102320CA	bifunctional fructose-2,6-bisphosphate 2-phosphatase/6-phosphofructo-2-kinase	#N/A
S51	K.RWS#FTSK.T	A0A1D8PCP7	-0.340767	0.0315194	Orf19.3690	3644572	CAALFM_C102320CA	bifunctional fructose-2,6-bisphosphate 2-phosphatase/6-phosphofructo-2-kinase	#N/A
S62	R.QNDEVLVVRGS#KKGSEGK.V	A0A1D8PCQ5	0.457235	0.00968538	0	30514969	CAALFM_C102330CA	ribosomal 60S subunit protein L26B	#N/A
S62	R.QNDEVLVVRGS#KK.G	A0A1D8PCQ5	0.653778	0.00546307	0	30514969	CAALFM_C102330CA	ribosomal 60S subunit protein L26B	#N/A
S593	K.EIQLIEPNVPYHKPSLANS#APELNLK.S	A0A1D8PCR0	-1.46104	0.00940726	Orf19.3694	3644576	CAALFM_C102370CA	hypothetical protein	Ortholog of C. dubliniensis CD36 : Cd36_02210, C. parapsilosis CDC317 : CPAR2_106350, Candida tenuis NRRL Y-1498 : CANTEDRAFT_116785 and Debaryomyces hansenii CBS767 : DEHA2C01980g
S525	K.KISDEFS#CHDDQIENRPK.S	A0A1D8PCR0	-0.573962	0.00933446	Orf19.3694	3644576	CAALFM_C102370CA	hypothetical protein	Ortholog of C. dubliniensis CD36 : Cd36_02210, C. parapsilosis CDC317 : CPAR2_106350, Candida tenuis NRRL Y-1498 : CANTEDRAFT_116785 and Debaryomyces hansenii CBS767 : DEHA2C01980g
S306	K.SIDFLSS#PITR.T	A0A1D8PCR0	0.309173	0.00495176	Orf19.3694	3644576	CAALFM_C102370CA	hypothetical protein	Ortholog of C. dubliniensis CD36 : Cd36_02210, C. parapsilosis CDC317 : CPAR2_106350, Candida tenuis NRRL Y-1498 : CANTEDRAFT_116785 and Debaryomyces hansenii CBS767 : DEHA2C01980g
S977	K.SNNS#YGSLNTSK.L	A0A1D8PCR0	0.821227	0.000284618	Orf19.3694	3644576	CAALFM_C102370CA	hypothetical protein	Ortholog of C. dubliniensis CD36 : Cd36_02210, C. parapsilosis CDC317 : CPAR2_106350, Candida tenuis NRRL Y-1498 : CANTEDRAFT_116785 and Debaryomyces hansenii CBS767 : DEHA2C01980g
T498:S500	K.ELQNNLRSNGST#PS#PPPGLSR.A	A0A1D8PCQ3	-2.04497	0.0111436	Orf19.2930	3636846	CAALFM_C102430CA	hypothetical protein	Predicted translation initiation factor; role in translational initiation; Spider biofilm repressed
S497:T498:S500	R.SNGS#T#PS#PPPGLSR.A	A0A1D8PCQ3	-0.700454	0.00259647	Orf19.2930	3636846	CAALFM_C102430CA	hypothetical protein	Predicted translation initiation factor; role in translational initiation; Spider biofilm repressed
S494	K.ELQNNLRS#NGSTPSPPPGLSR.A	A0A1D8PCQ3	-0.683381	0.00882356	Orf19.2930	3636846	CAALFM_C102430CA	hypothetical protein	Predicted translation initiation factor; role in translational initiation; Spider biofilm repressed
S494:T498:S500	R.S#NGST#PS#PPPGLSR.A	A0A1D8PCQ3	-0.589218	0.0343791	Orf19.2930	3636846	CAALFM_C102430CA	hypothetical protein	Predicted translation initiation factor; role in translational initiation; Spider biofilm repressed
S99	R.KSVSEPPLSPQPS#EKKPNLRDDIPSTFIESLNK.Y	A0A1D8PCR2	-0.525489	0.0355028	Orf19.2933	3636848	CAALFM_C102440CA	ubiquitin-specific protease	Ortholog(s) have ubiquitin-specific protease activity, role in protein deubiquitination, regulation of transcription, DNA-templated and cytoplasm, nucleus localization
S88:S95	K.S#VSEPPLS#PQPSEK.K	A0A1D8PCR2	-0.312763	0.0173532	Orf19.2933	3636848	CAALFM_C102440CA	ubiquitin-specific protease	Ortholog(s) have ubiquitin-specific protease activity, role in protein deubiquitination, regulation of transcription, DNA-templated and cytoplasm, nucleus localization
S90:S95	K.SVS#EPPLS#PQPSEKKPNLR.D	A0A1D8PCR2	0.176126	0.0438166	Orf19.2933	3636848	CAALFM_C102440CA	ubiquitin-specific protease	Ortholog(s) have ubiquitin-specific protease activity, role in protein deubiquitination, regulation of transcription, DNA-templated and cytoplasm, nucleus localization
S27	R.DLDLIYNDLSS#PESINK.L	A0A1D8PCR9	-0.841235	0.000339824	Orf19.2934	3636849	CAALFM_C102450CA	hypothetical protein	Similar to S. cerevisiae Bud20; predicted role in cellular bud site selection; rat catheter and Spider biofilm induced
S26	R.DLDLIYNDLS#SPESINKLK.N	A0A1D8PCR9	-0.349691	0.00262966	Orf19.2934	3636849	CAALFM_C102450CA	hypothetical protein	Similar to S. cerevisiae Bud20; predicted role in cellular bud site selection; rat catheter and Spider biofilm induced
S27	R.DLDLIYNDLSS#PESINKLK.N	A0A1D8PCR9	-0.24158	0.0124356	Orf19.2934	3636849	CAALFM_C102450CA	hypothetical protein	Similar to S. cerevisiae Bud20; predicted role in cellular bud site selection; rat catheter and Spider biofilm induced
S160	R.EGLYHEKNS#LERGSEQLDR.I	Q5AIB3	-1.44002	0.0268236	Orf19.2940	3636796	CAALFM_C102510WA	hypothetical protein	Putative v-SNARE of the endoplasmic reticulum membrane; possibly an essential gene, disruptants not obtained by UAU1 method
S183,S183	R.KRTFGDSDGNDGVDISLS#PQFNPVK.T	Q5AI90	-1.04749	0.000396897	Orf19.2963	3636827	CAALFM_C102740CA	hypothetical protein	Has domain(s) with predicted NAD+ binding activity
S172	R.RDEFEM*S#ATPQADSM*VALSKPLVSTGYTR.S	A0A1D8PCV8	-0.358298	0.00732727	Orf19.2964	3636828	CAALFM_C102750CA	hypothetical protein	Ortholog(s) have DNA translocase activity
S146,S146	R.YGSHLGSDLLGKSTS#SLLGDNNPVSPIQK.F	Q5AI80	-0.493983	0.00616049	Orf19.2973	3636862	CAALFM_C102850WA	hypothetical protein	Ortholog(s) have RNA binding, flap-structured DNA binding activity and role in nuclear-transcribed mRNA poly(A) tail shortening, positive regulation of endodeoxyribonuclease activity
S361,S361	K.VERPKS#ADPFVNNTK.Y	Q5AI80	-0.349553	0.0256758	Orf19.2973	3636862	CAALFM_C102850WA	hypothetical protein	Ortholog(s) have RNA binding, flap-structured DNA binding activity and role in nuclear-transcribed mRNA poly(A) tail shortening, positive regulation of endodeoxyribonuclease activity
S144:S156,S144:S156	K.S#TSSLLGDNNPVS#PIQK.F	Q5AI80	0.211391	0.0202592	Orf19.2973	3636862	CAALFM_C102850WA	hypothetical protein	Ortholog(s) have RNA binding, flap-structured DNA binding activity and role in nuclear-transcribed mRNA poly(A) tail shortening, positive regulation of endodeoxyribonuclease activity
S147:S156,S147:S156	K.STSS#LLGDNNPVS#PIQK.F	Q5AI80	0.322661	0.0190746	Orf19.2973	3636862	CAALFM_C102850WA	hypothetical protein	Ortholog(s) have RNA binding, flap-structured DNA binding activity and role in nuclear-transcribed mRNA poly(A) tail shortening, positive regulation of endodeoxyribonuclease activity
S361,S361	K.S#ADPFVNNTK.Y	Q5AI80	0.379991	0.0110236	Orf19.2973	3636862	CAALFM_C102850WA	hypothetical protein	Ortholog(s) have RNA binding, flap-structured DNA binding activity and role in nuclear-transcribed mRNA poly(A) tail shortening, positive regulation of endodeoxyribonuclease activity
S187,S187	K.SKTGTNS#PFLSNAGLSNRPQSVNDFSNIFNR.Q	Q5AI80	0.422294	0.0344297	Orf19.2973	3636862	CAALFM_C102850WA	hypothetical protein	Ortholog(s) have RNA binding, flap-structured DNA binding activity and role in nuclear-transcribed mRNA poly(A) tail shortening, positive regulation of endodeoxyribonuclease activity
S156,S156	K.STSSLLGDNNPVS#PIQK.F	Q5AI80	0.726728	0.009315	Orf19.2973	3636862	CAALFM_C102850WA	hypothetical protein	Ortholog(s) have RNA binding, flap-structured DNA binding activity and role in nuclear-transcribed mRNA poly(A) tail shortening, positive regulation of endodeoxyribonuclease activity
S201,S201	K.TGTNSPFLSNAGLSNRPQS#VNDFSNIFNR.Q	Q5AI80	0.755695	0.000264387	Orf19.2973	3636862	CAALFM_C102850WA	hypothetical protein	Ortholog(s) have RNA binding, flap-structured DNA binding activity and role in nuclear-transcribed mRNA poly(A) tail shortening, positive regulation of endodeoxyribonuclease activity
S136:S138	K.ADNNYS#DS#DKDDLAIDFENK.S	A0A1D8PCV3	-0.772478	0.00387861	Orf19.2980	3636869	CAALFM_C102900CA	mRNA splicing protein	Ortholog(s) have ATP-dependent RNA helicase activity and role in generation of catalytic spliceosome for first transesterification step, spliceosomal complex disassembly
S27,S27	K.LIHEQPNVENTIPHTLYQASS#PK.L	Q5AI58	-0.625616	0.0263151	Orf19.2995	3636842	CAALFM_C103040WA	hypothetical protein	Protein of unknown function; induced by nitric oxide; rat catheter and Spider biofilm induced
S998:S1002	R.S#IGNS#PAPSALSTPVEEK.E	A0A1D8PCY2	-1.15965	0.0173065	Orf19.2996	3636843	CAALFM_C103050WA	hypothetical protein	Ortholog(s) have cytoplasm localization
S1023	R.S#FRNSVTSLHSLNNLNR.S	A0A1D8PCY2	-0.921514	0.0481729	Orf19.2996	3636843	CAALFM_C103050WA	hypothetical protein	Ortholog(s) have cytoplasm localization
S1285	R.NVS#NATDVSSFAASIHGADALPGR.L	A0A1D8PCX0	-2.11577	0.00245175	Orf19.3003	3636925	CAALFM_C103100WA	hypothetical protein	Putative lipid-binding protein with a predicted role in calcium-dependent phospholipid-binding
S1164	K.AVGGAAS#LATGAVGGGIGAASDQLNKGAGFLK.S	A0A1D8PCX0	-1.03715	0.00210098	Orf19.3003	3636925	CAALFM_C103100WA	hypothetical protein	Putative lipid-binding protein with a predicted role in calcium-dependent phospholipid-binding
S1210	R.GRNSKDKNNNDDSSS#LAPSAISQSK.S	A0A1D8PCX0	-0.968435	0.0143912	Orf19.3003	3636925	CAALFM_C103100WA	hypothetical protein	Putative lipid-binding protein with a predicted role in calcium-dependent phospholipid-binding
S1199	R.GRNS#KDKNNNDDSSSLAPSAISQSK.S	A0A1D8PCX0	-0.67315	0.0098219	Orf19.3003	3636925	CAALFM_C103100WA	hypothetical protein	Putative lipid-binding protein with a predicted role in calcium-dependent phospholipid-binding
S21	R.EGESGS#IANKGDIDDFNK.K	A0A1D8PCX0	0.40349	0.0468397	Orf19.3003	3636925	CAALFM_C103100WA	hypothetical protein	Putative lipid-binding protein with a predicted role in calcium-dependent phospholipid-binding
S21	R.EGESGS#IANKGDIDDFNKK.V	A0A1D8PCX0	0.450232	0.0405953	Orf19.3003	3636925	CAALFM_C103100WA	hypothetical protein	Putative lipid-binding protein with a predicted role in calcium-dependent phospholipid-binding
S1252	R.EEQGEEIES#IQAAPNIR.E	A0A1D8PCX0	0.4777	0.0489928	Orf19.3003	3636925	CAALFM_C103100WA	hypothetical protein	Putative lipid-binding protein with a predicted role in calcium-dependent phospholipid-binding
S1217	K.DKNNNDDSSSLAPSAIS#QSK.S	A0A1D8PCX0	0.563456	0.0179414	Orf19.3003	3636925	CAALFM_C103100WA	hypothetical protein	Putative lipid-binding protein with a predicted role in calcium-dependent phospholipid-binding
S1152	K.SAIPIDLGAVS#DVGM*K.A	A0A1D8PCX0	0.858083	0.000599898	Orf19.3003	3636925	CAALFM_C103100WA	hypothetical protein	Putative lipid-binding protein with a predicted role in calcium-dependent phospholipid-binding
S1210	K.DKNNNDDSSS#LAPSAISQSK.S	A0A1D8PCX0	0.859631	0.000589847	Orf19.3003	3636925	CAALFM_C103100WA	hypothetical protein	Putative lipid-binding protein with a predicted role in calcium-dependent phospholipid-binding
S50,S50	K.SISNS#LEDSAGCQNPTHSKTDSQDTPARFPTAFLK.M	Q5AI22	-0.84377	0.00519631	Orf19.3030	3636859	CAALFM_C103330CA	hypothetical protein	Ortholog(s) have phosphatidylinositol-3,5-bisphosphate binding activity
S46,S46	K.S#ISNSLEDSAGCQNPTHSK.T	Q5AI22	-0.348579	0.0287725	Orf19.3030	3636859	CAALFM_C103330CA	hypothetical protein	Ortholog(s) have phosphatidylinositol-3,5-bisphosphate binding activity
S34:S36	R.RGPAIVES#DS#EEDVAPSRKK.K	A0A1D8PCZ6	-1.30576	9.81447e-06	Orf19.3035	3636889	CAALFM_C103360WA	chromatin-remodeling ATPase	Ortholog(s) have ATP-dependent DNA helicase activity, chromatin DNA binding, methylated histone binding, nucleosome-dependent ATPase activity, rDNA binding activity
S959:S962	R.KFENGSS#VPS#DVEDSGEDSRPLRR.R	A0A1D8PCZ6	-1.21985	3.95648e-05	Orf19.3035	3636889	CAALFM_C103360WA	chromatin-remodeling ATPase	Ortholog(s) have ATP-dependent DNA helicase activity, chromatin DNA binding, methylated histone binding, nucleosome-dependent ATPase activity, rDNA binding activity
S1318	K.FKEEKRDLEYES#M*DEGSCK.S	A0A1D8PCZ6	-1.1336	0.000500874	Orf19.3035	3636889	CAALFM_C103360WA	chromatin-remodeling ATPase	Ortholog(s) have ATP-dependent DNA helicase activity, chromatin DNA binding, methylated histone binding, nucleosome-dependent ATPase activity, rDNA binding activity
S962:S967	R.KFENGSSVPS#DVEDS#GEDSRPLRR.R	A0A1D8PCZ6	-1.11808	0.000131715	Orf19.3035	3636889	CAALFM_C103360WA	chromatin-remodeling ATPase	Ortholog(s) have ATP-dependent DNA helicase activity, chromatin DNA binding, methylated histone binding, nucleosome-dependent ATPase activity, rDNA binding activity
T1227	R.RVDYLFTLLRDEESDSSVGGST#PVGSVR.K	A0A1D8PCZ6	-1.09559	0.00639956	Orf19.3035	3636889	CAALFM_C103360WA	chromatin-remodeling ATPase	Ortholog(s) have ATP-dependent DNA helicase activity, chromatin DNA binding, methylated histone binding, nucleosome-dependent ATPase activity, rDNA binding activity
S958	R.KFENGS#SVPSDVEDSGEDSRPLR.R	A0A1D8PCZ6	-0.994807	0.00548607	Orf19.3035	3636889	CAALFM_C103360WA	chromatin-remodeling ATPase	Ortholog(s) have ATP-dependent DNA helicase activity, chromatin DNA binding, methylated histone binding, nucleosome-dependent ATPase activity, rDNA binding activity
S1295:S1299	K.RM*NQQRSS#ASAS#PALGHAK.F	A0A1D8PCZ6	-0.987342	0.00470555	Orf19.3035	3636889	CAALFM_C103360WA	chromatin-remodeling ATPase	Ortholog(s) have ATP-dependent DNA helicase activity, chromatin DNA binding, methylated histone binding, nucleosome-dependent ATPase activity, rDNA binding activity
S967	R.KFENGSSVPSDVEDS#GEDSRPLRR.R	A0A1D8PCZ6	-0.974592	0.000441855	Orf19.3035	3636889	CAALFM_C103360WA	chromatin-remodeling ATPase	Ortholog(s) have ATP-dependent DNA helicase activity, chromatin DNA binding, methylated histone binding, nucleosome-dependent ATPase activity, rDNA binding activity
S962	R.KFENGSSVPS#DVEDSGEDSRPLRR.R	A0A1D8PCZ6	-0.902411	0.000699482	Orf19.3035	3636889	CAALFM_C103360WA	chromatin-remodeling ATPase	Ortholog(s) have ATP-dependent DNA helicase activity, chromatin DNA binding, methylated histone binding, nucleosome-dependent ATPase activity, rDNA binding activity
S34:S36	R.GPAIVES#DS#EEDVAPSR.K	A0A1D8PCZ6	-0.89728	0.0289064	Orf19.3035	3636889	CAALFM_C103360WA	chromatin-remodeling ATPase	Ortholog(s) have ATP-dependent DNA helicase activity, chromatin DNA binding, methylated histone binding, nucleosome-dependent ATPase activity, rDNA binding activity
S1294	R.S#SASASPALGHAK.F	A0A1D8PCZ6	-0.83481	0.0420234	Orf19.3035	3636889	CAALFM_C103360WA	chromatin-remodeling ATPase	Ortholog(s) have ATP-dependent DNA helicase activity, chromatin DNA binding, methylated histone binding, nucleosome-dependent ATPase activity, rDNA binding activity
S1221	R.RVDYLFTLLRDEESDS#SVGGSTPVGSVR.K	A0A1D8PCZ6	-0.738715	0.0335458	Orf19.3035	3636889	CAALFM_C103360WA	chromatin-remodeling ATPase	Ortholog(s) have ATP-dependent DNA helicase activity, chromatin DNA binding, methylated histone binding, nucleosome-dependent ATPase activity, rDNA binding activity
S34	R.GPAIVES#DSEEDVAPSRK.K	A0A1D8PCZ6	-0.711512	0.0409404	Orf19.3035	3636889	CAALFM_C103360WA	chromatin-remodeling ATPase	Ortholog(s) have ATP-dependent DNA helicase activity, chromatin DNA binding, methylated histone binding, nucleosome-dependent ATPase activity, rDNA binding activity
S1226	R.RVDYLFTLLRDEESDSSVGGS#TPVGSVR.K	A0A1D8PCZ6	-0.65227	0.0373399	Orf19.3035	3636889	CAALFM_C103360WA	chromatin-remodeling ATPase	Ortholog(s) have ATP-dependent DNA helicase activity, chromatin DNA binding, methylated histone binding, nucleosome-dependent ATPase activity, rDNA binding activity
S34:S36	R.GPAIVES#DS#EEDVAPSRK.K	A0A1D8PCZ6	-0.603362	0.0208769	Orf19.3035	3636889	CAALFM_C103360WA	chromatin-remodeling ATPase	Ortholog(s) have ATP-dependent DNA helicase activity, chromatin DNA binding, methylated histone binding, nucleosome-dependent ATPase activity, rDNA binding activity
S36	R.RGPAIVESDS#EEDVAPSR.K	A0A1D8PCZ6	-0.59019	0.0218207	Orf19.3035	3636889	CAALFM_C103360WA	chromatin-remodeling ATPase	Ortholog(s) have ATP-dependent DNA helicase activity, chromatin DNA binding, methylated histone binding, nucleosome-dependent ATPase activity, rDNA binding activity
S34:S36	R.ERRGPAIVES#DS#EEDVAPSR.K	A0A1D8PCZ6	-0.569366	0.0200563	Orf19.3035	3636889	CAALFM_C103360WA	chromatin-remodeling ATPase	Ortholog(s) have ATP-dependent DNA helicase activity, chromatin DNA binding, methylated histone binding, nucleosome-dependent ATPase activity, rDNA binding activity
S1299	R.SSASAS#PALGHAK.F	A0A1D8PCZ6	-0.503717	0.0208015	Orf19.3035	3636889	CAALFM_C103360WA	chromatin-remodeling ATPase	Ortholog(s) have ATP-dependent DNA helicase activity, chromatin DNA binding, methylated histone binding, nucleosome-dependent ATPase activity, rDNA binding activity
S962	R.KFENGSSVPS#DVEDSGEDSRPLR.R	A0A1D8PCZ6	-0.473377	0.000640411	Orf19.3035	3636889	CAALFM_C103360WA	chromatin-remodeling ATPase	Ortholog(s) have ATP-dependent DNA helicase activity, chromatin DNA binding, methylated histone binding, nucleosome-dependent ATPase activity, rDNA binding activity
S958:S962	R.KFENGS#SVPS#DVEDSGEDSRPLR.R	A0A1D8PCZ6	-0.44952	0.00601772	Orf19.3035	3636889	CAALFM_C103360WA	chromatin-remodeling ATPase	Ortholog(s) have ATP-dependent DNA helicase activity, chromatin DNA binding, methylated histone binding, nucleosome-dependent ATPase activity, rDNA binding activity
S1297:S1299	R.SSAS#AS#PALGHAK.F	A0A1D8PCZ6	-0.324327	0.040641	Orf19.3035	3636889	CAALFM_C103360WA	chromatin-remodeling ATPase	Ortholog(s) have ATP-dependent DNA helicase activity, chromatin DNA binding, methylated histone binding, nucleosome-dependent ATPase activity, rDNA binding activity
S967	R.KFENGSSVPSDVEDS#GEDSRPLR.R	A0A1D8PCZ6	-0.30828	0.011749	Orf19.3035	3636889	CAALFM_C103360WA	chromatin-remodeling ATPase	Ortholog(s) have ATP-dependent DNA helicase activity, chromatin DNA binding, methylated histone binding, nucleosome-dependent ATPase activity, rDNA binding activity
S112	R.KTKQS#PSPPQELR.F	A0A1D8PCZ6	-0.29761	0.000544955	Orf19.3035	3636889	CAALFM_C103360WA	chromatin-remodeling ATPase	Ortholog(s) have ATP-dependent DNA helicase activity, chromatin DNA binding, methylated histone binding, nucleosome-dependent ATPase activity, rDNA binding activity
S1318	K.EEKRDLEYES#M*DEGSCK.S	A0A1D8PCZ6	-0.291507	0.0220474	Orf19.3035	3636889	CAALFM_C103360WA	chromatin-remodeling ATPase	Ortholog(s) have ATP-dependent DNA helicase activity, chromatin DNA binding, methylated histone binding, nucleosome-dependent ATPase activity, rDNA binding activity
S34:S36	R.RGPAIVES#DS#EEDVAPSRK.K	A0A1D8PCZ6	-0.266374	0.00522438	Orf19.3035	3636889	CAALFM_C103360WA	chromatin-remodeling ATPase	Ortholog(s) have ATP-dependent DNA helicase activity, chromatin DNA binding, methylated histone binding, nucleosome-dependent ATPase activity, rDNA binding activity
S962:S967	R.KFENGSSVPS#DVEDS#GEDSRPLR.R	A0A1D8PCZ6	-0.233898	0.000135387	Orf19.3035	3636889	CAALFM_C103360WA	chromatin-remodeling ATPase	Ortholog(s) have ATP-dependent DNA helicase activity, chromatin DNA binding, methylated histone binding, nucleosome-dependent ATPase activity, rDNA binding activity
S958:S962:S967	R.KFENGS#SVPS#DVEDS#GEDSRPLR.R	A0A1D8PCZ6	-0.18546	0.0176221	Orf19.3035	3636889	CAALFM_C103360WA	chromatin-remodeling ATPase	Ortholog(s) have ATP-dependent DNA helicase activity, chromatin DNA binding, methylated histone binding, nucleosome-dependent ATPase activity, rDNA binding activity
S112	K.TKQS#PSPPQELR.F	A0A1D8PCZ6	0.235958	0.00480915	Orf19.3035	3636889	CAALFM_C103360WA	chromatin-remodeling ATPase	Ortholog(s) have ATP-dependent DNA helicase activity, chromatin DNA binding, methylated histone binding, nucleosome-dependent ATPase activity, rDNA binding activity
S137,S137	R.RS#GDGNIFIK.N	Q5AI15	0.249813	0.0259787	Orf19.3037	3636891	CAALFM_C103370WA	polyadenylate-binding protein	Putative poly(A)-binding protein; regulated by Gcn4p; induced in response to amino acid starvation (3-AT treatment); protein present in exponential and stationary growth phase yeast cultures
S245,S245	K.NIDLNYS#EESFEK.L	Q5AI15	0.887787	0.00164976	Orf19.3037	3636891	CAALFM_C103370WA	polyadenylate-binding protein	Putative poly(A)-binding protein; regulated by Gcn4p; induced in response to amino acid starvation (3-AT treatment); protein present in exponential and stationary growth phase yeast cultures
T153	R.T#KSTPIFFKDKDTVNSK.I	A0A1D8PCZ8	-0.996267	0.00117605	Orf19.3041	3636904	CAALFM_C103400WA	hypothetical protein	Ortholog(s) have ubiquitin protein ligase binding activity
S628	K.SNS#SSKSDLESSLK.L	A0A1D8PCZ8	0.343736	0.0275308	Orf19.3041	3636904	CAALFM_C103400WA	hypothetical protein	Ortholog(s) have ubiquitin protein ligase binding activity
S620	K.NNS#LPNTK.S	A0A1D8PCZ8	0.459647	0.0131177	Orf19.3041	3636904	CAALFM_C103400WA	hypothetical protein	Ortholog(s) have ubiquitin protein ligase binding activity
S636	K.SDLES#SLKLR.F	A0A1D8PCZ8	0.898214	0.000534115	Orf19.3041	3636904	CAALFM_C103400WA	hypothetical protein	Ortholog(s) have ubiquitin protein ligase binding activity
S39	K.YSDKPTPIS#PNQNK.A	A0A1D8PD34	0.567241	0.008548	0	30514982	CAALFM_C103660WA	hypothetical protein	#N/A
T339	K.KLDVASQPQNASGT#PPPPPPPQSSK.-	A0A1D8PD30	-0.59247	0.000241378	Orf19.71	3648426	CAALFM_C103690WA	hypothetical protein	Ortholog(s) have role in ER to Golgi vesicle-mediated transport, protein secretion and COPII vesicle coat, Golgi membrane, cis-Golgi network localization
S337	K.KLDVASQPQNAS#GTPPPPPPPQSSK.-	A0A1D8PD30	-0.576497	0.00625017	Orf19.71	3648426	CAALFM_C103690WA	hypothetical protein	Ortholog(s) have role in ER to Golgi vesicle-mediated transport, protein secretion and COPII vesicle coat, Golgi membrane, cis-Golgi network localization
T339	K.SKKLDVASQPQNASGT#PPPPPPPQSSK.-	A0A1D8PD30	-0.471662	0.000869987	Orf19.71	3648426	CAALFM_C103690WA	hypothetical protein	Ortholog(s) have role in ER to Golgi vesicle-mediated transport, protein secretion and COPII vesicle coat, Golgi membrane, cis-Golgi network localization
T339	K.LDVASQPQNASGT#PPPPPPPQSSK.-	A0A1D8PD30	-0.457126	0.00386832	Orf19.71	3648426	CAALFM_C103690WA	hypothetical protein	Ortholog(s) have role in ER to Golgi vesicle-mediated transport, protein secretion and COPII vesicle coat, Golgi membrane, cis-Golgi network localization
S569	R.VALM*DERS#AKGEGDEFEGAFTR.S	A0A1D8PD32	-0.20116	0.0287229	Orf19.1130	3648216	CAALFM_C103720CA	hypothetical protein	#N/A
S518	K.SNIS#IIESVAPHHQQQK.N	A0A1D8PD58	-1.29011	0.0201198	Orf19.4459	3646407	CAALFM_C103870CA	hypothetical protein	Predicted heme-binding stress-related protein; Tn mutation affects filamentous growth; induced during chlamydospore formation in C. albicans and C. dubliniensis; Spider biofilm induced
S537	K.NSSGSS#AATPTAPSKK.S	A0A1D8PD58	0.516422	0.0196089	Orf19.4459	3646407	CAALFM_C103870CA	hypothetical protein	Predicted heme-binding stress-related protein; Tn mutation affects filamentous growth; induced during chlamydospore formation in C. albicans and C. dubliniensis; Spider biofilm induced
T75	R.AIHDYNDDDEDNNT#IYATTTQPLHR.S	A0A1D8PD40	-1.45797	0.0247487	Orf19.4465	3646412	CAALFM_C103910CA	hypothetical protein	Protein of unknown function; Spider biofilm induced
S571	R.QKRNEVGNNS#DDNDDDEYYQLSR.K	A0A1D8PD40	-0.53226	0.0164261	Orf19.4465	3646412	CAALFM_C103910CA	hypothetical protein	Protein of unknown function; Spider biofilm induced
S571	R.NEVGNNS#DDNDDDEYYQLSRK.Q	A0A1D8PD40	0.178689	0.00489763	Orf19.4465	3646412	CAALFM_C103910CA	hypothetical protein	Protein of unknown function; Spider biofilm induced
S101:S103	R.QM*SS#LS#ASKIEQAK.T	A0A1D8PD76	0.703043	0.00606147	Orf19.4466	3646413	CAALFM_C103920CA	palmitoyltransferase	Ortholog(s) have protein-cysteine S-palmitoyltransferase activity and role in protein palmitoylation, protein targeting to membrane
S128	R.KRS#NSQSQVVSIPTKPK.Y	A0A1D8PD53	-0.915038	0.00249857	Orf19.4471	3646418	CAALFM_C103960CA	hypothetical protein	Ortholog(s) have role in TOR signaling, protein targeting to vacuole, re-entry into mitotic cell cycle after pheromone arrest and endoplasmic reticulum membrane, endoplasmic reticulum-Golgi intermediate compartment localization
S100	R.SNSS#SSGNGGLSSNTSSVDAK.S	A0A1D8PD53	-0.789244	0.0291499	Orf19.4471	3646418	CAALFM_C103960CA	hypothetical protein	Ortholog(s) have role in TOR signaling, protein targeting to vacuole, re-entry into mitotic cell cycle after pheromone arrest and endoplasmic reticulum membrane, endoplasmic reticulum-Golgi intermediate compartment localization
S128:S130	R.KRS#NS#QSQVVSIPTKPK.Y	A0A1D8PD53	-0.193659	0.0135575	Orf19.4471	3646418	CAALFM_C103960CA	hypothetical protein	Ortholog(s) have role in TOR signaling, protein targeting to vacuole, re-entry into mitotic cell cycle after pheromone arrest and endoplasmic reticulum membrane, endoplasmic reticulum-Golgi intermediate compartment localization
S130	R.SNS#QSQVVSIPTKPK.Y	A0A1D8PD53	0.126265	0.0170615	Orf19.4471	3646418	CAALFM_C103960CA	hypothetical protein	Ortholog(s) have role in TOR signaling, protein targeting to vacuole, re-entry into mitotic cell cycle after pheromone arrest and endoplasmic reticulum membrane, endoplasmic reticulum-Golgi intermediate compartment localization
S216	R.FVDLHENKQLAS#PEEPGTVYAK.L	A0A1D8PDA0	-0.979006	0.00133959	0	30514986	CAALFM_C104430CA	sepiapterin reductase family protein	#N/A
S216	K.QLAS#PEEPGTVYAK.L	A0A1D8PDA0	0.64752	0.0484138	0	30514986	CAALFM_C104430CA	sepiapterin reductase family protein	#N/A
S309	K.ESNGS#ENEESAVPSAPTPPAAPSPTK.E	A0A1D8PDC2	-0.379363	0.00727035	Orf19.6855	3646135	CAALFM_C104620WA	hypothetical protein	Ortholog of C. dubliniensis CD36 : Cd36_04370, C. parapsilosis CDC317 : CPAR2_105410, Candida tenuis NRRL Y-1498 : CANTEDRAFT_114891 and Debaryomyces hansenii CBS767 : DEHA2D13420g
T205	K.ETESGQPEETQGNKT#PK.K	A0A1D8PDC2	0.482735	0.0338686	Orf19.6855	3646135	CAALFM_C104620WA	hypothetical protein	Ortholog of C. dubliniensis CD36 : Cd36_04370, C. parapsilosis CDC317 : CPAR2_105410, Candida tenuis NRRL Y-1498 : CANTEDRAFT_114891 and Debaryomyces hansenii CBS767 : DEHA2D13420g
S46:S51	R.S#NSQSS#VNAIPLETFR.S	A0A1D8PDD2	-0.478427	0.0174669	Orf19.783	3644762	CAALFM_C104630CA	putative aminophospholipid-translocating P4-type ATPase	Ortholog(s) have role in endocytosis, retrograde vesicle-mediated transport, Golgi to ER, vacuole organization and COPI-coated vesicle, Golgi membrane, endosome localization
S93	R.SISSS#STSLNIAAR.S	A0A1D8PDD2	0.193421	0.0175666	Orf19.783	3644762	CAALFM_C104630CA	putative aminophospholipid-translocating P4-type ATPase	Ortholog(s) have role in endocytosis, retrograde vesicle-mediated transport, Golgi to ER, vacuole organization and COPI-coated vesicle, Golgi membrane, endosome localization
T767:S770	R.LLNT#LNS#TFDK.K	A0A1D8PDD9	-0.617766	0.0417722	Orf19.765	3644774	CAALFM_C104780CA	hypothetical protein	#N/A
T705	K.RKSFTST#TTTTTSSTTTK.S	A0A1D8PDD9	-0.575134	0.000606583	Orf19.765	3644774	CAALFM_C104780CA	hypothetical protein	#N/A
S701	K.RKS#FTSTTTTTTSSTTTK.S	A0A1D8PDD9	-0.384919	0.0251045	Orf19.765	3644774	CAALFM_C104780CA	hypothetical protein	#N/A
S853	K.NVNYPPGFNTNM*VLS#PK.S	A0A1D8PDD9	0.513374	0.0218559	Orf19.765	3644774	CAALFM_C104780CA	hypothetical protein	#N/A
T1329,T1329	K.KNNT#PPQSNPEIANQSIDEILR.F	Q59MA9	-0.432624	6.27688e-05	Orf19.51	3647528	CAALFM_C104970WA	translation initiation factor 3 subunit	Ortholog(s) have mRNA binding activity, role in cytoplasmic translational initiation and eukaryotic translation initiation factor 3 complex localization
S216,S216	R.S#QNIESIR.E	Q59LX9	-0.351932	0.00126062	Orf19.4059	3647667	CAALFM_C105120WA	amino acid transporter	Ortholog(s) have role in actin cortical patch localization, arginine transport, endocytosis, late endosome to vacuole transport, lysine transport, regulation of intracellular pH
S61	R.SHFVTPPS#PPQQR.S	A0A1D8PDI8	1.26892	0.0203427	Orf19.446	3642466	CAALFM_C105200CA	hypothetical protein	Protein of unknown function; constitutive expression independent of MTL or white-opaque status; upregulated in a cyr1 mutant
S49	K.FETLQNHLDEES#DSELIYDYDR.K	Q5A2B2	0.542429	0.0471768	Orf19.429	3642482	CAALFM_C105360CA	non-canonical poly(A) polymerase	Putative non-canonical poly(A) polymerase; repressed by nitric oxide; Spider biofilm induced
T622	R.HDSDHINLT#EDEFEEDISR.T	A0A1D8PDJ5	-0.956122	0.00323726	Orf19.428	3642481	CAALFM_C105370CA	protein kinase	Putative serine/threonine kinase; induced during planktonic growth; rat catheter biofilm repressed
S601	R.VPSLLQNEVFS#DDEDDDIEYEGR.H	A0A1D8PDJ5	-0.954568	0.00177593	Orf19.428	3642481	CAALFM_C105370CA	protein kinase	Putative serine/threonine kinase; induced during planktonic growth; rat catheter biofilm repressed
S593:S601	K.DRVPS#LLQNEVFS#DDEDDDIEYEGR.H	A0A1D8PDJ5	-0.633649	0.0069676	Orf19.428	3642481	CAALFM_C105370CA	protein kinase	Putative serine/threonine kinase; induced during planktonic growth; rat catheter biofilm repressed
S616:T622	R.HDS#DHINLT#EDEFEEDISR.T	A0A1D8PDJ5	-0.46453	0.0130579	Orf19.428	3642481	CAALFM_C105370CA	protein kinase	Putative serine/threonine kinase; induced during planktonic growth; rat catheter biofilm repressed
S631	R.TLTESVDDDS#PEEKKIR.L	A0A1D8PDK0	-0.265667	0.00393517	Orf19.426	3642479	CAALFM_C105390CA	hypothetical protein	Ortholog of C. dubliniensis CD36 : Cd36_05120, C. parapsilosis CDC317 : CPAR2_107740, Candida tenuis NRRL Y-1498 : CANTEDRAFT_136277 and Debaryomyces hansenii CBS767 : DEHA2A02266g
S631	R.TLTESVDDDS#PEEK.K	A0A1D8PDK0	0.218751	0.0209489	Orf19.426	3642479	CAALFM_C105390CA	hypothetical protein	Ortholog of C. dubliniensis CD36 : Cd36_05120, C. parapsilosis CDC317 : CPAR2_107740, Candida tenuis NRRL Y-1498 : CANTEDRAFT_136277 and Debaryomyces hansenii CBS767 : DEHA2A02266g
S612	K.AVSDQERNADNETKEDDS#EGIAK.S	A0A1D8PDK0	0.254364	0.00438232	Orf19.426	3642479	CAALFM_C105390CA	hypothetical protein	Ortholog of C. dubliniensis CD36 : Cd36_05120, C. parapsilosis CDC317 : CPAR2_107740, Candida tenuis NRRL Y-1498 : CANTEDRAFT_136277 and Debaryomyces hansenii CBS767 : DEHA2A02266g
S491	R.DDFDEITS#QDQSSFNEISFPR.N	A0A1D8PDJ0	-1.06972	0.00138575	Orf19.419	3642489	CAALFM_C105440CA	hypothetical protein	Protein of unknown function; flow model biofilm induced; Spider biofilm induced
S37	K.LQDDVVVDS#PQFHQDK.S	A0A1D8PDK7	0.470697	0.0147923	Orf19.2485	3639900	CAALFM_C105660CA	hypothetical protein	Ortholog(s) have structural constituent of nuclear pore activity and role in chromosome segregation, heterochromatin assembly involved in chromatin silencing, nuclear pore complex assembly, protein targeting to nuclear inner membrane
S72	K.ASNS#YYVDAQPK.L	A0A1D8PDL6	-0.566197	0.00758439	0	30515000	CAALFM_C105720WA	ribosomal 60S subunit protein L7A	#N/A
S59	K.EYTEAERS#VIK.A	A0A1D8PDL6	0.541297	0.00490047	0	30515000	CAALFM_C105720WA	ribosomal 60S subunit protein L7A	#N/A
S75	R.LSSYS#IDSISEQPELEFQSHR.H	A0A1D8PDN5	-0.698616	0.0179798	Orf19.2459	3639866	CAALFM_C105900WA	hypothetical protein	Protein of unknown function; mRNA binds to She3; Hap43 repressed gene; Spider biofilm induced
S258	K.SRPAS#RILTPEENEELKAEIIR.Q	A0A1D8PDN5	-0.260104	0.0464873	Orf19.2459	3639866	CAALFM_C105900WA	hypothetical protein	Protein of unknown function; mRNA binds to She3; Hap43 repressed gene; Spider biofilm induced
S104:S107	K.KSSS#IGS#AELSPSR.S	A0A1D8PDN5	0.418808	0.0429733	Orf19.2459	3639866	CAALFM_C105900WA	hypothetical protein	Protein of unknown function; mRNA binds to She3; Hap43 repressed gene; Spider biofilm induced
S882	K.FDQES#QQEPTK.Q	A0A1D8PDN5	0.432802	0.000326248	Orf19.2459	3639866	CAALFM_C105900WA	hypothetical protein	Protein of unknown function; mRNA binds to She3; Hap43 repressed gene; Spider biofilm induced
S860	R.SLNLVKDS#PPILFDEK.N	A0A1D8PDN5	0.564868	0.000553732	Orf19.2459	3639866	CAALFM_C105900WA	hypothetical protein	Protein of unknown function; mRNA binds to She3; Hap43 repressed gene; Spider biofilm induced
S104	K.SSS#IGSAELSPSR.S	A0A1D8PDN5	0.637853	0.00559873	Orf19.2459	3639866	CAALFM_C105900WA	hypothetical protein	Protein of unknown function; mRNA binds to She3; Hap43 repressed gene; Spider biofilm induced
S29:S33	R.KPLPLS#STPS#TENIILTPR.T	A0A1D8PDN2	-0.339243	0.0484528	Orf19.2455	3639862	CAALFM_C105930CA	glutamine amidotransferase subunit	Ortholog(s) have gamma-glutamyltransferase activity, omega peptidase activity, role in glutathione catabolic process and cytoplasm, glutathione hydrolase complex, nuclear periphery localization
S79:S83	R.S#KQSS#PLFFSDTK.V	A0A1D8PDN2	0.509546	0.00969387	Orf19.2455	3639862	CAALFM_C105930CA	glutamine amidotransferase subunit	Ortholog(s) have gamma-glutamyltransferase activity, omega peptidase activity, role in glutathione catabolic process and cytoplasm, glutathione hydrolase complex, nuclear periphery localization
S83	K.QSS#PLFFSDTK.V	A0A1D8PDN2	0.660042	0.000279683	Orf19.2455	3639862	CAALFM_C105930CA	glutamine amidotransferase subunit	Ortholog(s) have gamma-glutamyltransferase activity, omega peptidase activity, role in glutathione catabolic process and cytoplasm, glutathione hydrolase complex, nuclear periphery localization
S51	R.LNS#PHINM*AELAIHNNQK.Q	A0A1D8PDN2	0.888838	0.00167967	Orf19.2455	3639862	CAALFM_C105930CA	glutamine amidotransferase subunit	Ortholog(s) have gamma-glutamyltransferase activity, omega peptidase activity, role in glutathione catabolic process and cytoplasm, glutathione hydrolase complex, nuclear periphery localization
S83	R.SKQSS#PLFFSDTK.V	A0A1D8PDN2	1.16588	1.53778e-05	Orf19.2455	3639862	CAALFM_C105930CA	glutamine amidotransferase subunit	Ortholog(s) have gamma-glutamyltransferase activity, omega peptidase activity, role in glutathione catabolic process and cytoplasm, glutathione hydrolase complex, nuclear periphery localization
S507:S512	R.TTLITGS#QPLPS#PLRSFNK.S	A0A1D8PDS9	-0.661809	0.000426619	Orf19.2436	3639822	CAALFM_C106090CA	serine/threonine protein kinase	Predicted protein serine/threonine kinase; Spider biofilm induced
S512	R.TTLITGSQPLPS#PLR.S	A0A1D8PDS9	0.329752	0.00807865	Orf19.2436	3639822	CAALFM_C106090CA	serine/threonine protein kinase	Predicted protein serine/threonine kinase; Spider biofilm induced
S512	R.RTTLITGSQPLPS#PLR.S	A0A1D8PDS9	2.02805	0.00820728	Orf19.2436	3639822	CAALFM_C106090CA	serine/threonine protein kinase	Predicted protein serine/threonine kinase; Spider biofilm induced
S685	R.TFS#NQFIK.C	A0A1D8PDU5	-0.81666	0.00536484	Orf19.177	3648118	CAALFM_C106320WA	hypothetical protein	Has domain(s) with predicted phosphatidylinositol binding activity and role in cell communication
S530	K.KVGETPVDTNDILSS#PILQQQK.S	A0A1D8PDU5	-0.353634	0.00611759	Orf19.177	3648118	CAALFM_C106320WA	hypothetical protein	Has domain(s) with predicted phosphatidylinositol binding activity and role in cell communication
S576	K.STFQSSPGSPLIGPSLPPSTSSPLFNPQS#PK.L	A0A1D8PDU5	0.313062	0.0399146	Orf19.177	3648118	CAALFM_C106320WA	hypothetical protein	Has domain(s) with predicted phosphatidylinositol binding activity and role in cell communication
Y591	K.M*DY#SPKPGFTPR.I	A0A1D8PDU5	0.6031	0.00146417	Orf19.177	3648118	CAALFM_C106320WA	hypothetical protein	Has domain(s) with predicted phosphatidylinositol binding activity and role in cell communication
S538	K.S#M*PSINATPK.S	A0A1D8PDU5	0.605147	0.000423014	Orf19.177	3648118	CAALFM_C106320WA	hypothetical protein	Has domain(s) with predicted phosphatidylinositol binding activity and role in cell communication
S586	K.LVNNNLNS#PK.M	A0A1D8PDU5	1.82902	2.7326e-05	Orf19.177	3648118	CAALFM_C106320WA	hypothetical protein	Has domain(s) with predicted phosphatidylinositol binding activity and role in cell communication
S556	K.STFQSSPGS#PLIGPSLPPSTSSPLFNPQSPK.L	A0A1D8PDU5	3.43182	0.0245921	Orf19.177	3648118	CAALFM_C106320WA	hypothetical protein	Has domain(s) with predicted phosphatidylinositol binding activity and role in cell communication
S24	K.APPSTTIASVTS#PSSPSLK.L	A0A1D8PDT7	-1.00143	0.00305202	Orf19.6277	3639499	CAALFM_C106340WA	hypothetical protein	Has domain(s) with predicted phosphatidylinositol binding activity and role in cell communication
S128	K.NSQFASDTSSLLKPQLS#LK.S	Q5AAN5	0.640121	0.00463979	Orf19.6276	3639562	CAALFM_C106350WA	hypothetical protein	Protein of unknown function; rat catheter biofilm repressed
S542	R.LSSSGNNTS#DILNIQGFSYTNPK.F	Q5AAN6	-1.32496	0.0477856	Orf19.6275	3639561	CAALFM_C106360WA	putative protein kinase	Ortholog(s) have ribosomal protein S6 kinase activity, role in TORC1 signaling, peptidyl-serine phosphorylation, protein autophosphorylation and cytosol localization
S551	R.LSSSGNNTSDILNIQGFS#YTNPK.F	Q5AAN6	-1.2348	0.00397047	Orf19.6275	3639561	CAALFM_C106360WA	putative protein kinase	Ortholog(s) have ribosomal protein S6 kinase activity, role in TORC1 signaling, peptidyl-serine phosphorylation, protein autophosphorylation and cytosol localization
S537	R.LSSS#GNNTSDILNIQGFSYTNPK.F	Q5AAN6	-0.405808	0.0133292	Orf19.6275	3639561	CAALFM_C106360WA	putative protein kinase	Ortholog(s) have ribosomal protein S6 kinase activity, role in TORC1 signaling, peptidyl-serine phosphorylation, protein autophosphorylation and cytosol localization
S344	K.YFNKITS#PSQLTGFK.I	A0A1D8PDT1	-1.79967	8.83374e-05	Orf19.6269	3639555	CAALFM_C106410WA	hypothetical protein	Ortholog of C. dubliniensis CD36 : Cd36_05990, Candida tenuis NRRL Y-1498 : CANTEDRAFT_91852, Debaryomyces hansenii CBS767 : DEHA2G15356g and Pichia stipitis Pignal : PICST_87044
S504	R.SNNNES#PRRSTISDEM*R.R	A0A1D8PDT1	-0.69969	0.0160881	Orf19.6269	3639555	CAALFM_C106410WA	hypothetical protein	Ortholog of C. dubliniensis CD36 : Cd36_05990, Candida tenuis NRRL Y-1498 : CANTEDRAFT_91852, Debaryomyces hansenii CBS767 : DEHA2G15356g and Pichia stipitis Pignal : PICST_87044
S216	R.RFS#NDDKSLTKPK.Q	A0A1D8PDT1	-0.615895	0.00806027	Orf19.6269	3639555	CAALFM_C106410WA	hypothetical protein	Ortholog of C. dubliniensis CD36 : Cd36_05990, Candida tenuis NRRL Y-1498 : CANTEDRAFT_91852, Debaryomyces hansenii CBS767 : DEHA2G15356g and Pichia stipitis Pignal : PICST_87044
S242	R.KVDEM*PLSM*LS#PTLPLM*FR.N	A0A1D8PDT1	-0.188179	0.000377593	Orf19.6269	3639555	CAALFM_C106410WA	hypothetical protein	Ortholog of C. dubliniensis CD36 : Cd36_05990, Candida tenuis NRRL Y-1498 : CANTEDRAFT_91852, Debaryomyces hansenii CBS767 : DEHA2G15356g and Pichia stipitis Pignal : PICST_87044
S24	R.IKS#DFSSVQSTISK.L	A0A1D8PDT9	0.444997	0.00458942	0	30515008	CAALFM_C106480CA	hypothetical protein	#N/A
S218	R.LGEKVIES#PEPTIK.S	Q5AAP7	-2.51671	0.00521956	Orf19.6264	3639550	CAALFM_C106500WA	hypothetical protein	Ortholog of C. dubliniensis CD36 : Cd36_06080, C. parapsilosis CDC317 : CPAR2_803360, Candida tenuis NRRL Y-1498 : CANTEDRAFT_112428 and Debaryomyces hansenii CBS767 : DEHA2G15532g
S218	K.VIES#PEPTIKSTGVNK.S	Q5AAP7	-1.42918	0.000429943	Orf19.6264	3639550	CAALFM_C106500WA	hypothetical protein	Ortholog of C. dubliniensis CD36 : Cd36_06080, C. parapsilosis CDC317 : CPAR2_803360, Candida tenuis NRRL Y-1498 : CANTEDRAFT_112428 and Debaryomyces hansenii CBS767 : DEHA2G15532g
S218	K.VIES#PEPTIK.S	Q5AAP7	-0.375027	0.00871186	Orf19.6264	3639550	CAALFM_C106500WA	hypothetical protein	Ortholog of C. dubliniensis CD36 : Cd36_06080, C. parapsilosis CDC317 : CPAR2_803360, Candida tenuis NRRL Y-1498 : CANTEDRAFT_112428 and Debaryomyces hansenii CBS767 : DEHA2G15532g
S845	K.KM*DDEM*DQLVEEVNQNLAEQEEARS#SGSENSSR.A	A0A1D8PDT6	-0.723916	0.000177481	Orf19.6260	3639521	CAALFM_C106530CA	putative ubiquitin-specific protease	Ubiquitin-specific protease; cleaves ubiquitin from ubiquitinated proteins; Spider biofilm induced
T1372	K.SNGRQEVTSSPVPIETDGDTDVTDSNST#.-	A0A1D8PDT6	-0.50104	0.0372468	Orf19.6260	3639521	CAALFM_C106530CA	putative ubiquitin-specific protease	Ubiquitin-specific protease; cleaves ubiquitin from ubiquitinated proteins; Spider biofilm induced
S846	K.KM*DDEM*DQLVEEVNQNLAEQEEARSS#GSENSSR.A	A0A1D8PDT6	-0.33827	0.0255211	Orf19.6260	3639521	CAALFM_C106530CA	putative ubiquitin-specific protease	Ubiquitin-specific protease; cleaves ubiquitin from ubiquitinated proteins; Spider biofilm induced
S34	K.QVTFS#PEVLAR.I	A0A1D8PDW1	-0.366002	0.00514508	Orf19.6259	3639520	CAALFM_C106540CA	exosome non-catalytic core subunit	Exosome non-catalytic core component; involved in 3'-5' RNA processing and degradation in the nucleus and cytoplasm; Spider biofilm induced
S271	K.SSSFFDNIS#SSTDERTNM*R.W	Q5AAR2	1.03057	0.0303404	Orf19.6250	3639513	CAALFM_C106600WA	hypothetical protein	Ortholog(s) have eukaryotic initiation factor 4G binding, mRNA binding activity and role in cytoplasmic mRNA processing body assembly, negative regulation of translational initiation, stress granule assembly
S429:S431	R.YKS#RS#PSEAIPKISK.I	A0A1D8PDU2	-2.84456	0.00632401	Orf19.6247	3639544	CAALFM_C106630WA	chromatin-binding protein	Ortholog(s) have chromatin binding activity
S870	K.IGQLRESLVDIDGDS#D.-	A0A1D8PDU2	-2.6162	2.07279e-06	Orf19.6247	3639544	CAALFM_C106630WA	chromatin-binding protein	Ortholog(s) have chromatin binding activity
S368	K.KLGVEEDEGNDTDALLRDS#DIEQDINVEDR.I	A0A1D8PDU2	-0.731795	0.0214333	Orf19.6247	3639544	CAALFM_C106630WA	chromatin-binding protein	Ortholog(s) have chromatin binding activity
T361:S368	K.LGVEEDEGNDT#DALLRDS#DIEQDINVEDR.I	A0A1D8PDU2	-0.691142	0.00779049	Orf19.6247	3639544	CAALFM_C106630WA	chromatin-binding protein	Ortholog(s) have chromatin binding activity
S333	K.GKTDDVLNSLFIS#DAEEEEEEEEREVGR.K	A0A1D8PDU2	-0.658865	0.00505382	Orf19.6247	3639544	CAALFM_C106630WA	chromatin-binding protein	Ortholog(s) have chromatin binding activity
S368	K.LGVEEDEGNDTDALLRDS#DIEQDINVEDR.I	A0A1D8PDU2	-0.609431	0.00761574	Orf19.6247	3639544	CAALFM_C106630WA	chromatin-binding protein	Ortholog(s) have chromatin binding activity
S333	K.GKTDDVLNSLFIS#DAEEEEEEEEREVGRK.K	A0A1D8PDU2	-0.60721	0.00589932	Orf19.6247	3639544	CAALFM_C106630WA	chromatin-binding protein	Ortholog(s) have chromatin binding activity
S431	K.SRS#PSEAIPK.I	A0A1D8PDU2	0.265393	0.038204	Orf19.6247	3639544	CAALFM_C106630WA	chromatin-binding protein	Ortholog(s) have chromatin binding activity
S485	R.SS#SNPM*THVHVAHNAK.D	A0A1D8PDX7	-1.10135	0.0259458	Orf19.6244	3639541	CAALFM_C106670WA	hypothetical protein	Ortholog of C. dubliniensis CD36 : Cd36_06250, C. parapsilosis CDC317 : CPAR2_206820, Candida tenuis NRRL Y-1498 : CANTEDRAFT_125137 and Debaryomyces hansenii CBS767 : DEHA2G13266g
S391	R.S#NSVIDLSKIVSNDDLQPM*KLK.Y	A0A1D8PDX7	-0.223497	0.0314464	Orf19.6244	3639541	CAALFM_C106670WA	hypothetical protein	Ortholog of C. dubliniensis CD36 : Cd36_06250, C. parapsilosis CDC317 : CPAR2_206820, Candida tenuis NRRL Y-1498 : CANTEDRAFT_125137 and Debaryomyces hansenii CBS767 : DEHA2G13266g
S599	R.QRS#LSSGGENRPGSQQK.L	A0A1D8PDX7	-0.217335	0.0125932	Orf19.6244	3639541	CAALFM_C106670WA	hypothetical protein	Ortholog of C. dubliniensis CD36 : Cd36_06250, C. parapsilosis CDC317 : CPAR2_206820, Candida tenuis NRRL Y-1498 : CANTEDRAFT_125137 and Debaryomyces hansenii CBS767 : DEHA2G13266g
S601	R.QRSLS#SGGENRPGSQQK.L	A0A1D8PDX7	-0.164122	0.00588912	Orf19.6244	3639541	CAALFM_C106670WA	hypothetical protein	Ortholog of C. dubliniensis CD36 : Cd36_06250, C. parapsilosis CDC317 : CPAR2_206820, Candida tenuis NRRL Y-1498 : CANTEDRAFT_125137 and Debaryomyces hansenii CBS767 : DEHA2G13266g
S393	R.SNS#VIDLSK.I	A0A1D8PDX7	0.339176	0.0306037	Orf19.6244	3639541	CAALFM_C106670WA	hypothetical protein	Ortholog of C. dubliniensis CD36 : Cd36_06250, C. parapsilosis CDC317 : CPAR2_206820, Candida tenuis NRRL Y-1498 : CANTEDRAFT_125137 and Debaryomyces hansenii CBS767 : DEHA2G13266g
S318	K.IKETS#AAYESGR.N	A0A1D8PDX7	0.369999	0.000833357	Orf19.6244	3639541	CAALFM_C106670WA	hypothetical protein	Ortholog of C. dubliniensis CD36 : Cd36_06250, C. parapsilosis CDC317 : CPAR2_206820, Candida tenuis NRRL Y-1498 : CANTEDRAFT_125137 and Debaryomyces hansenii CBS767 : DEHA2G13266g
S311	K.NLVVEEDTKPRPS#FKIK.E	A0A1D8PDX7	0.418801	0.0340661	Orf19.6244	3639541	CAALFM_C106670WA	hypothetical protein	Ortholog of C. dubliniensis CD36 : Cd36_06250, C. parapsilosis CDC317 : CPAR2_206820, Candida tenuis NRRL Y-1498 : CANTEDRAFT_125137 and Debaryomyces hansenii CBS767 : DEHA2G13266g
S402	K.IVS#NDDLQPM*KLK.Y	A0A1D8PDX7	0.429348	9.00627e-05	Orf19.6244	3639541	CAALFM_C106670WA	hypothetical protein	Ortholog of C. dubliniensis CD36 : Cd36_06250, C. parapsilosis CDC317 : CPAR2_206820, Candida tenuis NRRL Y-1498 : CANTEDRAFT_125137 and Debaryomyces hansenii CBS767 : DEHA2G13266g
S430	R.VNS#QVNLSSFGK.G	A0A1D8PDX7	0.484568	0.00533242	Orf19.6244	3639541	CAALFM_C106670WA	hypothetical protein	Ortholog of C. dubliniensis CD36 : Cd36_06250, C. parapsilosis CDC317 : CPAR2_206820, Candida tenuis NRRL Y-1498 : CANTEDRAFT_125137 and Debaryomyces hansenii CBS767 : DEHA2G13266g
S579	K.S#QQSLFQPSLTQLSK.V	A0A1D8PDX7	0.720002	0.00320873	Orf19.6244	3639541	CAALFM_C106670WA	hypothetical protein	Ortholog of C. dubliniensis CD36 : Cd36_06250, C. parapsilosis CDC317 : CPAR2_206820, Candida tenuis NRRL Y-1498 : CANTEDRAFT_125137 and Debaryomyces hansenii CBS767 : DEHA2G13266g
S426	K.INS#RVNSQVNLSSFGK.G	A0A1D8PDX7	0.742787	0.000874597	Orf19.6244	3639541	CAALFM_C106670WA	hypothetical protein	Ortholog of C. dubliniensis CD36 : Cd36_06250, C. parapsilosis CDC317 : CPAR2_206820, Candida tenuis NRRL Y-1498 : CANTEDRAFT_125137 and Debaryomyces hansenii CBS767 : DEHA2G13266g
S391:S402	R.S#NSVIDLSKIVS#NDDLQPM*K.L	A0A1D8PDX7	0.744105	8.58121e-05	Orf19.6244	3639541	CAALFM_C106670WA	hypothetical protein	Ortholog of C. dubliniensis CD36 : Cd36_06250, C. parapsilosis CDC317 : CPAR2_206820, Candida tenuis NRRL Y-1498 : CANTEDRAFT_125137 and Debaryomyces hansenii CBS767 : DEHA2G13266g
S426:S430	K.INS#RVNS#QVNLSSFGK.G	A0A1D8PDX7	0.76639	0.00221077	Orf19.6244	3639541	CAALFM_C106670WA	hypothetical protein	Ortholog of C. dubliniensis CD36 : Cd36_06250, C. parapsilosis CDC317 : CPAR2_206820, Candida tenuis NRRL Y-1498 : CANTEDRAFT_125137 and Debaryomyces hansenii CBS767 : DEHA2G13266g
S393:S402	R.SNS#VIDLSKIVS#NDDLQPM*K.L	A0A1D8PDX7	0.891267	0.00109296	Orf19.6244	3639541	CAALFM_C106670WA	hypothetical protein	Ortholog of C. dubliniensis CD36 : Cd36_06250, C. parapsilosis CDC317 : CPAR2_206820, Candida tenuis NRRL Y-1498 : CANTEDRAFT_125137 and Debaryomyces hansenii CBS767 : DEHA2G13266g
S402	K.IVS#NDDLQPM*K.L	A0A1D8PDX7	0.894491	0.00226929	Orf19.6244	3639541	CAALFM_C106670WA	hypothetical protein	Ortholog of C. dubliniensis CD36 : Cd36_06250, C. parapsilosis CDC317 : CPAR2_206820, Candida tenuis NRRL Y-1498 : CANTEDRAFT_125137 and Debaryomyces hansenii CBS767 : DEHA2G13266g
S311	K.NLVVEEDTKPRPS#FK.I	A0A1D8PDX7	0.909657	0.00475767	Orf19.6244	3639541	CAALFM_C106670WA	hypothetical protein	Ortholog of C. dubliniensis CD36 : Cd36_06250, C. parapsilosis CDC317 : CPAR2_206820, Candida tenuis NRRL Y-1498 : CANTEDRAFT_125137 and Debaryomyces hansenii CBS767 : DEHA2G13266g
S448	K.GSFPQPNGS#NTDIFR.T	A0A1D8PDX7	1.09427	0.0222583	Orf19.6244	3639541	CAALFM_C106670WA	hypothetical protein	Ortholog of C. dubliniensis CD36 : Cd36_06250, C. parapsilosis CDC317 : CPAR2_206820, Candida tenuis NRRL Y-1498 : CANTEDRAFT_125137 and Debaryomyces hansenii CBS767 : DEHA2G13266g
S579	R.KS#QQSLFQPSLTQLSK.V	A0A1D8PDX7	1.16194	0.000215804	Orf19.6244	3639541	CAALFM_C106670WA	hypothetical protein	Ortholog of C. dubliniensis CD36 : Cd36_06250, C. parapsilosis CDC317 : CPAR2_206820, Candida tenuis NRRL Y-1498 : CANTEDRAFT_125137 and Debaryomyces hansenii CBS767 : DEHA2G13266g
T234	K.DDVDQLDVT#FR.A	Q5AAS1	-1.85874	0.00107801	Orf19.6239	3639510	CAALFM_C106710WA	TFIIH complex serine/threonine-protein kinase subunit	Putative serine/threonine protein kinase; possibly an essential gene, disruptants not obtained by UAU1 method
T442	R.DLHIKPET#PEELESK.L	A0A1D8PDW2	-1.42719	0.000352848	Orf19.6233	3639504	CAALFM_C106770WA	putative oxidoreductase	Ortholog(s) have endoplasmic reticulum, nuclear envelope localization
S14:T17	R.RNS#SAT#PYTIPTK.H	Q5AAT3	0.746367	0.0497465	Orf19.6227	3639493	CAALFM_C106820WA	hypothetical protein	Ortholog of C. dubliniensis CD36 : Cd36_06390, C. parapsilosis CDC317 : CPAR2_209040, Candida tenuis NRRL Y-1498 : CANTEDRAFT_114052 and Debaryomyces hansenii CBS767 : DEHA2D14300g
S279	R.SLKS#PTLSYINNSEELPVK.T	Q5AAT3	0.759824	0.00120892	Orf19.6227	3639493	CAALFM_C106820WA	hypothetical protein	Ortholog of C. dubliniensis CD36 : Cd36_06390, C. parapsilosis CDC317 : CPAR2_209040, Candida tenuis NRRL Y-1498 : CANTEDRAFT_114052 and Debaryomyces hansenii CBS767 : DEHA2D14300g
S15	R.RNSS#ATPYTIPTK.H	Q5AAT3	0.904864	0.00181885	Orf19.6227	3639493	CAALFM_C106820WA	hypothetical protein	Ortholog of C. dubliniensis CD36 : Cd36_06390, C. parapsilosis CDC317 : CPAR2_209040, Candida tenuis NRRL Y-1498 : CANTEDRAFT_114052 and Debaryomyces hansenii CBS767 : DEHA2D14300g
S195:T196	R.QLS#T#GSESGPQIIPQR.A	Q5AAV4	0.242025	0.00642778	Orf19.6205	3639537	CAALFM_C107010WA	hypothetical protein	Ortholog of C. dubliniensis CD36 : Cd36_06550, C. parapsilosis CDC317 : CPAR2_209030, Candida tenuis NRRL Y-1498 : CANTEDRAFT_111035 and Debaryomyces hansenii CBS767 : DEHA2F25300g
S195:S198	R.QLS#TGS#ESGPQIIPQR.A	Q5AAV4	0.342153	0.0442218	Orf19.6205	3639537	CAALFM_C107010WA	hypothetical protein	Ortholog of C. dubliniensis CD36 : Cd36_06550, C. parapsilosis CDC317 : CPAR2_209030, Candida tenuis NRRL Y-1498 : CANTEDRAFT_111035 and Debaryomyces hansenii CBS767 : DEHA2F25300g
T196	R.QLST#GSESGPQIIPQR.A	Q5AAV4	1.12943	0.0274368	Orf19.6205	3639537	CAALFM_C107010WA	hypothetical protein	Ortholog of C. dubliniensis CD36 : Cd36_06550, C. parapsilosis CDC317 : CPAR2_209030, Candida tenuis NRRL Y-1498 : CANTEDRAFT_111035 and Debaryomyces hansenii CBS767 : DEHA2F25300g
S62	R.DSAVS#LNSFLEEDEENDQQQSQSQQQHLSPK.K	Q5AAW5	-2.89186	0.00130925	Orf19.6195	3639488	CAALFM_C107090CA	hypothetical protein	Ortholog(s) have 3'-5'-exoribonuclease activity
S329	K.DLYNTDSNNNEKS#DSETR.K	Q5AAW5	0.205202	0.0357238	Orf19.6195	3639488	CAALFM_C107090CA	hypothetical protein	Ortholog(s) have 3'-5'-exoribonuclease activity
T69	K.QKPHQPEVPRT#PEKAK.V	Q59WC8	0.415256	0.00673723	Orf19.4441	3644456	CAALFM_C107260CA	hypothetical protein	Ortholog(s) have DNA replication origin binding, single-stranded DNA binding activity
T1006	R.SKDST#PEVK.N	A0A1D8PE13	0.615356	0.0052931	Orf19.4437	3644472	CAALFM_C107340WA	chromatin-remodeling ATPase	Ortholog(s) have ATPase activity, DNA binding, nucleosome binding, rDNA binding activity
S535,S535	R.SQRES#GGSGIAPIR.T	Q59WD5	0.631426	0.014874	Orf19.4435	3644470	CAALFM_C107360WA	hypothetical protein	Ortholog(s) have structural constituent of cytoskeleton activity, role in microtubule nucleation and spindle pole body localization
S1030,S1030	R.KIS#IYEDAK.Q	Q59WD5	0.918428	0.000127122	Orf19.4435	3644470	CAALFM_C107360WA	hypothetical protein	Ortholog(s) have structural constituent of cytoskeleton activity, role in microtubule nucleation and spindle pole body localization
S134	R.YNLPENQETQTDIDQS#SHDKM*NSM*EDR.I	A0A1D8PE20	-1.10894	0.0267025	Orf19.4423	3644482	CAALFM_C107440WA	hypothetical protein	Putative glucosyltransferase; localized to the mitochondrial membrane
S135	R.RYNLPENQETQTDIDQSS#HDKM*NSM*EDR.I	A0A1D8PE20	-1.00295	0.00528472	Orf19.4423	3644482	CAALFM_C107440WA	hypothetical protein	Putative glucosyltransferase; localized to the mitochondrial membrane
S288	K.SSLVDGAATASADVDS#LENKQITNSTELK.S	A0A1D8PE20	-0.339288	0.0277351	Orf19.4423	3644482	CAALFM_C107440WA	hypothetical protein	Putative glucosyltransferase; localized to the mitochondrial membrane
S350:S353	R.RPS#FRS#ADSITK.R	A0A1D8PE20	0.366342	0.00695841	Orf19.4423	3644482	CAALFM_C107440WA	hypothetical protein	Putative glucosyltransferase; localized to the mitochondrial membrane
S389:S392	R.SLNRS#NSS#LISIPQRPSSLGK.S	A0A1D8PE20	0.394653	0.0294749	Orf19.4423	3644482	CAALFM_C107440WA	hypothetical protein	Putative glucosyltransferase; localized to the mitochondrial membrane
S401:S406	R.SNSSLISIPQRPS#SLGKS#PVADSR.M	A0A1D8PE20	0.481851	0.0388116	Orf19.4423	3644482	CAALFM_C107440WA	hypothetical protein	Putative glucosyltransferase; localized to the mitochondrial membrane
S221	K.SQLSNQETGTSPQPQPPKSES#NGFLSSLLNAAANK.M	A0A1D8PE20	0.507246	0.00210179	Orf19.4423	3644482	CAALFM_C107440WA	hypothetical protein	Putative glucosyltransferase; localized to the mitochondrial membrane
S288	K.SSLVDGAATASADVDS#LENK.Q	A0A1D8PE20	0.573859	0.00605985	Orf19.4423	3644482	CAALFM_C107440WA	hypothetical protein	Putative glucosyltransferase; localized to the mitochondrial membrane
S55	R.NSQGS#SDNSFEFR.G	A0A1D8PE20	0.640128	0.00877444	Orf19.4423	3644482	CAALFM_C107440WA	hypothetical protein	Putative glucosyltransferase; localized to the mitochondrial membrane
S83:S85	K.TRPLS#LS#PQK.S	A0A1D8PE20	0.69039	0.00571299	Orf19.4423	3644482	CAALFM_C107440WA	hypothetical protein	Putative glucosyltransferase; localized to the mitochondrial membrane
T240:S243	K.M*ISST#PPS#PPPEDK.K	A0A1D8PE20	0.861988	0.000585641	Orf19.4423	3644482	CAALFM_C107440WA	hypothetical protein	Putative glucosyltransferase; localized to the mitochondrial membrane
T240:S243	K.M*ISST#PPS#PPPEDKKK.D	A0A1D8PE20	0.902448	0.00723298	Orf19.4423	3644482	CAALFM_C107440WA	hypothetical protein	Putative glucosyltransferase; localized to the mitochondrial membrane
S239:S243	K.M*ISS#TPPS#PPPEDKKK.D	A0A1D8PE20	0.965161	0.000491135	Orf19.4423	3644482	CAALFM_C107440WA	hypothetical protein	Putative glucosyltransferase; localized to the mitochondrial membrane
T112	K.LSTADT#SYEDR.R	A0A1D8PE20	1.18227	0.00848266	Orf19.4423	3644482	CAALFM_C107440WA	hypothetical protein	Putative glucosyltransferase; localized to the mitochondrial membrane
S243	K.M*ISSTPPS#PPPEDKKK.D	A0A1D8PE20	1.27525	0.000203158	Orf19.4423	3644482	CAALFM_C107440WA	hypothetical protein	Putative glucosyltransferase; localized to the mitochondrial membrane
S713:S715	R.IVGVNRS#RS#LVM*AK.N	A0A1D8PE70	-0.448305	2.96167e-06	Orf19.2786	3646673	CAALFM_C107590CA	hypothetical protein	Ortholog(s) have AP-2 adaptor complex, cellular bud neck localization
S766	K.EKEPES#NEEDDDNGKTEIVNGTTSITK.T	A0A1D8PE56	0.359716	0.0303367	Orf19.4713	3647955	CAALFM_C107780WA	hypothetical protein	Ortholog of C. dubliniensis CD36 : Cd36_07300, C. parapsilosis CDC317 : CPAR2_208300, Candida tenuis NRRL Y-1498 : CANTEDRAFT_95879 and Debaryomyces hansenii CBS767 : DEHA2F26246g
S68	R.RNS#NTNNSLKEKK.R	Q5A7B3	-1.42016	0.00021804	Orf19.5049	3640706	CAALFM_C107790CA	hypothetical protein	Putative U3-containing 90S preribosome processome complex subunit; Hap43-induced gene; rat catheter and Spider biofilm induced; F-12/CO2 early biofilm induced
S68	R.RNS#NTNNSLKEK.K	Q5A7B3	-0.336719	0.0445511	Orf19.5049	3640706	CAALFM_C107790CA	hypothetical protein	Putative U3-containing 90S preribosome processome complex subunit; Hap43-induced gene; rat catheter and Spider biofilm induced; F-12/CO2 early biofilm induced
S68	R.RNS#NTNNSLK.E	Q5A7B3	0.459255	0.00152533	Orf19.5049	3640706	CAALFM_C107790CA	hypothetical protein	Putative U3-containing 90S preribosome processome complex subunit; Hap43-induced gene; rat catheter and Spider biofilm induced; F-12/CO2 early biofilm induced
S195	R.DLVTSEERNDSRIS#ETSK.H	Q5A7B0	0.23904	0.0332147	Orf19.5051	3640708	CAALFM_C107810CA	hypothetical protein	Has domain(s) with predicted protein heterodimerization activity
S192	R.DLVTSEERNDS#RISETSK.H	Q5A7B0	0.462841	0.00152369	Orf19.5051	3640708	CAALFM_C107810CA	hypothetical protein	Has domain(s) with predicted protein heterodimerization activity
S454	K.SQS#DELNTK.E	Q5A7B0	0.540912	0.00650172	Orf19.5051	3640708	CAALFM_C107810CA	hypothetical protein	Has domain(s) with predicted protein heterodimerization activity
S353:S359	R.VS#RSSAGS#FDLDSTIM*AFR.Q	A0A1D8PE74	-0.758827	0.000488028	Orf19.5070	3640697	CAALFM_C107990CA	hypothetical protein	Similar to cell-wall mannoproteins; induced in low iron; induced in cyr1 homozygous null; regulated by osmotic and oxidative stress via Hog1; Spider biofilm induced
S353:S355:S356	R.RVS#RS#S#AGSFDLDSTIM*AFR.Q	A0A1D8PE74	-0.407852	0.0319041	Orf19.5070	3640697	CAALFM_C107990CA	hypothetical protein	Similar to cell-wall mannoproteins; induced in low iron; induced in cyr1 homozygous null; regulated by osmotic and oxidative stress via Hog1; Spider biofilm induced
S355	R.S#SAGSFDLDSTIM*AFR.Q	A0A1D8PE74	0.303846	0.0318994	Orf19.5070	3640697	CAALFM_C107990CA	hypothetical protein	Similar to cell-wall mannoproteins; induced in low iron; induced in cyr1 homozygous null; regulated by osmotic and oxidative stress via Hog1; Spider biofilm induced
S242	R.SRSSS#IGNNM*K.K	A0A1D8PE74	0.524725	0.0148643	Orf19.5070	3640697	CAALFM_C107990CA	hypothetical protein	Similar to cell-wall mannoproteins; induced in low iron; induced in cyr1 homozygous null; regulated by osmotic and oxidative stress via Hog1; Spider biofilm induced
S356	R.SS#AGSFDLDSTIM*AFR.Q	A0A1D8PE74	0.531939	0.00465158	Orf19.5070	3640697	CAALFM_C107990CA	hypothetical protein	Similar to cell-wall mannoproteins; induced in low iron; induced in cyr1 homozygous null; regulated by osmotic and oxidative stress via Hog1; Spider biofilm induced
T236	R.QSSSNQTANGTVSPDT#RSR.S	A0A1D8PE74	0.585613	0.04165	Orf19.5070	3640697	CAALFM_C107990CA	hypothetical protein	Similar to cell-wall mannoproteins; induced in low iron; induced in cyr1 homozygous null; regulated by osmotic and oxidative stress via Hog1; Spider biofilm induced
S26	R.LANDS#DNSLLINVAPTGR.Q	A0A1D8PEB6	-2.23365	0.00404656	Orf19.5093	3640733	CAALFM_C108160WA	hypothetical protein	Ortholog(s) have DNA translocase activity
S1173	R.KM*S#LLDDPNARAGTSTTVSNDPYSGSK.F	A0A1D8PE79	-2.15051	0.000250883	Orf19.5095	3640743	CAALFM_C108180CA	oxysterol-binding protein related protein	Putative oxysterol-binding protein; caspofungin induced; possibly an essential gene, disruptants not obtained by UAU1 method
S378:S381	R.RS#TPS#PATIESATTNETDTQHEHSNEPEKK.R	A0A1D8PE79	-1.20752	0.0295143	Orf19.5095	3640743	CAALFM_C108180CA	oxysterol-binding protein related protein	Putative oxysterol-binding protein; caspofungin induced; possibly an essential gene, disruptants not obtained by UAU1 method
S426	K.RISSSSS#FESGDESTGELSR.S	A0A1D8PE79	-0.711726	0.0254427	Orf19.5095	3640743	CAALFM_C108180CA	oxysterol-binding protein related protein	Putative oxysterol-binding protein; caspofungin induced; possibly an essential gene, disruptants not obtained by UAU1 method
S426	R.ISSSSS#FESGDESTGELSR.S	A0A1D8PE79	-0.431928	0.0234191	Orf19.5095	3640743	CAALFM_C108180CA	oxysterol-binding protein related protein	Putative oxysterol-binding protein; caspofungin induced; possibly an essential gene, disruptants not obtained by UAU1 method
S429	R.ISSSSSFES#GDESTGELSR.S	A0A1D8PE79	-0.38464	0.0135269	Orf19.5095	3640743	CAALFM_C108180CA	oxysterol-binding protein related protein	Putative oxysterol-binding protein; caspofungin induced; possibly an essential gene, disruptants not obtained by UAU1 method
S429:S433	K.RISSSSSFES#GDES#TGELSR.S	A0A1D8PE79	-0.310298	0.0375877	Orf19.5095	3640743	CAALFM_C108180CA	oxysterol-binding protein related protein	Putative oxysterol-binding protein; caspofungin induced; possibly an essential gene, disruptants not obtained by UAU1 method
S1173	R.KM*S#LLDDPNAR.A	A0A1D8PE79	0.126161	0.0082378	Orf19.5095	3640743	CAALFM_C108180CA	oxysterol-binding protein related protein	Putative oxysterol-binding protein; caspofungin induced; possibly an essential gene, disruptants not obtained by UAU1 method
S656	K.SAGTVSPAPSNKNLS#NEEKQPENK.Q	A0A1D8PE79	0.346072	0.0328914	Orf19.5095	3640743	CAALFM_C108180CA	oxysterol-binding protein related protein	Putative oxysterol-binding protein; caspofungin induced; possibly an essential gene, disruptants not obtained by UAU1 method
T472	R.LTGISTTQGAPFELSST#R.K	A0A1D8PE79	0.482395	0.00717376	Orf19.5095	3640743	CAALFM_C108180CA	oxysterol-binding protein related protein	Putative oxysterol-binding protein; caspofungin induced; possibly an essential gene, disruptants not obtained by UAU1 method
S647	K.SAGTVS#PAPSNK.N	A0A1D8PE79	0.670433	0.00292614	Orf19.5095	3640743	CAALFM_C108180CA	oxysterol-binding protein related protein	Putative oxysterol-binding protein; caspofungin induced; possibly an essential gene, disruptants not obtained by UAU1 method
S807	K.S#SIAPPTVIENK.E	A0A1D8PE79	0.879321	0.00244428	Orf19.5095	3640743	CAALFM_C108180CA	oxysterol-binding protein related protein	Putative oxysterol-binding protein; caspofungin induced; possibly an essential gene, disruptants not obtained by UAU1 method
T94:S96	R.NLSPVSQT#NS#PIVTIPPTPLER.N	A0A1D8PEB3	-0.400653	0.0038772	Orf19.384	3646504	CAALFM_C108390CA	hypothetical protein	Ortholog(s) have Golgi apparatus, cytosol, nucleus localization
S89	R.NLS#PVSQTNSPIVTIPPTPLER.N	A0A1D8PEB3	-0.342409	0.00182461	Orf19.384	3646504	CAALFM_C108390CA	hypothetical protein	Ortholog(s) have Golgi apparatus, cytosol, nucleus localization
S126	R.ASPSSSQATS#LLGQASTGSDQSTQAASPGLLTVK.I	Q59QB9	-0.511934	0.0261244	Orf19.399	3646497	CAALFM_C108540CA	serine/threonine protein kinase	Putative serine/threonine protein kinase; possibly an essential gene, disruptants not obtained by UAU1 method
S62	R.QSTDS#RNTISVNNLADDVSK.L	Q59QB9	0.811902	0.00122427	Orf19.399	3646497	CAALFM_C108540CA	serine/threonine protein kinase	Putative serine/threonine protein kinase; possibly an essential gene, disruptants not obtained by UAU1 method
S85	K.LTVAADRS#PEKSLGSNNK.A	Q59QB9	1.57677	0.00120353	Orf19.399	3646497	CAALFM_C108540CA	serine/threonine protein kinase	Putative serine/threonine protein kinase; possibly an essential gene, disruptants not obtained by UAU1 method
S85	K.LTVAADRS#PEK.S	Q59QB9	2.2124	0.00705939	Orf19.399	3646497	CAALFM_C108540CA	serine/threonine protein kinase	Putative serine/threonine protein kinase; possibly an essential gene, disruptants not obtained by UAU1 method
S961	R.ATSRAPSVPVSS#DEDDVVEEKEITAHTENK.S	A0A1D8PEE1	-0.942383	0.00201205	Orf19.4729	3634936	CAALFM_C108700WA	hypothetical protein	#N/A
S956:S960:S961	R.ATSRAPS#VPVS#S#DEDDVVEEKEITAHTENK.S	A0A1D8PEE1	-0.927122	0.00227361	Orf19.4729	3634936	CAALFM_C108700WA	hypothetical protein	#N/A
S960:S961	R.ATSRAPSVPVS#S#DEDDVVEEKEITAHTENK.S	A0A1D8PEE1	-0.84713	0.00409987	Orf19.4729	3634936	CAALFM_C108700WA	hypothetical protein	#N/A
S1075:T1077	K.HLS#AT#PPAPPPPPPPPPSQAVIK.A	A0A1D8PEE1	-0.732442	0.00269305	Orf19.4729	3634936	CAALFM_C108700WA	hypothetical protein	#N/A
S185	R.KSS#YVSANNTSDRLNNPM*ISSDQR.S	A0A1D8PEE1	-0.726701	0.0231467	Orf19.4729	3634936	CAALFM_C108700WA	hypothetical protein	#N/A
S960:S961	R.APSVPVS#S#DEDDVVEEKEITAHTENK.S	A0A1D8PEE1	-0.585538	0.00300604	Orf19.4729	3634936	CAALFM_C108700WA	hypothetical protein	#N/A
S254	R.KSS#ISDISSQKFSR.E	A0A1D8PEE1	-0.426504	0.0053798	Orf19.4729	3634936	CAALFM_C108700WA	hypothetical protein	#N/A
S1075:T1077	R.KHLS#AT#PPAPPPPPPPPPSQAVIK.A	A0A1D8PEE1	-0.29988	0.0499252	Orf19.4729	3634936	CAALFM_C108700WA	hypothetical protein	#N/A
S169	R.KSS#DPTSNYDAK.E	A0A1D8PEE1	0.308686	0.0038601	Orf19.4729	3634936	CAALFM_C108700WA	hypothetical protein	#N/A
T336	K.KT#SFTDYLK.S	A0A1D8PEE1	0.325909	0.0106131	Orf19.4729	3634936	CAALFM_C108700WA	hypothetical protein	#N/A
S168	R.KS#SDPTSNYDAKEDK.R	A0A1D8PEE1	0.337896	0.0323979	Orf19.4729	3634936	CAALFM_C108700WA	hypothetical protein	#N/A
S528:S529	K.TKLNTIFS#S#DEEEEEIQEPDFK.L	A0A1D8PEE1	0.495996	0.00406844	Orf19.4729	3634936	CAALFM_C108700WA	hypothetical protein	#N/A
S93	K.VSLREQS#EERVINERPESFYFAK.Y	A0A1D8PEE0	-0.555737	0.000462153	Orf19.4730	3634937	CAALFM_C108710WA	hypothetical protein	Ortholog of S. cerevisiae : YNL050C, C. glabrata CBS138 : CAGL0G01276g, C. dubliniensis CD36 : Cd36_08220, C. parapsilosis CDC317 : CPAR2_804440 and Candida tenuis NRRL Y-1498 : CANTEDRAFT_94168
S88	K.VS#LREQSEERVINERPESFYFAK.Y	A0A1D8PEE0	-0.468252	0.020172	Orf19.4730	3634937	CAALFM_C108710WA	hypothetical protein	Ortholog of S. cerevisiae : YNL050C, C. glabrata CBS138 : CAGL0G01276g, C. dubliniensis CD36 : Cd36_08220, C. parapsilosis CDC317 : CPAR2_804440 and Candida tenuis NRRL Y-1498 : CANTEDRAFT_94168
T61:S63	R.ELEEELPEIEQELT#DS#EEEDEFIR.R	A0A1D8PEG9	-0.931716	4.97608e-05	Orf19.4749	3634925	CAALFM_C108900WA	hypothetical protein	Protein of unknown function; hyphal-induced expression, regulated by Cyr1, Ras1, Efg1; Hap43-induced gene; Spider biofilm induced
S13	R.KQS#LSDDVREGSSSISTNVADR.S	A0A1D8PEG9	-0.843552	0.0173895	Orf19.4749	3634925	CAALFM_C108900WA	hypothetical protein	Protein of unknown function; hyphal-induced expression, regulated by Cyr1, Ras1, Efg1; Hap43-induced gene; Spider biofilm induced
S89,S89	K.S#KNHNIHKLPK.L	Q5AQ57	-1.91576	0.00177091	Orf19.4751	3634910	CAALFM_C108920WA	mitochondrial 37S ribosomal protein RSM25	Ortholog(s) have structural constituent of ribosome activity and mitochondrial small ribosomal subunit localization
T541	R.ELDT#PPSSDDRNKD.-	A0A1D8PEG0	-0.373018	0.0240767	Orf19.4756	3634915	CAALFM_C109000WA	hypothetical protein	Ortholog of S. cerevisiae : YTP1, C. dubliniensis CD36 : Cd36_08490, C. parapsilosis CDC317 : CPAR2_801590, Candida tenuis NRRL Y-1498 : CANTEDRAFT_109732 and Debaryomyces hansenii CBS767 : DEHA2C10384g
S544	R.ELDTPPS#SDDRNKD.-	A0A1D8PEG0	-0.28684	0.0435123	Orf19.4756	3634915	CAALFM_C109000WA	hypothetical protein	Ortholog of S. cerevisiae : YTP1, C. dubliniensis CD36 : Cd36_08490, C. parapsilosis CDC317 : CPAR2_801590, Candida tenuis NRRL Y-1498 : CANTEDRAFT_109732 and Debaryomyces hansenii CBS767 : DEHA2C10384g
S602	K.ESDSSASDVS#QPKETEEDEVRNEEPERI.-	A0A1D8PEJ7	-0.610813	0.0045597	Orf19.4779	3634897	CAALFM_C109210CA	basic amino acid transporter	Putative transporter; slightly similar to the Sit1p siderophore transporter; Gcn4p-regulated; fungal-specific; induced by Mnl1p under weak acid stress
S597:T607	K.ESDSS#ASDVSQPKET#EEDEVRNEEPERI.-	A0A1D8PEJ7	-0.474846	0.0160451	Orf19.4779	3634897	CAALFM_C109210CA	basic amino acid transporter	Putative transporter; slightly similar to the Sit1p siderophore transporter; Gcn4p-regulated; fungal-specific; induced by Mnl1p under weak acid stress
S364	R.KFETADVGVDGLDS#PVRAQPEISAK.S	A0A1D8PEJ4	-0.709297	0.000894674	Orf19.4787	3634829	CAALFM_C109280WA	hypothetical protein	Ortholog(s) have cytoplasm, nucleus localization
S327	K.ATSS#VNNTTIPAQR.R	A0A1D8PEJ4	0.412944	0.0190656	Orf19.4787	3634829	CAALFM_C109280WA	hypothetical protein	Ortholog(s) have cytoplasm, nucleus localization
S536:S539	R.SLNAS#PVS#INNESGGTSSLK.F	A0A1D8PEK5	0.509624	0.0106833	Orf19.4792	3634834	CAALFM_C109320CA	hypothetical protein	Protein with a regulator of G-protein signaling domain; Plc1-regulated; Spider biofilm induced; rat catheter biofilm repressed
S73,S73	R.RQS#KGASGVPRPNLR.K	Q5AQ12	-2.81887	0.000128584	Orf19.4796	3634805	CAALFM_C109350WA	hypothetical protein	Putative eIF-4E-binding repressor of CAP-dependent translation; stationary phase enriched protein
S107,S107	K.KGS#FAEGDAIEERIK.F	Q5AQ12	-2.32737	3.92091e-05	Orf19.4796	3634805	CAALFM_C109350WA	hypothetical protein	Putative eIF-4E-binding repressor of CAP-dependent translation; stationary phase enriched protein
S107,S107	K.KGS#FAEGDAIEERIKFR.E	Q5AQ12	-2.19371	0.00465159	Orf19.4796	3634805	CAALFM_C109350WA	hypothetical protein	Putative eIF-4E-binding repressor of CAP-dependent translation; stationary phase enriched protein
S107,S107	K.GS#FAEGDAIEER.I	Q5AQ12	-1.27018	0.00950815	Orf19.4796	3634805	CAALFM_C109350WA	hypothetical protein	Putative eIF-4E-binding repressor of CAP-dependent translation; stationary phase enriched protein
S107,S107	K.KGS#FAEGDAIEER.I	Q5AQ12	0.190736	0.0226329	Orf19.4796	3634805	CAALFM_C109350WA	hypothetical protein	Putative eIF-4E-binding repressor of CAP-dependent translation; stationary phase enriched protein
S212,S212	R.LKS#NLHVEDDGKR.L	Q5APG7	-0.448711	0.000208895	Orf19.4798	3634807	CAALFM_C109360CA	hypothetical protein	Ortholog(s) have role in establishment of protein localization to plasma membrane and mitochondrion, plasma membrane localization
S224,S224	K.SNLHVEDDGKRLS#R.A	Q5APG7	-0.394154	0.0449347	Orf19.4798	3634807	CAALFM_C109360CA	hypothetical protein	Ortholog(s) have role in establishment of protein localization to plasma membrane and mitochondrion, plasma membrane localization
T866:S872,T866:S872	R.T#VDSVNS#TNDGLIYTYDSK.Y	Q5APG7	-0.326425	0.0458159	Orf19.4798	3634807	CAALFM_C109360CA	hypothetical protein	Ortholog(s) have role in establishment of protein localization to plasma membrane and mitochondrion, plasma membrane localization
S212,S212	R.LKS#NLHVEDDGK.R	Q5APG7	0.265957	0.000141783	Orf19.4798	3634807	CAALFM_C109360CA	hypothetical protein	Ortholog(s) have role in establishment of protein localization to plasma membrane and mitochondrion, plasma membrane localization
S340	R.AS#SQGTTIFTPVTPPVTTSPVITIGEDLDCTKR.T	A0A1D8PEN5	-0.702748	0.0066644	Orf19.4818	3634885	CAALFM_C109540WA	hypothetical protein	Protein of unknown function; Spider biofilm induced
S138,S138	K.M*FNQVEGGDSPPSES#ATSTQDPAELK.Y	P0CB63	-1.91327	0.000152419	Orf19.4839	3634822	CAALFM_C109750WA	GET complex subunit	GET complex subunit; expression downregulated in an ssr1 null mutant
S574:S581	R.YEDFNDVDDILVDSS#DIEDGGS#VR.E	Q5APC2	-0.220157	0.0369909	Orf19.4843	3634842	CAALFM_C109780CA	putative ferric-chelate reductase	Putative iron/copper reductas; involved in iron homeostasis; rat catheter and Spider biofilm induced
T41	R.DTKEHT#PTTALSYDEVNDDLDELVALRGEGR.Y	Q5APC1	-1.06178	0.00119592	Orf19.4844	3634843	CAALFM_C109790CA	TRAMP complex RNA-binding subunit	Ortholog(s) have ATP-dependent 3'-5' RNA helicase activity, RNA binding, polynucleotide adenylyltransferase activity, protein binding, bridging activity
T566	K.TIGNGNNELT#DDDVEIKRNR.F	Q5APB5	-0.906753	0.0150612	Orf19.4850	3634849	CAALFM_C109850CA	hypothetical protein	Ortholog(s) have cytosol, nucleus localization
S491	K.LAS#LDNLRQDGK.F	Q5APB5	0.346311	0.0459457	Orf19.4850	3634849	CAALFM_C109850CA	hypothetical protein	Ortholog(s) have cytosol, nucleus localization
S257	R.AAGS#M*FNNFNPFGR.-	Q5APA2	-1.06902	0.00597401	Orf19.4862	3634861	CAALFM_C109950CA	hypothetical protein	Putative integral membrane protein; S. cerevisiae ortholog Tvp23 localizes to late Golgi vesicles; rat catheter biofilm induced
S121	K.LNNKEFDENDAKS#PTTTTPQPSRK.D	A0A1D8PER7	0.214297	0.0124325	Orf19.4875	3634814	CAALFM_C110080WA	U2-type spliceosomal complex subunit	Ortholog(s) have role in mRNA splicing, via spliceosome and U2-type spliceosomal complex localization
S121	K.EFDENDAKS#PTTTAPQPSRK.D	Q5AP89	0.333072	0.0281303	Orf19.4875	3634814	CAALFM_C110080WA	U2-type spliceosomal complex subunit	Ortholog(s) have role in mRNA splicing, via spliceosome and U2-type spliceosomal complex localization
T809,T809	R.TIASETTTEKHST#DEEEVEEEAEVDSVDIPIRR.V	Q5AP87	-0.739575	0.0180844	Orf19.4878	3634817	CAALFM_C110090CA	hypothetical protein	Protein of unknown function; Hap43-repressed; rat catheter biofilm repressed
T499	K.RPT#TEESLSNIEPTIPSRPATK.K	Q5AP87	-0.457877	0.0289355	Orf19.4878	3634817	CAALFM_C110090CA	hypothetical protein	Protein of unknown function; Hap43-repressed; rat catheter biofilm repressed
S583,S583	K.IAAFQQQLFNPANASS#EEDVSSTGSKQPESGIR.K	Q5AP87	-0.444167	0.00278562	Orf19.4878	3634817	CAALFM_C110090CA	hypothetical protein	Protein of unknown function; Hap43-repressed; rat catheter biofilm repressed
S603,S603	R.KRS#TENSVLSR.F	Q5AP87	-0.418559	0.0129466	Orf19.4878	3634817	CAALFM_C110090CA	hypothetical protein	Protein of unknown function; Hap43-repressed; rat catheter biofilm repressed
S299,S299	K.KSDVDNKPSEPTTSTDS#STEPTAPAR.G	Q5AP87	-0.375117	0.0490989	Orf19.4878	3634817	CAALFM_C110090CA	hypothetical protein	Protein of unknown function; Hap43-repressed; rat catheter biofilm repressed
T476	R.ATT#NDSLTSLDSTSKPPKPVIPK.R	Q5AP87	-0.268105	0.0220675	Orf19.4878	3634817	CAALFM_C110090CA	hypothetical protein	Protein of unknown function; Hap43-repressed; rat catheter biofilm repressed
T476	R.ATT#NDSLTSLNSTSKPPKPVISK.R	A0A1D8PEW4	0.185459	0.0391248	Orf19.4878	3634817	CAALFM_C110090CA	hypothetical protein	Protein of unknown function; Hap43-repressed; rat catheter biofilm repressed
S706,S706	K.EIIS#TSVEDLKKPK.I	Q5AP87	0.26956	0.0297715	Orf19.4878	3634817	CAALFM_C110090CA	hypothetical protein	Protein of unknown function; Hap43-repressed; rat catheter biofilm repressed
T434	R.DGDDT#DSGELYSEQQQNKEKEK.I	Q5AP87	0.404608	0.000554381	Orf19.4878	3634817	CAALFM_C110090CA	hypothetical protein	Protein of unknown function; Hap43-repressed; rat catheter biofilm repressed
T26,T26	K.LSTT#PNIPARPQTRPQK.Q	Q5AP87	0.497985	0.00215435	Orf19.4878	3634817	CAALFM_C110090CA	hypothetical protein	Protein of unknown function; Hap43-repressed; rat catheter biofilm repressed
T220,T220	R.QSTTTQDEYKPQASNT#PDIVTRPQTK.T	Q5AP87	0.528326	0.0215467	Orf19.4878	3634817	CAALFM_C110090CA	hypothetical protein	Protein of unknown function; Hap43-repressed; rat catheter biofilm repressed
S236,S236	K.SVS#NEELDKPGDEPSSKDQDNER.H	Q5AP87	0.601519	0.0011294	Orf19.4878	3634817	CAALFM_C110090CA	hypothetical protein	Protein of unknown function; Hap43-repressed; rat catheter biofilm repressed
T434	R.DGDDT#DSGELYSEQQQNKEKEETVPATSTPK.I	A0A1D8PEW4	0.629495	0.0240612	Orf19.4878	3634817	CAALFM_C110090CA	hypothetical protein	Protein of unknown function; Hap43-repressed; rat catheter biofilm repressed
S457	K.EKEETVPATS#TPK.I	A0A1D8PEW4	0.88942	0.00362318	Orf19.4878	3634817	CAALFM_C110090CA	hypothetical protein	Protein of unknown function; Hap43-repressed; rat catheter biofilm repressed
S236,S236	K.TEKSVS#NEELDKPGDEPSSKDQDNER.H	Q5AP87	0.904185	0.0215348	Orf19.4878	3634817	CAALFM_C110090CA	hypothetical protein	Protein of unknown function; Hap43-repressed; rat catheter biofilm repressed
Y1341	R.LQIDGDNVSIIKKY#SDEDIER.R	A0A1D8PES9	-0.233719	0.00322793	Orf19.4893	3634880	CAALFM_C110230CA	hypothetical protein	Ortholog of C. dubliniensis CD36 : Cd36_09630, C. parapsilosis CDC317 : CPAR2_805080, Candida tenuis NRRL Y-1498 : CANTEDRAFT_136811 and Debaryomyces hansenii CBS767 : DEHA2B12364g
S1247	K.YYTDQANDNLFNKSS#PDESR.M	A0A1D8PES9	0.645734	0.0116266	Orf19.4893	3634880	CAALFM_C110230CA	hypothetical protein	Ortholog of C. dubliniensis CD36 : Cd36_09630, C. parapsilosis CDC317 : CPAR2_805080, Candida tenuis NRRL Y-1498 : CANTEDRAFT_136811 and Debaryomyces hansenii CBS767 : DEHA2B12364g
S1336	R.LQIDGDNVS#IIKK.Y	A0A1D8PES9	0.871331	0.0122303	Orf19.4893	3634880	CAALFM_C110230CA	hypothetical protein	Ortholog of C. dubliniensis CD36 : Cd36_09630, C. parapsilosis CDC317 : CPAR2_805080, Candida tenuis NRRL Y-1498 : CANTEDRAFT_136811 and Debaryomyces hansenii CBS767 : DEHA2B12364g
S23,S23	K.VAESS#PAIK.S	Q5AP65	-0.377972	0.0330646	Orf19.4898	3634902	CAALFM_C110280CA	hypothetical protein	Putative protein of unknown function; induced by prostaglandins
S755	R.NIFSDGRQNS#TNSLSR.F	A0A1D8PEU9	0.792509	0.000330181	Orf19.4906	3634835	CAALFM_C110350CA	hypothetical protein	Putative adhesin-like protein; positively regulated by Tbf1; Spider biofilm induced
S215:S216	R.ANS#S#DEESLQSM*ISPPSTDDVIPSEKPSSSK.M	A0A1D8PEV1	-0.830666	0.000144866	Orf19.4907	3634836	CAALFM_C110360CA	hypothetical protein	Putative protein of unknown function; Hap43p-repressed gene; increased transcription is observed upon fluphenazine treatment; possibly transcriptionally regulated by Tac1p; induced by nitric oxide; fungal-specific (no human/murine homolog
S216	R.ANSS#DEESLQSM*ISPPSTDDVIPSEKPSSSK.M	A0A1D8PEV1	-0.414851	0.00146585	Orf19.4907	3634836	CAALFM_C110360CA	hypothetical protein	Putative protein of unknown function; Hap43p-repressed gene; increased transcription is observed upon fluphenazine treatment; possibly transcriptionally regulated by Tac1p; induced by nitric oxide; fungal-specific (no human/murine homolog
S507	K.RAGS#GTSKDLAPVQSR.S	Q59NC8	-0.936371	0.00318167	Orf19.983	3647178	CAALFM_C110420CA	hypothetical protein	#N/A
S507	R.AGS#GTSKDLAPVQSR.S	Q59NC8	-0.188861	0.0496587	Orf19.983	3647178	CAALFM_C110420CA	hypothetical protein	#N/A
S498	R.NLS#PTEDHLK.Q	A0A1D8PEU5	0.774054	0.00306002	Orf19.985	3647180	CAALFM_C110440WA	hypothetical protein	Ortholog(s) have endoplasmic reticulum, ribosome localization
S370	K.IKNS#PVQRPVNGSVDDVGALDEDLNSESKEK.E	A0A1D8PEV8	-0.797475	0.0209356	Orf19.988	3647183	CAALFM_C110460WA	hypothetical protein	Protein of unknown function; oral infection upregulated gene; upregulated in strains from HIV+ patients with oral candidiasis; mutants have reduced ability to damage oral epithelial cells; transcript possibly regulated upon hyphal formation
S515	K.EIGDLKPTRVIS#GELFI.-	A0A1D8PEW0	-0.682865	0.000646542	Orf19.998	3647193	CAALFM_C110540CA	hypothetical protein	Putative adapter protein; links synaptojanins Inp52 and Inp53 to the cortical actin cytoskeleton in S. cerevisiae; mutants are viable
T347	K.KIT#GVPQNK.V	A0A1D8PEW0	-0.156233	0.0117226	Orf19.998	3647193	CAALFM_C110540CA	hypothetical protein	Putative adapter protein; links synaptojanins Inp52 and Inp53 to the cortical actin cytoskeleton in S. cerevisiae; mutants are viable
S334:S338	K.SAS#ASVS#PEKVEKK.I	A0A1D8PEW0	0.488035	0.0052428	Orf19.998	3647193	CAALFM_C110540CA	hypothetical protein	Putative adapter protein; links synaptojanins Inp52 and Inp53 to the cortical actin cytoskeleton in S. cerevisiae; mutants are viable
S192	R.S#FKDIEELIK.S	A0A1D8PEW0	0.513422	0.0269688	Orf19.998	3647193	CAALFM_C110540CA	hypothetical protein	Putative adapter protein; links synaptojanins Inp52 and Inp53 to the cortical actin cytoskeleton in S. cerevisiae; mutants are viable
T405	K.SM*T#FNNPPPEFQK.R	A0A1D8PEW0	0.700322	0.0109401	Orf19.998	3647193	CAALFM_C110540CA	hypothetical protein	Putative adapter protein; links synaptojanins Inp52 and Inp53 to the cortical actin cytoskeleton in S. cerevisiae; mutants are viable
S182	R.NTRSSS#TVQLGSLK.S	A0A1D8PEZ9	-2.45654	0.00897011	Orf19.2333	3644452	CAALFM_C110840CA	hypothetical protein	Ortholog(s) have role in retrograde transport, endosome to Golgi and cytosol, late endosome, nucleus localization
S160	R.TTTHDS#DSSSSITDRPPKKTSR.N	A0A1D8PEZ9	-2.15026	0.0001675	Orf19.2333	3644452	CAALFM_C110840CA	hypothetical protein	Ortholog(s) have role in retrograde transport, endosome to Golgi and cytosol, late endosome, nucleus localization
S160	R.TTTHDS#DSSSSITDRPPK.K	A0A1D8PEZ9	-1.70667	0.00383451	Orf19.2333	3644452	CAALFM_C110840CA	hypothetical protein	Ortholog(s) have role in retrograde transport, endosome to Golgi and cytosol, late endosome, nucleus localization
S182	R.SSS#TVQLGSLK.S	A0A1D8PEZ9	0.478081	0.000180288	Orf19.2333	3644452	CAALFM_C110840CA	hypothetical protein	Ortholog(s) have role in retrograde transport, endosome to Golgi and cytosol, late endosome, nucleus localization
T183	R.SSST#VQLGSLK.S	A0A1D8PEZ9	0.544608	0.0153262	Orf19.2333	3644452	CAALFM_C110840CA	hypothetical protein	Ortholog(s) have role in retrograde transport, endosome to Golgi and cytosol, late endosome, nucleus localization
S180	R.S#SSTVQLGSLK.S	A0A1D8PEZ9	0.560282	0.00998223	Orf19.2333	3644452	CAALFM_C110840CA	hypothetical protein	Ortholog(s) have role in retrograde transport, endosome to Golgi and cytosol, late endosome, nucleus localization
S181	R.SS#STVQLGSLK.S	A0A1D8PEZ9	0.676401	0.0225608	Orf19.2333	3644452	CAALFM_C110840CA	hypothetical protein	Ortholog(s) have role in retrograde transport, endosome to Golgi and cytosol, late endosome, nucleus localization
S180:S182	R.S#SS#TVQLGSLK.S	A0A1D8PEZ9	0.899229	0.0021723	Orf19.2333	3644452	CAALFM_C110840CA	hypothetical protein	Ortholog(s) have role in retrograde transport, endosome to Golgi and cytosol, late endosome, nucleus localization
S400	K.APS#SEEPVGPNLFVIGLKGKDNK.R	Q59WH5	-0.695346	0.00620761	Orf19.2326	3644445	CAALFM_C110910CA	hypothetical protein	Ortholog(s) have role in chromatin silencing at silent mating-type cassette, double-strand break repair via homologous recombination, intra-S DNA damage checkpoint and mitotic sister chromatid cohesion, more
S152:T154	R.SVS#IT#PPLVDRNK.I	Q59WH5	-0.468911	0.00426689	Orf19.2326	3644445	CAALFM_C110910CA	hypothetical protein	Ortholog(s) have role in chromatin silencing at silent mating-type cassette, double-strand break repair via homologous recombination, intra-S DNA damage checkpoint and mitotic sister chromatid cohesion, more
S48	K.LSRELNDS#DDSPKR.K	Q59WH5	-0.319561	0.0344618	Orf19.2326	3644445	CAALFM_C110910CA	hypothetical protein	Ortholog(s) have role in chromatin silencing at silent mating-type cassette, double-strand break repair via homologous recombination, intra-S DNA damage checkpoint and mitotic sister chromatid cohesion, more
S401	K.QPTSKAPSS#EEPVGPNLFVIGLK.G	Q59WH5	-0.2663	0.0110609	Orf19.2326	3644445	CAALFM_C110910CA	hypothetical protein	Ortholog(s) have role in chromatin silencing at silent mating-type cassette, double-strand break repair via homologous recombination, intra-S DNA damage checkpoint and mitotic sister chromatid cohesion, more
S212	K.SQTELS#PETYTFDDESEKKR.K	Q59WH5	-0.231501	0.0455179	Orf19.2326	3644445	CAALFM_C110910CA	hypothetical protein	Ortholog(s) have role in chromatin silencing at silent mating-type cassette, double-strand break repair via homologous recombination, intra-S DNA damage checkpoint and mitotic sister chromatid cohesion, more
S504	K.QTEEVANS#QEGSADKSSK.N	A0A1D8PEZ5	0.366433	0.0105256	Orf19.2319	3644427	CAALFM_C110970WA	hypothetical protein	Putative nucleolar protein with a predicted role in pre-rRNA processing; Hap43-induced gene; repressed in core stress response
S240	R.VASASNS#DAEGLGGIPVLSDFKIIKK.R	A0A1D8PF18	-2.12028	0.00202664	Orf19.2313	3644421	CAALFM_C111010CA	hypothetical protein	Putative ortholog of S. cerevisiae Pex32 a peroxisomal integral membrane protein with a role in negative regulation of peroxisome size; Hap43-repressed gene
T72:T79	R.T#ASTTTIT#PILSR.H	Q59WJ3	-0.487732	0.0157667	Orf19.2308	3644416	CAALFM_C111080WA	6-phosphofructo-2-kinase	Putative 6-phosphofructo-2-kinase; catalyzes synthesis of fructose-2,6-bisphosphate; Hap43-repressed; flow model, rat catheter and Spider biofilm induced
T335	K.KLKEVLDNLDKIPTT#GEEEEDD.-	Q59WJ7	-0.419656	0.0188386	Orf19.2304	3644412	CAALFM_C111120CA	hypothetical protein	Protein similar to S. cerevisiae Gvp36p; transposon mutation affects filamentous growth
S124	K.IKDANVS#GLIGQK.F	Q59WJ7	0.550867	0.000796585	Orf19.2304	3644412	CAALFM_C111120CA	hypothetical protein	Protein similar to S. cerevisiae Gvp36p; transposon mutation affects filamentous growth
S139	K.NVSS#PQELEK.V	Q59WJ7	0.597456	0.000954442	Orf19.2304	3644412	CAALFM_C111120CA	hypothetical protein	Protein similar to S. cerevisiae Gvp36p; transposon mutation affects filamentous growth
S37	K.TSDQLSKS#IQPYTTK.T	Q59WJ7	0.724586	0.00429367	Orf19.2304	3644412	CAALFM_C111120CA	hypothetical protein	Protein similar to S. cerevisiae Gvp36p; transposon mutation affects filamentous growth
S14:S17	-.AITNLLESQDAHS#EAS#LHAVSK.T	A0A1D8PF61	-1.18716	0.0154009	Orf19.2302	3644410	CAALFM_C111140WA	mannosylinositol phosphorylceramide synthase regulatory subunit	Ortholog(s) have enzyme regulator activity, role in cellular calcium ion homeostasis and integral component of endoplasmic reticulum membrane localization
S1620	R.TVS#GTSYNATKPINEGELPEPDLQDDVSGHDSRK.S	A0A1D8PF42	-3.21881	0.0366122	Orf19.2296	3644396	CAALFM_C111200WA	hypothetical protein	Predicted mucin-like protein; ketoconazole-induced; fluconazole-repressed; induced in cyr1 mutant; colony morphology-related gene regulation by Ssn6; flow model biofilm induced; Spider biofilm induced
T1627	R.TVSGTSYNAT#KPINEGELPEPDLQDDVSGHDSRK.S	A0A1D8PF42	-3.15894	0.0262998	Orf19.2296	3644396	CAALFM_C111200WA	hypothetical protein	Predicted mucin-like protein; ketoconazole-induced; fluconazole-repressed; induced in cyr1 mutant; colony morphology-related gene regulation by Ssn6; flow model biofilm induced; Spider biofilm induced
T1622	R.TVSGT#SYNATKPINEGELPEPDLQDDVSGHDSR.K	A0A1D8PF42	-2.53175	0.0189661	Orf19.2296	3644396	CAALFM_C111200WA	hypothetical protein	Predicted mucin-like protein; ketoconazole-induced; fluconazole-repressed; induced in cyr1 mutant; colony morphology-related gene regulation by Ssn6; flow model biofilm induced; Spider biofilm induced
S1620	R.TVS#GTSYNATKPINEGELPEPDLQDDVSGHDSR.K	A0A1D8PF42	-2.42659	0.0122071	Orf19.2296	3644396	CAALFM_C111200WA	hypothetical protein	Predicted mucin-like protein; ketoconazole-induced; fluconazole-repressed; induced in cyr1 mutant; colony morphology-related gene regulation by Ssn6; flow model biofilm induced; Spider biofilm induced
S2444	R.EYEAPSLQSESGLHTTQANKGS#PLGGLASGETNIR.G	A0A1D8PF42	-2.40782	0.0290868	Orf19.2296	3644396	CAALFM_C111200WA	hypothetical protein	Predicted mucin-like protein; ketoconazole-induced; fluconazole-repressed; induced in cyr1 mutant; colony morphology-related gene regulation by Ssn6; flow model biofilm induced; Spider biofilm induced
S2444	R.EREYEAPSLQSESGLHTTQANKGS#PLGGLASGETNIR.G	A0A1D8PF42	-2.39474	0.0218545	Orf19.2296	3644396	CAALFM_C111200WA	hypothetical protein	Predicted mucin-like protein; ketoconazole-induced; fluconazole-repressed; induced in cyr1 mutant; colony morphology-related gene regulation by Ssn6; flow model biofilm induced; Spider biofilm induced
S42	K.S#HQKVIDEAYSEGR.K	A0A1D8PF42	-2.34704	0.000103199	Orf19.2296	3644396	CAALFM_C111200WA	hypothetical protein	Predicted mucin-like protein; ketoconazole-induced; fluconazole-repressed; induced in cyr1 mutant; colony morphology-related gene regulation by Ssn6; flow model biofilm induced; Spider biofilm induced
S168	R.ENKS#TTSSVASGLSHDREVIAESSIGR.V	A0A1D8PF42	-1.78406	0.00479763	Orf19.2296	3644396	CAALFM_C111200WA	hypothetical protein	Predicted mucin-like protein; ketoconazole-induced; fluconazole-repressed; induced in cyr1 mutant; colony morphology-related gene regulation by Ssn6; flow model biofilm induced; Spider biofilm induced
S178	K.STTSSVASGLS#HDREVIAESSIGR.V	A0A1D8PF42	-1.7815	0.0159848	Orf19.2296	3644396	CAALFM_C111200WA	hypothetical protein	Predicted mucin-like protein; ketoconazole-induced; fluconazole-repressed; induced in cyr1 mutant; colony morphology-related gene regulation by Ssn6; flow model biofilm induced; Spider biofilm induced
S154	K.QGTSPSTYAGAGVGAAAGAGAGAVGASTGS#GSPKTPSTPR.E	A0A1D8PF42	-1.45946	0.04352	Orf19.2296	3644396	CAALFM_C111200WA	hypothetical protein	Predicted mucin-like protein; ketoconazole-induced; fluconazole-repressed; induced in cyr1 mutant; colony morphology-related gene regulation by Ssn6; flow model biofilm induced; Spider biofilm induced
T2114	K.KQDT#ETSTSDDEIFVNVK.G	A0A1D8PF42	-1.20689	0.0246401	Orf19.2296	3644396	CAALFM_C111200WA	hypothetical protein	Predicted mucin-like protein; ketoconazole-induced; fluconazole-repressed; induced in cyr1 mutant; colony morphology-related gene regulation by Ssn6; flow model biofilm induced; Spider biofilm induced
S753	K.TGYHDGS#KNDLSKEAYQAGK.A	A0A1D8PF42	-1.19279	0.0122827	Orf19.2296	3644396	CAALFM_C111200WA	hypothetical protein	Predicted mucin-like protein; ketoconazole-induced; fluconazole-repressed; induced in cyr1 mutant; colony morphology-related gene regulation by Ssn6; flow model biofilm induced; Spider biofilm induced
T1622	R.TVSGT#SYNATKPINEGELPEPDLQDDVSGHDSRK.S	A0A1D8PF42	-1.18854	0.0134902	Orf19.2296	3644396	CAALFM_C111200WA	hypothetical protein	Predicted mucin-like protein; ketoconazole-induced; fluconazole-repressed; induced in cyr1 mutant; colony morphology-related gene regulation by Ssn6; flow model biofilm induced; Spider biofilm induced
S172	K.STTSS#VASGLSHDREVIAESSIGR.V	A0A1D8PF42	-1.00862	0.021983	Orf19.2296	3644396	CAALFM_C111200WA	hypothetical protein	Predicted mucin-like protein; ketoconazole-induced; fluconazole-repressed; induced in cyr1 mutant; colony morphology-related gene regulation by Ssn6; flow model biofilm induced; Spider biofilm induced
S1777	K.QDVGATREISS#LDPAQNHK.S	A0A1D8PF42	-0.96265	0.0027599	Orf19.2296	3644396	CAALFM_C111200WA	hypothetical protein	Predicted mucin-like protein; ketoconazole-induced; fluconazole-repressed; induced in cyr1 mutant; colony morphology-related gene regulation by Ssn6; flow model biofilm induced; Spider biofilm induced
S154	K.QGTSPSTYAGAGVGAAAGAGAGAVGASTGS#GSPKTPSTPRENK.S	A0A1D8PF42	-0.906762	0.000529679	Orf19.2296	3644396	CAALFM_C111200WA	hypothetical protein	Predicted mucin-like protein; ketoconazole-induced; fluconazole-repressed; induced in cyr1 mutant; colony morphology-related gene regulation by Ssn6; flow model biofilm induced; Spider biofilm induced
S175	K.STTSSVAS#GLSHDREVIAESSIGR.V	A0A1D8PF42	-0.765181	0.0302937	Orf19.2296	3644396	CAALFM_C111200WA	hypothetical protein	Predicted mucin-like protein; ketoconazole-induced; fluconazole-repressed; induced in cyr1 mutant; colony morphology-related gene regulation by Ssn6; flow model biofilm induced; Spider biofilm induced
T2114	K.KQDT#ETSTSDDEIFVNVKGTKDNVLATK.I	A0A1D8PF42	-0.714646	0.012589	Orf19.2296	3644396	CAALFM_C111200WA	hypothetical protein	Predicted mucin-like protein; ketoconazole-induced; fluconazole-repressed; induced in cyr1 mutant; colony morphology-related gene regulation by Ssn6; flow model biofilm induced; Spider biofilm induced
T1455	K.SVDPVGVAEPGGVQKLPANHPT#AR.H	A0A1D8PF42	-0.639031	0.0314563	Orf19.2296	3644396	CAALFM_C111200WA	hypothetical protein	Predicted mucin-like protein; ketoconazole-induced; fluconazole-repressed; induced in cyr1 mutant; colony morphology-related gene regulation by Ssn6; flow model biofilm induced; Spider biofilm induced
S1299	K.ETTLS#HDATFDDKELVASNDRK.I	A0A1D8PF42	-0.602615	0.000794475	Orf19.2296	3644396	CAALFM_C111200WA	hypothetical protein	Predicted mucin-like protein; ketoconazole-induced; fluconazole-repressed; induced in cyr1 mutant; colony morphology-related gene regulation by Ssn6; flow model biofilm induced; Spider biofilm induced
S25	K.DTESS#PNSSSKTSAPSASASK.S	A0A1D8PF42	-0.37217	0.0026274	Orf19.2296	3644396	CAALFM_C111200WA	hypothetical protein	Predicted mucin-like protein; ketoconazole-induced; fluconazole-repressed; induced in cyr1 mutant; colony morphology-related gene regulation by Ssn6; flow model biofilm induced; Spider biofilm induced
S1777	R.EISS#LDPAQNHK.S	A0A1D8PF42	0.198608	0.0149335	Orf19.2296	3644396	CAALFM_C111200WA	hypothetical protein	Predicted mucin-like protein; ketoconazole-induced; fluconazole-repressed; induced in cyr1 mutant; colony morphology-related gene regulation by Ssn6; flow model biofilm induced; Spider biofilm induced
S2119	K.KQDTETSTS#DDEIFVNVK.G	A0A1D8PF42	0.200245	0.0220708	Orf19.2296	3644396	CAALFM_C111200WA	hypothetical protein	Predicted mucin-like protein; ketoconazole-induced; fluconazole-repressed; induced in cyr1 mutant; colony morphology-related gene regulation by Ssn6; flow model biofilm induced; Spider biofilm induced
T1151	K.RETT#LSRDATFDEK.E	A0A1D8PF42	0.329666	0.0125458	Orf19.2296	3644396	CAALFM_C111200WA	hypothetical protein	Predicted mucin-like protein; ketoconazole-induced; fluconazole-repressed; induced in cyr1 mutant; colony morphology-related gene regulation by Ssn6; flow model biofilm induced; Spider biofilm induced
S956:T960	K.ETTLS#RDAT#FDEKELVASNDRK.I	A0A1D8PF42	0.349155	0.0154109	Orf19.2296	3644396	CAALFM_C111200WA	hypothetical protein	Predicted mucin-like protein; ketoconazole-induced; fluconazole-repressed; induced in cyr1 mutant; colony morphology-related gene regulation by Ssn6; flow model biofilm induced; Spider biofilm induced
T953:T960	K.ET#TLSRDAT#FDEKELVASNDR.K	A0A1D8PF42	0.356237	0.000168999	Orf19.2296	3644396	CAALFM_C111200WA	hypothetical protein	Predicted mucin-like protein; ketoconazole-induced; fluconazole-repressed; induced in cyr1 mutant; colony morphology-related gene regulation by Ssn6; flow model biofilm induced; Spider biofilm induced
Y524	K.QDPSNASTY#AVHDEPIAAPELK.D	A0A1D8PF42	0.374305	0.0270843	Orf19.2296	3644396	CAALFM_C111200WA	hypothetical protein	Predicted mucin-like protein; ketoconazole-induced; fluconazole-repressed; induced in cyr1 mutant; colony morphology-related gene regulation by Ssn6; flow model biofilm induced; Spider biofilm induced
S2119	K.QDTETSTS#DDEIFVNVK.G	A0A1D8PF42	0.37657	0.0230806	Orf19.2296	3644396	CAALFM_C111200WA	hypothetical protein	Predicted mucin-like protein; ketoconazole-induced; fluconazole-repressed; induced in cyr1 mutant; colony morphology-related gene regulation by Ssn6; flow model biofilm induced; Spider biofilm induced
S498	K.NTSSGLGSENLAAGSAATSSQIPASSNNEKQSLS#DLEKK.I	A0A1D8PF42	0.435477	0.0374673	Orf19.2296	3644396	CAALFM_C111200WA	hypothetical protein	Predicted mucin-like protein; ketoconazole-induced; fluconazole-repressed; induced in cyr1 mutant; colony morphology-related gene regulation by Ssn6; flow model biofilm induced; Spider biofilm induced
S156	K.QGTSPSTYAGAGVGAAAGAGAGAVGASTGSGS#PKTPSTPR.E	A0A1D8PF42	0.497473	0.0310163	Orf19.2296	3644396	CAALFM_C111200WA	hypothetical protein	Predicted mucin-like protein; ketoconazole-induced; fluconazole-repressed; induced in cyr1 mutant; colony morphology-related gene regulation by Ssn6; flow model biofilm induced; Spider biofilm induced
S1462	R.HREVS#ENIKSDK.T	A0A1D8PF42	0.532766	0.00842482	Orf19.2296	3644396	CAALFM_C111200WA	hypothetical protein	Predicted mucin-like protein; ketoconazole-induced; fluconazole-repressed; induced in cyr1 mutant; colony morphology-related gene regulation by Ssn6; flow model biofilm induced; Spider biofilm induced
S347	K.GKLDGDNGAFGTS#NQSSTNFSSNSNPVEEK.E	A0A1D8PF42	0.614867	0.0146547	Orf19.2296	3644396	CAALFM_C111200WA	hypothetical protein	Predicted mucin-like protein; ketoconazole-induced; fluconazole-repressed; induced in cyr1 mutant; colony morphology-related gene regulation by Ssn6; flow model biofilm induced; Spider biofilm induced
S969	R.DATFDEKELVAS#NDRK.I	A0A1D8PF42	0.617467	0.00335307	Orf19.2296	3644396	CAALFM_C111200WA	hypothetical protein	Predicted mucin-like protein; ketoconazole-induced; fluconazole-repressed; induced in cyr1 mutant; colony morphology-related gene regulation by Ssn6; flow model biofilm induced; Spider biofilm induced
S200	R.S#REPLEHTIPGDFANEK.R	A0A1D8PF42	0.645664	0.00104641	Orf19.2296	3644396	CAALFM_C111200WA	hypothetical protein	Predicted mucin-like protein; ketoconazole-induced; fluconazole-repressed; induced in cyr1 mutant; colony morphology-related gene regulation by Ssn6; flow model biofilm induced; Spider biofilm induced
T960	R.DAT#FDEKELVASNDR.K	A0A1D8PF42	0.661906	0.0214009	Orf19.2296	3644396	CAALFM_C111200WA	hypothetical protein	Predicted mucin-like protein; ketoconazole-induced; fluconazole-repressed; induced in cyr1 mutant; colony morphology-related gene regulation by Ssn6; flow model biofilm induced; Spider biofilm induced
S956	K.ETTLS#RDATFDEK.E	A0A1D8PF42	0.678927	0.00177301	Orf19.2296	3644396	CAALFM_C111200WA	hypothetical protein	Predicted mucin-like protein; ketoconazole-induced; fluconazole-repressed; induced in cyr1 mutant; colony morphology-related gene regulation by Ssn6; flow model biofilm induced; Spider biofilm induced
S2366	K.GTAPASASATYGES#PSADYSK.S	A0A1D8PF42	0.703878	0.00459595	Orf19.2296	3644396	CAALFM_C111200WA	hypothetical protein	Predicted mucin-like protein; ketoconazole-induced; fluconazole-repressed; induced in cyr1 mutant; colony morphology-related gene regulation by Ssn6; flow model biofilm induced; Spider biofilm induced
T1424	K.ISKLPT#HKGDFNETK.S	A0A1D8PF42	0.705709	5.45145e-05	Orf19.2296	3644396	CAALFM_C111200WA	hypothetical protein	Predicted mucin-like protein; ketoconazole-induced; fluconazole-repressed; induced in cyr1 mutant; colony morphology-related gene regulation by Ssn6; flow model biofilm induced; Spider biofilm induced
S308	K.TKPS#YPEGTVEKGGDLETVK.N	A0A1D8PF42	0.726534	0.00907283	Orf19.2296	3644396	CAALFM_C111200WA	hypothetical protein	Predicted mucin-like protein; ketoconazole-induced; fluconazole-repressed; induced in cyr1 mutant; colony morphology-related gene regulation by Ssn6; flow model biofilm induced; Spider biofilm induced
T960	K.ETTLSRDAT#FDEKELVASNDR.K	A0A1D8PF42	0.749099	0.000128689	Orf19.2296	3644396	CAALFM_C111200WA	hypothetical protein	Predicted mucin-like protein; ketoconazole-induced; fluconazole-repressed; induced in cyr1 mutant; colony morphology-related gene regulation by Ssn6; flow model biofilm induced; Spider biofilm induced
T960	R.DAT#FDEKELVASNDRK.I	A0A1D8PF42	0.749954	0.000522428	Orf19.2296	3644396	CAALFM_C111200WA	hypothetical protein	Predicted mucin-like protein; ketoconazole-induced; fluconazole-repressed; induced in cyr1 mutant; colony morphology-related gene regulation by Ssn6; flow model biofilm induced; Spider biofilm induced
S1983	K.DIPSSGLSQNTS#VGSR.A	A0A1D8PF42	0.781439	0.0491509	Orf19.2296	3644396	CAALFM_C111200WA	hypothetical protein	Predicted mucin-like protein; ketoconazole-induced; fluconazole-repressed; induced in cyr1 mutant; colony morphology-related gene regulation by Ssn6; flow model biofilm induced; Spider biofilm induced
S437	K.QSSNDKS#SSKGVYDISDAQGK.D	A0A1D8PF42	0.808418	0.00131944	Orf19.2296	3644396	CAALFM_C111200WA	hypothetical protein	Predicted mucin-like protein; ketoconazole-induced; fluconazole-repressed; induced in cyr1 mutant; colony morphology-related gene regulation by Ssn6; flow model biofilm induced; Spider biofilm induced
S496	K.NTSSGLGSENLAAGSAATSSQIPASSNNEKQS#LSDLEKK.I	A0A1D8PF42	0.913312	0.00168042	Orf19.2296	3644396	CAALFM_C111200WA	hypothetical protein	Predicted mucin-like protein; ketoconazole-induced; fluconazole-repressed; induced in cyr1 mutant; colony morphology-related gene regulation by Ssn6; flow model biofilm induced; Spider biofilm induced
T954	K.KETT#LSRDATFDEK.E	A0A1D8PF42	0.932206	0.00135635	Orf19.2296	3644396	CAALFM_C111200WA	hypothetical protein	Predicted mucin-like protein; ketoconazole-induced; fluconazole-repressed; induced in cyr1 mutant; colony morphology-related gene regulation by Ssn6; flow model biofilm induced; Spider biofilm induced
Y1213	R.SATSTESNY#DSGKPYSSSAEK.Q	A0A1D8PF42	1.04654	0.000278896	Orf19.2296	3644396	CAALFM_C111200WA	hypothetical protein	Predicted mucin-like protein; ketoconazole-induced; fluconazole-repressed; induced in cyr1 mutant; colony morphology-related gene regulation by Ssn6; flow model biofilm induced; Spider biofilm induced
S82	K.GNIGSSSGSASGSGSS#VEQGGK.H	A0A1D8PF42	1.07374	0.00107639	Orf19.2296	3644396	CAALFM_C111200WA	hypothetical protein	Predicted mucin-like protein; ketoconazole-induced; fluconazole-repressed; induced in cyr1 mutant; colony morphology-related gene regulation by Ssn6; flow model biofilm induced; Spider biofilm induced
S505	K.QSLSDLEKKIS#ETDAR.I	A0A1D8PF42	1.09301	0.00603265	Orf19.2296	3644396	CAALFM_C111200WA	hypothetical protein	Predicted mucin-like protein; ketoconazole-induced; fluconazole-repressed; induced in cyr1 mutant; colony morphology-related gene regulation by Ssn6; flow model biofilm induced; Spider biofilm induced
S1211	R.SATSTES#NYDSGKPYSSSAEK.Q	A0A1D8PF42	1.19276	0.0445061	Orf19.2296	3644396	CAALFM_C111200WA	hypothetical protein	Predicted mucin-like protein; ketoconazole-induced; fluconazole-repressed; induced in cyr1 mutant; colony morphology-related gene regulation by Ssn6; flow model biofilm induced; Spider biofilm induced
S75	K.GNIGSSSGS#ASGSGSSVEQGGK.H	A0A1D8PF42	1.26889	0.000442708	Orf19.2296	3644396	CAALFM_C111200WA	hypothetical protein	Predicted mucin-like protein; ketoconazole-induced; fluconazole-repressed; induced in cyr1 mutant; colony morphology-related gene regulation by Ssn6; flow model biofilm induced; Spider biofilm induced
S664	K.DIYAGIDKNS#TK.H	A0A1D8PF42	1.46328	0.000850417	Orf19.2296	3644396	CAALFM_C111200WA	hypothetical protein	Predicted mucin-like protein; ketoconazole-induced; fluconazole-repressed; induced in cyr1 mutant; colony morphology-related gene regulation by Ssn6; flow model biofilm induced; Spider biofilm induced
S883	K.QSGDTSAS#TDSETSSPSK.G	A0A1D8PF42	1.78415	0.00541895	Orf19.2296	3644396	CAALFM_C111200WA	hypothetical protein	Predicted mucin-like protein; ketoconazole-induced; fluconazole-repressed; induced in cyr1 mutant; colony morphology-related gene regulation by Ssn6; flow model biofilm induced; Spider biofilm induced
S498	K.QSLS#DLEK.K	A0A1D8PF42	1.93372	0.00551797	Orf19.2296	3644396	CAALFM_C111200WA	hypothetical protein	Predicted mucin-like protein; ketoconazole-induced; fluconazole-repressed; induced in cyr1 mutant; colony morphology-related gene regulation by Ssn6; flow model biofilm induced; Spider biofilm induced
S357:S358,S357:S358	K.M*VYKREEPYLTNLLVDYS#S#DEDDD.-	Q59W50	-0.894605	0.0317732	Orf19.674	3644554	CAALFM_C111280WA	hypothetical protein	Ortholog(s) have U6 snRNA binding, pre-mRNA binding activity and role in mRNA cis splicing, via spliceosome, spliceosomal snRNP assembly
S15	R.FKSAEES#LDEDESVTPVYIPK.A	A0A1D8PF71	-0.678536	0.00128146	Orf19.672	3644552	CAALFM_C111300CA	mRNA splicing protein	Ortholog(s) have RNA binding, first spliceosomal transesterification activity, role in mRNA 5'-splice site recognition and U5 snRNP localization
S15	K.SAEES#LDEDESVTPVYIPK.A	A0A1D8PF71	-0.471233	0.032168	Orf19.672	3644552	CAALFM_C111300CA	mRNA splicing protein	Ortholog(s) have RNA binding, first spliceosomal transesterification activity, role in mRNA 5'-splice site recognition and U5 snRNP localization
S66	R.RGS#GCGYQSSSPR.-	A0A1D8PF49	0.327806	0.00331876	0	30515052	CAALFM_C111320CA	hypothetical protein	#N/A
T264	R.APLLVEVQETVT#E.-	A0A1D8PF63	-0.575268	0.0453156	Orf19.1152	3645338	CAALFM_C111670WA	hypothetical protein	Protein of unknown function; induced in core stress response; Gcn2 and Gcn4 regulated; flow model biofilm induced; Spider biofilm induced
T150	R.NNSIT#KSLNQTLLNDSSLDEFDYVAHIR.K	Q59TU4	-2.28853	0.00117903	Orf19.1150	3645322	CAALFM_C111690WA	hypothetical protein	GATA-like transcription factor; oral infection induced; mutant has reduced capacity to damage oral epithelial cells; regulated by Gcn2 and Gcn4; Spider biofilm induced
S665	R.S#M*M*VDTPTPK.A	A0A1D8PF82	0.35067	0.00222659	Orf19.1144	3645318	CAALFM_C111730WA	hypothetical protein	Protein with SEL-1 like protein domain; early-stage flow model biofilm induced
S680	K.RSS#VPVYTSQQK.Q	A0A1D8PF82	1.00634	0.000506821	Orf19.1144	3645318	CAALFM_C111730WA	hypothetical protein	Protein with SEL-1 like protein domain; early-stage flow model biofilm induced
S505	R.KNQSVAVNNTS#PVSIPAQQPTPVQDNIVSGTK.N	A0A1D8PF76	-0.317258	0.0113059	Orf19.1139	3645327	CAALFM_C111770CA	hypothetical protein	Protein of unknown funtion; S. cerevisiae ortholog Svl3 plays a role in endocytosis and is localized to the bud neck; Spider biofilm induced
S532	K.NVNRDS#VM*TSDGFQDYK.H	A0A1D8PF76	1.06859	0.0010515	Orf19.1139	3645327	CAALFM_C111770CA	hypothetical protein	Protein of unknown funtion; S. cerevisiae ortholog Svl3 plays a role in endocytosis and is localized to the bud neck; Spider biofilm induced
S532:T535	K.NVNRDS#VM*T#SDGFQDYK.H	A0A1D8PF76	1.2574	0.00032057	Orf19.1139	3645327	CAALFM_C111770CA	hypothetical protein	Protein of unknown funtion; S. cerevisiae ortholog Svl3 plays a role in endocytosis and is localized to the bud neck; Spider biofilm induced
S84:S87	R.SS#TAS#PVPTPVQQTTPKPTNGIK.S	A0A1D8PF90	-0.224207	0.0212757	Orf19.5281	3642009	CAALFM_C111860WA	hypothetical protein	Predicted essential RNA-binding G protein; ortholog an effector of mating response pathway in S. cerevisiae; mainly associated with nuclear envelope and ER; flow model and Spider biofilm repressed
T226:T231	K.IEIGDQVEGEDT#GDDGT#EEDEDEEEDIFAK.T	A0A1D8PF90	-0.149446	0.0216316	Orf19.5281	3642009	CAALFM_C111860WA	hypothetical protein	Predicted essential RNA-binding G protein; ortholog an effector of mating response pathway in S. cerevisiae; mainly associated with nuclear envelope and ER; flow model and Spider biofilm repressed
S333	K.SDS#PIKKPSATK.H	Q5A3J5	0.295011	0.00964082	Orf19.5275	3642003	CAALFM_C111920WA	hypothetical protein	Ortholog(s) have ATPase activator activity, role in late endosome to vacuole transport via multivesicular body sorting pathway, positive regulation of protein oligomerization and endosome membrane, multivesicular body localization
S251	K.FIEEKDEHS#PQLPR.A	Q5A3J5	0.439706	0.000807966	Orf19.5275	3642003	CAALFM_C111920WA	hypothetical protein	Ortholog(s) have ATPase activator activity, role in late endosome to vacuole transport via multivesicular body sorting pathway, positive regulation of protein oligomerization and endosome membrane, multivesicular body localization
S431	R.GIKGAVTSLSSPVTSTGS#PR.F	A0A1D8PF97	-2.24938	0.000274094	Orf19.5274	3642002	CAALFM_C111930WA	hypothetical protein	Ortholog(s) have cellular bud neck, cellular bud tip, cytoplasm localization
S424	R.GIKGAVTSLSS#PVTSTGSPR.F	A0A1D8PF97	-2.20251	0.0132707	Orf19.5274	3642002	CAALFM_C111930WA	hypothetical protein	Ortholog(s) have cellular bud neck, cellular bud tip, cytoplasm localization
S709	K.YISS#PNSSQNHIHR.I	A0A1D8PF97	-1.99589	0.024118	Orf19.5274	3642002	CAALFM_C111930WA	hypothetical protein	Ortholog(s) have cellular bud neck, cellular bud tip, cytoplasm localization
S568	K.LHDNIYPKDDDGLFS#DDDDDDDLAKVDVR.K	A0A1D8PF97	-0.903789	0.0468443	Orf19.5274	3642002	CAALFM_C111930WA	hypothetical protein	Ortholog(s) have cellular bud neck, cellular bud tip, cytoplasm localization
S648	R.RAPYPNNSDNES#DDDSPPPPVPSHDQK.Y	A0A1D8PF97	-0.705116	0.0239219	Orf19.5274	3642002	CAALFM_C111930WA	hypothetical protein	Ortholog(s) have cellular bud neck, cellular bud tip, cytoplasm localization
S644:S648	R.APYPNNS#DNES#DDDSPPPPVPSHDQK.Y	A0A1D8PF97	-0.670862	0.0153783	Orf19.5274	3642002	CAALFM_C111930WA	hypothetical protein	Ortholog(s) have cellular bud neck, cellular bud tip, cytoplasm localization
S644	R.APYPNNS#DNESDDDSPPPPVPSHDQK.Y	A0A1D8PF97	-0.475593	0.018528	Orf19.5274	3642002	CAALFM_C111930WA	hypothetical protein	Ortholog(s) have cellular bud neck, cellular bud tip, cytoplasm localization
S722	R.IHS#PEKGSPLGR.A	A0A1D8PF97	-0.411664	0.0118416	Orf19.5274	3642002	CAALFM_C111930WA	hypothetical protein	Ortholog(s) have cellular bud neck, cellular bud tip, cytoplasm localization
S536	K.TPSDNYTDRNILLNGS#HEHLM*EDELPAGIQQM*K.L	A0A1D8PF97	-0.338311	0.0422052	Orf19.5274	3642002	CAALFM_C111930WA	hypothetical protein	Ortholog(s) have cellular bud neck, cellular bud tip, cytoplasm localization
S727	R.IHSPEKGS#PLGR.A	A0A1D8PF97	-0.309406	0.0319138	Orf19.5274	3642002	CAALFM_C111930WA	hypothetical protein	Ortholog(s) have cellular bud neck, cellular bud tip, cytoplasm localization
S644:S648	R.RAPYPNNS#DNES#DDDSPPPPVPSHDQK.Y	A0A1D8PF97	-0.288339	0.000787726	Orf19.5274	3642002	CAALFM_C111930WA	hypothetical protein	Ortholog(s) have cellular bud neck, cellular bud tip, cytoplasm localization
S568	K.DDDGLFS#DDDDDDDLAK.V	A0A1D8PF97	0.604958	0.0176324	Orf19.5274	3642002	CAALFM_C111930WA	hypothetical protein	Ortholog(s) have cellular bud neck, cellular bud tip, cytoplasm localization
S739	R.ANVQYPIS#PERLTDVHK.S	A0A1D8PF97	0.649529	0.0172015	Orf19.5274	3642002	CAALFM_C111930WA	hypothetical protein	Ortholog(s) have cellular bud neck, cellular bud tip, cytoplasm localization
S810	R.QQQLYS#PQQVQQQK.Y	A0A1D8PF97	0.72669	0.00669593	Orf19.5274	3642002	CAALFM_C111930WA	hypothetical protein	Ortholog(s) have cellular bud neck, cellular bud tip, cytoplasm localization
S51:S52	R.KTVLSAS#S#PLKPQLR.R	Q5A3J9	0.416316	0.00868357	Orf19.5271	3642046	CAALFM_C111940CA	hypothetical protein	Protein of unknown function; Hap43-induced gene
S108	K.SVSTS#PTTGIK.S	Q5A3K1	0.240159	0.00998568	Orf19.5269	3642044	CAALFM_C111970CA	hypothetical protein	Ortholog of C. dubliniensis CD36 : Cd36_11210, C. parapsilosis CDC317 : CPAR2_805180, Candida tenuis NRRL Y-1498 : CANTEDRAFT_116279 and Debaryomyces hansenii CBS767 : DEHA2B10714g
S110:T122	K.ENSSRFIPKKVLLM*S#GGDWSAVEELIT#NFK.S	A0A1D8PFB2	-3.10223	7.08615e-06	Orf19.5258	3642025	CAALFM_C112070CA	hypothetical protein	Protein of unknown function; induced by nitric oxide
S439	K.ASSFKM*TS#SM*TVDEIPFIFK.F	Q5A3N2	-1.37954	0.000452058	Orf19.5238	3642022	CAALFM_C112250CA	hypothetical protein	Ortholog(s) have cytosol, nucleus localization
S434	K.ASS#FKM*TSSM*TVDEIPFIFK.F	Q5A3N2	0.16277	0.00471882	Orf19.5238	3642022	CAALFM_C112250CA	hypothetical protein	Ortholog(s) have cytosol, nucleus localization
S440	K.M*TSS#M*TVDEIPFIFK.F	Q5A3N2	0.629781	0.00246051	Orf19.5238	3642022	CAALFM_C112250CA	hypothetical protein	Ortholog(s) have cytosol, nucleus localization
T442	K.M*TSSM*T#VDEIPFIFK.F	Q5A3N2	0.817748	0.0195726	Orf19.5238	3642022	CAALFM_C112250CA	hypothetical protein	Ortholog(s) have cytosol, nucleus localization
S52	R.RSTENGTLHAAQLAVSQVS#PK.G	A0A1D8PFF0	-0.811966	0.000680412	Orf19.5225	3642059	CAALFM_C112400CA	hypothetical protein	Ortholog of Candida albicans WO-1 : CAWG_00201
S20	K.RKPPPPVS#PPQELNSHTGLPR.R	A0A1D8PFF0	-0.334304	0.00942363	Orf19.5225	3642059	CAALFM_C112400CA	hypothetical protein	Ortholog of Candida albicans WO-1 : CAWG_00201
S62	R.S#SFTKEDGSKIDPNK.M	A0A1D8PFF0	0.393442	0.0475088	Orf19.5225	3642059	CAALFM_C112400CA	hypothetical protein	Ortholog of Candida albicans WO-1 : CAWG_00201
S63	R.SS#FTKEDGSKIDPNK.M	A0A1D8PFF0	0.618502	0.00867951	Orf19.5225	3642059	CAALFM_C112400CA	hypothetical protein	Ortholog of Candida albicans WO-1 : CAWG_00201
S411	K.KADS#FDQHTVPKGNTLVR.Q	A0A1D8PFD7	-0.897109	0.0113031	Orf19.5221	3642013	CAALFM_C112430WA	hypothetical protein	Ortholog(s) have phosphatidylinositol-4,5-bisphosphate binding activity
S411	K.ADS#FDQHTVPKGNTLVR.Q	A0A1D8PFD7	-0.723927	0.00196026	Orf19.5221	3642013	CAALFM_C112430WA	hypothetical protein	Ortholog(s) have phosphatidylinositol-4,5-bisphosphate binding activity
S299	K.KTEENSDVITIDS#DFGVPVNSR.G	A0A1D8PFD7	-0.57941	0.0316271	Orf19.5221	3642013	CAALFM_C112430WA	hypothetical protein	Ortholog(s) have phosphatidylinositol-4,5-bisphosphate binding activity
S87	R.YDDTYSSQPSFSTS#PAKATK.K	A0A1D8PFD7	-0.471469	0.0179814	Orf19.5221	3642013	CAALFM_C112430WA	hypothetical protein	Ortholog(s) have phosphatidylinositol-4,5-bisphosphate binding activity
S53	R.TPFSES#PPITFEIAR.H	A0A1D8PFD7	-0.298812	0.00229912	Orf19.5221	3642013	CAALFM_C112430WA	hypothetical protein	Ortholog(s) have phosphatidylinositol-4,5-bisphosphate binding activity
S411	K.ADS#FDQHTVPK.G	A0A1D8PFD7	0.208694	0.0387016	Orf19.5221	3642013	CAALFM_C112430WA	hypothetical protein	Ortholog(s) have phosphatidylinositol-4,5-bisphosphate binding activity
S393:S396	R.TS#NVS#EFDTQK.S	A0A1D8PFD7	0.55522	0.0104662	Orf19.5221	3642013	CAALFM_C112430WA	hypothetical protein	Ortholog(s) have phosphatidylinositol-4,5-bisphosphate binding activity
S13	R.KRGEIIGGS#PAPNRGPIGSIPAR.A	Q59M28	-0.634787	0.0115327	Orf19.3759	3647604	CAALFM_C112570CA	Elongator subunit	Putative elongator complex subunit; for modification of wobble nucleosides in tRNA; Spider biofilm induced
S68,S68	K.ITSLESIS#PPTKK.L	Q59PD3	0.575526	0.0134691	Orf19.6360	3646838	CAALFM_C112630CA	U2-type spliceosomal complex subunit	Protein involved in pre-mRNA splicing; Spider biofilm induced
T165	K.LLKNDNNT#RTPTPNPNSTISSNSSVILPPSKK.S	A0A1D8PFG3	-1.67104	9.37459e-05	Orf19.6351	3646822	CAALFM_C112710CA	hypothetical protein	Ortholog of C. dubliniensis CD36 : Cd36_11880, Candida tenuis NRRL Y-1498 : cten_CGOB_00231, Debaryomyces hansenii CBS767 : DEHA2D04928g and Pichia stipitis Pignal : PICST_29234
T206	R.KPPKPTVT#PVRK.M	A0A1D8PFG3	-0.516216	0.0218972	Orf19.6351	3646822	CAALFM_C112710CA	hypothetical protein	Ortholog of C. dubliniensis CD36 : Cd36_11880, Candida tenuis NRRL Y-1498 : cten_CGOB_00231, Debaryomyces hansenii CBS767 : DEHA2D04928g and Pichia stipitis Pignal : PICST_29234
S428	K.NISIDNGNS#NEELNFNKTVSGGKPR.S	A0A1D8PFG3	-0.452508	0.00940859	Orf19.6351	3646822	CAALFM_C112710CA	hypothetical protein	Ortholog of C. dubliniensis CD36 : Cd36_11880, Candida tenuis NRRL Y-1498 : cten_CGOB_00231, Debaryomyces hansenii CBS767 : DEHA2D04928g and Pichia stipitis Pignal : PICST_29234
S218	K.RPPS#ATNTPEIKPK.E	A0A1D8PFG3	-0.35598	0.0332724	Orf19.6351	3646822	CAALFM_C112710CA	hypothetical protein	Ortholog of C. dubliniensis CD36 : Cd36_11880, Candida tenuis NRRL Y-1498 : cten_CGOB_00231, Debaryomyces hansenii CBS767 : DEHA2D04928g and Pichia stipitis Pignal : PICST_29234
S427	R.S#NSVKSDNIKVGVR.Q	A0A1D8PFI5	-1.51532	0.000768696	Orf19.6348	3646819	CAALFM_C112740WA	hypothetical protein	Predicted cysteine proteinase domain; mutants are viable
T405	R.VITT#PM*SNKYEFETIENIDDKTR.L	A0A1D8PFI5	-0.659274	0.00698001	Orf19.6348	3646819	CAALFM_C112740WA	hypothetical protein	Predicted cysteine proteinase domain; mutants are viable
S753	K.DGNSSFTLS#PQFRR.N	A0A1D8PFI5	0.341036	0.00766593	Orf19.6348	3646819	CAALFM_C112740WA	hypothetical protein	Predicted cysteine proteinase domain; mutants are viable
S863	K.LTTS#PSVKIDSTESVGELNK.Q	A0A1D8PFI5	0.512101	0.0360841	Orf19.6348	3646819	CAALFM_C112740WA	hypothetical protein	Predicted cysteine proteinase domain; mutants are viable
S753	K.DGNSSFTLS#PQFR.R	A0A1D8PFI5	0.539264	0.0107492	Orf19.6348	3646819	CAALFM_C112740WA	hypothetical protein	Predicted cysteine proteinase domain; mutants are viable
S429	R.SNS#VKSDNIK.V	A0A1D8PFI5	0.720622	0.000957732	Orf19.6348	3646819	CAALFM_C112740WA	hypothetical protein	Predicted cysteine proteinase domain; mutants are viable
S749:T751	K.LKDGNSS#FT#LSPQFRR.N	A0A1D8PFI5	0.774605	0.000989588	Orf19.6348	3646819	CAALFM_C112740WA	hypothetical protein	Predicted cysteine proteinase domain; mutants are viable
S753	K.LKDGNSSFTLS#PQFR.R	A0A1D8PFI5	1.25299	0.000150193	Orf19.6348	3646819	CAALFM_C112740WA	hypothetical protein	Predicted cysteine proteinase domain; mutants are viable
S429:S432	R.LRSNS#VKS#DNIK.V	A0A1D8PFI5	1.53934	6.34584e-05	Orf19.6348	3646819	CAALFM_C112740WA	hypothetical protein	Predicted cysteine proteinase domain; mutants are viable
S878	K.NSTSSNQSSPATSTNTS#IVDVPIEK.S	A0A1D8PFH9	0.267544	0.0372206	Orf19.4913	3636176	CAALFM_C112830CA	hypothetical protein	Ortholog(s) have ubiquitin binding activity and cytoplasm localization
T429	K.ENTM*T#M*DSNINR.L	Q5AKX4	-1.76538	0.0102641	Orf19.5003	3636191	CAALFM_C113650CA	hypothetical protein	Ortholog(s) have GTPase regulator activity and cytoplasm, nuclear envelope localization
S559	R.LLIGENTTNLVYSS#PPTSNLM*SR.S	A0A1D8PFT1	0.621768	0.00490329	Orf19.5022	3636129	CAALFM_C113840WA	divalent metal ion transporter	Ortholog(s) have inorganic cation transmembrane transporter activity and role in cellular cobalt ion homeostasis, cellular manganese ion homeostasis, cobalt ion transport, manganese ion transport
S270:S272	K.KFKPS#AS#PM*GNTSGIPSHLSNNYR.H	Q5AKV1	-1.62593	0.00749523	Orf19.5026	3636133	CAALFM_C113880CA	hypothetical protein	C2H2 transcription factor; Spider biofilm induced
S294	R.HASYS#AASGPCYSSFK.E	Q5AKV1	-1.25842	0.00288841	Orf19.5026	3636133	CAALFM_C113880CA	hypothetical protein	C2H2 transcription factor; Spider biofilm induced
S261	R.VKSQHQQQQQPTPDS#PQLKK.F	Q5AKV1	-1.15855	0.0368228	Orf19.5026	3636133	CAALFM_C113880CA	hypothetical protein	C2H2 transcription factor; Spider biofilm induced
S261	K.SQHQQQQQPTPDS#PQLK.K	Q5AKV1	-0.730779	0.044566	Orf19.5026	3636133	CAALFM_C113880CA	hypothetical protein	C2H2 transcription factor; Spider biofilm induced
S261	K.SQHQQQQQPTPDS#PQLKK.F	Q5AKV1	-0.444357	0.0181191	Orf19.5026	3636133	CAALFM_C113880CA	hypothetical protein	C2H2 transcription factor; Spider biofilm induced
S362	K.S#IKNLHDFFTDNLK.V	Q5AKV1	0.469234	0.000124155	Orf19.5026	3636133	CAALFM_C113880CA	hypothetical protein	C2H2 transcription factor; Spider biofilm induced
S7,S7	R.IIHS#EDDDDDDVGSQSSSSLSSPSK.S	Q5AKU4	-1.19078	0.00197706	Orf19.5033	3636186	CAALFM_C113950CA	hypothetical protein	Ortholog(s) have Atg8 ligase activity, enzyme activator activity, protein tag activity and role in C-terminal protein lipidation, CVT pathway, autophagosome assembly, late nucleophagy, mitophagy, piecemeal microautophagy of nucleus
S707	R.NSKEHS#PGAGAGVSR.R	A0A1D8PFU6	-1.1298	0.000547503	Orf19.7212	3643342	CAALFM_C114040WA	hypothetical protein	Phosphorylated protein; homozygous transposon insertion causes decreased colony wrinkling in filamentous growth-inducing conditions, but does not block hyphal formation in liquid media; Hap43-repressed
S357	K.FGQRQS#EEFAQK.T	A0A1D8PFV8	1.08055	0.000280507	Orf19.7214	3643344	CAALFM_C114060WA	17-beta-hydroxysteroid dehydrogenase-like protein	Glucan 1,3-beta-glucosidase; regulated by Nrg1, Tup1 and possibly Tac1; induced by NO and during cell wall regeneration; stationary phase enriched; possibly essential (UAU1 method); F-12/CO2 early biofilm induced; flow biofilm repressed
S535	K.QSNQTENGDDKM*DVDES#SNENDDNTSKLPVSVK.E	A0A1D8PFW3	1.02759	0.00699105	Orf19.7234	3643306	CAALFM_C114240WA	hypothetical protein	Putative RSC chromatin remodeling complex component; possibly an essential gene, disruptants not obtained by UAU1 method
S863	K.ESES#PDATNNNHHSQLEGVK.I	A0A1D8PFX9	-1.72024	0.0160244	Orf19.7235	3643307	CAALFM_C114250CA	hypothetical protein	Putative protein of unknown function; mutation confers hypersensitivity to amphotericin B
S728:S730	R.APS#LS#PVRQSENSK.S	A0A1D8PFX9	-0.455511	0.0133643	Orf19.7235	3643307	CAALFM_C114250CA	hypothetical protein	Putative protein of unknown function; mutation confers hypersensitivity to amphotericin B
S728:S730	R.IRAPS#LS#PVRQSENSK.S	A0A1D8PFX9	0.450232	0.0118579	Orf19.7235	3643307	CAALFM_C114250CA	hypothetical protein	Putative protein of unknown function; mutation confers hypersensitivity to amphotericin B
S700	K.NCNDIQS#ITQSEK.T	A0A1D8PFX9	0.477492	0.0372984	Orf19.7235	3643307	CAALFM_C114250CA	hypothetical protein	Putative protein of unknown function; mutation confers hypersensitivity to amphotericin B
S55	R.ANFAEVTDPKLNAKPQSS#PLLSSTPPSVSK.A	Q5ACV4	-0.693107	0.000788568	Orf19.2113	3638904	CAALFM_C200190CA	peroxisome biogenesis protein	Putative integral peroxisomal membrane protein; Hap43p-repressed gene
S54	R.ANFAEVTDPKLNAKPQS#SPLLSSTPPSVSK.A	Q5ACV4	-0.535025	0.00399512	Orf19.2113	3638904	CAALFM_C200190CA	peroxisome biogenesis protein	Putative integral peroxisomal membrane protein; Hap43p-repressed gene
S55	K.LNAKPQSS#PLLSSTPPSVSK.A	Q5ACV4	0.251377	0.0419414	Orf19.2113	3638904	CAALFM_C200190CA	peroxisome biogenesis protein	Putative integral peroxisomal membrane protein; Hap43p-repressed gene
S66,S66	K.SSS#DDAAAVEVVSQK.S	Q5ACW2	0.246929	0.0340712	Orf19.2105	3638802	CAALFM_C200280CA	U2-type spliceosomal complex subunit	Putative pre-mRNA-splicing factor; possibly an essential gene, disruptants not obtained by UAU1 method
S60	R.EGSIFTFNPS#LCLPDAKEVNTSK.R	A0A1D8PG26	-0.662411	0.000584932	Orf19.2095	3638825	CAALFM_C200360CA	hypothetical protein	Ortholog(s) have role in negative regulation of transcription from RNA polymerase II promoter in response to iron and cytosol, nucleus localization
S43	R.NSTPGS#GSGCTSREGSIFTFNPSLCLPDAK.E	A0A1D8PG26	0.419092	0.00907055	Orf19.2095	3638825	CAALFM_C200360CA	hypothetical protein	Ortholog(s) have role in negative regulation of transcription from RNA polymerase II promoter in response to iron and cytosol, nucleus localization
T56	R.EGSIFT#FNPSLCLPDAK.E	A0A1D8PG26	0.425948	0.011737	Orf19.2095	3638825	CAALFM_C200360CA	hypothetical protein	Ortholog(s) have role in negative regulation of transcription from RNA polymerase II promoter in response to iron and cytosol, nucleus localization
S2	-.S#PKKSYSLETELVLNK.S	Q5ACX5	-2.20149	0.000448291	Orf19.2092	3638822	CAALFM_C200390CA	cystathionine beta-lyase	Putative peroxisomal cystathionine beta-lyase; Gcn4p-regulated
S408:S409	K.QTVRDEDVDHS#S#DEEGYIPINKEM*QR.R	A0A1D8PG31	-0.680365	0.0234843	Orf19.2090	3638820	CAALFM_C200410CA	ATP-dependent RNA helicase	Ortholog of S. cerevisiae Ecm16, an essential DEAH-box ATP-dependent RNA helicase specific to the U3 snoRNP required for 18S rRNA synthesis; Hap43-induced; Spider biofilm induced
S176	R.EVLYEERDVKDYDDS#DEDGSIFK.S	A0A1D8PG31	-0.15834	0.0303617	Orf19.2090	3638820	CAALFM_C200410CA	ATP-dependent RNA helicase	Ortholog of S. cerevisiae Ecm16, an essential DEAH-box ATP-dependent RNA helicase specific to the U3 snoRNP required for 18S rRNA synthesis; Hap43-induced; Spider biofilm induced
S176	R.DVKDYDDS#DEDGSIFK.S	A0A1D8PG31	0.513513	0.0238732	Orf19.2090	3638820	CAALFM_C200410CA	ATP-dependent RNA helicase	Ortholog of S. cerevisiae Ecm16, an essential DEAH-box ATP-dependent RNA helicase specific to the U3 snoRNP required for 18S rRNA synthesis; Hap43-induced; Spider biofilm induced
S128	R.RRS#GTM*PTVISPQEDFLNLKTDYNLESK.S	Q5ACZ4	-0.893743	0.0376746	Orf19.2073	3638865	CAALFM_C200540WA	hypothetical protein	Protein with a multidrug and toxin extrusion protein domain; induced by Mnl1 under weak acid stress
S115:S116	R.ISAASSPAGS#S#DEDDLELGR.R	Q5ACZ4	-0.48486	0.0176144	Orf19.2073	3638865	CAALFM_C200540WA	hypothetical protein	Protein with a multidrug and toxin extrusion protein domain; induced by Mnl1 under weak acid stress
S128	R.S#GTM*PTVISPQEDFLNLKTDYNLESK.S	Q5ACZ4	-0.458766	0.037171	Orf19.2073	3638865	CAALFM_C200540WA	hypothetical protein	Protein with a multidrug and toxin extrusion protein domain; induced by Mnl1 under weak acid stress
S238	K.DSSSENTLETLS#PIANR.I	A0A1D8PG45	-1.34281	0.00491493	Orf19.2070	3638853	CAALFM_C200570WA	hypothetical protein	Ortholog(s) have DNA translocase activity, role in chromatin remodeling, nucleosome disassembly, transcription elongation from RNA polymerase II promoter and RSC complex localization
S44	R.SLPYYNNS#DSEADSDDPIVAELM*K.L	A0A1D8PG77	-0.490372	0.0252279	Orf19.2051	3638913	CAALFM_C200730CA	hypothetical protein	Ortholog of C. dubliniensis CD36 : Cd36_15670, C. parapsilosis CDC317 : CPAR2_213100, Candida tenuis NRRL Y-1498 : CANTEDRAFT_135034 and Debaryomyces hansenii CBS767 : DEHA2E14960g
S532	R.QQS#IGGTSIFL.-	Q5AD17	0.766412	0.0073517	Orf19.2050	3638912	CAALFM_C200740CA	hypothetical protein	Ortholog(s) have sterol esterase activity, role in cellular lipid metabolic process, sterol metabolic process and fungal-type vacuole, integral component of membrane, lipid particle localization
S537	R.QQSIGGTS#IFL.-	Q5AD17	0.776724	0.00600439	Orf19.2050	3638912	CAALFM_C200740CA	hypothetical protein	Ortholog(s) have sterol esterase activity, role in cellular lipid metabolic process, sterol metabolic process and fungal-type vacuole, integral component of membrane, lipid particle localization
S466	R.LFRQS#EDTK.F	Q5AD17	1.48498	0.000492994	Orf19.2050	3638912	CAALFM_C200740CA	hypothetical protein	Ortholog(s) have sterol esterase activity, role in cellular lipid metabolic process, sterol metabolic process and fungal-type vacuole, integral component of membrane, lipid particle localization
S41	K.TILDFDSNQS#YIEEEDR.T	Q5AD22	-2.24652	0.00921923	Orf19.2045	3638907	CAALFM_C200790CA	diacylglycerol kinase	Ortholog(s) have diacylglycerol kinase activity, role in phosphatidic acid biosynthetic process and integral component of endoplasmic reticulum membrane localization
S41	K.KTILDFDSNQS#YIEEEDR.T	Q5AD22	0.274973	0.0144042	Orf19.2045	3638907	CAALFM_C200790CA	diacylglycerol kinase	Ortholog(s) have diacylglycerol kinase activity, role in phosphatidic acid biosynthetic process and integral component of endoplasmic reticulum membrane localization
S100	K.VANS#TTDFSK.D	Q5AD22	0.324369	0.0122825	Orf19.2045	3638907	CAALFM_C200790CA	diacylglycerol kinase	Ortholog(s) have diacylglycerol kinase activity, role in phosphatidic acid biosynthetic process and integral component of endoplasmic reticulum membrane localization
S8	K.LS#QSSAESSPVKK.S	A0A1D8PG88	-0.550584	0.00777323	Orf19.2041	3638808	CAALFM_C200830CA	hypothetical protein	Ortholog(s) have DNA translocase activity, lysine-acetylated histone binding activity and role in ATP-dependent chromatin remodeling, nucleosome disassembly, transcription elongation from RNA polymerase II promoter
S8	K.RKLS#QSSAESSPVKK.S	A0A1D8PG88	-0.537937	0.00701186	Orf19.2041	3638808	CAALFM_C200830CA	hypothetical protein	Ortholog(s) have DNA translocase activity, lysine-acetylated histone binding activity and role in ATP-dependent chromatin remodeling, nucleosome disassembly, transcription elongation from RNA polymerase II promoter
S8	R.KLS#QSSAESSPVKK.S	A0A1D8PG88	-0.394263	0.0223124	Orf19.2041	3638808	CAALFM_C200830CA	hypothetical protein	Ortholog(s) have DNA translocase activity, lysine-acetylated histone binding activity and role in ATP-dependent chromatin remodeling, nucleosome disassembly, transcription elongation from RNA polymerase II promoter
S10	K.RKLSQS#SAESSPVKK.S	A0A1D8PG88	-0.390637	0.000665121	Orf19.2041	3638808	CAALFM_C200830CA	hypothetical protein	Ortholog(s) have DNA translocase activity, lysine-acetylated histone binding activity and role in ATP-dependent chromatin remodeling, nucleosome disassembly, transcription elongation from RNA polymerase II promoter
S11	R.KLSQSS#AESSPVK.K	A0A1D8PG88	0.352041	0.00172114	Orf19.2041	3638808	CAALFM_C200830CA	hypothetical protein	Ortholog(s) have DNA translocase activity, lysine-acetylated histone binding activity and role in ATP-dependent chromatin remodeling, nucleosome disassembly, transcription elongation from RNA polymerase II promoter
S145	K.IQSS#VPLYIKF.-	Q5AD30	0.622895	0.0317399	Orf19.2037	3638804	CAALFM_C200870WA	hypothetical protein	Ortholog of C. dubliniensis CD36 : Cd36_15810, C. parapsilosis CDC317 : CPAR2_212950, Candida tenuis NRRL Y-1498 : CANTEDRAFT_116162 and Debaryomyces hansenii CBS767 : DEHA2D18392g
Y132	K.ENQILTANDLPSY#DDIVGSSEGTTEHR.D	Q5AD37	-1.0922	0.0255589	Orf19.2030	3638891	CAALFM_C200940WA	hypothetical protein	Plasma membrane-associated protein; induced in cyr1 or ras1 mutant; induced by hypoxia, ketoconazole and during growth in the mouse cecum; induced in oralpharyngeal candidasis; Spider biofilm induced
T971	R.IM*SELGIGT#PQPVSQE.-	A0A1D8PGA1	-0.254396	0.00317544	Orf19.2007	3638860	CAALFM_C201170CA	hypothetical protein	Ortholog(s) have role in Golgi to vacuole transport, ascospore wall assembly, cellular sphingolipid homeostasis, retrograde transport, endosome to Golgi and GARP complex, mitochondrion localization
S106:S107:S111	R.KKRPLNLIPS#S#PPES#PNAR.D	Q5AD68	-0.519863	0.039878	Orf19.1999	3638793	CAALFM_C201250WA	hypothetical protein	Protein of unknown function; transcript detected on high-resolution tiling arrays
S514	R.QVERDS#FELPTTTNNKNK.N	A0A1D8PGD2	-0.399425	0.00378979	Orf19.1991	3638844	CAALFM_C201340WA	hypothetical protein	Ortholog(s) have cytoplasm localization
S514	R.QVERDS#FELPTTTNNK.N	A0A1D8PGD2	0.496035	0.0240171	Orf19.1991	3638844	CAALFM_C201340WA	hypothetical protein	Ortholog(s) have cytoplasm localization
S607	K.KES#TVEVLDPVFQF.-	Q5ALY5	-0.30732	0.0158757	Orf19.1441	3635723	CAALFM_C201370CA	hypothetical protein	Ortholog of C. dubliniensis CD36 : Cd36_16230, C. parapsilosis CDC317 : CPAR2_213950, Candida tenuis NRRL Y-1498 : CANTEDRAFT_112720 and Debaryomyces hansenii CBS767 : DEHA2A01848g
T608	K.KEST#VEVLDPVFQF.-	Q5ALY5	0.470682	0.0442245	Orf19.1441	3635723	CAALFM_C201370CA	hypothetical protein	Ortholog of C. dubliniensis CD36 : Cd36_16230, C. parapsilosis CDC317 : CPAR2_213950, Candida tenuis NRRL Y-1498 : CANTEDRAFT_112720 and Debaryomyces hansenii CBS767 : DEHA2A01848g
S168	R.SYDDDDGDGGDDFDS#DRR.R	A0A1D8PGB7	0.33134	0.0199775	Orf19.1444	3635726	CAALFM_C201390WA	epsin	Ortholog(s) have phosphatidylinositol-4,5-bisphosphate binding activity, role in actin cortical patch assembly, actin filament organization, endocytosis and actin cortical patch, mating projection tip localization
T440	K.TQNFINSSGT#GYK.Q	A0A1D8PGB7	0.615409	0.0339549	Orf19.1444	3635726	CAALFM_C201390WA	epsin	Ortholog(s) have phosphatidylinositol-4,5-bisphosphate binding activity, role in actin cortical patch assembly, actin filament organization, endocytosis and actin cortical patch, mating projection tip localization
Y442	K.TQNFINSSGTGY#KQTGNEPIR.L	A0A1D8PGB7	1.08408	0.0135749	Orf19.1444	3635726	CAALFM_C201390WA	epsin	Ortholog(s) have phosphatidylinositol-4,5-bisphosphate binding activity, role in actin cortical patch assembly, actin filament organization, endocytosis and actin cortical patch, mating projection tip localization
T440	K.TQNFINSSGT#GYKQTGNEPIR.L	A0A1D8PGB7	1.26092	0.000135475	Orf19.1444	3635726	CAALFM_C201390WA	epsin	Ortholog(s) have phosphatidylinositol-4,5-bisphosphate binding activity, role in actin cortical patch assembly, actin filament organization, endocytosis and actin cortical patch, mating projection tip localization
S438	K.TQNFINSS#GTGYK.Q	A0A1D8PGB7	1.54745	0.00026976	Orf19.1444	3635726	CAALFM_C201390WA	epsin	Ortholog(s) have phosphatidylinositol-4,5-bisphosphate binding activity, role in actin cortical patch assembly, actin filament organization, endocytosis and actin cortical patch, mating projection tip localization
S363	R.VFEEM*SSNNKNTLS#PK.Q	A0A1D8PGB8	0.275106	0.00357526	Orf19.1447	3635841	CAALFM_C201420CA	hypothetical protein	Has domain(s) with predicted sequence-specific DNA binding, transcription factor activity, sequence-specific DNA binding activity and role in regulation of transcription, DNA-templated
S17	K.SFTLEQS#PEIKPKPK.S	A0A1D8PGB8	0.881306	0.000412334	Orf19.1447	3635841	CAALFM_C201420CA	hypothetical protein	Has domain(s) with predicted sequence-specific DNA binding, transcription factor activity, sequence-specific DNA binding activity and role in regulation of transcription, DNA-templated
S98	K.FSSSIPQKPTLS#PK.K	A0A1D8PGB8	1.27893	0.000272366	Orf19.1447	3635841	CAALFM_C201420CA	hypothetical protein	Has domain(s) with predicted sequence-specific DNA binding, transcription factor activity, sequence-specific DNA binding activity and role in regulation of transcription, DNA-templated
S450	R.TNISPES#PTQNSQNHHLNHAR.S	A0A1D8PGH2	-2.88882	0.030454	Orf19.1479	3635744	CAALFM_C201680CA	hypothetical protein	Ortholog of the mitochondria localized S. cerevisiae Pib2 protein of unknown function; has a FYVE zinc finger domain; Spider biofilm induced
S348	R.QLQPEKFNTS#PNAGRTK.H	A0A1D8PGH2	-2.20352	2.28594e-05	Orf19.1479	3635744	CAALFM_C201680CA	hypothetical protein	Ortholog of the mitochondria localized S. cerevisiae Pib2 protein of unknown function; has a FYVE zinc finger domain; Spider biofilm induced
S243:S256:S259	K.KLS#LSPRPVTNPDDIS#IAS#EEEAKSK.L	A0A1D8PGH2	-1.06773	0.0173142	Orf19.1479	3635744	CAALFM_C201680CA	hypothetical protein	Ortholog of the mitochondria localized S. cerevisiae Pib2 protein of unknown function; has a FYVE zinc finger domain; Spider biofilm induced
S243	K.KLS#LSPRPVTNPDDISIASEEEAKSK.L	A0A1D8PGH2	-0.606157	0.00131523	Orf19.1479	3635744	CAALFM_C201680CA	hypothetical protein	Ortholog of the mitochondria localized S. cerevisiae Pib2 protein of unknown function; has a FYVE zinc finger domain; Spider biofilm induced
S297	K.LSS#PSNDAAQKSTGPIENPSNK.S	A0A1D8PGH2	-0.602773	0.0128892	Orf19.1479	3635744	CAALFM_C201680CA	hypothetical protein	Ortholog of the mitochondria localized S. cerevisiae Pib2 protein of unknown function; has a FYVE zinc finger domain; Spider biofilm induced
T223	R.TRADSSDET#DEDNIAQQQNLTLK.A	A0A1D8PGH2	-0.404727	0.0085198	Orf19.1479	3635744	CAALFM_C201680CA	hypothetical protein	Ortholog of the mitochondria localized S. cerevisiae Pib2 protein of unknown function; has a FYVE zinc finger domain; Spider biofilm induced
S243:S245	K.KLS#LS#PRPVTNPDDISIASEEEAKSK.L	A0A1D8PGH2	-0.300661	0.0134436	Orf19.1479	3635744	CAALFM_C201680CA	hypothetical protein	Ortholog of the mitochondria localized S. cerevisiae Pib2 protein of unknown function; has a FYVE zinc finger domain; Spider biofilm induced
S259	K.LSLSPRPVTNPDDISIAS#EEEAKSK.L	A0A1D8PGH2	0.2168	0.0314119	Orf19.1479	3635744	CAALFM_C201680CA	hypothetical protein	Ortholog of the mitochondria localized S. cerevisiae Pib2 protein of unknown function; has a FYVE zinc finger domain; Spider biofilm induced
S119	R.TQS#FQSVLSTASLK.S	A0A1D8PGH2	0.26439	0.0453394	Orf19.1479	3635744	CAALFM_C201680CA	hypothetical protein	Ortholog of the mitochondria localized S. cerevisiae Pib2 protein of unknown function; has a FYVE zinc finger domain; Spider biofilm induced
T286	K.LVKEPYQPAEVDLSSFASLT#R.Q	A0A1D8PGH2	0.371768	0.0313401	Orf19.1479	3635744	CAALFM_C201680CA	hypothetical protein	Ortholog of the mitochondria localized S. cerevisiae Pib2 protein of unknown function; has a FYVE zinc finger domain; Spider biofilm induced
T347	R.QLQPEKFNT#SPNAGR.T	A0A1D8PGH2	0.506298	0.00140719	Orf19.1479	3635744	CAALFM_C201680CA	hypothetical protein	Ortholog of the mitochondria localized S. cerevisiae Pib2 protein of unknown function; has a FYVE zinc finger domain; Spider biofilm induced
S297	K.LSS#PSNDAAQK.S	A0A1D8PGH2	0.530573	0.000864187	Orf19.1479	3635744	CAALFM_C201680CA	hypothetical protein	Ortholog of the mitochondria localized S. cerevisiae Pib2 protein of unknown function; has a FYVE zinc finger domain; Spider biofilm induced
T126	R.TQSFQSVLST#ASLK.S	A0A1D8PGH2	0.734217	0.00311907	Orf19.1479	3635744	CAALFM_C201680CA	hypothetical protein	Ortholog of the mitochondria localized S. cerevisiae Pib2 protein of unknown function; has a FYVE zinc finger domain; Spider biofilm induced
S348	K.FNTS#PNAGR.T	A0A1D8PGH2	1.53617	3.32134e-06	Orf19.1479	3635744	CAALFM_C201680CA	hypothetical protein	Ortholog of the mitochondria localized S. cerevisiae Pib2 protein of unknown function; has a FYVE zinc finger domain; Spider biofilm induced
S352,S352	K.AAVGVTIS#PK.V	Q5AM84	-0.392838	0.023084	Orf19.1491	3635831	CAALFM_C201820CA	hypothetical protein	Ortholog(s) have RNA binding activity, role in mRNA splicing, via spliceosome and U1 snRNP, U2-type prespliceosome localization
S387	K.NNS#SPSASSISSEIDRFNDELIR.W	A0A1D8PGH3	0.51716	0.00403708	Orf19.1496	3635836	CAALFM_C201870CA	hypothetical protein	Putative transcription factor with zinc finger DNA-binding motif; Hap43p-repressed gene
S388	K.NNSS#PSASSISSEIDRFNDELIR.W	A0A1D8PGH3	0.63822	0.000271739	Orf19.1496	3635836	CAALFM_C201870CA	hypothetical protein	Putative transcription factor with zinc finger DNA-binding motif; Hap43p-repressed gene
S18	K.HQPS#KLDLIDDTTLTSLPLPPPPPLRR.H	A0A1D8PGG2	-0.355345	0.00522694	Orf19.1505	3635793	CAALFM_C201930CA	hypothetical protein	Ortholog(s) have cytoplasm localization
S184	R.QQS#LANFK.Q	A0A1D8PGG2	0.763675	0.00184481	Orf19.1505	3635793	CAALFM_C201930CA	hypothetical protein	Ortholog(s) have cytoplasm localization
S30	R.NSDSFDESRS#PASPNKPDHK.I	A0A1D8PGG5	-0.559085	0.0052669	Orf19.1514	3635767	CAALFM_C202000WA	hypothetical protein	Ortholog(s) have enzyme binding, phosphatidylinositol-4-phosphate binding activity
S22	R.NS#DSFDESRSPASPNKPDHK.I	A0A1D8PGG5	-0.459565	0.0351032	Orf19.1514	3635767	CAALFM_C202000WA	hypothetical protein	Ortholog(s) have enzyme binding, phosphatidylinositol-4-phosphate binding activity
S232	R.NVDLDTVS#NEQFPADTSFR.Y	A0A1D8PGG5	-0.357264	0.0357915	Orf19.1514	3635767	CAALFM_C202000WA	hypothetical protein	Ortholog(s) have enzyme binding, phosphatidylinositol-4-phosphate binding activity
S33	R.SPAS#PNKPDHK.I	A0A1D8PGG5	-0.232057	0.00547109	Orf19.1514	3635767	CAALFM_C202000WA	hypothetical protein	Ortholog(s) have enzyme binding, phosphatidylinositol-4-phosphate binding activity
S24	R.NSDS#FDESRSPASPNKPDHK.I	A0A1D8PGG5	-0.159852	0.00925122	Orf19.1514	3635767	CAALFM_C202000WA	hypothetical protein	Ortholog(s) have enzyme binding, phosphatidylinositol-4-phosphate binding activity
S24:S33	R.NSDS#FDESRSPAS#PNKPDHK.I	A0A1D8PGG5	-0.15933	0.0445648	Orf19.1514	3635767	CAALFM_C202000WA	hypothetical protein	Ortholog(s) have enzyme binding, phosphatidylinositol-4-phosphate binding activity
S22	R.NS#DSFDESR.S	A0A1D8PGG5	0.192055	0.0471269	Orf19.1514	3635767	CAALFM_C202000WA	hypothetical protein	Ortholog(s) have enzyme binding, phosphatidylinositol-4-phosphate binding activity
S22:S24	K.QSTPKPRNS#DS#FDESR.S	A0A1D8PGG5	0.507384	0.00403579	Orf19.1514	3635767	CAALFM_C202000WA	hypothetical protein	Ortholog(s) have enzyme binding, phosphatidylinositol-4-phosphate binding activity
S22	K.QSTPKPRNS#DSFDESR.S	A0A1D8PGG5	0.735681	0.000185496	Orf19.1514	3635767	CAALFM_C202000WA	hypothetical protein	Ortholog(s) have enzyme binding, phosphatidylinositol-4-phosphate binding activity
S94	R.NKLLYDDNGEKS#PK.I	A0A1D8PGI9	0.869198	0.00550172	Orf19.1516	3635769	CAALFM_C202020WA	ubiquitin-specific protease	Ortholog(s) have ubiquitin-specific protease activity, role in negative regulation of gluconeogenesis, proteasome-mediated ubiquitin-dependent protein catabolic process, protein deubiquitination and nucleoplasm localization
S94	K.LLYDDNGEKS#PKIQK.L	A0A1D8PGI9	1.07244	0.00122691	Orf19.1516	3635769	CAALFM_C202020WA	ubiquitin-specific protease	Ortholog(s) have ubiquitin-specific protease activity, role in negative regulation of gluconeogenesis, proteasome-mediated ubiquitin-dependent protein catabolic process, protein deubiquitination and nucleoplasm localization
S94	K.LLYDDNGEKS#PK.I	A0A1D8PGI9	1.70537	0.00099015	Orf19.1516	3635769	CAALFM_C202020WA	ubiquitin-specific protease	Ortholog(s) have ubiquitin-specific protease activity, role in negative regulation of gluconeogenesis, proteasome-mediated ubiquitin-dependent protein catabolic process, protein deubiquitination and nucleoplasm localization
S827	K.LRSS#VAGM*M*DLLANLENTTTTNDKPK.Q	A0A1D8PGI3	-1.60911	0.00737972	Orf19.1519	3635848	CAALFM_C202040WA	hypothetical protein	Protein of unknown function; Hap43-repressed gene
S445	R.SSVDNQS#PERNVITPDLENKTAPESTNTR.E	A0A1D8PGI3	-0.462854	0.0136491	Orf19.1519	3635848	CAALFM_C202040WA	hypothetical protein	Protein of unknown function; Hap43-repressed gene
S424	K.YFGS#DLEDTNDDEGIFHR.S	A0A1D8PGI3	0.55104	0.00307959	Orf19.1519	3635848	CAALFM_C202040WA	hypothetical protein	Protein of unknown function; Hap43-repressed gene
S445	R.SSVDNQS#PERNVITPDLENK.T	A0A1D8PGI3	0.559842	0.000338495	Orf19.1519	3635848	CAALFM_C202040WA	hypothetical protein	Protein of unknown function; Hap43-repressed gene
S503	K.TQS#PKPSPTK.S	A0A1D8PGI3	0.660159	0.0029884	Orf19.1519	3635848	CAALFM_C202040WA	hypothetical protein	Protein of unknown function; Hap43-repressed gene
S211	K.NSNS#VTETTPLIDNTK.N	A0A1D8PGH6	-0.156436	0.0272868	Orf19.1534	3635752	CAALFM_C202180WA	Zn(2+) transporter	Ortholog of S. cerevisiae Zrt3, vacuolar membrane zinc transporter; predicted Kex2 substrate; induced in oralpharyngeal candidasis; flow model biofilm induced; Spider biofilm induced
S145,S145	R.HQS#NHSDYDNDHPQLSLPNGK.K	Q5ALP1	-3.2269	0.0149313	Orf19.1535	3635753	CAALFM_C202190CA	hypothetical protein	Protein of unknown function; Hap43-induced gene
S80,S80	K.SKPASSS#TTNFK.L	Q5ALP1	0.718869	0.00459547	Orf19.1535	3635753	CAALFM_C202190CA	hypothetical protein	Protein of unknown function; Hap43-induced gene
S89,S89	K.LTAS#PSLPSGAKPNFQPYK.S	Q5ALP1	0.733263	0.00617471	Orf19.1535	3635753	CAALFM_C202190CA	hypothetical protein	Protein of unknown function; Hap43-induced gene
S204	K.STPS#EVFDYLPDNVVER.Y	A0A1D8PGL8	-0.378401	0.0410248	Orf19.1537	3635772	CAALFM_C202200WA	Zn(2+) transporter	#N/A
T18	K.ELTVEDTNVSDT#ELSKEERLEAARK.K	Q5ALN3	-0.828172	0.00879907	Orf19.1544	3635778	CAALFM_C202260WA	hypothetical protein	Putative cis-golgi localized protein involved in ER to Golgi transport; Spider biofilm repressed
T63	K.KSETTEIEDSAEGT#PAPEDKPEDK.S	Q5ALN3	0.469224	0.00428769	Orf19.1544	3635778	CAALFM_C202260WA	hypothetical protein	Putative cis-golgi localized protein involved in ER to Golgi transport; Spider biofilm repressed
S127	K.VSEEAIPES#SSSSLTSELEKQVEELK.Q	Q5ALN3	0.516679	0.00386321	Orf19.1544	3635778	CAALFM_C202260WA	hypothetical protein	Putative cis-golgi localized protein involved in ER to Golgi transport; Spider biofilm repressed
T63	K.KSETTEIEDSAEGT#PAPEDKPEDKSEEK.A	Q5ALN3	0.586562	0.0313548	Orf19.1544	3635778	CAALFM_C202260WA	hypothetical protein	Putative cis-golgi localized protein involved in ER to Golgi transport; Spider biofilm repressed
S222	K.NDYAS#SSQQSFSK.S	Q5ALN3	0.870211	0.000237077	Orf19.1544	3635778	CAALFM_C202260WA	hypothetical protein	Putative cis-golgi localized protein involved in ER to Golgi transport; Spider biofilm repressed
S224	K.NDYASSS#QQSFSK.S	Q5ALN3	0.958686	0.00137172	Orf19.1544	3635778	CAALFM_C202260WA	hypothetical protein	Putative cis-golgi localized protein involved in ER to Golgi transport; Spider biofilm repressed
S199	K.ALTSSASSVPGGS#PIATYK.E	Q5ALN3	1.01072	0.00192073	Orf19.1544	3635778	CAALFM_C202260WA	hypothetical protein	Putative cis-golgi localized protein involved in ER to Golgi transport; Spider biofilm repressed
S215	K.TTS#DDDKEKETNININNLM*GFNSFGSTK.L	A0A1D8PGM6	-0.915358	0.0035377	Orf19.1548	3635808	CAALFM_C202300WA	U4/U6-U5 snRNP complex subunit	Ortholog(s) have role in mRNA splicing, via spliceosome and U4/U6 x U5 tri-snRNP complex localization
T214	K.TT#SDDDKEKETNININNLM*GFNSFGSTKLS.-	A0A1D8PGM6	-0.521091	0.017314	Orf19.1548	3635808	CAALFM_C202300WA	U4/U6-U5 snRNP complex subunit	Ortholog(s) have role in mRNA splicing, via spliceosome and U4/U6 x U5 tri-snRNP complex localization
S176	K.SLS#SEYEDVSELKERK.-	A0A1D8PGL1	-0.277074	0.000807265	Orf19.1564	3635755	CAALFM_C202410WA	hypothetical protein	Plasma membrane-localized protein of unknown function
S176	K.SLS#SEYEDVSELK.E	A0A1D8PGL1	0.266454	0.0220903	Orf19.1564	3635755	CAALFM_C202410WA	hypothetical protein	Plasma membrane-localized protein of unknown function
Y179	K.SLSSEY#EDVSELK.E	A0A1D8PGL1	0.330776	0.0345334	Orf19.1564	3635755	CAALFM_C202410WA	hypothetical protein	Plasma membrane-localized protein of unknown function
S177	K.SLSS#EYEDVSELK.E	A0A1D8PGL1	0.360522	0.00947012	Orf19.1564	3635755	CAALFM_C202410WA	hypothetical protein	Plasma membrane-localized protein of unknown function
S183	K.SLSSEYEDVS#ELKERK.-	A0A1D8PGL1	0.547422	0.00447381	Orf19.1564	3635755	CAALFM_C202410WA	hypothetical protein	Plasma membrane-localized protein of unknown function
S522	K.RITVEELELNNYS#ESEYDTDNTTK.K	A0A1D8PGN0	-0.842076	0.0261921	Orf19.1567	3635758	CAALFM_C202440WA	hypothetical protein	Ortholog(s) have Rab GTPase binding, Ras guanyl-nucleotide exchange factor activity, phosphatidylinositol binding activity
S522	R.ITVEELELNNYS#ESEYDTDNTTK.K	A0A1D8PGN0	-0.520413	0.020282	Orf19.1567	3635758	CAALFM_C202440WA	hypothetical protein	Ortholog(s) have Rab GTPase binding, Ras guanyl-nucleotide exchange factor activity, phosphatidylinositol binding activity
Y521	R.ITVEELELNNY#SESEYDTDNTTKK.G	A0A1D8PGN0	-0.498674	0.0282955	Orf19.1567	3635758	CAALFM_C202440WA	hypothetical protein	Ortholog(s) have Rab GTPase binding, Ras guanyl-nucleotide exchange factor activity, phosphatidylinositol binding activity
S79	R.ETS#PLLSADENDNDLQRVR.S	A0A1D8PGL4	-0.97743	0.0490933	Orf19.1573	3635815	CAALFM_C202490CA	putative acid anhydride hydrolase	Ortholog(s) have endoplasmic reticulum, fungal-type vacuole membrane, vacuole-mitochondrion membrane contact site localization
S75:S83	R.VS#RETSPLLS#ADENDNDLQRVR.S	A0A1D8PGL4	-0.945649	0.0340019	Orf19.1573	3635815	CAALFM_C202490CA	putative acid anhydride hydrolase	Ortholog(s) have endoplasmic reticulum, fungal-type vacuole membrane, vacuole-mitochondrion membrane contact site localization
S83	R.ETSPLLS#ADENDNDLQRVR.S	A0A1D8PGL4	-0.798328	0.027603	Orf19.1573	3635815	CAALFM_C202490CA	putative acid anhydride hydrolase	Ortholog(s) have endoplasmic reticulum, fungal-type vacuole membrane, vacuole-mitochondrion membrane contact site localization
S79	R.VSRETS#PLLSADENDNDLQRVR.S	A0A1D8PGL4	-0.762847	0.0101118	Orf19.1573	3635815	CAALFM_C202490CA	putative acid anhydride hydrolase	Ortholog(s) have endoplasmic reticulum, fungal-type vacuole membrane, vacuole-mitochondrion membrane contact site localization
S79	R.ETS#PLLSADENDNDLQR.V	A0A1D8PGL4	-0.710544	0.00947764	Orf19.1573	3635815	CAALFM_C202490CA	putative acid anhydride hydrolase	Ortholog(s) have endoplasmic reticulum, fungal-type vacuole membrane, vacuole-mitochondrion membrane contact site localization
T78:S79	R.ISRVSRET#S#PLLSADENDNDLQR.V	A0A1D8PGL4	0.168073	0.0254366	Orf19.1573	3635815	CAALFM_C202490CA	putative acid anhydride hydrolase	Ortholog(s) have endoplasmic reticulum, fungal-type vacuole membrane, vacuole-mitochondrion membrane contact site localization
Y186:S196	R.Y#SSPEAPDYGS#VDFENHNR.R	A0A1D8PGL4	0.468346	0.0298445	Orf19.1573	3635815	CAALFM_C202490CA	putative acid anhydride hydrolase	Ortholog(s) have endoplasmic reticulum, fungal-type vacuole membrane, vacuole-mitochondrion membrane contact site localization
S102	R.SNASRNS#IDTQANFR.F	A0A1D8PGL4	0.767264	0.00751106	Orf19.1573	3635815	CAALFM_C202490CA	putative acid anhydride hydrolase	Ortholog(s) have endoplasmic reticulum, fungal-type vacuole membrane, vacuole-mitochondrion membrane contact site localization
S304:S308:S312	R.FGTS#ATPS#AVNS#PVAM*R.M	A0A1D8PGL0	-0.964669	0.000204567	Orf19.1574	3635816	CAALFM_C202500WA	hypothetical protein	Putative TFIID subunit involved in RNA polymerase II transcription initiation; possibly an essential gene, disruptants not obtained by UAU1 method
T303:T306:S312	R.FGT#SAT#PSAVNS#PVAM*R.M	A0A1D8PGL0	-0.792825	0.0461271	Orf19.1574	3635816	CAALFM_C202500WA	hypothetical protein	Putative TFIID subunit involved in RNA polymerase II transcription initiation; possibly an essential gene, disruptants not obtained by UAU1 method
S105	R.IKPTRIPGEGYDS#EAPDLEDDPLIEQGIIIR.F	A0A1D8PGL0	-0.576293	0.000187536	Orf19.1574	3635816	CAALFM_C202500WA	hypothetical protein	Putative TFIID subunit involved in RNA polymerase II transcription initiation; possibly an essential gene, disruptants not obtained by UAU1 method
S27	K.LKM*PSSSASNSPQPPPPESHS#PEQPKLPK.L	A0A1D8PGL0	-0.364115	0.0119306	Orf19.1574	3635816	CAALFM_C202500WA	hypothetical protein	Putative TFIID subunit involved in RNA polymerase II transcription initiation; possibly an essential gene, disruptants not obtained by UAU1 method
T289:S294	R.QLSIRDTSIDT#PLSRS#PEQQQQQK.H	A0A1D8PGM1	-0.398398	0.0285698	Orf19.1576	3635818	CAALFM_C202520WA	hypothetical protein	Ortholog(s) have nuclear localization sequence binding, ubiquitin binding activity, role in response to ethanol and cytosol localization
S459	R.EYYESLLEQQQTAPKS#R.R	A0A1D8PGM1	0.232114	0.0048372	Orf19.1576	3635818	CAALFM_C202520WA	hypothetical protein	Ortholog(s) have nuclear localization sequence binding, ubiquitin binding activity, role in response to ethanol and cytosol localization
S21	R.GGS#KPLSALEVK.E	A0A1D8PGR5	0.495165	0.00613645	Orf19.1578	3635820	CAALFM_C202540WA	hypothetical protein	Ortholog of S. cereviaie Rrp5, an RNA binding protein involved in synthesis of 18S and 5.8S rRNAs; Hap43-induced gene
T49	R.KSTEDSIAVVENEVPST#PVEEPSEYM*IR.R	Q5ALJ4	-1.40374	0.0325432	Orf19.1584	3635860	CAALFM_C202580WA	hypothetical protein	Predicted MFS membrane transporter; monocarboxylate porter family member; colony morphology-related gene regulation by Ssn6; flow model biofilm induced; Spider biofilm induced
S73	R.EGSHVAPAIES#PGDSPRYDSR.A	Q5ALJ4	-1.12029	0.010069	Orf19.1584	3635860	CAALFM_C202580WA	hypothetical protein	Predicted MFS membrane transporter; monocarboxylate porter family member; colony morphology-related gene regulation by Ssn6; flow model biofilm induced; Spider biofilm induced
S73:S77	R.REGSHVAPAIES#PGDS#PRYDSR.A	Q5ALJ4	-0.917102	0.00257025	Orf19.1584	3635860	CAALFM_C202580WA	hypothetical protein	Predicted MFS membrane transporter; monocarboxylate porter family member; colony morphology-related gene regulation by Ssn6; flow model biofilm induced; Spider biofilm induced
S73:S77	R.RREGSHVAPAIES#PGDS#PRYDSR.A	Q5ALJ4	-0.809934	0.0257016	Orf19.1584	3635860	CAALFM_C202580WA	hypothetical protein	Predicted MFS membrane transporter; monocarboxylate porter family member; colony morphology-related gene regulation by Ssn6; flow model biofilm induced; Spider biofilm induced
S908	K.NAILS#SESSQKTQQK.V	A0A1D8PGN9	0.528222	0.0343767	Orf19.5834	3643002	CAALFM_C202720WA	hypothetical protein	Ortholog(s) have protein transporter activity, role in mRNA export from nucleus and cytoplasm, nucleus localization
S908:S909	K.NAILS#S#ESSQKTQQK.V	A0A1D8PGN9	0.692007	0.00807273	Orf19.5834	3643002	CAALFM_C202720WA	hypothetical protein	Ortholog(s) have protein transporter activity, role in mRNA export from nucleus and cytoplasm, nucleus localization
S912	K.NAILSSESS#QKTQQK.V	A0A1D8PGN9	1.02534	0.00159073	Orf19.5834	3643002	CAALFM_C202720WA	hypothetical protein	Ortholog(s) have protein transporter activity, role in mRNA export from nucleus and cytoplasm, nucleus localization
S356	K.DKNTNYPSLKNHTRS#PDAIEID.-	Q5A0H8	-3.17321	3.37472e-05	Orf19.5833	3643035	CAALFM_C202730WA	polyubiquitin-binding protein	Ortholog(s) have polyubiquitin binding activity
T345	K.NT#NYPSLKNHTRSPDAIEID.-	Q5A0H8	-2.31333	0.000319064	Orf19.5833	3643035	CAALFM_C202730WA	polyubiquitin-binding protein	Ortholog(s) have polyubiquitin binding activity
S337	K.QQAFSGSGQSLRQS#KK.R	Q5A0H8	1.17794	0.0252757	Orf19.5833	3643035	CAALFM_C202730WA	polyubiquitin-binding protein	Ortholog(s) have polyubiquitin binding activity
S367	R.LNNS#DDILNETSRIDPVDSK.A	A0A1D8PGR8	0.21376	0.0291824	Orf19.5828	3643031	CAALFM_C202770WA	hypothetical protein	Ortholog(s) have mRNA binding, pre-mRNA branch point binding activity, role in mRNA branch site recognition, mRNA cis splicing, via spliceosome and U2-type prespliceosome, U2AF, commitment complex localization
S1082,S1082	R.RDSS#LSINPIPEEELEDDNLGFLSNFVGTSKK.A	Q5A0J0	-0.818684	0.00445774	Orf19.5821	3642976	CAALFM_C202840CA	hypothetical protein	Ortholog of S. cerevisiae : YML002W, C. glabrata CBS138 : CAGL0L07634g, C. dubliniensis CD36 : Cd36_17530, C. parapsilosis CDC317 : CPAR2_212430 and Candida tenuis NRRL Y-1498 : CANTEDRAFT_128807
S239,S239	K.ENQGDDGS#DEDDEEDDDEEEK.S	Q5A0J9	0.522721	0.01136	Orf19.5812	3643015	CAALFM_C202930CA	hypothetical protein	Ortholog of S. cerevisiae Ett1, a nuclear protein that inhibits replication of Brome mosaic virus; early-stage flow model biofilm induced
S474	R.SLS#NLGKSPANPSQTPSSHKR.T	Q5A0L2	-2.60188	0.00896018	Orf19.5799	3643019	CAALFM_C203020CA	hypothetical protein	Ortholog(s) have cytoplasm localization
S472	R.NRS#LSNLGKSPANPSQTPSSHKR.T	Q5A0L2	-2.57429	0.00356033	Orf19.5799	3643019	CAALFM_C203020CA	hypothetical protein	Ortholog(s) have cytoplasm localization
S472	R.S#LSNLGKSPANPSQTPSSHKR.T	Q5A0L2	-2.39005	0.0367372	Orf19.5799	3643019	CAALFM_C203020CA	hypothetical protein	Ortholog(s) have cytoplasm localization
S131	R.IFSNEDADSIYS#SHSVTGR.S	Q5A0L2	-2.10151	0.0197329	Orf19.5799	3643019	CAALFM_C203020CA	hypothetical protein	Ortholog(s) have cytoplasm localization
S418	K.NHGVS#RSDSNSSLSSLSNQAPNTPK.N	Q5A0L2	-1.22914	0.0149097	Orf19.5799	3643019	CAALFM_C203020CA	hypothetical protein	Ortholog(s) have cytoplasm localization
T5:S9	-.LGNT#PPAS#PIYR.R	Q5A0L2	-0.934014	0.00167164	Orf19.5799	3643019	CAALFM_C203020CA	hypothetical protein	Ortholog(s) have cytoplasm localization
T5:S9	-.LGNT#PPAS#PIYRR.V	Q5A0L2	-0.611835	0.0185711	Orf19.5799	3643019	CAALFM_C203020CA	hypothetical protein	Ortholog(s) have cytoplasm localization
T110:S112	R.IKTT#PS#SFVR.Q	Q5A0L2	0.40223	0.00243635	Orf19.5799	3643019	CAALFM_C203020CA	hypothetical protein	Ortholog(s) have cytoplasm localization
S472	R.NRS#LSNLGK.S	Q5A0L2	0.533727	0.000474555	Orf19.5799	3643019	CAALFM_C203020CA	hypothetical protein	Ortholog(s) have cytoplasm localization
S633	K.LYENLDLDYGEITS#PVFK.F	Q5A0L2	0.610722	0.0209705	Orf19.5799	3643019	CAALFM_C203020CA	hypothetical protein	Ortholog(s) have cytoplasm localization
S472:S474	R.NRS#LS#NLGK.S	Q5A0L2	0.743009	0.0143281	Orf19.5799	3643019	CAALFM_C203020CA	hypothetical protein	Ortholog(s) have cytoplasm localization
S127	R.RLGS#LQM*TTDTAIR.T	A0A1D8PGT0	-0.907522	0.0058026	Orf19.5783	3642993	CAALFM_C203130WA	protein-arginine N-methyltransferase	Ortholog(s) have protein-arginine omega-N monomethyltransferase activity and role in peptidyl-arginine methylation
S51	K.S#FNSAHFSVSEDR.F	Q5AHA6	-1.98686	0.0474357	Orf19.891	3637389	CAALFM_C203360WA	AMP deaminase	Putative AMP deaminase; possibly an essential gene, disruptants not obtained by UAU1 method
S98	K.AFEALHNSGSNNNNHNQVQTFSPVS#PK.L	Q5AHA6	-1.91947	0.0212309	Orf19.891	3637389	CAALFM_C203360WA	AMP deaminase	Putative AMP deaminase; possibly an essential gene, disruptants not obtained by UAU1 method
S109	R.RSS#IIDM*PQR.L	Q5AHA6	0.527362	3.99923e-05	Orf19.891	3637389	CAALFM_C203360WA	AMP deaminase	Putative AMP deaminase; possibly an essential gene, disruptants not obtained by UAU1 method
S916:S920	K.AFS#LPSS#PTK.Q	A0A1D8PGY3	0.298652	0.0349486	Orf19.871	3637345	CAALFM_C203500WA	hypothetical protein	Ortholog(s) have GTPase activator activity, role in positive regulation of GTPase activity, positive regulation of TORC1 signaling and Lst4-Lst7 complex, vacuolar membrane localization
S48	K.DFNDSIIQLEAPSIDASREVS#TSPTNSKGSTR.L	A0A1D8PGW6	-0.411082	0.00132132	Orf19.862	3637336	CAALFM_C203570CA	hypothetical protein	Protein of unknown function; Spider biofilm induced
T118	K.HEHM*GSRNT#FTNINDFNNSSEVGR.T	A0A1D8PH10	-1.98297	0.00217544	Orf19.846	3637371	CAALFM_C203760CA	protein kinase	Predicted protein kinase similar to S. cerevisiae Nnk1; implicated in proteasome function in S. cerevisiae; induced by Mnl1 under weak acid stress
S506	R.DFDGGPGIGNHSSGNLNS#KTDLTGSM*K.S	A0A1D8PH10	-1.87843	0.0456438	Orf19.846	3637371	CAALFM_C203760CA	protein kinase	Predicted protein kinase similar to S. cerevisiae Nnk1; implicated in proteasome function in S. cerevisiae; induced by Mnl1 under weak acid stress
S82	R.RYS#ETEKNNFDPETGHRIFADGK.I	A0A1D8PH10	-1.72416	9.18723e-05	Orf19.846	3637371	CAALFM_C203760CA	protein kinase	Predicted protein kinase similar to S. cerevisiae Nnk1; implicated in proteasome function in S. cerevisiae; induced by Mnl1 under weak acid stress
T425	R.T#STTDFKKLQEAM*KPK.Y	A0A1D8PH10	-0.959486	0.00592959	Orf19.846	3637371	CAALFM_C203760CA	protein kinase	Predicted protein kinase similar to S. cerevisiae Nnk1; implicated in proteasome function in S. cerevisiae; induced by Mnl1 under weak acid stress
Y81	R.RY#SETEKNNFDPETGHR.I	A0A1D8PH10	-0.591424	0.0136891	Orf19.846	3637371	CAALFM_C203760CA	protein kinase	Predicted protein kinase similar to S. cerevisiae Nnk1; implicated in proteasome function in S. cerevisiae; induced by Mnl1 under weak acid stress
S82	R.RYS#ETEKNNFDPETGHR.I	A0A1D8PH10	-0.466944	0.00775007	Orf19.846	3637371	CAALFM_C203760CA	protein kinase	Predicted protein kinase similar to S. cerevisiae Nnk1; implicated in proteasome function in S. cerevisiae; induced by Mnl1 under weak acid stress
S253	R.NLS#YSKLHEFM*K.T	A0A1D8PH10	-0.45354	0.0411479	Orf19.846	3637371	CAALFM_C203760CA	protein kinase	Predicted protein kinase similar to S. cerevisiae Nnk1; implicated in proteasome function in S. cerevisiae; induced by Mnl1 under weak acid stress
S501	R.DFDGGPGIGNHSS#GNLNSK.T	A0A1D8PH10	-0.407707	0.0450729	Orf19.846	3637371	CAALFM_C203760CA	protein kinase	Predicted protein kinase similar to S. cerevisiae Nnk1; implicated in proteasome function in S. cerevisiae; induced by Mnl1 under weak acid stress
S717	R.KLDFDIRDDS#RVGLANFFR.A	A0A1D8PH10	-0.365109	0.0109408	Orf19.846	3637371	CAALFM_C203760CA	protein kinase	Predicted protein kinase similar to S. cerevisiae Nnk1; implicated in proteasome function in S. cerevisiae; induced by Mnl1 under weak acid stress
S403:S404	K.TLKGSSSGTGIASASS#S#LSRR.N	A0A1D8PH10	-0.173243	0.0260897	Orf19.846	3637371	CAALFM_C203760CA	protein kinase	Predicted protein kinase similar to S. cerevisiae Nnk1; implicated in proteasome function in S. cerevisiae; induced by Mnl1 under weak acid stress
S500	R.DFDGGPGIGNHS#SGNLNSK.T	A0A1D8PH10	0.255432	0.000188986	Orf19.846	3637371	CAALFM_C203760CA	protein kinase	Predicted protein kinase similar to S. cerevisiae Nnk1; implicated in proteasome function in S. cerevisiae; induced by Mnl1 under weak acid stress
S689	R.SRS#SNIEFR.K	A0A1D8PH10	0.262519	0.0162007	Orf19.846	3637371	CAALFM_C203760CA	protein kinase	Predicted protein kinase similar to S. cerevisiae Nnk1; implicated in proteasome function in S. cerevisiae; induced by Mnl1 under weak acid stress
S226	R.DGS#YLDLNLLHSK.V	A0A1D8PH10	0.305442	0.000519165	Orf19.846	3637371	CAALFM_C203760CA	protein kinase	Predicted protein kinase similar to S. cerevisiae Nnk1; implicated in proteasome function in S. cerevisiae; induced by Mnl1 under weak acid stress
S674	K.GNNKLS#IDGDLEDTLM*M*R.S	A0A1D8PH10	0.319166	0.0347081	Orf19.846	3637371	CAALFM_C203760CA	protein kinase	Predicted protein kinase similar to S. cerevisiae Nnk1; implicated in proteasome function in S. cerevisiae; induced by Mnl1 under weak acid stress
S128	R.NTFTNINDFNNS#SEVGR.T	A0A1D8PH10	0.469487	0.0359766	Orf19.846	3637371	CAALFM_C203760CA	protein kinase	Predicted protein kinase similar to S. cerevisiae Nnk1; implicated in proteasome function in S. cerevisiae; induced by Mnl1 under weak acid stress
S426	R.TS#TTDFK.K	A0A1D8PH10	0.487322	0.0107539	Orf19.846	3637371	CAALFM_C203760CA	protein kinase	Predicted protein kinase similar to S. cerevisiae Nnk1; implicated in proteasome function in S. cerevisiae; induced by Mnl1 under weak acid stress
S300	R.SSSGLGSS#PGSVKR.E	A0A1D8PH10	0.557621	0.0016768	Orf19.846	3637371	CAALFM_C203760CA	protein kinase	Predicted protein kinase similar to S. cerevisiae Nnk1; implicated in proteasome function in S. cerevisiae; induced by Mnl1 under weak acid stress
S382	K.NYLGSS#VGSAK.T	A0A1D8PH10	0.738839	0.00240768	Orf19.846	3637371	CAALFM_C203760CA	protein kinase	Predicted protein kinase similar to S. cerevisiae Nnk1; implicated in proteasome function in S. cerevisiae; induced by Mnl1 under weak acid stress
S426	R.TS#TTDFKK.L	A0A1D8PH10	0.761798	0.00729977	Orf19.846	3637371	CAALFM_C203760CA	protein kinase	Predicted protein kinase similar to S. cerevisiae Nnk1; implicated in proteasome function in S. cerevisiae; induced by Mnl1 under weak acid stress
S382:S385	K.NYLGSS#VGS#AKTLK.G	A0A1D8PH10	0.822374	0.00378147	Orf19.846	3637371	CAALFM_C203760CA	protein kinase	Predicted protein kinase similar to S. cerevisiae Nnk1; implicated in proteasome function in S. cerevisiae; induced by Mnl1 under weak acid stress
S385	K.NYLGSSVGS#AK.T	A0A1D8PH10	0.8735	0.0309609	Orf19.846	3637371	CAALFM_C203760CA	protein kinase	Predicted protein kinase similar to S. cerevisiae Nnk1; implicated in proteasome function in S. cerevisiae; induced by Mnl1 under weak acid stress
S717	R.KLDFDIRDDS#R.V	A0A1D8PH10	0.96863	0.000882345	Orf19.846	3637371	CAALFM_C203760CA	protein kinase	Predicted protein kinase similar to S. cerevisiae Nnk1; implicated in proteasome function in S. cerevisiae; induced by Mnl1 under weak acid stress
S426:T427	R.LLARTS#T#TDFK.K	A0A1D8PH10	1.25878	0.000512928	Orf19.846	3637371	CAALFM_C203760CA	protein kinase	Predicted protein kinase similar to S. cerevisiae Nnk1; implicated in proteasome function in S. cerevisiae; induced by Mnl1 under weak acid stress
S382:S385	K.NYLGSS#VGS#AK.T	A0A1D8PH10	1.43604	2.55267e-05	Orf19.846	3637371	CAALFM_C203760CA	protein kinase	Predicted protein kinase similar to S. cerevisiae Nnk1; implicated in proteasome function in S. cerevisiae; induced by Mnl1 under weak acid stress
T446	R.ELNEKLENDLT#NLQDVTSNNRFNDNASLISGM*TR.M	A0A1D8PGY6	-0.462292	0.0315498	Orf19.841	3637401	CAALFM_C203800CA	hypothetical protein	Ortholog(s) have role in Golgi vesicle transport and Golgi membrane localization
T515:S516	R.DAEDHDDT#S#GGEEVDDRKKK.S	A0A1D8PGZ6	-0.517393	0.00554576	Orf19.835	3637395	CAALFM_C203900CA	hypothetical protein	Ortholog(s) have role in nucleosome mobilization and Ino80 complex, cytosol localization
T515	R.DAEDHDDT#SGGEEVDDRKKK.S	A0A1D8PGZ6	-0.507806	0.0387051	Orf19.835	3637395	CAALFM_C203900CA	hypothetical protein	Ortholog(s) have role in nucleosome mobilization and Ino80 complex, cytosol localization
T515	K.RDAEDHDDT#SGGEEVDDRKK.K	A0A1D8PGZ6	-0.482447	0.00194856	Orf19.835	3637395	CAALFM_C203900CA	hypothetical protein	Ortholog(s) have role in nucleosome mobilization and Ino80 complex, cytosol localization
S516	R.DAEDHDDTS#GGEEVDDRKK.K	A0A1D8PGZ6	-0.390222	0.0447435	Orf19.835	3637395	CAALFM_C203900CA	hypothetical protein	Ortholog(s) have role in nucleosome mobilization and Ino80 complex, cytosol localization
T515:S516	R.DAEDHDDT#S#GGEEVDDRKK.K	A0A1D8PGZ6	-0.321734	0.0108011	Orf19.835	3637395	CAALFM_C203900CA	hypothetical protein	Ortholog(s) have role in nucleosome mobilization and Ino80 complex, cytosol localization
S516	R.DAEDHDDTS#GGEEVDDRK.K	A0A1D8PGZ6	0.118022	0.00561423	Orf19.835	3637395	CAALFM_C203900CA	hypothetical protein	Ortholog(s) have role in nucleosome mobilization and Ino80 complex, cytosol localization
S544	R.NNPNKPS#PLSK.N	A0A1D8PGZ6	0.74207	0.000957425	Orf19.835	3637395	CAALFM_C203900CA	hypothetical protein	Ortholog(s) have role in nucleosome mobilization and Ino80 complex, cytosol localization
S358,S358	K.SNAKPSLM*S#PNHFDNQK.K	Q5AHI7	0.659298	0.029056	Orf19.809	3637377	CAALFM_C204120CA	hypothetical protein	Ortholog(s) have role in maturation of LSU-rRNA from tricistronic rRNA transcript (SSU-rRNA, 5.8S rRNA, LSU-rRNA) and nucleolus, preribosome, large subunit precursor localization
S76	R.EADGEIQS#TIDNIEK.F	A0A1D8PH30	0.141604	0.0276663	Orf19.808	3637334	CAALFM_C204130WA	Rpd3L histone deacetylase complex subunit	Ortholog(s) have role in histone deacetylation, negative regulation of chromatin silencing at rDNA and negative regulation of chromatin silencing at silent mating-type cassette, more
T141	K.DSNIT#TGDDVK.N	A0A1D8PH30	0.779699	0.00328142	Orf19.808	3637334	CAALFM_C204130WA	Rpd3L histone deacetylase complex subunit	Ortholog(s) have role in histone deacetylation, negative regulation of chromatin silencing at rDNA and negative regulation of chromatin silencing at silent mating-type cassette, more
T265	K.AAT#PVSDLKDK.A	A0A1D8PH30	0.852605	0.00106576	Orf19.808	3637334	CAALFM_C204130WA	Rpd3L histone deacetylase complex subunit	Ortholog(s) have role in histone deacetylation, negative regulation of chromatin silencing at rDNA and negative regulation of chromatin silencing at silent mating-type cassette, more
S262	R.ANS#YDQTKSTFTSLR.S	A0A1D8PH46	-1.27262	0.000133726	Orf19.792	3637326	CAALFM_C204280WA	hypothetical protein	Ortholog(s) have protein serine/threonine kinase activity, protein serine/threonine/tyrosine kinase activity, protein tyrosine kinase activity
Y472,Y472	K.ILNPSEPNVSY#ICSR.Y	A0A1D8PH46	-0.61089	0.00890651	Orf19.792	3637326	CAALFM_C204280WA	hypothetical protein	Ortholog(s) have protein serine/threonine kinase activity, protein serine/threonine/tyrosine kinase activity, protein tyrosine kinase activity
S471,S471	K.ILNPSEPNVS#YICSR.Y	A0A1D8PH46	-0.471799	0.0165394	Orf19.792	3637326	CAALFM_C204280WA	hypothetical protein	Ortholog(s) have protein serine/threonine kinase activity, protein serine/threonine/tyrosine kinase activity, protein tyrosine kinase activity
S641	R.ENS#NSDGQSGKLERPQQLQLQHHR.Q	Q59TB3	-1.29415	0.000328742	Orf19.4518	3645461	CAALFM_C204360WA	non-specific serine/threonine protein kinase	Protein kinase of unknown function; mutants are viable
S822:S825	K.LRS#NSS#EDISEDSYRFNDENM*PM*GR.S	Q59TB3	-1.2566	0.0259498	Orf19.4518	3645461	CAALFM_C204360WA	non-specific serine/threonine protein kinase	Protein kinase of unknown function; mutants are viable
S845	R.S#GSPDLGKKR.S	Q59TB3	-1.00744	0.00055307	Orf19.4518	3645461	CAALFM_C204360WA	non-specific serine/threonine protein kinase	Protein kinase of unknown function; mutants are viable
S406:S412	K.SVLS#LSDQAS#GSQPLER.I	Q59TB3	-0.868807	0.0267357	Orf19.4518	3645461	CAALFM_C204360WA	non-specific serine/threonine protein kinase	Protein kinase of unknown function; mutants are viable
S455	R.KSLDKNDTTQIPPS#PK.S	Q59TB3	-0.606722	0.0434387	Orf19.4518	3645461	CAALFM_C204360WA	non-specific serine/threonine protein kinase	Protein kinase of unknown function; mutants are viable
S513	R.TVS#FVPDGR.R	Q59TB3	-0.542211	0.00135968	Orf19.4518	3645461	CAALFM_C204360WA	non-specific serine/threonine protein kinase	Protein kinase of unknown function; mutants are viable
S412	K.SVLSLSDQAS#GSQPLER.I	Q59TB3	-0.372015	0.0138331	Orf19.4518	3645461	CAALFM_C204360WA	non-specific serine/threonine protein kinase	Protein kinase of unknown function; mutants are viable
S522	R.RLS#QVISSEPKETIK.K	Q59TB3	-0.312995	0.0185217	Orf19.4518	3645461	CAALFM_C204360WA	non-specific serine/threonine protein kinase	Protein kinase of unknown function; mutants are viable
S891	R.APS#PPIGFK.Y	Q59TB3	-0.215047	0.0295682	Orf19.4518	3645461	CAALFM_C204360WA	non-specific serine/threonine protein kinase	Protein kinase of unknown function; mutants are viable
S847	R.SGS#PDLGK.K	Q59TB3	0.249546	0.0407639	Orf19.4518	3645461	CAALFM_C204360WA	non-specific serine/threonine protein kinase	Protein kinase of unknown function; mutants are viable
S847	R.SGS#PDLGKK.R	Q59TB3	0.3313	0.0306916	Orf19.4518	3645461	CAALFM_C204360WA	non-specific serine/threonine protein kinase	Protein kinase of unknown function; mutants are viable
S526	R.LSQVIS#SEPKETIK.K	Q59TB3	0.373625	0.0179727	Orf19.4518	3645461	CAALFM_C204360WA	non-specific serine/threonine protein kinase	Protein kinase of unknown function; mutants are viable
S522:S526	R.RLS#QVIS#SEPK.E	Q59TB3	0.380631	0.00648917	Orf19.4518	3645461	CAALFM_C204360WA	non-specific serine/threonine protein kinase	Protein kinase of unknown function; mutants are viable
S526	R.RLSQVIS#SEPK.E	Q59TB3	0.510998	0.00061228	Orf19.4518	3645461	CAALFM_C204360WA	non-specific serine/threonine protein kinase	Protein kinase of unknown function; mutants are viable
S423	R.IM*SS#LSIASNK.N	Q59TB3	0.647199	0.0163242	Orf19.4518	3645461	CAALFM_C204360WA	non-specific serine/threonine protein kinase	Protein kinase of unknown function; mutants are viable
S423:S425	R.IM*SS#LS#IASNK.N	Q59TB3	0.71472	0.00569143	Orf19.4518	3645461	CAALFM_C204360WA	non-specific serine/threonine protein kinase	Protein kinase of unknown function; mutants are viable
S824	K.LRSNS#SEDISEDSYR.F	Q59TB3	0.729141	0.00119266	Orf19.4518	3645461	CAALFM_C204360WA	non-specific serine/threonine protein kinase	Protein kinase of unknown function; mutants are viable
T289	R.QM*IENGEGM*DIDSKDST#PQFDVTSQQGGNKLVVETK.S	A0A1D8PH70	-0.54988	0.0233232	Orf19.4502	3645462	CAALFM_C204500WA	DNA-binding ATPase	Ortholog(s) have ATPase activity, DNA binding, TBP-class protein binding activity
S719	R.KPDES#TTDIPIEDLK.V	A0A1D8PH70	0.412461	0.00351	Orf19.4502	3645462	CAALFM_C204500WA	DNA-binding ATPase	Ortholog(s) have ATPase activity, DNA binding, TBP-class protein binding activity
S313	K.SSELS#PLLSQQNK.V	A0A1D8PH70	0.939408	0.0149689	Orf19.4502	3645462	CAALFM_C204500WA	DNA-binding ATPase	Ortholog(s) have ATPase activity, DNA binding, TBP-class protein binding activity
S278	K.DVES#ESNQQEGKPEEEEEEEQKK.N	A0A1D8PH73	0.75583	0.00749126	Orf19.4488	3645438	CAALFM_C204620WA	hypothetical protein	Predicted ortholog of S. cerevisiae Swi3, subunit of the SWI/SNF chromatin remodeling complex; possibly an essential gene, disruptants not obtained by UAU1 method
S306	K.NSELSEVKS#NVESTSDQK.E	A0A1D8PH73	1.60269	0.0120956	Orf19.4488	3645438	CAALFM_C204620WA	hypothetical protein	Predicted ortholog of S. cerevisiae Swi3, subunit of the SWI/SNF chromatin remodeling complex; possibly an essential gene, disruptants not obtained by UAU1 method
S357	K.INQSISLPIIDNNGM*PKGNNDGEEEEDS#DFDF.-	A0A1D8PH84	-0.555108	0.00274987	Orf19.154	3647794	CAALFM_C204700CA	hypothetical protein	Putative ortholog of S. cerevisiae Utp30; a U3-containing 90S preribosome complex protein; Hap43-induced; Spider biofilm induced
T470	R.HGST#FNNSIELNTQASTSGLK.F	A0A1D8PH86	-0.861449	0.00491661	Orf19.194	3647787	CAALFM_C204730WA	hypothetical protein	Ortholog of C. dubliniensis CD36 : Cd36_19300, C. parapsilosis CDC317 : CPAR2_209720, Candida tenuis NRRL Y-1498 : CANTEDRAFT_114035 and Debaryomyces hansenii CBS767 : DEHA2E10494g
T494:S497	K.FLGNQTT#FGS#QINYNTQNK.N	A0A1D8PH86	-0.653201	0.00715592	Orf19.194	3647787	CAALFM_C204730WA	hypothetical protein	Ortholog of C. dubliniensis CD36 : Cd36_19300, C. parapsilosis CDC317 : CPAR2_209720, Candida tenuis NRRL Y-1498 : CANTEDRAFT_114035 and Debaryomyces hansenii CBS767 : DEHA2E10494g
S474	R.HGSTFNNS#IELNTQASTSGLK.F	A0A1D8PH86	-0.589503	0.00887947	Orf19.194	3647787	CAALFM_C204730WA	hypothetical protein	Ortholog of C. dubliniensis CD36 : Cd36_19300, C. parapsilosis CDC317 : CPAR2_209720, Candida tenuis NRRL Y-1498 : CANTEDRAFT_114035 and Debaryomyces hansenii CBS767 : DEHA2E10494g
S469	R.HGS#TFNNSIELNTQASTSGLK.F	A0A1D8PH86	-0.487301	0.0256678	Orf19.194	3647787	CAALFM_C204730WA	hypothetical protein	Ortholog of C. dubliniensis CD36 : Cd36_19300, C. parapsilosis CDC317 : CPAR2_209720, Candida tenuis NRRL Y-1498 : CANTEDRAFT_114035 and Debaryomyces hansenii CBS767 : DEHA2E10494g
S330	R.S#RGNSDVDRLGSR.L	A0A1D8PH89	-0.282364	0.0188521	Orf19.4127	3648114	CAALFM_C204850CA	hypothetical protein	Ortholog(s) have actin filament binding activity, role in actin cortical patch localization, actin filament bundle assembly, endocytosis and actin cortical patch localization
T1293	R.TLSSVPT#SPSSLSKENKLQERVNK.M	A0A1D8PH99	-3.76048	0.000845824	Orf19.4123	3648111	CAALFM_C204870CA	hypothetical protein	Putative THO complex subunit; possibly an essential gene, disruptants not obtained by UAU1 method; protein newly produced during adaptation to the serum
T1293	R.TLSSVPT#SPSSLSKENKLQER.V	A0A1D8PH99	-0.733117	0.00016702	Orf19.4123	3648111	CAALFM_C204870CA	hypothetical protein	Putative THO complex subunit; possibly an essential gene, disruptants not obtained by UAU1 method; protein newly produced during adaptation to the serum
S1294	R.TLSSVPTS#PSSLSKENKLQER.V	A0A1D8PH99	-0.670293	0.000222497	Orf19.4123	3648111	CAALFM_C204870CA	hypothetical protein	Putative THO complex subunit; possibly an essential gene, disruptants not obtained by UAU1 method; protein newly produced during adaptation to the serum
T1568	R.NDSRPASSRT#PTYDNR.A	A0A1D8PH99	0.07233	0.0466493	Orf19.4123	3648111	CAALFM_C204870CA	hypothetical protein	Putative THO complex subunit; possibly an essential gene, disruptants not obtained by UAU1 method; protein newly produced during adaptation to the serum
S1294	R.TLSSVPTS#PSSLSK.E	A0A1D8PH99	0.220549	0.0175849	Orf19.4123	3648111	CAALFM_C204870CA	hypothetical protein	Putative THO complex subunit; possibly an essential gene, disruptants not obtained by UAU1 method; protein newly produced during adaptation to the serum
S1294	R.TLSSVPTS#PSSLSKENK.L	A0A1D8PH99	0.34199	0.0274905	Orf19.4123	3648111	CAALFM_C204870CA	hypothetical protein	Putative THO complex subunit; possibly an essential gene, disruptants not obtained by UAU1 method; protein newly produced during adaptation to the serum
T1279	R.QTT#PIPTQPR.T	A0A1D8PH99	0.359644	0.0364142	Orf19.4123	3648111	CAALFM_C204870CA	hypothetical protein	Putative THO complex subunit; possibly an essential gene, disruptants not obtained by UAU1 method; protein newly produced during adaptation to the serum
S1416	K.S#ISSEDFKGPTEPK.R	A0A1D8PH99	0.363329	0.0303553	Orf19.4123	3648111	CAALFM_C204870CA	hypothetical protein	Putative THO complex subunit; possibly an essential gene, disruptants not obtained by UAU1 method; protein newly produced during adaptation to the serum
T1293	R.TLSSVPT#SPSSLSK.E	A0A1D8PH99	0.425753	0.0321613	Orf19.4123	3648111	CAALFM_C204870CA	hypothetical protein	Putative THO complex subunit; possibly an essential gene, disruptants not obtained by UAU1 method; protein newly produced during adaptation to the serum
S175	K.SFANVNGSQTGDNSTIYQSEVGAAVTS#KHDLTK.M	A0A1D8PH92	-0.555847	0.0147537	Orf19.3535	3643449	CAALFM_C205040CA	hypothetical protein	Ortholog(s) have cellular bud neck, fungal-type vacuole localization
S31:S33	K.VAEKLPS#PS#SESER.S	A0A1D8PHC4	0.453408	0.0017076	Orf19.3547	3643461	CAALFM_C205160CA	hypothetical protein	Ortholog(s) have mRNA 3'-UTR binding, translation repressor activity, nucleic acid binding activity, role in negative regulation of translation, ribosomal large subunit biogenesis and large ribosomal subunit, nucleolus localization
S31	K.VAEKLPS#PSSESER.S	A0A1D8PHC4	0.604299	0.000753619	Orf19.3547	3643461	CAALFM_C205160CA	hypothetical protein	Ortholog(s) have mRNA 3'-UTR binding, translation repressor activity, nucleic acid binding activity, role in negative regulation of translation, ribosomal large subunit biogenesis and large ribosomal subunit, nucleolus localization
S34	K.VAEKLPSPSS#ESER.S	A0A1D8PHC4	0.63733	0.000952887	Orf19.3547	3643461	CAALFM_C205160CA	hypothetical protein	Ortholog(s) have mRNA 3'-UTR binding, translation repressor activity, nucleic acid binding activity, role in negative regulation of translation, ribosomal large subunit biogenesis and large ribosomal subunit, nucleolus localization
S14	R.TIVKQSS#TLPTATIHELTK.N	A0A1D8PHC5	-0.469917	0.00194375	Orf19.3552	3643466	CAALFM_C205220CA	hypothetical protein	Ortholog(s) have structural constituent of nuclear pore activity
S179:S183	K.QM*SNGSAIIS#DDDS#ELDQTTPSR.T	A0A1D8PHB9	-0.653953	0.00995296	Orf19.3563	3643426	CAALFM_C205330CA	hypothetical protein	Ortholog of C. dubliniensis CD36 : Cd36_19810, C. parapsilosis CDC317 : CPAR2_206450, Candida tenuis NRRL Y-1498 : CANTEDRAFT_113905 and Debaryomyces hansenii CBS767 : DEHA2C05566g
S111:S115	R.SM*SIVS#LDRS#PR.N	A0A1D8PHB9	0.938221	0.00209694	Orf19.3563	3643426	CAALFM_C205330CA	hypothetical protein	Ortholog of C. dubliniensis CD36 : Cd36_19810, C. parapsilosis CDC317 : CPAR2_206450, Candida tenuis NRRL Y-1498 : CANTEDRAFT_113905 and Debaryomyces hansenii CBS767 : DEHA2C05566g
S122	R.NSIVS#TDDNLR.S	A0A1D8PHB9	1.32328	0.00279806	Orf19.3563	3643426	CAALFM_C205330CA	hypothetical protein	Ortholog of C. dubliniensis CD36 : Cd36_19810, C. parapsilosis CDC317 : CPAR2_206450, Candida tenuis NRRL Y-1498 : CANTEDRAFT_113905 and Debaryomyces hansenii CBS767 : DEHA2C05566g
T129	R.GYT#STEEKFLQEYKK.Y	A0A1D8PHD9	0.652115	0.0164579	Orf19.3569	3643432	CAALFM_C205380WA	hypothetical protein	Protein of unknown function; S. cerevisiae YLR407W mutants have abnormal budding; constitutive expression independent of MTL or white-opaque status; Spider biofilm induced
S130	R.GYTS#TEEKFLQEYK.K	A0A1D8PHD9	0.859203	0.00371971	Orf19.3569	3643432	CAALFM_C205380WA	hypothetical protein	Protein of unknown function; S. cerevisiae YLR407W mutants have abnormal budding; constitutive expression independent of MTL or white-opaque status; Spider biofilm induced
S26	K.S#IAHDDLRQSIVK.E	A0A1D8PHF9	-3.3807	0.00121955	Orf19.3583	3643422	CAALFM_C205530CA	hypothetical protein	Ortholog(s) have role in protein export from nucleus, regulation of chromatin silencing at telomere, ribosomal small subunit export from nucleus and cytosol, nuclear pore, nucleus localization
T24	K.RT#KSIAHDDLR.Q	A0A1D8PHF9	-1.42171	0.000285568	Orf19.3583	3643422	CAALFM_C205530CA	hypothetical protein	Ortholog(s) have role in protein export from nucleus, regulation of chromatin silencing at telomere, ribosomal small subunit export from nucleus and cytosol, nuclear pore, nucleus localization
S13	R.KIDS#DESTSVQLKR.T	A0A1D8PHF9	-0.26797	0.0160603	Orf19.3583	3643422	CAALFM_C205530CA	hypothetical protein	Ortholog(s) have role in protein export from nucleus, regulation of chromatin silencing at telomere, ribosomal small subunit export from nucleus and cytosol, nuclear pore, nucleus localization
S26	R.TKS#IAHDDLR.Q	A0A1D8PHF9	0.177605	0.0483234	Orf19.3583	3643422	CAALFM_C205530CA	hypothetical protein	Ortholog(s) have role in protein export from nucleus, regulation of chromatin silencing at telomere, ribosomal small subunit export from nucleus and cytosol, nuclear pore, nucleus localization
S70	K.LEEEFPNEEEEKS#EEEKEEEKETK.K	A0A1D8PHF9	1.23936	0.0315077	Orf19.3583	3643422	CAALFM_C205530CA	hypothetical protein	Ortholog(s) have role in protein export from nucleus, regulation of chromatin silencing at telomere, ribosomal small subunit export from nucleus and cytosol, nuclear pore, nucleus localization
S41	R.STKPIS#PM*SSIKNEIDKYLTSELPERESK.A	A0A1D8PHF1	-0.22282	0.0364001	Orf19.6866	3645559	CAALFM_C205540CA	U1 snRNP complex subunit	Putative U1-70K component of the U1 snRNP, involved in splicing; ortholog of S. cerevisiae SNP1; downregulated upon adherence to polystyrene
T844	R.DQNGFFEQSTNGETT#PPTSSTSNISHK.V	Q59T47	-2.41297	0.0217366	Orf19.6871	3645563	CAALFM_C205580WA	hypothetical protein	Protein of unknown function; Hap43-induced; flow model biofilm repressed
S580	R.KKPPVSPADANFGPVSS#NDSVQNSVK.D	Q59T47	-1.5195	0.00688653	Orf19.6871	3645563	CAALFM_C205580WA	hypothetical protein	Protein of unknown function; Hap43-induced; flow model biofilm repressed
T1024	R.T#SSIDENDSTLNPILSR.N	Q59T47	-1.2769	0.0338602	Orf19.6871	3645563	CAALFM_C205580WA	hypothetical protein	Protein of unknown function; Hap43-induced; flow model biofilm repressed
S928:T932	R.S#QDKT#PDFTQFNNNNNNSK.L	Q59T47	-1.08518	0.00437885	Orf19.6871	3645563	CAALFM_C205580WA	hypothetical protein	Protein of unknown function; Hap43-induced; flow model biofilm repressed
S355	R.S#M*SLM*NGGM*PQNYPR.T	Q59T47	-1.04388	0.019724	Orf19.6871	3645563	CAALFM_C205580WA	hypothetical protein	Protein of unknown function; Hap43-induced; flow model biofilm repressed
T340	R.T#M*SLM*NGGM*PNNGPR.S	Q59T47	-0.794113	0.0109065	Orf19.6871	3645563	CAALFM_C205580WA	hypothetical protein	Protein of unknown function; Hap43-induced; flow model biofilm repressed
S372	K.S#LGTSGPPLGYQGPPLR.S	Q59T47	-0.533882	0.0453186	Orf19.6871	3645563	CAALFM_C205580WA	hypothetical protein	Protein of unknown function; Hap43-induced; flow model biofilm repressed
S1026	R.TSS#IDENDSTLNPILSR.N	Q59T47	-0.507094	0.0086305	Orf19.6871	3645563	CAALFM_C205580WA	hypothetical protein	Protein of unknown function; Hap43-induced; flow model biofilm repressed
S819	R.KM*SKYDLNNS#DTDDSEIR.R	Q59T47	-0.21666	0.027826	Orf19.6871	3645563	CAALFM_C205580WA	hypothetical protein	Protein of unknown function; Hap43-induced; flow model biofilm repressed
S773:T774	K.FRSPSAES#T#PK.F	Q59T47	0.260556	0.0227867	Orf19.6871	3645563	CAALFM_C205580WA	hypothetical protein	Protein of unknown function; Hap43-induced; flow model biofilm repressed
Y814:S819	R.KM*SKY#DLNNS#DTDDSEIR.R	Q59T47	0.261804	0.0158817	Orf19.6871	3645563	CAALFM_C205580WA	hypothetical protein	Protein of unknown function; Hap43-induced; flow model biofilm repressed
S770:S773:T774	K.FRSPS#AES#T#PK.F	Q59T47	0.318762	0.0410307	Orf19.6871	3645563	CAALFM_C205580WA	hypothetical protein	Protein of unknown function; Hap43-induced; flow model biofilm repressed
S1004	R.SS#FSLNGTK.N	Q59T47	0.359212	0.029954	Orf19.6871	3645563	CAALFM_C205580WA	hypothetical protein	Protein of unknown function; Hap43-induced; flow model biofilm repressed
S264	R.TM*S#LNSQGPR.T	Q59T47	0.359234	0.0215902	Orf19.6871	3645563	CAALFM_C205580WA	hypothetical protein	Protein of unknown function; Hap43-induced; flow model biofilm repressed
S812:S819	R.KM*S#KYDLNNS#DTDDSEIR.R	Q59T47	0.430379	0.00154155	Orf19.6871	3645563	CAALFM_C205580WA	hypothetical protein	Protein of unknown function; Hap43-induced; flow model biofilm repressed
S114	R.KS#SM*TSQTAAGVNR.F	Q59T47	0.440756	0.0053333	Orf19.6871	3645563	CAALFM_C205580WA	hypothetical protein	Protein of unknown function; Hap43-induced; flow model biofilm repressed
S1043	R.NSS#M*TQASKQPLFNK.R	Q59T47	0.457309	0.000550399	Orf19.6871	3645563	CAALFM_C205580WA	hypothetical protein	Protein of unknown function; Hap43-induced; flow model biofilm repressed
T370	R.T#KSLGTSGPPLGYQGPPLR.S	Q59T47	0.506573	0.00340273	Orf19.6871	3645563	CAALFM_C205580WA	hypothetical protein	Protein of unknown function; Hap43-induced; flow model biofilm repressed
S684:S688	K.IGS#PHTS#PQK.S	Q59T47	0.555385	0.0112274	Orf19.6871	3645563	CAALFM_C205580WA	hypothetical protein	Protein of unknown function; Hap43-induced; flow model biofilm repressed
S1006	R.SSFS#LNGTK.N	Q59T47	0.584067	0.031108	Orf19.6871	3645563	CAALFM_C205580WA	hypothetical protein	Protein of unknown function; Hap43-induced; flow model biofilm repressed
T932	R.SQDKT#PDFTQFNNNNNNSK.L	Q59T47	0.626055	0.00519302	Orf19.6871	3645563	CAALFM_C205580WA	hypothetical protein	Protein of unknown function; Hap43-induced; flow model biofilm repressed
S768	K.FRS#PSAESTPK.F	Q59T47	0.664065	0.0247912	Orf19.6871	3645563	CAALFM_C205580WA	hypothetical protein	Protein of unknown function; Hap43-induced; flow model biofilm repressed
S770	K.FRSPS#AESTPK.F	Q59T47	0.724874	0.000125708	Orf19.6871	3645563	CAALFM_C205580WA	hypothetical protein	Protein of unknown function; Hap43-induced; flow model biofilm repressed
S819	K.M*SKYDLNNS#DTDDSEIR.R	Q59T47	0.863902	0.000451825	Orf19.6871	3645563	CAALFM_C205580WA	hypothetical protein	Protein of unknown function; Hap43-induced; flow model biofilm repressed
S1004	K.RSS#FSLNGTK.N	Q59T47	0.870197	0.0011434	Orf19.6871	3645563	CAALFM_C205580WA	hypothetical protein	Protein of unknown function; Hap43-induced; flow model biofilm repressed
S797:T807	R.QQQGS#ETSSVYESNT#PR.K	Q59T47	0.909598	0.0387808	Orf19.6871	3645563	CAALFM_C205580WA	hypothetical protein	Protein of unknown function; Hap43-induced; flow model biofilm repressed
S956	K.LGNVELEQDS#LPK.S	Q59T47	1.03956	0.000129116	Orf19.6871	3645563	CAALFM_C205580WA	hypothetical protein	Protein of unknown function; Hap43-induced; flow model biofilm repressed
S770:S773	K.FRSPS#AES#TPKFSSPAIANR.F	Q59T47	1.14835	0.000201183	Orf19.6871	3645563	CAALFM_C205580WA	hypothetical protein	Protein of unknown function; Hap43-induced; flow model biofilm repressed
T807	R.QQQGSETSSVYESNT#PR.K	Q59T47	1.52149	0.0181963	Orf19.6871	3645563	CAALFM_C205580WA	hypothetical protein	Protein of unknown function; Hap43-induced; flow model biofilm repressed
S801:T807	R.QQQGSETSS#VYESNT#PR.K	Q59T47	1.63562	0.0165361	Orf19.6871	3645563	CAALFM_C205580WA	hypothetical protein	Protein of unknown function; Hap43-induced; flow model biofilm repressed
S345	K.SLHPSSLSSS#TPPPPENHQAAAGSSPLK.S	Q59T43	-2.68477	0.0304734	Orf19.6874	3645566	CAALFM_C205640WA	hypothetical protein	Putative helix-loop-helix (HLH) transcription factor with a role in filamentous growth
T346	K.SLHPSSLSSST#PPPPENHQAAAGSSPLK.S	Q59T43	-1.96821	0.026581	Orf19.6874	3645566	CAALFM_C205640WA	hypothetical protein	Putative helix-loop-helix (HLH) transcription factor with a role in filamentous growth
S400:S401	R.RHS#S#VSSTIFHNQK.N	Q59T43	-1.54109	0.00950852	Orf19.6874	3645566	CAALFM_C205640WA	hypothetical protein	Putative helix-loop-helix (HLH) transcription factor with a role in filamentous growth
S511	R.RESQNSSFNS#PM*LTPSTR.F	Q59T43	-0.982906	0.0181731	Orf19.6874	3645566	CAALFM_C205640WA	hypothetical protein	Putative helix-loop-helix (HLH) transcription factor with a role in filamentous growth
S242	R.KS#PTPETATINSEAEM*TNKQDSTYSK.S	Q59T43	-0.915175	0.0218871	Orf19.6874	3645566	CAALFM_C205640WA	hypothetical protein	Putative helix-loop-helix (HLH) transcription factor with a role in filamentous growth
S507:S511	R.ESQNS#SFNS#PM*LTPSTR.F	Q59T43	-0.71662	0.0299707	Orf19.6874	3645566	CAALFM_C205640WA	hypothetical protein	Putative helix-loop-helix (HLH) transcription factor with a role in filamentous growth
S477:T478	R.RSS#T#FNSDLFPNPLAK.E	Q59T43	0.285058	0.0170595	Orf19.6874	3645566	CAALFM_C205640WA	hypothetical protein	Putative helix-loop-helix (HLH) transcription factor with a role in filamentous growth
S423	K.NVSHPNLLLVHS#AR.T	Q59T43	0.319233	0.0319035	Orf19.6874	3645566	CAALFM_C205640WA	hypothetical protein	Putative helix-loop-helix (HLH) transcription factor with a role in filamentous growth
S477	R.RSS#TFNSDLFPNPLAK.E	Q59T43	0.356086	0.0010585	Orf19.6874	3645566	CAALFM_C205640WA	hypothetical protein	Putative helix-loop-helix (HLH) transcription factor with a role in filamentous growth
S414	K.NVS#HPNLLLVHSAR.T	Q59T43	0.43827	0.0297729	Orf19.6874	3645566	CAALFM_C205640WA	hypothetical protein	Putative helix-loop-helix (HLH) transcription factor with a role in filamentous growth
S414:S423	K.NVS#HPNLLLVHS#AR.T	Q59T43	0.610617	0.00145361	Orf19.6874	3645566	CAALFM_C205640WA	hypothetical protein	Putative helix-loop-helix (HLH) transcription factor with a role in filamentous growth
S558	K.NAYSASSTS#INLPVEEEEPETGADKQK.I	Q59T43	1.26706	0.0449058	Orf19.6874	3645566	CAALFM_C205640WA	hypothetical protein	Putative helix-loop-helix (HLH) transcription factor with a role in filamentous growth
S307	R.LPS#FHQLPQIAFK.T	Q59T43	1.56913	0.000117806	Orf19.6874	3645566	CAALFM_C205640WA	hypothetical protein	Putative helix-loop-helix (HLH) transcription factor with a role in filamentous growth
S21	K.S#VTNPNVSLIQIEGVASPK.D	A0A1D8PHH4	-0.617563	0.0323104	0	30515127	CAALFM_C205710CA	ribosomal 60S subunit protein L33A	#N/A
S330	K.VAEAIKKS#DYNLIATEKTLIENEQR.K	A0A1D8PHG1	-1.00436	0.00733666	Orf19.6883	3645574	CAALFM_C205720CA	oxysterol-binding protein	Putative oxysterol binding protein family; probable peripheral membrane protein of the Golgi complex; flow model and Spider biofilm repressed
S330	K.VAEAIKKS#DYNLIATEK.T	A0A1D8PHG1	0.43514	0.0153577	Orf19.6883	3645574	CAALFM_C205720CA	oxysterol-binding protein	Putative oxysterol binding protein family; probable peripheral membrane protein of the Golgi complex; flow model and Spider biofilm repressed
S51	K.QTIDNVNKDEEIQETEPSEDTTSNES#EEESTKSQK.I	A0A1D8PHG9	0.534204	0.00997672	Orf19.6893	3645584	CAALFM_C205800CA	hypothetical protein	Ortholog(s) have GTPase binding activity, role in ER to Golgi vesicle-mediated transport and Golgi membrane localization
S350	R.HSS#LPLDTSGISHR.L	Q59MG4	-1.40583	0.00276841	Orf19.5204	3647481	CAALFM_C205810WA	hypothetical protein	Ortholog(s) have role in cellular response to methylmercury and cytoplasm, nucleus localization
S270	R.GGS#GGGVGSQQDTFNVNPGPPLSFR.F	Q59MG4	-0.400318	0.0390542	Orf19.5204	3647481	CAALFM_C205810WA	hypothetical protein	Ortholog(s) have role in cellular response to methylmercury and cytoplasm, nucleus localization
S29	R.SAS#SGGSIAEEKAESEPSLQPPFQGQNKR.T	Q59MG4	-0.311085	0.0178818	Orf19.5204	3647481	CAALFM_C205810WA	hypothetical protein	Ortholog(s) have role in cellular response to methylmercury and cytoplasm, nucleus localization
S458	K.S#SPSIPFQEQQILRPTK.E	Q59MG4	0.378841	0.0481434	Orf19.5204	3647481	CAALFM_C205810WA	hypothetical protein	Ortholog(s) have role in cellular response to methylmercury and cytoplasm, nucleus localization
S259	K.GGSFSQGS#PFQK.S	Q59MG4	0.450574	0.0381149	Orf19.5204	3647481	CAALFM_C205810WA	hypothetical protein	Ortholog(s) have role in cellular response to methylmercury and cytoplasm, nucleus localization
S531	R.SES#NFAK.F	Q59MG4	0.601515	0.00999574	Orf19.5204	3647481	CAALFM_C205810WA	hypothetical protein	Ortholog(s) have role in cellular response to methylmercury and cytoplasm, nucleus localization
S138	R.SAS#PGLESLSKSELTPR.I	A0A1D8PHH9	-0.446464	0.00815008	Orf19.5213	3647476	CAALFM_C205910WA	hypothetical protein	Putative protein of unknown function; transcript is upregulated in clinical isolates from HIV+ patients with oral candidiasis
S136	R.S#ASPGLESLSK.S	A0A1D8PHH9	0.408672	0.0179676	Orf19.5213	3647476	CAALFM_C205910WA	hypothetical protein	Putative protein of unknown function; transcript is upregulated in clinical isolates from HIV+ patients with oral candidiasis
S138	R.SAS#PGLESLSK.S	A0A1D8PHH9	0.415761	0.0013929	Orf19.5213	3647476	CAALFM_C205910WA	hypothetical protein	Putative protein of unknown function; transcript is upregulated in clinical isolates from HIV+ patients with oral candidiasis
S369	K.DIDKLAS#QTTSTR.S	A0A1D8PHJ1	-0.0550995	0.0389287	Orf19.4117	3644070	CAALFM_C206030WA	hypothetical protein	Ortholog of C. dubliniensis CD36 : Cd36_20450, C. parapsilosis CDC317 : CPAR2_104160, Candida tenuis NRRL Y-1498 : CANTEDRAFT_95516 and Debaryomyces hansenii CBS767 : DEHA2F05192g
S256	R.TS#TVDEQLPLYIR.N	A0A1D8PHP5	-1.42742	0.00615871	Orf19.27	3646570	CAALFM_C206510WA	hypothetical protein	Ortholog of C. dubliniensis CD36 : Cd36_20860, C. parapsilosis CDC317 : CPAR2_104250, Candida tenuis NRRL Y-1498 : CANTEDRAFT_115100 and Debaryomyces hansenii CBS767 : DEHA2E10450g
S361:S364	R.YYSDELDDEDNREYIS#PDS#LTR.Y	A0A1D8PHP5	-0.665058	0.00315379	Orf19.27	3646570	CAALFM_C206510WA	hypothetical protein	Ortholog of C. dubliniensis CD36 : Cd36_20860, C. parapsilosis CDC317 : CPAR2_104250, Candida tenuis NRRL Y-1498 : CANTEDRAFT_115100 and Debaryomyces hansenii CBS767 : DEHA2E10450g
S361	R.YYSDELDDEDNREYIS#PDSLTR.Y	A0A1D8PHP5	-0.514372	0.0468266	Orf19.27	3646570	CAALFM_C206510WA	hypothetical protein	Ortholog of C. dubliniensis CD36 : Cd36_20860, C. parapsilosis CDC317 : CPAR2_104250, Candida tenuis NRRL Y-1498 : CANTEDRAFT_115100 and Debaryomyces hansenii CBS767 : DEHA2E10450g
S39	K.ISS#QSKASTPSVSTSALK.K	A0A1D8PHP6	-1.51411	0.0267617	Orf19.35	3646563	CAALFM_C206600WA	hypothetical protein	Predicted kinase; rat catheter, flow model, Spider biofilm induced
S381	K.RKES#AEENICLQQQSQM*K.F	A0A1D8PHP6	-0.285565	0.0194245	Orf19.35	3646563	CAALFM_C206600WA	hypothetical protein	Predicted kinase; rat catheter, flow model, Spider biofilm induced
S519	K.KIKS#LNSQSLIK.L	A0A1D8PHP6	0.383175	0.000535418	Orf19.35	3646563	CAALFM_C206600WA	hypothetical protein	Predicted kinase; rat catheter, flow model, Spider biofilm induced
S519:S524	K.IKS#LNSQS#LIK.L	A0A1D8PHP6	0.397597	0.0062037	Orf19.35	3646563	CAALFM_C206600WA	hypothetical protein	Predicted kinase; rat catheter, flow model, Spider biofilm induced
S680	K.NSIVGKYES#PIR.C	A0A1D8PHP6	0.583172	0.0133855	Orf19.35	3646563	CAALFM_C206600WA	hypothetical protein	Predicted kinase; rat catheter, flow model, Spider biofilm induced
S519	K.IKS#LNSQSLIK.L	A0A1D8PHP6	0.590364	0.00398378	Orf19.35	3646563	CAALFM_C206600WA	hypothetical protein	Predicted kinase; rat catheter, flow model, Spider biofilm induced
S673	K.SKNS#IVGKYESPIR.C	A0A1D8PHP6	1.05146	0.00858343	Orf19.35	3646563	CAALFM_C206600WA	hypothetical protein	Predicted kinase; rat catheter, flow model, Spider biofilm induced
S401:S402	R.SIVTAEQTYYPS#S#DEEEDGFHRDRPETYGK.L	Q59Z47	-1.05216	0.0134207	Orf19.2253	3643531	CAALFM_C206990WA	hypothetical protein	Protein of unknown function; expression regulated by white-opaque switch; repressed by alpha pheromone in SpiderM medium; Spider biofilm induced
S70	K.S#LDFQAIQQK.S	A0A1D8PHT4	0.438988	0.00458616	Orf19.2265	3643504	CAALFM_C207100WA	hypothetical protein	Ortholog(s) have DNA translocase activity, role in positive regulation of transcription from RNA polymerase II promoter in response to amino acid starvation and SWI/SNF complex, cytosol localization
S70	R.KS#LDFQAIQQK.S	A0A1D8PHT4	1.03308	0.00619403	Orf19.2265	3643504	CAALFM_C207100WA	hypothetical protein	Ortholog(s) have DNA translocase activity, role in positive regulation of transcription from RNA polymerase II promoter in response to amino acid starvation and SWI/SNF complex, cytosol localization
S9	-.M*YDANNEHS#ADDKLTAR.E	Q59U53	-0.994835	0.00195741	Orf19.1900	3645236	CAALFM_C207360WA	RNA methyltransferase	Ortholog(s) have RNA methyltransferase activity, role in 7-methylguanosine cap hypermethylation, meiotic nuclear division, nucleologenesis, regulation of telomere maintenance via telomerase and nucleolus localization
S9	-.YDANNEHS#ADDKLTAR.E	Q59U53	-0.94551	1.30501e-05	Orf19.1900	3645236	CAALFM_C207360WA	RNA methyltransferase	Ortholog(s) have RNA methyltransferase activity, role in 7-methylguanosine cap hypermethylation, meiotic nuclear division, nucleologenesis, regulation of telomere maintenance via telomerase and nucleolus localization
S20	R.ELS#PQSVPINLEANKITK.K	Q59U53	-0.576587	0.00908658	Orf19.1900	3645236	CAALFM_C207360WA	RNA methyltransferase	Ortholog(s) have RNA methyltransferase activity, role in 7-methylguanosine cap hypermethylation, meiotic nuclear division, nucleologenesis, regulation of telomere maintenance via telomerase and nucleolus localization
S20	R.ELS#PQSVPINLEANKITKK.R	Q59U53	-0.390505	0.00655805	Orf19.1900	3645236	CAALFM_C207360WA	RNA methyltransferase	Ortholog(s) have RNA methyltransferase activity, role in 7-methylguanosine cap hypermethylation, meiotic nuclear division, nucleologenesis, regulation of telomere maintenance via telomerase and nucleolus localization
S182	R.KDEHLPSQS#PTPQVDTERIDSTK.K	A0A1D8PHV7	-0.685061	0.000174351	Orf19.1893	3645229	CAALFM_C207390CA	hypothetical protein	Protein of unknown function; Spider biofilm repressed
S180:S182	R.KDEHLPS#QS#PTPQVDTERIDSTK.K	A0A1D8PHV7	-0.527206	0.021796	Orf19.1893	3645229	CAALFM_C207390CA	hypothetical protein	Protein of unknown function; Spider biofilm repressed
S231	K.GFGFVKFHS#PDIM*NR.A	A0A1D8PHZ3	-2.47492	0.000244613	Orf19.1876	3645207	CAALFM_C207520CA	hypothetical protein	Ortholog(s) have mRNA binding activity, role in mRNA splice site selection, positive regulation of mRNA splicing, via spliceosome and U1 snRNP, U2-type prespliceosome, commitment complex, cytoplasm localization
S113	K.IILEKGEDKSKTGSIGEIGGSHNDS#IGNGDAAN.-	Q59U89	-0.939532	0.0188208	Orf19.1862	3645193	CAALFM_C207630CA	hypothetical protein	Possible stress protein; increased transcription associated with CDR1 and CDR2 overexpression or fluphenazine treatment; regulated by Sfu1, Nrg1, Tup1; stationary phase enriched protein; Spider biofilm induced
S98	K.GEDKS#KTGSIGEIGGSHNDSIGNGDAAN.-	Q59U89	-0.741972	0.012197	Orf19.1862	3645193	CAALFM_C207630CA	hypothetical protein	Possible stress protein; increased transcription associated with CDR1 and CDR2 overexpression or fluphenazine treatment; regulated by Sfu1, Nrg1, Tup1; stationary phase enriched protein; Spider biofilm induced
S443	R.HSVLVS#PM*SSAGASR.L	Q59U90	-0.24072	0.0204566	Orf19.1861	3645192	CAALFM_C207640WA	hypothetical protein	BAR domain-containing protein, forms heterodimer with Rvs162p that binds liposomes in vitro; flow model biofilm induced
T356	K.YNRVDDSITM*QDFIIT#DDEEEENVRGRP.-	A0A1D8PHZ9	-0.668601	0.00819654	Orf19.2204	3642298	CAALFM_C207760WA	hypothetical protein	Predicted membrane protein of unknown function; Spider biofilm induced
T356	R.VDDSITM*QDFIIT#DDEEEENVRGRP.-	A0A1D8PHZ9	-0.565536	0.00233486	Orf19.2204	3642298	CAALFM_C207760WA	hypothetical protein	Predicted membrane protein of unknown function; Spider biofilm induced
S436	R.LM*YQS#DEDEPDDTYDDQEKTTGV.-	A0A1D8PI66	-0.868053	0.0238413	Orf19.2196	3642320	CAALFM_C207860WA	hypothetical protein	Ortholog(s) have ubiquitin binding activity and cytoplasm localization
S180	K.HNIS#RDSLETTKTTATTSSK.Q	Q5A2T4	-0.563973	0.00067742	Orf19.2180	3642308	CAALFM_C208020CA	hypothetical protein	Ortholog(s) have calcium ion binding, zinc ion binding activity, role in axial cellular bud site selection, bipolar cellular bud site selection, regulation of COPII vesicle coating and cellular bud neck, cytosol, nucleus localization
S180:S183	K.HNIS#RDS#LETTKTTATTSSK.Q	Q5A2T4	0.164629	0.0271187	Orf19.2180	3642308	CAALFM_C208020CA	hypothetical protein	Ortholog(s) have calcium ion binding, zinc ion binding activity, role in axial cellular bud site selection, bipolar cellular bud site selection, regulation of COPII vesicle coating and cellular bud neck, cytosol, nucleus localization
S180	K.HNIS#RDSLETTK.T	Q5A2T4	0.542931	0.0120689	Orf19.2180	3642308	CAALFM_C208020CA	hypothetical protein	Ortholog(s) have calcium ion binding, zinc ion binding activity, role in axial cellular bud site selection, bipolar cellular bud site selection, regulation of COPII vesicle coating and cellular bud neck, cytosol, nucleus localization
S180:S183	K.HNIS#RDS#LETTK.T	Q5A2T4	1.01246	0.0043555	Orf19.2180	3642308	CAALFM_C208020CA	hypothetical protein	Ortholog(s) have calcium ion binding, zinc ion binding activity, role in axial cellular bud site selection, bipolar cellular bud site selection, regulation of COPII vesicle coating and cellular bud neck, cytosol, nucleus localization
S183	K.HNISRDS#LETTK.T	Q5A2T4	1.08234	0.0014864	Orf19.2180	3642308	CAALFM_C208020CA	hypothetical protein	Ortholog(s) have calcium ion binding, zinc ion binding activity, role in axial cellular bud site selection, bipolar cellular bud site selection, regulation of COPII vesicle coating and cellular bud neck, cytosol, nucleus localization
S189	K.KQLS#DEEQR.K	A0A1D8PI86	-0.211846	0.0211672	Orf19.2167	3642317	CAALFM_C208180CA	ribosome biosynthesis protein	Ortholog(s) have role in ribosomal large subunit biogenesis, ribosomal small subunit biogenesis and cytosolic large ribosomal subunit, nucleolus localization
S96:T102	R.SM*SVGSITEDSGAAGAAGDRS#RM*NSIT#E.-	A0A1D8PI29	-1.1213	0.00375566	Orf19.2220	3642345	CAALFM_C208260WA	hypothetical protein	Protein of unknown function; Hap43-repressed gene; by Rgt1; repressed in Spider biofilms by Bcr1, Tec1, Brg1, Rob1 and induced by Efg1, Ndt80; Spider biofilm induced
S770	K.RSPIQEVTTPQITGDS#PPPPPPIEKSPGM*R.V	A0A1D8PI53	-0.850228	0.000931419	Orf19.3635	3643905	CAALFM_C208450WA	hypothetical protein	Ortholog of C. dubliniensis CD36 : Cd36_22580, C. parapsilosis CDC317 : CPAR2_406960, Candida tenuis NRRL Y-1498 : CANTEDRAFT_113677 and Debaryomyces hansenii CBS767 : DEHA2D03608g
S971	K.KTKS#LPSVVSDK.S	A0A1D8PI53	-0.673374	0.00379937	Orf19.3635	3643905	CAALFM_C208450WA	hypothetical protein	Ortholog of C. dubliniensis CD36 : Cd36_22580, C. parapsilosis CDC317 : CPAR2_406960, Candida tenuis NRRL Y-1498 : CANTEDRAFT_113677 and Debaryomyces hansenii CBS767 : DEHA2D03608g
S507	K.DTPKLAPPS#PTSLK.T	A0A1D8PI53	-0.6293	0.000877142	Orf19.3635	3643905	CAALFM_C208450WA	hypothetical protein	Ortholog of C. dubliniensis CD36 : Cd36_22580, C. parapsilosis CDC317 : CPAR2_406960, Candida tenuis NRRL Y-1498 : CANTEDRAFT_113677 and Debaryomyces hansenii CBS767 : DEHA2D03608g
S770	K.RSPIQEVTTPQITGDS#PPPPPPIEK.S	A0A1D8PI53	0.191488	0.040804	Orf19.3635	3643905	CAALFM_C208450WA	hypothetical protein	Ortholog of C. dubliniensis CD36 : Cd36_22580, C. parapsilosis CDC317 : CPAR2_406960, Candida tenuis NRRL Y-1498 : CANTEDRAFT_113677 and Debaryomyces hansenii CBS767 : DEHA2D03608g
S1100	K.SM*EKSES#TTSLASAGSAGSR.L	A0A1D8PI53	0.342415	0.0416896	Orf19.3635	3643905	CAALFM_C208450WA	hypothetical protein	Ortholog of C. dubliniensis CD36 : Cd36_22580, C. parapsilosis CDC317 : CPAR2_406960, Candida tenuis NRRL Y-1498 : CANTEDRAFT_113677 and Debaryomyces hansenii CBS767 : DEHA2D03608g
S724	R.NAS#STSSAGDFFNPQKK.T	A0A1D8PI53	0.350566	0.0304626	Orf19.3635	3643905	CAALFM_C208450WA	hypothetical protein	Ortholog of C. dubliniensis CD36 : Cd36_22580, C. parapsilosis CDC317 : CPAR2_406960, Candida tenuis NRRL Y-1498 : CANTEDRAFT_113677 and Debaryomyces hansenii CBS767 : DEHA2D03608g
S980	K.TKSLPSVVSDKS#QVPDILVPSSEK.L	A0A1D8PI53	0.427683	0.001844	Orf19.3635	3643905	CAALFM_C208450WA	hypothetical protein	Ortholog of C. dubliniensis CD36 : Cd36_22580, C. parapsilosis CDC317 : CPAR2_406960, Candida tenuis NRRL Y-1498 : CANTEDRAFT_113677 and Debaryomyces hansenii CBS767 : DEHA2D03608g
S507	K.LAPPS#PTSLK.T	A0A1D8PI53	0.438469	0.00528599	Orf19.3635	3643905	CAALFM_C208450WA	hypothetical protein	Ortholog of C. dubliniensis CD36 : Cd36_22580, C. parapsilosis CDC317 : CPAR2_406960, Candida tenuis NRRL Y-1498 : CANTEDRAFT_113677 and Debaryomyces hansenii CBS767 : DEHA2D03608g
T969	K.T#KSLPSVVSDKSQVPDILVPSSEK.L	A0A1D8PI53	0.464465	0.00142148	Orf19.3635	3643905	CAALFM_C208450WA	hypothetical protein	Ortholog of C. dubliniensis CD36 : Cd36_22580, C. parapsilosis CDC317 : CPAR2_406960, Candida tenuis NRRL Y-1498 : CANTEDRAFT_113677 and Debaryomyces hansenii CBS767 : DEHA2D03608g
S971	K.TKS#LPSVVSDK.S	A0A1D8PI53	0.72521	0.00148834	Orf19.3635	3643905	CAALFM_C208450WA	hypothetical protein	Ortholog of C. dubliniensis CD36 : Cd36_22580, C. parapsilosis CDC317 : CPAR2_406960, Candida tenuis NRRL Y-1498 : CANTEDRAFT_113677 and Debaryomyces hansenii CBS767 : DEHA2D03608g
S954	K.NLGNSSNKS#ESKLNELPAK.T	A0A1D8PI53	0.879495	0.0301437	Orf19.3635	3643905	CAALFM_C208450WA	hypothetical protein	Ortholog of C. dubliniensis CD36 : Cd36_22580, C. parapsilosis CDC317 : CPAR2_406960, Candida tenuis NRRL Y-1498 : CANTEDRAFT_113677 and Debaryomyces hansenii CBS767 : DEHA2D03608g
S971	K.S#LPSVVSDKSQVPDILVPSSEK.L	A0A1D8PI53	1.94599	0.000413027	Orf19.3635	3643905	CAALFM_C208450WA	hypothetical protein	Ortholog of C. dubliniensis CD36 : Cd36_22580, C. parapsilosis CDC317 : CPAR2_406960, Candida tenuis NRRL Y-1498 : CANTEDRAFT_113677 and Debaryomyces hansenii CBS767 : DEHA2D03608g
S135	R.RTEYIS#DRPLSK.G	Q59Y36	-0.285142	0.0120095	Orf19.3613	3643910	CAALFM_C208630CA	hypothetical protein	Ortholog(s) have RNA polymerase II C-terminal domain phosphoserine binding, RNA polymerase II core binding, chromatin binding and transcription factor activity, more
T249	K.GITSM*RDDITTIDLDSLRPTENKEVT#PPPPPLPR.L	Q59Y39	-0.816489	0.0327683	Orf19.3610	3643907	CAALFM_C208660CA	hypothetical protein	Protein of unknown function; upregulation correlates with clinical development of fluconazole resistance; regulated by Sef1, Sfu1, and Hap43
T217	R.QTLDPELLLT#DEEDEYDPSTYNDLSKM*TER.Q	A0A1D8PIC9	-3.37343	2.22883e-05	Orf19.3604	3643885	CAALFM_C208720WA	hypothetical protein	Ortholog(s) have Ino80 complex localization
T288	K.SKLDHDQQQQEEET#EEEIALRR.A	A0A1D8PIC9	-1.3655	0.00278588	Orf19.3604	3643885	CAALFM_C208720WA	hypothetical protein	Ortholog(s) have Ino80 complex localization
S83	K.ASEEEEDEDTES#PQPVSKPIKK.S	A0A1D8PIC9	-0.540167	0.0123706	Orf19.3604	3643885	CAALFM_C208720WA	hypothetical protein	Ortholog(s) have Ino80 complex localization
T217	R.QTLDPELLLT#DEEDEYDPSTYNDLSK.M	A0A1D8PIC9	-0.196098	0.00471712	Orf19.3604	3643885	CAALFM_C208720WA	hypothetical protein	Ortholog(s) have Ino80 complex localization
S73	K.AS#EEEEDEDTESPQPVSKPIKK.S	A0A1D8PIC9	0.356101	0.00881731	Orf19.3604	3643885	CAALFM_C208720WA	hypothetical protein	Ortholog(s) have Ino80 complex localization
S137:T143	R.S#ASTPLT#PPK.V	A0A1D8PI94	-0.993234	0.000983035	Orf19.223	3645776	CAALFM_C208860WA	serine/threonine protein kinase	Putative serine/threonine protein kinase; Hap43-repressed; induced by prostaglandins; possibly an essential gene, disruptants not obtained by UAU1 method; flow model biofilm induced; Spider biofilm induced
S579	R.TNS#FVGTEEYIAPEVIRGK.G	A0A1D8PI94	-0.714147	0.00216828	Orf19.223	3645776	CAALFM_C208860WA	serine/threonine protein kinase	Putative serine/threonine protein kinase; Hap43-repressed; induced by prostaglandins; possibly an essential gene, disruptants not obtained by UAU1 method; flow model biofilm induced; Spider biofilm induced
T577	R.T#NSFVGTEEYIAPEVIR.G	A0A1D8PI94	-0.676694	0.00158213	Orf19.223	3645776	CAALFM_C208860WA	serine/threonine protein kinase	Putative serine/threonine protein kinase; Hap43-repressed; induced by prostaglandins; possibly an essential gene, disruptants not obtained by UAU1 method; flow model biofilm induced; Spider biofilm induced
S579	K.ACIDGFRTNS#FVGTEEYIAPEVIR.G	A0A1D8PI94	-0.590234	0.0402975	Orf19.223	3645776	CAALFM_C208860WA	serine/threonine protein kinase	Putative serine/threonine protein kinase; Hap43-repressed; induced by prostaglandins; possibly an essential gene, disruptants not obtained by UAU1 method; flow model biofilm induced; Spider biofilm induced
S137	R.S#ASTPLTPPKVK.K	A0A1D8PI94	-0.30351	0.00484734	Orf19.223	3645776	CAALFM_C208860WA	serine/threonine protein kinase	Putative serine/threonine protein kinase; Hap43-repressed; induced by prostaglandins; possibly an essential gene, disruptants not obtained by UAU1 method; flow model biofilm induced; Spider biofilm induced
S137	R.TRS#ASTPLTPPK.V	A0A1D8PI94	-0.273789	0.0430026	Orf19.223	3645776	CAALFM_C208860WA	serine/threonine protein kinase	Putative serine/threonine protein kinase; Hap43-repressed; induced by prostaglandins; possibly an essential gene, disruptants not obtained by UAU1 method; flow model biofilm induced; Spider biofilm induced
S298	R.VAS#APLVHR.L	A0A1D8PI94	-0.256043	0.00410594	Orf19.223	3645776	CAALFM_C208860WA	serine/threonine protein kinase	Putative serine/threonine protein kinase; Hap43-repressed; induced by prostaglandins; possibly an essential gene, disruptants not obtained by UAU1 method; flow model biofilm induced; Spider biofilm induced
T140	R.SAST#PLTPPKVK.K	A0A1D8PI94	-0.115748	0.0492732	Orf19.223	3645776	CAALFM_C208860WA	serine/threonine protein kinase	Putative serine/threonine protein kinase; Hap43-repressed; induced by prostaglandins; possibly an essential gene, disruptants not obtained by UAU1 method; flow model biofilm induced; Spider biofilm induced
S139	R.SAS#TPLTPPKVK.K	A0A1D8PI94	0.136914	0.0414683	Orf19.223	3645776	CAALFM_C208860WA	serine/threonine protein kinase	Putative serine/threonine protein kinase; Hap43-repressed; induced by prostaglandins; possibly an essential gene, disruptants not obtained by UAU1 method; flow model biofilm induced; Spider biofilm induced
S139	R.SAS#TPLTPPK.V	A0A1D8PI94	0.146819	0.0320492	Orf19.223	3645776	CAALFM_C208860WA	serine/threonine protein kinase	Putative serine/threonine protein kinase; Hap43-repressed; induced by prostaglandins; possibly an essential gene, disruptants not obtained by UAU1 method; flow model biofilm induced; Spider biofilm induced
T140:T143	R.SAST#PLT#PPKVK.K	A0A1D8PI94	0.326737	0.0173545	Orf19.223	3645776	CAALFM_C208860WA	serine/threonine protein kinase	Putative serine/threonine protein kinase; Hap43-repressed; induced by prostaglandins; possibly an essential gene, disruptants not obtained by UAU1 method; flow model biofilm induced; Spider biofilm induced
S139:T143	R.SAS#TPLT#PPKVK.K	A0A1D8PI94	0.32678	0.0240497	Orf19.223	3645776	CAALFM_C208860WA	serine/threonine protein kinase	Putative serine/threonine protein kinase; Hap43-repressed; induced by prostaglandins; possibly an essential gene, disruptants not obtained by UAU1 method; flow model biofilm induced; Spider biofilm induced
S222	R.HNDS#VFSLNENGVLKPPK.I	A0A1D8PI94	0.360665	0.0168813	Orf19.223	3645776	CAALFM_C208860WA	serine/threonine protein kinase	Putative serine/threonine protein kinase; Hap43-repressed; induced by prostaglandins; possibly an essential gene, disruptants not obtained by UAU1 method; flow model biofilm induced; Spider biofilm induced
S122	K.TNS#SLTQEDGKNSGR.T	A0A1D8PI94	0.461833	0.0240819	Orf19.223	3645776	CAALFM_C208860WA	serine/threonine protein kinase	Putative serine/threonine protein kinase; Hap43-repressed; induced by prostaglandins; possibly an essential gene, disruptants not obtained by UAU1 method; flow model biofilm induced; Spider biofilm induced
S264	K.VLAS#PIVSM*TSQQSVANNDKNFEGR.Q	Q59SC9	-0.552003	0.0223065	Orf19.215	3645797	CAALFM_C208920WA	hypothetical protein	Component of a complex containing the Tor2p kinase; possible a role in regulation of cell growth; Spider biofilm induced
S309	R.QRS#NTTYVYKPPAALTIATEGLTGR.S	Q59SC9	-0.423577	0.0213045	Orf19.215	3645797	CAALFM_C208920WA	hypothetical protein	Component of a complex containing the Tor2p kinase; possible a role in regulation of cell growth; Spider biofilm induced
S76	K.TQENES#TLTVIQPK.E	A0A1D8PIF1	-0.214092	0.045799	Orf19.200	3645792	CAALFM_C209040WA	hypothetical protein	Putative nuclear RNA-binding protein; Spider biofilm repressed
S508	R.NVDDPIENADVSQFNIS#DEE.-	A0A1D8PI97	-0.368295	0.00133282	Orf19.199	3645791	CAALFM_C209050CA	hypothetical protein	Protein of unknown function; hyphal-induced expression; upregulated in a cyr1 null mutant
S132	K.S#QQQSQQSSLSSENLFNDNFK.S	A0A1D8PIB8	-1.13104	0.0351637	Orf19.4080	3644092	CAALFM_C209180WA	hypothetical protein	Putative ribonuclease H2 subunit; required for RNase H2 activity; repressed in Spider biofilms by Bcr1, Tec1, Brg1, Rob1
T121	K.NNPPSHPDT#SPTR.K	A0A1D8PIE2	0.534758	0.0161538	Orf19.1600	3647718	CAALFM_C209420WA	hypothetical protein	Ortholog of C. dubliniensis CD36 : Cd36_23530, C. parapsilosis CDC317 : CPAR2_406140, Candida tenuis NRRL Y-1498 : CANTEDRAFT_116829 and Debaryomyces hansenii CBS767 : DEHA2B01826g
S356	K.QTNNLRGS#PPLAK.I	A0A1D8PIE2	1.03392	0.000887021	Orf19.1600	3647718	CAALFM_C209420WA	hypothetical protein	Ortholog of C. dubliniensis CD36 : Cd36_23530, C. parapsilosis CDC317 : CPAR2_406140, Candida tenuis NRRL Y-1498 : CANTEDRAFT_116829 and Debaryomyces hansenii CBS767 : DEHA2B01826g
T162	R.GTRNGDSEQADGDAENEET#D.-	A0A1D8PIF0	-2.34342	0.00114876	Orf19.1389	3643794	CAALFM_C209650WA	hypothetical protein	Ortholog(s) have poly(A) binding activity, role in mRNA metabolic process and cytoplasm localization
S138	K.VIYGTM*KVDDKDES#EEEIENPSVIK.Q	A0A1D8PIF9	0.568573	0.00766913	Orf19.1388	3643793	CAALFM_C209660WA	hypothetical protein	Putative 66S pre-ribosomal particle component; Hap43-induced; F-12/CO2 early biofilm induced
S138	K.VDDKDES#EEEIENPSVIK.Q	A0A1D8PIF9	0.687405	0.00152333	Orf19.1388	3643793	CAALFM_C209660WA	hypothetical protein	Putative 66S pre-ribosomal particle component; Hap43-induced; F-12/CO2 early biofilm induced
S23	R.DLRTQLFSS#PSVGIR.T	A0A1D8PIH1	-1.82527	0.000738465	Orf19.1386	3643791	CAALFM_C209680WA	hypothetical protein	Ortholog(s) have SNAP receptor activity and role in ER to Golgi vesicle-mediated transport, retrograde vesicle-mediated transport, Golgi to ER, vesicle fusion
S41	R.TAS#PYDPSPNNNQAK.Y	A0A1D8PIH1	0.461544	0.0159438	Orf19.1386	3643791	CAALFM_C209680WA	hypothetical protein	Ortholog(s) have SNAP receptor activity and role in ER to Golgi vesicle-mediated transport, retrograde vesicle-mediated transport, Golgi to ER, vesicle fusion
S564	R.FSKENS#PFR.K	A0A1D8PIK1	1.05487	0.000184246	Orf19.1384	3643789	CAALFM_C209690CA	hypothetical protein	#N/A
S175	R.DRDVYDS#DENSEDVLDPYADDAQLDSHASNR.N	A0A1D8PIJ4	-2.74838	0.0142833	Orf19.1381	3643786	CAALFM_C209710CA	hypothetical protein	Ortholog of S. cerevisiae/S. pombe Lsb5; predicted role in actin cortical patch localization, actin filament organization, endocytosis; flow model biofilm induced; Spider biofilm repressed
S446	K.LDKVETSES#IEGNPFGDRNAVTK.S	A0A1D8PIJ4	-0.287789	0.00649385	Orf19.1381	3643786	CAALFM_C209710CA	hypothetical protein	Ortholog of S. cerevisiae/S. pombe Lsb5; predicted role in actin cortical patch localization, actin filament organization, endocytosis; flow model biofilm induced; Spider biofilm repressed
S446	K.LDKVETSES#IEGNPFGDR.N	A0A1D8PIJ4	0.403223	0.0113596	Orf19.1381	3643786	CAALFM_C209710CA	hypothetical protein	Ortholog of S. cerevisiae/S. pombe Lsb5; predicted role in actin cortical patch localization, actin filament organization, endocytosis; flow model biofilm induced; Spider biofilm repressed
T443:S446	K.LDKVET#SES#IEGNPFGDR.N	A0A1D8PIJ4	0.42081	0.0113273	Orf19.1381	3643786	CAALFM_C209710CA	hypothetical protein	Ortholog of S. cerevisiae/S. pombe Lsb5; predicted role in actin cortical patch localization, actin filament organization, endocytosis; flow model biofilm induced; Spider biofilm repressed
S324	K.VLSYLQYVGAGS#PEAK.S	A0A1D8PIJ4	0.966594	0.00155354	Orf19.1381	3643786	CAALFM_C209710CA	hypothetical protein	Ortholog of S. cerevisiae/S. pombe Lsb5; predicted role in actin cortical patch localization, actin filament organization, endocytosis; flow model biofilm induced; Spider biofilm repressed
S460	K.KKS#ITPGPAK.I	A0A1D8PIK9	0.74755	0.000138846	Orf19.1368	3643801	CAALFM_C209820WA	hypothetical protein	Protein of unknown function; flow model biofilm induced; Spider biofilm induced
S155	R.KSRGNDNESS#PLLNTTR.S	Q59YG2	-1.86566	1.06508e-05	Orf19.1364	3643780	CAALFM_C209870WA	hypothetical protein	Ortholog of S. pombe Stm1 G-protein coupled receptor; PQ-loop domains; constitutive expression independent of MTL or white-opaque status; Hap43-repressed
S147	K.RKS#RGNDNESSPLLNTTR.S	Q59YG2	-0.446341	0.0140691	Orf19.1364	3643780	CAALFM_C209870WA	hypothetical protein	Ortholog of S. pombe Stm1 G-protein coupled receptor; PQ-loop domains; constitutive expression independent of MTL or white-opaque status; Hap43-repressed
S197:T205	R.LVYDS#NDDITFAT#DVERVR.T	A0A1D8PII2	-2.59884	0.0222327	Orf19.1363	3643779	CAALFM_C209880CA	hypothetical protein	Putative protein of unknown function; Plc1-regulated; transcript induced by Mnl1 under weak acid stress; flow model, rat catheter, Spider biofilm induced
S197	R.LVYDS#NDDITFATDVER.V	A0A1D8PII2	-1.67729	0.000598538	Orf19.1363	3643779	CAALFM_C209880CA	hypothetical protein	Putative protein of unknown function; Plc1-regulated; transcript induced by Mnl1 under weak acid stress; flow model, rat catheter, Spider biofilm induced
S197	K.RLVYDS#NDDITFATDVERVR.T	A0A1D8PII2	-1.56984	0.000705493	Orf19.1363	3643779	CAALFM_C209880CA	hypothetical protein	Putative protein of unknown function; Plc1-regulated; transcript induced by Mnl1 under weak acid stress; flow model, rat catheter, Spider biofilm induced
S218	R.S#SGGSGKLATDDDDESSNIPSTPPPPPK.K	A0A1D8PII2	-1.4274	0.0134473	Orf19.1363	3643779	CAALFM_C209880CA	hypothetical protein	Putative protein of unknown function; Plc1-regulated; transcript induced by Mnl1 under weak acid stress; flow model, rat catheter, Spider biofilm induced
T227	R.SSGGSGKLAT#DDDDESSNIPSTPPPPPKKK.K	A0A1D8PII2	-1.21874	0.000736482	Orf19.1363	3643779	CAALFM_C209880CA	hypothetical protein	Putative protein of unknown function; Plc1-regulated; transcript induced by Mnl1 under weak acid stress; flow model, rat catheter, Spider biofilm induced
T227	K.LAT#DDDDESSNIPSTPPPPPK.K	A0A1D8PII2	-1.15832	0.00901434	Orf19.1363	3643779	CAALFM_C209880CA	hypothetical protein	Putative protein of unknown function; Plc1-regulated; transcript induced by Mnl1 under weak acid stress; flow model, rat catheter, Spider biofilm induced
T239	R.SSGGSGKLATDDDDESSNIPST#PPPPPKKK.K	A0A1D8PII2	-0.915088	0.0152855	Orf19.1363	3643779	CAALFM_C209880CA	hypothetical protein	Putative protein of unknown function; Plc1-regulated; transcript induced by Mnl1 under weak acid stress; flow model, rat catheter, Spider biofilm induced
S197	R.LVYDS#NDDITFATDVERVR.T	A0A1D8PII2	-0.726324	0.012353	Orf19.1363	3643779	CAALFM_C209880CA	hypothetical protein	Putative protein of unknown function; Plc1-regulated; transcript induced by Mnl1 under weak acid stress; flow model, rat catheter, Spider biofilm induced
T239	R.SSGGSGKLATDDDDESSNIPST#PPPPPK.K	A0A1D8PII2	-0.240177	0.0312768	Orf19.1363	3643779	CAALFM_C209880CA	hypothetical protein	Putative protein of unknown function; Plc1-regulated; transcript induced by Mnl1 under weak acid stress; flow model, rat catheter, Spider biofilm induced
T227	R.SSGGSGKLAT#DDDDESSNIPSTPPPPPK.K	A0A1D8PII2	0.238562	0.0290114	Orf19.1363	3643779	CAALFM_C209880CA	hypothetical protein	Putative protein of unknown function; Plc1-regulated; transcript induced by Mnl1 under weak acid stress; flow model, rat catheter, Spider biofilm induced
T69	R.HSQSGIELPST#TASGALNTPLSR.N	Q59YH1	-1.30224	0.0343762	Orf19.1355	3643820	CAALFM_C209970CA	hypothetical protein	Putative protein of unknown function; stationary phase enriched protein
S80	R.HSQSGIELPSTTASGALNTPLS#R.N	Q59YH1	-1.29118	0.0391813	Orf19.1355	3643820	CAALFM_C209970CA	hypothetical protein	Putative protein of unknown function; stationary phase enriched protein
S62	R.SGNTPSHTPRHSQS#GIELPSTTASGALNTPLSR.N	Q59YH1	-1.24092	0.00876077	Orf19.1355	3643820	CAALFM_C209970CA	hypothetical protein	Putative protein of unknown function; stationary phase enriched protein
S62:S80	R.HSQS#GIELPSTTASGALNTPLS#R.N	Q59YH1	-0.846659	0.0207474	Orf19.1355	3643820	CAALFM_C209970CA	hypothetical protein	Putative protein of unknown function; stationary phase enriched protein
S60	R.HS#QSGIELPSTTASGALNTPLSR.N	Q59YH1	-0.59315	0.0358868	Orf19.1355	3643820	CAALFM_C209970CA	hypothetical protein	Putative protein of unknown function; stationary phase enriched protein
S60:S80	R.HS#QSGIELPSTTASGALNTPLS#RNGSSPK.L	Q59YH1	-0.481143	0.0205512	Orf19.1355	3643820	CAALFM_C209970CA	hypothetical protein	Putative protein of unknown function; stationary phase enriched protein
S84:S85	R.NGS#S#PKLNNNNGNTTTTSSSGRPK.K	Q59YH1	0.713348	0.00720888	Orf19.1355	3643820	CAALFM_C209970CA	hypothetical protein	Putative protein of unknown function; stationary phase enriched protein
S84:S85	R.NGS#S#PKLNNNNGNTTTTSSSGRPKK.E	Q59YH1	0.803662	0.00534493	Orf19.1355	3643820	CAALFM_C209970CA	hypothetical protein	Putative protein of unknown function; stationary phase enriched protein
S125:S128	R.LIVDDEKVSS#IFS#NTPK.G	A0A1D8PIK6	0.397062	0.0069522	Orf19.1785	3643965	CAALFM_C209980WA	hypothetical protein	Protein with a PI31 proteasome regulator domain; Hap43-repressed; flow model biofilm induced
T130	R.LIVDDEKVSSIFSNT#PK.G	A0A1D8PIK6	0.426201	0.00162706	Orf19.1785	3643965	CAALFM_C209980WA	hypothetical protein	Protein with a PI31 proteasome regulator domain; Hap43-repressed; flow model biofilm induced
S124	R.LIVDDEKVS#SIFSNTPK.G	A0A1D8PIK6	0.592746	3.08473e-05	Orf19.1785	3643965	CAALFM_C209980WA	hypothetical protein	Protein with a PI31 proteasome regulator domain; Hap43-repressed; flow model biofilm induced
S125	R.LIVDDEKVSS#IFSNTPK.G	A0A1D8PIK6	1.02654	0.033472	Orf19.1785	3643965	CAALFM_C209980WA	hypothetical protein	Protein with a PI31 proteasome regulator domain; Hap43-repressed; flow model biofilm induced
S177:S180	K.ITS#SDS#LLGK.S	A0A1D8PIN1	0.0731908	0.0177748	Orf19.1764	3643931	CAALFM_C210170CA	hypothetical protein	Protein of unknown function; rat catheter and Spider biofilm induced
S178:S180	K.ITSS#DS#LLGK.S	A0A1D8PIN1	0.105233	0.0431062	Orf19.1764	3643931	CAALFM_C210170CA	hypothetical protein	Protein of unknown function; rat catheter and Spider biofilm induced
S348:S349	R.RVS#S#INDNELTSSKALVGK.A	Q5A5S8	-3.70634	0.000102386	Orf19.5321	3641195	CAALFM_C210460CA	methylenetetrahydrofolate reductase (NAD(P)H)	Ortholog(s) have methylenetetrahydrofolate reductase (NAD(P)H) activity and role in methionine biosynthetic process, one-carbon metabolic process
S348	R.RVS#SINDNELTSSKALVGK.A	Q5A5S8	-2.51394	0.0001421	Orf19.5321	3641195	CAALFM_C210460CA	methylenetetrahydrofolate reductase (NAD(P)H)	Ortholog(s) have methylenetetrahydrofolate reductase (NAD(P)H) activity and role in methionine biosynthetic process, one-carbon metabolic process
S348:S349	R.RVS#S#INDNELTSSK.A	Q5A5S8	-0.250835	0.0216505	Orf19.5321	3641195	CAALFM_C210460CA	methylenetetrahydrofolate reductase (NAD(P)H)	Ortholog(s) have methylenetetrahydrofolate reductase (NAD(P)H) activity and role in methionine biosynthetic process, one-carbon metabolic process
S349	R.RVSS#INDNELTSSK.A	Q5A5S8	-0.23202	0.0132633	Orf19.5321	3641195	CAALFM_C210460CA	methylenetetrahydrofolate reductase (NAD(P)H)	Ortholog(s) have methylenetetrahydrofolate reductase (NAD(P)H) activity and role in methionine biosynthetic process, one-carbon metabolic process
S91:S94	K.AVS#SPS#PPEATPKLPQLPK.N	Q5A5S3	-1.11147	0.00114022	Orf19.5326	3641200	CAALFM_C210540WA	hypothetical protein	Putative transcription factor with zinc finger DNA-binding motif; possible ortholog of S. cerevisiae Mig2p
S92:S94	K.AVSS#PS#PPEATPKLPQLPK.N	Q5A5S3	-0.261392	0.0118987	Orf19.5326	3641200	CAALFM_C210540WA	hypothetical protein	Putative transcription factor with zinc finger DNA-binding motif; possible ortholog of S. cerevisiae Mig2p
S94	K.AVSSPS#PPEATPK.L	Q5A5S3	0.365011	0.0322161	Orf19.5326	3641200	CAALFM_C210540WA	hypothetical protein	Putative transcription factor with zinc finger DNA-binding motif; possible ortholog of S. cerevisiae Mig2p
S132	K.S#LPSLTDYFGKPPPK.S	Q5A5S3	0.947721	0.000216559	Orf19.5326	3641200	CAALFM_C210540WA	hypothetical protein	Putative transcription factor with zinc finger DNA-binding motif; possible ortholog of S. cerevisiae Mig2p
S135	K.SLPS#LTDYFGKPPPK.S	Q5A5S3	1.12463	0.0117838	Orf19.5326	3641200	CAALFM_C210540WA	hypothetical protein	Putative transcription factor with zinc finger DNA-binding motif; possible ortholog of S. cerevisiae Mig2p
S18	K.DIASSVVGS#IGGNK.V	A0A1D8PIS1	0.937404	0.0438541	0	30515168	CAALFM_C210650WA	hypothetical protein	#N/A
S13	K.DIAS#SVVGSIGGNK.V	A0A1D8PIS1	1.19736	0.00935653	0	30515168	CAALFM_C210650WA	hypothetical protein	#N/A
S353	R.RFDS#FEIDSGDEDTRNYRH.-	Q5A5P7	-1.8619	0.0474769	Orf19.5352	3641209	CAALFM_C210720CA	hypothetical protein	Protein with a predicted magnesium transporter domain; mutants are viable
S358	R.FDSFEIDS#GDEDTR.N	Q5A5P7	-0.879776	0.0128571	Orf19.5352	3641209	CAALFM_C210720CA	hypothetical protein	Protein with a predicted magnesium transporter domain; mutants are viable
S331	R.S#M*QINRTSEYDNEESVGLR.R	Q5A5P7	-0.735144	0.024815	Orf19.5352	3641209	CAALFM_C210720CA	hypothetical protein	Protein with a predicted magnesium transporter domain; mutants are viable
S78	R.LM*DEYS#DTDDYLDEQDRILADRIIK.Q	Q5A5P1	-1.16484	0.00084307	Orf19.5358	3641238	CAALFM_C210760CA	origin recognition complex subunit 2	Phosphorylated protein of unknown function
S110	R.GEPDEVNYGS#DVELEIDLTQQRR.T	Q5A5P1	-0.907129	0.0402848	Orf19.5358	3641238	CAALFM_C210760CA	origin recognition complex subunit 2	Phosphorylated protein of unknown function
S110	K.QSRGEPDEVNYGS#DVELEIDLTQQRR.T	Q5A5P1	-0.809878	0.00031714	Orf19.5358	3641238	CAALFM_C210760CA	origin recognition complex subunit 2	Phosphorylated protein of unknown function
Y108	K.QSRGEPDEVNY#GSDVELEIDLTQQRR.T	Q5A5P1	-0.672763	0.0244202	Orf19.5358	3641238	CAALFM_C210760CA	origin recognition complex subunit 2	Phosphorylated protein of unknown function
S177	R.KTS#LSSSPPTVKPTVR.R	Q5A5P1	-0.291012	0.0438535	Orf19.5358	3641238	CAALFM_C210760CA	origin recognition complex subunit 2	Phosphorylated protein of unknown function
S60	R.LVKDLDKS#AR.K	Q5A5P1	0.257398	0.00319828	Orf19.5358	3641238	CAALFM_C210760CA	origin recognition complex subunit 2	Phosphorylated protein of unknown function
S34:T38	R.FSFS#PVKT#PPHGR.A	Q5A5P1	1.68637	0.00018365	Orf19.5358	3641238	CAALFM_C210760CA	origin recognition complex subunit 2	Phosphorylated protein of unknown function
S298,S298	K.ALS#EDYEE.-	Q5A5N5	-0.279126	0.0259549	Orf19.5364	3641243	CAALFM_C210810WA	hypothetical protein	Putative pre-mRNA splicing factor; intron in 5'-UTR; possibly an essential gene, disruptants not obtained by UAU1 method
T350	K.AAVFT#PSSK.H	Q5A7K7	-1.65288	0.000435201	Orf19.5459	3640593	CAALFM_C300130CA	hypothetical protein	mRNA polyadenylation regulating protein; Hap43-repressed; transcript is upregulated in RHE model of oral candidiasis and in clinical isolates from HIV+ patients with oral candidiasis; Spider biofilm repressed
S224	R.GVVVDDSGVDEEDKYS#GVDRRGDELM*AALR.N	Q5A7K7	-1.64502	0.00158449	Orf19.5459	3640593	CAALFM_C300130CA	hypothetical protein	mRNA polyadenylation regulating protein; Hap43-repressed; transcript is upregulated in RHE model of oral candidiasis and in clinical isolates from HIV+ patients with oral candidiasis; Spider biofilm repressed
S364	K.KS#PRPYSNGNVK.K	Q5A7K7	0.796032	5.69174e-05	Orf19.5459	3640593	CAALFM_C300130CA	hypothetical protein	mRNA polyadenylation regulating protein; Hap43-repressed; transcript is upregulated in RHE model of oral candidiasis and in clinical isolates from HIV+ patients with oral candidiasis; Spider biofilm repressed
S114	R.S#LDSSNYILDSLK.Y	Q5A7N5	0.427179	0.00780229	Orf19.5431	3640542	CAALFM_C300360WA	hypothetical protein	Protein of unknown function; Hap43-repressed; Spider biofilm induced
S457,S457	R.LKEASDVS#EEDLLK.Q	Q5A7Q6	-0.486502	0.0384281	Orf19.5410	3640588	CAALFM_C300530CA	hypothetical protein	Ortholog(s) have microtubule plus-end binding activity
S145	K.DLLDDDQS#INEIETIANTNDESNNNTPK.S	Q5A7R0	-0.531739	0.00341413	Orf19.5406	3640584	CAALFM_C300570CA	phosphatase	Predicted plasma membrane associated protein phosphatase; required for normal filamentous growth; mRNA binds She3 and is localized to hyphal tips
S153	K.TILPVSEMMTSPLLS#LSM*LQR.S	Q5A7R4	2.14379	0.0141856	Orf19.5402	6335207	CAALFM_C300590WA	hypothetical protein	Ortholog of Candida albicans WO-1 : CAWG_02394
T134	K.SGNKHNPQYGSLT#PQNLAK.T	A0A1D8PJ46	-1.5888	0.00516498	Orf19.5381	3640530	CAALFM_C300730WA	hypothetical protein	Ortholog(s) have mRNA binding activity
S9	R.SVS#LSSGKDLK.Y	A0A1D8PJ46	0.366244	0.0307124	Orf19.5381	3640530	CAALFM_C300730WA	hypothetical protein	Ortholog(s) have mRNA binding activity
S9:S11	R.SVS#LS#SGKDLK.Y	A0A1D8PJ46	0.538641	0.00352628	Orf19.5381	3640530	CAALFM_C300730WA	hypothetical protein	Ortholog(s) have mRNA binding activity
T82:S86	K.REAT#PPKS#PPRSK.K	A0A1D8PJ08	-0.194686	0.0104876	Orf19.6155	3647757	CAALFM_C300830CA	DNA ligase (ATP)	Ortholog(s) have DNA ligase (ATP) activity and role in DNA ligation, DNA recombination, base-excision repair, lagging strand elongation, maintenance of DNA trinucleotide repeats, mitotic cell cycle, nucleotide-excision repair
T82:S86	K.REAT#PPKS#PPR.S	A0A1D8PJ08	0.320858	0.00327725	Orf19.6155	3647757	CAALFM_C300830CA	DNA ligase (ATP)	Ortholog(s) have DNA ligase (ATP) activity and role in DNA ligation, DNA recombination, base-excision repair, lagging strand elongation, maintenance of DNA trinucleotide repeats, mitotic cell cycle, nucleotide-excision repair
T82:S86	R.EAT#PPKS#PPR.S	A0A1D8PJ08	0.380373	0.00654312	Orf19.6155	3647757	CAALFM_C300830CA	DNA ligase (ATP)	Ortholog(s) have DNA ligase (ATP) activity and role in DNA ligation, DNA recombination, base-excision repair, lagging strand elongation, maintenance of DNA trinucleotide repeats, mitotic cell cycle, nucleotide-excision repair
S242	R.SQTFTAAS#VVNASLLKAANEKAELR.L	A0A1D8PJ10	-4.27416	0.000200478	Orf19.6160	3647748	CAALFM_C300850CA	hypothetical protein	Ortholog(s) have role in eisosome assembly and eisosome, membrane raft, mitochondrion, plasma membrane localization
S162	K.QGATS#LNIDKINKLATK.N	A0A1D8PJ10	-2.68855	0.0105166	Orf19.6160	3647748	CAALFM_C300850CA	hypothetical protein	Ortholog(s) have role in eisosome assembly and eisosome, membrane raft, mitochondrion, plasma membrane localization
S262	K.AELRLNS#LKSNNPATLK.A	A0A1D8PJ10	-2.00971	0.00550476	Orf19.6160	3647748	CAALFM_C300850CA	hypothetical protein	Ortholog(s) have role in eisosome assembly and eisosome, membrane raft, mitochondrion, plasma membrane localization
S242	R.SQTFTAAS#VVNASLLK.A	A0A1D8PJ10	-1.38607	0.00154688	Orf19.6160	3647748	CAALFM_C300850CA	hypothetical protein	Ortholog(s) have role in eisosome assembly and eisosome, membrane raft, mitochondrion, plasma membrane localization
S262:S265	K.AANEKAELRLNS#LKS#NNPATLK.A	A0A1D8PJ10	-1.18175	0.00437636	Orf19.6160	3647748	CAALFM_C300850CA	hypothetical protein	Ortholog(s) have role in eisosome assembly and eisosome, membrane raft, mitochondrion, plasma membrane localization
S179	K.S#LSSRFNPDLDYR.S	A0A1D8PJ10	-1.07613	0.0221944	Orf19.6160	3647748	CAALFM_C300850CA	hypothetical protein	Ortholog(s) have role in eisosome assembly and eisosome, membrane raft, mitochondrion, plasma membrane localization
S711	R.RLS#SIFKYTNTEEKPK.S	A0A1D8PJ10	-1.01065	0.00287623	Orf19.6160	3647748	CAALFM_C300850CA	hypothetical protein	Ortholog(s) have role in eisosome assembly and eisosome, membrane raft, mitochondrion, plasma membrane localization
S235:S242	R.S#QTFTAAS#VVNASLLK.A	A0A1D8PJ10	-0.930722	0.0101575	Orf19.6160	3647748	CAALFM_C300850CA	hypothetical protein	Ortholog(s) have role in eisosome assembly and eisosome, membrane raft, mitochondrion, plasma membrane localization
S235	R.S#QTFTAASVVNASLLK.A	A0A1D8PJ10	-0.92267	0.00871088	Orf19.6160	3647748	CAALFM_C300850CA	hypothetical protein	Ortholog(s) have role in eisosome assembly and eisosome, membrane raft, mitochondrion, plasma membrane localization
T239:S242	R.SQTFT#AAS#VVNASLLK.A	A0A1D8PJ10	-0.778767	0.000209155	Orf19.6160	3647748	CAALFM_C300850CA	hypothetical protein	Ortholog(s) have role in eisosome assembly and eisosome, membrane raft, mitochondrion, plasma membrane localization
T237	R.SQT#FTAASVVNASLLK.A	A0A1D8PJ10	-0.59145	0.0014382	Orf19.6160	3647748	CAALFM_C300850CA	hypothetical protein	Ortholog(s) have role in eisosome assembly and eisosome, membrane raft, mitochondrion, plasma membrane localization
S801	K.DGDVSEFADFEDEVS#LNRKENKGGVFTEEI.-	A0A1D8PJ10	-0.369319	0.00256854	Orf19.6160	3647748	CAALFM_C300850CA	hypothetical protein	Ortholog(s) have role in eisosome assembly and eisosome, membrane raft, mitochondrion, plasma membrane localization
T700	K.RPVTPSAAQSPT#KKK.S	A0A1D8PJ10	-0.299038	0.00820562	Orf19.6160	3647748	CAALFM_C300850CA	hypothetical protein	Ortholog(s) have role in eisosome assembly and eisosome, membrane raft, mitochondrion, plasma membrane localization
T692	K.RPVT#PSAAQSPTKK.K	A0A1D8PJ10	-0.297951	0.0279022	Orf19.6160	3647748	CAALFM_C300850CA	hypothetical protein	Ortholog(s) have role in eisosome assembly and eisosome, membrane raft, mitochondrion, plasma membrane localization
S791	K.SVKDGDVS#EFADFEDEVSLNRK.E	A0A1D8PJ10	0.135558	0.0195335	Orf19.6160	3647748	CAALFM_C300850CA	hypothetical protein	Ortholog(s) have role in eisosome assembly and eisosome, membrane raft, mitochondrion, plasma membrane localization
S625	R.DTSSIFS#GEEPEIK.H	A0A1D8PJ10	0.240483	0.0194649	Orf19.6160	3647748	CAALFM_C300850CA	hypothetical protein	Ortholog(s) have role in eisosome assembly and eisosome, membrane raft, mitochondrion, plasma membrane localization
S711	R.RLS#SIFK.Y	A0A1D8PJ10	0.279222	0.00778014	Orf19.6160	3647748	CAALFM_C300850CA	hypothetical protein	Ortholog(s) have role in eisosome assembly and eisosome, membrane raft, mitochondrion, plasma membrane localization
S622:S625	R.DTSS#IFS#GEEPEIK.H	A0A1D8PJ10	0.295374	0.0390268	Orf19.6160	3647748	CAALFM_C300850CA	hypothetical protein	Ortholog(s) have role in eisosome assembly and eisosome, membrane raft, mitochondrion, plasma membrane localization
S622	K.IRDTSS#IFSGEEPEIK.H	A0A1D8PJ10	0.299854	0.0462884	Orf19.6160	3647748	CAALFM_C300850CA	hypothetical protein	Ortholog(s) have role in eisosome assembly and eisosome, membrane raft, mitochondrion, plasma membrane localization
S622:S625	K.IRDTSS#IFS#GEEPEIK.H	A0A1D8PJ10	0.341907	0.00371991	Orf19.6160	3647748	CAALFM_C300850CA	hypothetical protein	Ortholog(s) have role in eisosome assembly and eisosome, membrane raft, mitochondrion, plasma membrane localization
S784	K.S#VKDGDVSEFADFEDEVSLNRK.E	A0A1D8PJ10	0.344004	0.040132	Orf19.6160	3647748	CAALFM_C300850CA	hypothetical protein	Ortholog(s) have role in eisosome assembly and eisosome, membrane raft, mitochondrion, plasma membrane localization
S108	R.TNTLSS#TTPSTTVK.V	A0A1D8PJ10	0.364003	0.0479072	Orf19.6160	3647748	CAALFM_C300850CA	hypothetical protein	Ortholog(s) have role in eisosome assembly and eisosome, membrane raft, mitochondrion, plasma membrane localization
S801	K.DGDVSEFADFEDEVS#LNRK.E	A0A1D8PJ10	0.368864	0.00097962	Orf19.6160	3647748	CAALFM_C300850CA	hypothetical protein	Ortholog(s) have role in eisosome assembly and eisosome, membrane raft, mitochondrion, plasma membrane localization
S621:S625	R.EEVDEGKIRDTS#SIFS#GEEPEIK.H	A0A1D8PJ10	0.38867	0.034689	Orf19.6160	3647748	CAALFM_C300850CA	hypothetical protein	Ortholog(s) have role in eisosome assembly and eisosome, membrane raft, mitochondrion, plasma membrane localization
S791:S801	K.SVKDGDVS#EFADFEDEVS#LNRK.E	A0A1D8PJ10	0.404902	0.00523092	Orf19.6160	3647748	CAALFM_C300850CA	hypothetical protein	Ortholog(s) have role in eisosome assembly and eisosome, membrane raft, mitochondrion, plasma membrane localization
S262	R.LNS#LKSNNPATLK.A	A0A1D8PJ10	0.418924	0.0268336	Orf19.6160	3647748	CAALFM_C300850CA	hypothetical protein	Ortholog(s) have role in eisosome assembly and eisosome, membrane raft, mitochondrion, plasma membrane localization
S622	R.DTSS#IFSGEEPEIK.H	A0A1D8PJ10	0.432286	0.000495246	Orf19.6160	3647748	CAALFM_C300850CA	hypothetical protein	Ortholog(s) have role in eisosome assembly and eisosome, membrane raft, mitochondrion, plasma membrane localization
S791:S801	K.DGDVS#EFADFEDEVS#LNRK.E	A0A1D8PJ10	0.491716	0.00279684	Orf19.6160	3647748	CAALFM_C300850CA	hypothetical protein	Ortholog(s) have role in eisosome assembly and eisosome, membrane raft, mitochondrion, plasma membrane localization
S694:S698	K.RPVTPS#AAQS#PTKKK.S	A0A1D8PJ10	0.501249	0.0225655	Orf19.6160	3647748	CAALFM_C300850CA	hypothetical protein	Ortholog(s) have role in eisosome assembly and eisosome, membrane raft, mitochondrion, plasma membrane localization
S801	K.DGDVSEFADFEDEVS#LNRKENK.G	A0A1D8PJ10	0.555436	0.00208059	Orf19.6160	3647748	CAALFM_C300850CA	hypothetical protein	Ortholog(s) have role in eisosome assembly and eisosome, membrane raft, mitochondrion, plasma membrane localization
S625	K.IRDTSSIFS#GEEPEIK.H	A0A1D8PJ10	0.568445	0.00468523	Orf19.6160	3647748	CAALFM_C300850CA	hypothetical protein	Ortholog(s) have role in eisosome assembly and eisosome, membrane raft, mitochondrion, plasma membrane localization
S265	R.LNSLKS#NNPATLK.A	A0A1D8PJ10	0.599276	0.000755597	Orf19.6160	3647748	CAALFM_C300850CA	hypothetical protein	Ortholog(s) have role in eisosome assembly and eisosome, membrane raft, mitochondrion, plasma membrane localization
S230	K.HGAGFTDQVS#SQKR.S	A0A1D8PJ10	0.624017	0.00184906	Orf19.6160	3647748	CAALFM_C300850CA	hypothetical protein	Ortholog(s) have role in eisosome assembly and eisosome, membrane raft, mitochondrion, plasma membrane localization
S121	K.VGIPS#M*NSNTIYK.A	A0A1D8PJ10	0.641611	0.000112376	Orf19.6160	3647748	CAALFM_C300850CA	hypothetical protein	Ortholog(s) have role in eisosome assembly and eisosome, membrane raft, mitochondrion, plasma membrane localization
S265	K.S#NNPATLK.A	A0A1D8PJ10	0.680609	0.0312639	Orf19.6160	3647748	CAALFM_C300850CA	hypothetical protein	Ortholog(s) have role in eisosome assembly and eisosome, membrane raft, mitochondrion, plasma membrane localization
S698	K.RPVTPSAAQS#PTK.K	A0A1D8PJ10	0.745413	0.000811504	Orf19.6160	3647748	CAALFM_C300850CA	hypothetical protein	Ortholog(s) have role in eisosome assembly and eisosome, membrane raft, mitochondrion, plasma membrane localization
T161	K.QGAT#SLNIDKINK.L	A0A1D8PJ10	0.769399	4.6559e-05	Orf19.6160	3647748	CAALFM_C300850CA	hypothetical protein	Ortholog(s) have role in eisosome assembly and eisosome, membrane raft, mitochondrion, plasma membrane localization
S262:S265	R.LNS#LKS#NNPATLK.A	A0A1D8PJ10	0.800926	0.00383694	Orf19.6160	3647748	CAALFM_C300850CA	hypothetical protein	Ortholog(s) have role in eisosome assembly and eisosome, membrane raft, mitochondrion, plasma membrane localization
S162	K.QGATS#LNIDKINK.L	A0A1D8PJ10	0.847395	0.00798113	Orf19.6160	3647748	CAALFM_C300850CA	hypothetical protein	Ortholog(s) have role in eisosome assembly and eisosome, membrane raft, mitochondrion, plasma membrane localization
S121:S124	K.VGIPS#M*NS#NTIYK.A	A0A1D8PJ10	1.05046	0.00555036	Orf19.6160	3647748	CAALFM_C300850CA	hypothetical protein	Ortholog(s) have role in eisosome assembly and eisosome, membrane raft, mitochondrion, plasma membrane localization
S510	K.LAELES#KLQEAK.N	A0A1D8PJ10	1.56421	0.00196078	Orf19.6160	3647748	CAALFM_C300850CA	hypothetical protein	Ortholog(s) have role in eisosome assembly and eisosome, membrane raft, mitochondrion, plasma membrane localization
S427	R.KYSVIPTSNTIPLPGDS#PTKTTK.H	A0A1D8PJ21	-0.132591	0.0287898	Orf19.2506	3639828	CAALFM_C301020WA	hypothetical protein	Protein of unknown function; opaque-specific transcript; induced during chlamydospore formation in both C. albicans and C. dubliniensis; Hog1-repressed; Spider biofilm induced
S129	R.NKKS#DNLACHADNILR.M	Q5A9X2	0.702033	0.00276898	Orf19.2512	3639834	CAALFM_C301100WA	hypothetical protein	Ortholog of C. dubliniensis CD36 : Cd36_81000, C. parapsilosis CDC317 : CPAR2_103050, Candida tenuis NRRL Y-1498 : CANTEDRAFT_116326 and Debaryomyces hansenii CBS767 : DEHA2G01958g
S498	K.EM*TSSESSSAAPPPPQES#ESETETGVLNIEGDVIARPK.N	A0A1D8PJ35	-0.870751	0.000508957	Orf19.2515	3639901	CAALFM_C301130CA	hypothetical protein	ZZ-type zinc finger protein; rat catheter and Spider biofilm induced
S305	K.VIKSEENGAIAAEENKSLENVNPS#NETTES.-	A0A1D8PJ67	-0.593576	0.0334099	Orf19.1731	3636612	CAALFM_C301210CA	hypothetical protein	#N/A
T2	-.T#TSPPIQDDEQDEEFKLK.Q	Q5AJ72	0.43432	0.0198539	Orf19.1720	3636620	CAALFM_C301310WA	putative ATPase	Ortholog(s) have role in mitotic recombination
S417	R.VRVESLLVS#PISK.A	Q5AJA5	0.572894	0.00369594	Orf19.1687	3636669	CAALFM_C301560WA	DEAH-box ATP-dependent RNA helicase	Ortholog of S. cerevisiae Prp43, an RNA helicase in the DEAH-box family that functions in both RNA polymerase I and polymerase II transcript metabolism; Hap43-induced gene
S415	R.DLNGTPSS#TTDFINQYNNFK.V	A0A1D8PJ82	-0.853738	0.00686016	Orf19.1684	3636666	CAALFM_C301590WA	hypothetical protein	Ortholog of C. dubliniensis CD36 : Cd36_81500, C. parapsilosis CDC317 : CPAR2_503620, Candida tenuis NRRL Y-1498 : CANTEDRAFT_93693 and Debaryomyces hansenii CBS767 : DEHA2D15268g
S398	K.IAS#QINLNELLR.D	A0A1D8PJ82	0.186664	0.00490879	Orf19.1684	3636666	CAALFM_C301590WA	hypothetical protein	Ortholog of C. dubliniensis CD36 : Cd36_81500, C. parapsilosis CDC317 : CPAR2_503620, Candida tenuis NRRL Y-1498 : CANTEDRAFT_93693 and Debaryomyces hansenii CBS767 : DEHA2D15268g
S18	R.FM*IRIS#M*TKK.S	Q5AJB3	-2.143	0.000183715	Orf19.1678	3636607	CAALFM_C301660WA	hypothetical protein	Protein of unknown function; transcript detected on high-resolution tiling arrays
T84:S87	R.NHLHQTNT#NIS#DQVTSK.T	A0A1D8PJA1	-0.85181	0.0193854	Orf19.1675	3636604	CAALFM_C301690WA	hypothetical protein	Ortholog(s) have role in positive regulation of catalytic activity
S87	R.NHLHQTNTNIS#DQVTSK.T	A0A1D8PJA1	-0.491166	0.0041365	Orf19.1675	3636604	CAALFM_C301690WA	hypothetical protein	Ortholog(s) have role in positive regulation of catalytic activity
S177:S181	R.LKNEFVNNINNGGS#ITDS#EKR.G	A0A1D8PJA1	0.359739	0.00376096	Orf19.1675	3636604	CAALFM_C301690WA	hypothetical protein	Ortholog(s) have role in positive regulation of catalytic activity
S177	R.LKNEFVNNINNGGS#ITDSEKR.G	A0A1D8PJA1	0.464163	0.000717087	Orf19.1675	3636604	CAALFM_C301690WA	hypothetical protein	Ortholog(s) have role in positive regulation of catalytic activity
S177:T179	R.LKNEFVNNINNGGS#IT#DSEKR.G	A0A1D8PJA1	0.493833	0.00134768	Orf19.1675	3636604	CAALFM_C301690WA	hypothetical protein	Ortholog(s) have role in positive regulation of catalytic activity
S988	R.TIDKEAQAQS#PPPKK.K	Q5AJC4	0.347693	0.000602834	Orf19.1667	3636587	CAALFM_C301790CA	hypothetical protein	Protein with a predicted SWI/SNF-related matrix-associated actin-dependent regulator of chromatin subfamily domain; Hap43-repressed gene
T75	R.KNSATSNGSSASTT#PPKR.H	Q5AJC5	-0.531301	0.0417145	Orf19.1666	3636586	CAALFM_C301800CA	hypothetical protein	Ortholog of Dig2, a MAP kinase-responsive inhibitor of Ste12; regulates mating-specific genes and invasive growth in S. cerevisiae; induced by alpha pheromone in SpiderM medium
S101	R.IVS#PGLPPLINESM*K.T	Q5AJC5	-0.242347	0.0157804	Orf19.1666	3636586	CAALFM_C301800CA	hypothetical protein	Ortholog of Dig2, a MAP kinase-responsive inhibitor of Ste12; regulates mating-specific genes and invasive growth in S. cerevisiae; induced by alpha pheromone in SpiderM medium
S186	R.QTVQLPPLNQRPAPKS#PVYASDDSDLNR.L	Q5AJC5	0.88993	0.00345524	Orf19.1666	3636586	CAALFM_C301800CA	hypothetical protein	Ortholog of Dig2, a MAP kinase-responsive inhibitor of Ste12; regulates mating-specific genes and invasive growth in S. cerevisiae; induced by alpha pheromone in SpiderM medium
S412:T415	R.RGS#LNT#LELDNDDNELKPPGNSFIRR.V	A0A1D8PJA9	-0.311194	0.00166063	Orf19.1658	3636561	CAALFM_C301890CA	hypothetical protein	Ortholog(s) have cell cortex, cellular bud neck, cellular bud tip, mating projection tip localization
S28	R.QAS#ISQTQPR.N	A0A1D8PJA9	0.351669	0.000175339	Orf19.1658	3636561	CAALFM_C301890CA	hypothetical protein	Ortholog(s) have cell cortex, cellular bud neck, cellular bud tip, mating projection tip localization
S100	R.M*S#KNPFASALSQSEDKPR.A	A0A1D8PJA9	0.499877	0.00796773	Orf19.1658	3636561	CAALFM_C301890CA	hypothetical protein	Ortholog(s) have cell cortex, cellular bud neck, cellular bud tip, mating projection tip localization
S276	R.YSVPLQLKES#PEEQLLHK.F	A0A1D8PJA2	0.631917	5.89467e-05	Orf19.1656	3636559	CAALFM_C301900CA	hypothetical protein	Protein with a predicted FYVE/PHD zinc finger domain; Hap43-repressed; Spider biofilm induced
S290	K.EVNEVTEATQQS#DNEPEM*TPEEQIAHKIEETGR.L	A0A1D8PJC4	-0.404144	0.0204632	Orf19.1646	3636592	CAALFM_C302020WA	RNA-binding ribosome biosynthesis protein	Ortholog(s) have mRNA binding, rRNA primary transcript binding activity
S290	K.EVNEVTEVTQQS#DNEPELTPEEQIAQKIEETGR.L	Q5AJS6	-0.380706	0.0141619	Orf19.1646	3636592	CAALFM_C302020WA	RNA-binding ribosome biosynthesis protein	Ortholog(s) have mRNA binding, rRNA primary transcript binding activity
T124,T124	K.TKST#SEIDDEIASNPK.L	Q5AJS6	0.260842	0.00986912	Orf19.1646	3636592	CAALFM_C302020WA	RNA-binding ribosome biosynthesis protein	Ortholog(s) have mRNA binding, rRNA primary transcript binding activity
S27,S27	R.TVDSEVFS#DSAAKNLLADQPKLTPK.S	Q5AJF1	-1.56753	0.000773072	Orf19.1642	3636579	CAALFM_C302040CA	hypothetical protein	Ortholog of S. cerevisiae Loc1, a nuclear protein involved in asymmetric localization of ASH1 mRNA in S. cerevisiae; Hap43-induced gene; Spider biofilm induced
S189,S189	R.RADEES#QEQEEESPK.K	Q5AJF1	0.39788	0.0296601	Orf19.1642	3636579	CAALFM_C302040CA	hypothetical protein	Ortholog of S. cerevisiae Loc1, a nuclear protein involved in asymmetric localization of ASH1 mRNA in S. cerevisiae; Hap43-induced gene; Spider biofilm induced
S177	R.TTGTSNLNNIYSHS#RR.N	A0A1D8PJD5	-1.54247	0.0106272	Orf19.1634	3636658	CAALFM_C302120WA	hypothetical protein	Has domain(s) with predicted fatty-acyl-CoA binding activity
T182:S184	R.NTT#LS#LNEYVQQQR.M	A0A1D8PJD5	-0.539047	0.0218565	Orf19.1634	3636658	CAALFM_C302120WA	hypothetical protein	Has domain(s) with predicted fatty-acyl-CoA binding activity
S184	R.NTTLS#LNEYVQQQR.M	A0A1D8PJD5	0.289815	0.0366962	Orf19.1634	3636658	CAALFM_C302120WA	hypothetical protein	Has domain(s) with predicted fatty-acyl-CoA binding activity
S245	R.LS#FEAQLHPHQQTHGQR.I	A0A1D8PJE6	-2.39055	0.0111825	Orf19.1630	3636654	CAALFM_C302160CA	hypothetical protein	Ortholog(s) have mRNA binding activity and cytoplasmic mRNA processing body localization
T366	K.TTVQTLGDVETPEEVQAT#IKKFHENGSPKLR.R	A0A1D8PJE6	-1.75495	0.000371901	Orf19.1630	3636654	CAALFM_C302160CA	hypothetical protein	Ortholog(s) have mRNA binding activity and cytoplasmic mRNA processing body localization
S639	R.GLKEENERVPS#PSSSSSSSSATKTSQNNFEK.S	A0A1D8PJE6	-1.33503	0.00113015	Orf19.1630	3636654	CAALFM_C302160CA	hypothetical protein	Ortholog(s) have mRNA binding activity and cytoplasmic mRNA processing body localization
S526	K.TPTS#PPVQRIDLTIK.E	A0A1D8PJE6	-1.09786	0.00092241	Orf19.1630	3636654	CAALFM_C302160CA	hypothetical protein	Ortholog(s) have mRNA binding activity and cytoplasmic mRNA processing body localization
S245	R.RLS#FEAQLHPHQQTHGQR.I	A0A1D8PJE6	-1.02007	0.00582148	Orf19.1630	3636654	CAALFM_C302160CA	hypothetical protein	Ortholog(s) have mRNA binding activity and cytoplasmic mRNA processing body localization
S265	R.QPS#FDNAFPDTPHPPFGGGGGM*R.Q	A0A1D8PJE6	-0.85346	0.000140935	Orf19.1630	3636654	CAALFM_C302160CA	hypothetical protein	Ortholog(s) have mRNA binding activity and cytoplasmic mRNA processing body localization
S375	K.KFHENGS#PKLR.R	A0A1D8PJE6	-0.832444	0.000524423	Orf19.1630	3636654	CAALFM_C302160CA	hypothetical protein	Ortholog(s) have mRNA binding activity and cytoplasmic mRNA processing body localization
T523	K.KKT#PTSPPVQR.I	A0A1D8PJE6	-0.568551	0.000296	Orf19.1630	3636654	CAALFM_C302160CA	hypothetical protein	Ortholog(s) have mRNA binding activity and cytoplasmic mRNA processing body localization
T525	K.KKTPT#SPPVQR.I	A0A1D8PJE6	-0.526841	0.000764602	Orf19.1630	3636654	CAALFM_C302160CA	hypothetical protein	Ortholog(s) have mRNA binding activity and cytoplasmic mRNA processing body localization
S639	R.GLKEENERVPS#PSSSSSSSSATK.T	A0A1D8PJE6	-0.508934	0.0272666	Orf19.1630	3636654	CAALFM_C302160CA	hypothetical protein	Ortholog(s) have mRNA binding activity and cytoplasmic mRNA processing body localization
S526	K.KKTPTS#PPVQR.I	A0A1D8PJE6	-0.44977	0.00912132	Orf19.1630	3636654	CAALFM_C302160CA	hypothetical protein	Ortholog(s) have mRNA binding activity and cytoplasmic mRNA processing body localization
S526	K.TPTS#PPVQR.I	A0A1D8PJE6	-0.33318	0.00306064	Orf19.1630	3636654	CAALFM_C302160CA	hypothetical protein	Ortholog(s) have mRNA binding activity and cytoplasmic mRNA processing body localization
T366	K.TTVQTLGDVETPEEVQAT#IKKFHENGSPK.L	A0A1D8PJE6	-0.296467	0.0211374	Orf19.1630	3636654	CAALFM_C302160CA	hypothetical protein	Ortholog(s) have mRNA binding activity and cytoplasmic mRNA processing body localization
S567	K.LEKLDLNS#ETLSENGTKESTK.T	A0A1D8PJE6	0.447491	0.0123674	Orf19.1630	3636654	CAALFM_C302160CA	hypothetical protein	Ortholog(s) have mRNA binding activity and cytoplasmic mRNA processing body localization
S396	R.LSSEKRPS#VSILR.R	A0A1D8PJE6	0.732265	0.000717866	Orf19.1630	3636654	CAALFM_C302160CA	hypothetical protein	Ortholog(s) have mRNA binding activity and cytoplasmic mRNA processing body localization
S375	K.FHENGS#PK.L	A0A1D8PJE6	1.22636	0.000110337	Orf19.1630	3636654	CAALFM_C302160CA	hypothetical protein	Ortholog(s) have mRNA binding activity and cytoplasmic mRNA processing body localization
S580	K.IVDSVEEHNKM*EEKS#LDTKTT.-	Q5AJH3	-0.536666	0.0271806	Orf19.1619	3636636	CAALFM_C302260CA	cyclin-dependent serine/threonine protein kinase	Putative kinase subunit of RNA polymerase II carboxy-terminal domain kinase I; possibly an essential gene, disruptants not obtained by UAU1 method
S569	R.SSEIDSKIVDS#VEEHNKM*EEK.S	Q5AJH3	-0.445968	0.0222247	Orf19.1619	3636636	CAALFM_C302260CA	cyclin-dependent serine/threonine protein kinase	Putative kinase subunit of RNA polymerase II carboxy-terminal domain kinase I; possibly an essential gene, disruptants not obtained by UAU1 method
T337	K.IVGANEKPDYT#NR.V	Q5AJH3	0.335962	0.00726096	Orf19.1619	3636636	CAALFM_C302260CA	cyclin-dependent serine/threonine protein kinase	Putative kinase subunit of RNA polymerase II carboxy-terminal domain kinase I; possibly an essential gene, disruptants not obtained by UAU1 method
S560	K.LVNGDDNKNRSS#EIDSK.I	Q5AJH3	0.671979	0.00192685	Orf19.1619	3636636	CAALFM_C302260CA	cyclin-dependent serine/threonine protein kinase	Putative kinase subunit of RNA polymerase II carboxy-terminal domain kinase I; possibly an essential gene, disruptants not obtained by UAU1 method
S532	K.FKYREVS#PETFGLTTR.D	A0A1D8PJF3	-2.87586	0.000420452	Orf19.1609	3636618	CAALFM_C302350WA	hypothetical protein	Ortholog(s) have role in endonucleolytic cleavage in ITS1 to separate SSU-rRNA from 5.8S rRNA and LSU-rRNA from tricistronic rRNA transcript (SSU-rRNA, 5.8S rRNA, LSU-rRNA)
S532	R.EVS#PETFGLTTR.D	A0A1D8PJF3	-0.469704	0.0274603	Orf19.1609	3636618	CAALFM_C302350WA	hypothetical protein	Ortholog(s) have role in endonucleolytic cleavage in ITS1 to separate SSU-rRNA from 5.8S rRNA and LSU-rRNA from tricistronic rRNA transcript (SSU-rRNA, 5.8S rRNA, LSU-rRNA)
S309	R.AFS#DDDEEEEEDVSIQR.S	A0A1D8PJI9	-0.570568	0.00108868	Orf19.229	3638341	CAALFM_C302410CA	ubiquitin-protein ligase	Ortholog(s) have ubiquitin-protein transferase activity and role in protein ubiquitination involved in ubiquitin-dependent protein catabolic process
S211	R.QSVEINEYDS#DDSFIDSR.T	A0A1D8PJI9	-0.352122	0.0434528	Orf19.229	3638341	CAALFM_C302410CA	ubiquitin-protein ligase	Ortholog(s) have ubiquitin-protein transferase activity and role in protein ubiquitination involved in ubiquitin-dependent protein catabolic process
S198	R.AQNLGIKVPS#PSSSSSSK.T	A0A1D8PJG4	0.496538	0.00610413	Orf19.239	3638351	CAALFM_C302490CA	RSC chromatin remodeling complex ATPase subunit	Putative ATP-dependent helicase; induced by nitric oxide
S457	R.HGS#PEVAVENK.S	A0A1D8PJG4	0.61771	0.0144784	Orf19.239	3638351	CAALFM_C302490CA	RSC chromatin remodeling complex ATPase subunit	Putative ATP-dependent helicase; induced by nitric oxide
T149:S153	K.DTDFANEM*SNIRSNT#PSLS#PPPLK.M	A0A1D8PJH4	-0.30293	0.000158677	Orf19.264	3638410	CAALFM_C302720WA	hypothetical protein	Has domain(s) with predicted protein kinase binding activity and role in regulation of cyclin-dependent protein serine/threonine kinase activity
T149:S153	R.SNT#PSLS#PPPLKM*AK.F	A0A1D8PJH4	-0.291285	0.0291045	Orf19.264	3638410	CAALFM_C302720WA	hypothetical protein	Has domain(s) with predicted protein kinase binding activity and role in regulation of cyclin-dependent protein serine/threonine kinase activity
S151:S153	R.SNTPS#LS#PPPLK.M	A0A1D8PJH4	0.389426	0.0127608	Orf19.264	3638410	CAALFM_C302720WA	hypothetical protein	Has domain(s) with predicted protein kinase binding activity and role in regulation of cyclin-dependent protein serine/threonine kinase activity
S147:S153	R.S#NTPSLS#PPPLK.M	A0A1D8PJH4	0.425456	0.000194852	Orf19.264	3638410	CAALFM_C302720WA	hypothetical protein	Has domain(s) with predicted protein kinase binding activity and role in regulation of cyclin-dependent protein serine/threonine kinase activity
S153	R.SNTPSLS#PPPLK.M	A0A1D8PJH4	1.28309	0.000240461	Orf19.264	3638410	CAALFM_C302720WA	hypothetical protein	Has domain(s) with predicted protein kinase binding activity and role in regulation of cyclin-dependent protein serine/threonine kinase activity
S617	K.ESDS#HVANDNGSDSDDIDIKAADAAFVPAK.I	A0A1D8PJL3	-2.27455	0.00156765	Orf19.267	3638413	CAALFM_C302760CA	hypothetical protein	Protein required for normal filamentous growth; mRNA binds She3
S781:S783	R.KVTNDS#DS#DDM*DIDIKTAGAAFVPTR.S	A0A1D8PJL3	-0.627881	0.0167576	Orf19.267	3638413	CAALFM_C302760CA	hypothetical protein	Protein required for normal filamentous growth; mRNA binds She3
S544	K.IVSIS#SDTEVKSK.T	A0A1D8PJL3	-0.278687	0.00431396	Orf19.267	3638413	CAALFM_C302760CA	hypothetical protein	Protein required for normal filamentous growth; mRNA binds She3
S545	K.IVSISS#DTEVKSK.T	A0A1D8PJL3	-0.121563	0.0426212	Orf19.267	3638413	CAALFM_C302760CA	hypothetical protein	Protein required for normal filamentous growth; mRNA binds She3
S781:S783	R.KVTNDS#DS#DDM*DIDIK.T	A0A1D8PJL3	0.170147	0.0198408	Orf19.267	3638413	CAALFM_C302760CA	hypothetical protein	Protein required for normal filamentous growth; mRNA binds She3
S560	K.TSANNLDS#EDTDDIVIKPPVK.N	A0A1D8PJL3	0.224753	0.0114205	Orf19.267	3638413	CAALFM_C302760CA	hypothetical protein	Protein required for normal filamentous growth; mRNA binds She3
S625	K.ESDSHVANDNGS#DSDDIDIK.A	A0A1D8PJL3	0.374122	0.0119449	Orf19.267	3638413	CAALFM_C302760CA	hypothetical protein	Protein required for normal filamentous growth; mRNA binds She3
S508	R.LTVQKDS#QDSDIVKTEEK.V	A0A1D8PJL3	0.459519	0.00640842	Orf19.267	3638413	CAALFM_C302760CA	hypothetical protein	Protein required for normal filamentous growth; mRNA binds She3
S1127	R.LSS#LQNLVNSNKR.S	A0A1D8PJL3	0.477473	0.00148042	Orf19.267	3638413	CAALFM_C302760CA	hypothetical protein	Protein required for normal filamentous growth; mRNA binds She3
S542:S544	K.IVS#IS#SDTEVK.S	A0A1D8PJL3	0.519964	0.0190028	Orf19.267	3638413	CAALFM_C302760CA	hypothetical protein	Protein required for normal filamentous growth; mRNA binds She3
S542:S544	K.IVS#IS#SDTEVKSK.T	A0A1D8PJL3	0.722717	0.00256361	Orf19.267	3638413	CAALFM_C302760CA	hypothetical protein	Protein required for normal filamentous growth; mRNA binds She3
S542:S545	K.IVS#ISS#DTEVK.S	A0A1D8PJL3	0.724916	0.00238945	Orf19.267	3638413	CAALFM_C302760CA	hypothetical protein	Protein required for normal filamentous growth; mRNA binds She3
S508:S511	R.LTVQKDS#QDS#DIVKTEEK.V	A0A1D8PJL3	1.01076	0.0188528	Orf19.267	3638413	CAALFM_C302760CA	hypothetical protein	Protein required for normal filamentous growth; mRNA binds She3
S10	K.IALS#NSNLK.N	A0A1D8PJM6	0.105693	0.0461554	Orf19.273	3638419	CAALFM_C302820CA	hypothetical protein	Ortholog(s) have unfolded protein binding activity, role in sterol biosynthetic process and endoplasmic reticulum localization
S60:S63	R.NDS#NTS#LSKEFEEDSAEIEFK.V	A0A1D8PJM6	0.121446	0.0468521	Orf19.273	3638419	CAALFM_C302820CA	hypothetical protein	Ortholog(s) have unfolded protein binding activity, role in sterol biosynthetic process and endoplasmic reticulum localization
S60	R.NDS#NTSLSKEFEEDSAEIEFKVNSR.L	A0A1D8PJM6	0.217197	0.0298733	Orf19.273	3638419	CAALFM_C302820CA	hypothetical protein	Ortholog(s) have unfolded protein binding activity, role in sterol biosynthetic process and endoplasmic reticulum localization
S56	K.YFDS#GDYAM*QKQM*GGGLK.S	Q5AEI3	-2.72043	4.67068e-05	Orf19.285	3638379	CAALFM_C302920WA	phosphatase regulator	Ortholog of S. cerevisiae Igo2; role in mRNA stabilization of mRNA; Spider biofilm induced
Y53	K.Y#FDSGDYAM*QKQM*GGGLK.S	Q5AEI3	-2.70385	0.00209627	Orf19.285	3638379	CAALFM_C302920WA	phosphatase regulator	Ortholog of S. cerevisiae Igo2; role in mRNA stabilization of mRNA; Spider biofilm induced
S56	K.YFDS#GDYAM*QK.Q	Q5AEI3	0.247448	0.0110812	Orf19.285	3638379	CAALFM_C302920WA	phosphatase regulator	Ortholog of S. cerevisiae Igo2; role in mRNA stabilization of mRNA; Spider biofilm induced
S56	K.KYFDS#GDYAM*QK.Q	Q5AEI3	0.346995	0.012219	Orf19.285	3638379	CAALFM_C302920WA	phosphatase regulator	Ortholog of S. cerevisiae Igo2; role in mRNA stabilization of mRNA; Spider biofilm induced
S97	R.NSIS#ATNAQVLLNGK.S	Q5AEI3	0.405017	0.000525961	Orf19.285	3638379	CAALFM_C302920WA	phosphatase regulator	Ortholog of S. cerevisiae Igo2; role in mRNA stabilization of mRNA; Spider biofilm induced
S95	R.NS#ISATNAQVLLNGK.S	Q5AEI3	0.811045	0.0129668	Orf19.285	3638379	CAALFM_C302920WA	phosphatase regulator	Ortholog of S. cerevisiae Igo2; role in mRNA stabilization of mRNA; Spider biofilm induced
S24	K.NTQQLDLSKLS#PQELR.I	Q5AEI3	0.97009	0.000739935	Orf19.285	3638379	CAALFM_C302920WA	phosphatase regulator	Ortholog of S. cerevisiae Igo2; role in mRNA stabilization of mRNA; Spider biofilm induced
S1447	K.EGEYTSARYS#LDRINTTHEIPGVTQADTLLK.Y	A0A1D8PJN3	-0.89205	0.00159366	Orf19.323	3638318	CAALFM_C303250WA	hypothetical protein	Putative haloacid dehalogenase; localized to plasma membrane
T1417	R.RDT#INDQFQK.H	A0A1D8PJN3	0.656612	0.00903529	Orf19.323	3638318	CAALFM_C303250WA	hypothetical protein	Putative haloacid dehalogenase; localized to plasma membrane
S445,S445	K.EKEESGSSELKNTGESSSSSSGVPPS#PPPPSSNVPR.-	Q5AED9	-0.421359	0.000446723	Orf19.329	3638361	CAALFM_C303300CA	mRNA splicing protein	Putative pre-mRNA branch point binding protein; role in mRNA splicing via spliceosome; Spider biofilm repressed
S95,S95	K.RDPS#PPPKYDKNGNR.T	Q5AED9	-0.257001	0.0211682	Orf19.329	3638361	CAALFM_C303300CA	mRNA splicing protein	Putative pre-mRNA branch point binding protein; role in mRNA splicing via spliceosome; Spider biofilm repressed
S95,S95	R.DPS#PPPKYDK.N	Q5AED9	0.378868	0.0423802	Orf19.329	3638361	CAALFM_C303300CA	mRNA splicing protein	Putative pre-mRNA branch point binding protein; role in mRNA splicing via spliceosome; Spider biofilm repressed
S1030	K.FKS#RTDEDEFEGDEFETRCS.-	Q5AED0	-3.08735	2.07859e-06	Orf19.338	3638353	CAALFM_C303410CA	hypothetical protein	Putative glycoside hydrolase; stationary phase enriched protein; Hog1p-downregulated; shows colony morphology-related gene regulation by Ssn6p
T1032	K.FKSRT#DEDEFEGDEFETRCS.-	Q5AED0	-2.66059	0.00252261	Orf19.338	3638353	CAALFM_C303410CA	hypothetical protein	Putative glycoside hydrolase; stationary phase enriched protein; Hog1p-downregulated; shows colony morphology-related gene regulation by Ssn6p
S1004	K.SISEEELEKLHKVQSGAS#IDSNEAAQLDSDLLGQVR.A	Q5AED0	-1.52661	0.000216093	Orf19.338	3638353	CAALFM_C303410CA	hypothetical protein	Putative glycoside hydrolase; stationary phase enriched protein; Hog1p-downregulated; shows colony morphology-related gene regulation by Ssn6p
S1001	K.SISEEELEKLHKVQS#GASIDSNEAAQLDSDLLGQVR.A	Q5AED0	-1.50585	0.0113212	Orf19.338	3638353	CAALFM_C303410CA	hypothetical protein	Putative glycoside hydrolase; stationary phase enriched protein; Hog1p-downregulated; shows colony morphology-related gene regulation by Ssn6p
S1007	K.SISEEELEKLHKVQSGASIDS#NEAAQLDSDLLGQVR.A	Q5AED0	-1.38761	0.0142414	Orf19.338	3638353	CAALFM_C303410CA	hypothetical protein	Putative glycoside hydrolase; stationary phase enriched protein; Hog1p-downregulated; shows colony morphology-related gene regulation by Ssn6p
S989	K.SIS#EEELEKLHKVQSGASIDSNEAAQLDSDLLGQVR.A	Q5AED0	-0.701069	0.00613795	Orf19.338	3638353	CAALFM_C303410CA	hypothetical protein	Putative glycoside hydrolase; stationary phase enriched protein; Hog1p-downregulated; shows colony morphology-related gene regulation by Ssn6p
S951	R.RKS#GKSLLNLTVNALDLGDEEGSATTK.A	Q5AED0	-0.637533	0.00208327	Orf19.338	3638353	CAALFM_C303410CA	hypothetical protein	Putative glycoside hydrolase; stationary phase enriched protein; Hog1p-downregulated; shows colony morphology-related gene regulation by Ssn6p
S1001:S1004	K.LHKVQS#GAS#IDSNEAAQLDSDLLGQVR.A	Q5AED0	-0.614695	0.0172088	Orf19.338	3638353	CAALFM_C303410CA	hypothetical protein	Putative glycoside hydrolase; stationary phase enriched protein; Hog1p-downregulated; shows colony morphology-related gene regulation by Ssn6p
S1004:S1007	K.VQSGAS#IDS#NEAAQLDSDLLGQVR.A	Q5AED0	-0.609	0.0313625	Orf19.338	3638353	CAALFM_C303410CA	hypothetical protein	Putative glycoside hydrolase; stationary phase enriched protein; Hog1p-downregulated; shows colony morphology-related gene regulation by Ssn6p
S951:S954	R.RKS#GKS#LLNLTVNALDLGDEEGSATTK.A	Q5AED0	-0.4238	0.0492847	Orf19.338	3638353	CAALFM_C303410CA	hypothetical protein	Putative glycoside hydrolase; stationary phase enriched protein; Hog1p-downregulated; shows colony morphology-related gene regulation by Ssn6p
S1030	K.KFKS#RTDEDEFEGDEFETR.C	Q5AED0	0.679425	0.00336164	Orf19.338	3638353	CAALFM_C303410CA	hypothetical protein	Putative glycoside hydrolase; stationary phase enriched protein; Hog1p-downregulated; shows colony morphology-related gene regulation by Ssn6p
S989	K.SIS#EEELEKLHK.V	Q5AED0	0.770962	0.0007153	Orf19.338	3638353	CAALFM_C303410CA	hypothetical protein	Putative glycoside hydrolase; stationary phase enriched protein; Hog1p-downregulated; shows colony morphology-related gene regulation by Ssn6p
S107	R.NLILTKLES#R.V	A0A1D8PJQ4	0.397831	0.0207013	Orf19.341	3638356	CAALFM_C303440CA	hypothetical protein	Putative spermidine export pump; fungal-specific (no human or murine homolog)
S663	R.QQLLENSGSGANNRQNNRIS#R.G	A0A1D8PJR4	-1.94317	0.0462141	Orf19.6952	3645649	CAALFM_C303670WA	hypothetical protein	Ortholog(s) have DNA binding, chromatin binding, histone deacetylase activity
S663	R.QNNRIS#RGATPL.-	A0A1D8PJR4	0.286739	0.0178141	Orf19.6952	3645649	CAALFM_C303670WA	hypothetical protein	Ortholog(s) have DNA binding, chromatin binding, histone deacetylase activity
S663:T667	R.QNNRIS#RGAT#PL.-	A0A1D8PJR4	0.4155	0.0231582	Orf19.6952	3645649	CAALFM_C303670WA	hypothetical protein	Ortholog(s) have DNA binding, chromatin binding, histone deacetylase activity
S518	K.SGS#FTDIFKM*NGETPKVSTIK.T	Q59SS8	-1.23119	0.00271324	Orf19.6941	3645638	CAALFM_C303760WA	diacylglycerol O-acyltransferase	Putative diacylglycerol acyltransferase; catalyzes the terminal step of triacylglycerol formation; flow model biofilm induced; Spider biofilm induced
S516	K.S#GSFTDIFKM*NGETPKVSTIK.T	Q59SS8	-1.12014	0.00139436	Orf19.6941	3645638	CAALFM_C303760WA	diacylglycerol O-acyltransferase	Putative diacylglycerol acyltransferase; catalyzes the terminal step of triacylglycerol formation; flow model biofilm induced; Spider biofilm induced
S168:S169	K.EVLVEETES#S#EDDDEQDLVSER.S	Q59SS8	-0.723724	0.0266326	Orf19.6941	3645638	CAALFM_C303760WA	diacylglycerol O-acyltransferase	Putative diacylglycerol acyltransferase; catalyzes the terminal step of triacylglycerol formation; flow model biofilm induced; Spider biofilm induced
S518	K.KSGS#FTDIFKM*NGETPK.V	Q59SS8	-0.49153	0.000217073	Orf19.6941	3645638	CAALFM_C303760WA	diacylglycerol O-acyltransferase	Putative diacylglycerol acyltransferase; catalyzes the terminal step of triacylglycerol formation; flow model biofilm induced; Spider biofilm induced
S516	K.S#GSFTDIFKM*NGETPK.V	Q59SS8	0.194232	0.0401475	Orf19.6941	3645638	CAALFM_C303760WA	diacylglycerol O-acyltransferase	Putative diacylglycerol acyltransferase; catalyzes the terminal step of triacylglycerol formation; flow model biofilm induced; Spider biofilm induced
S518	K.KSGS#FTDIFK.M	Q59SS8	0.275397	0.0042474	Orf19.6941	3645638	CAALFM_C303760WA	diacylglycerol O-acyltransferase	Putative diacylglycerol acyltransferase; catalyzes the terminal step of triacylglycerol formation; flow model biofilm induced; Spider biofilm induced
S518	K.SGS#FTDIFKM*NGETPK.V	Q59SS8	0.292848	0.0503044	Orf19.6941	3645638	CAALFM_C303760WA	diacylglycerol O-acyltransferase	Putative diacylglycerol acyltransferase; catalyzes the terminal step of triacylglycerol formation; flow model biofilm induced; Spider biofilm induced
T520	K.SGSFT#DIFKM*NGETPK.V	Q59SS8	0.331031	0.0193625	Orf19.6941	3645638	CAALFM_C303760WA	diacylglycerol O-acyltransferase	Putative diacylglycerol acyltransferase; catalyzes the terminal step of triacylglycerol formation; flow model biofilm induced; Spider biofilm induced
S42	K.EEDDDES#DNVVVHR.E	A0A1D8PJT6	0.464444	0.0285747	0	30515197	CAALFM_C303920WA	hypothetical protein	#N/A
T331	K.ESGNLDHPGT#ENEEKEESTK.K	Q5ANP3	-0.268217	0.0351686	Orf19.5857	3635283	CAALFM_C304130WA	hypothetical protein	Ortholog of C. dubliniensis CD36 : Cd36_84070, C. parapsilosis CDC317 : CPAR2_102720, Candida tenuis NRRL Y-1498 : CANTEDRAFT_98617 and Debaryomyces hansenii CBS767 : DEHA2D07392g
S309	K.FDSSKNS#SSELINLEVK.E	Q5ANP3	0.692558	0.0128628	Orf19.5857	3635283	CAALFM_C304130WA	hypothetical protein	Ortholog of C. dubliniensis CD36 : Cd36_84070, C. parapsilosis CDC317 : CPAR2_102720, Candida tenuis NRRL Y-1498 : CANTEDRAFT_98617 and Debaryomyces hansenii CBS767 : DEHA2D07392g
S310	K.FDSSKNSS#SELINLEVK.E	Q5ANP3	0.774362	0.00193405	Orf19.5857	3635283	CAALFM_C304130WA	hypothetical protein	Ortholog of C. dubliniensis CD36 : Cd36_84070, C. parapsilosis CDC317 : CPAR2_102720, Candida tenuis NRRL Y-1498 : CANTEDRAFT_98617 and Debaryomyces hansenii CBS767 : DEHA2D07392g
S310	K.NSS#SELINLEVK.E	Q5ANP3	0.823074	0.0065457	Orf19.5857	3635283	CAALFM_C304130WA	hypothetical protein	Ortholog of C. dubliniensis CD36 : Cd36_84070, C. parapsilosis CDC317 : CPAR2_102720, Candida tenuis NRRL Y-1498 : CANTEDRAFT_98617 and Debaryomyces hansenii CBS767 : DEHA2D07392g
S109	R.SEQRDLEDLES#QTPPRLTTK.Q	A0A1D8PJV5	-0.630342	0.00912667	Orf19.5869	3635140	CAALFM_C304260WA	hypothetical protein	Ortholog(s) have role in metal ion transport, protein targeting to vacuole, ubiquitin-dependent protein catabolic process and endoplasmic reticulum, fungal-type vacuole membrane localization
S428	R.DRNGS#SFM*KLGDLTLNDNLK.N	Q5ANK4	-0.400781	0.0266822	Orf19.5897	3635208	CAALFM_C304460WA	hypothetical protein	Ortholog(s) have role in positive regulation of TORC1 signaling and Seh1-associated complex, cytosol, extrinsic component of fungal-type vacuolar membrane localization
S428:S429	R.DRNGS#S#FM*KLGDLTLNDNLK.N	Q5ANK4	0.355244	0.0202435	Orf19.5897	3635208	CAALFM_C304460WA	hypothetical protein	Ortholog(s) have role in positive regulation of TORC1 signaling and Seh1-associated complex, cytosol, extrinsic component of fungal-type vacuolar membrane localization
S737	R.TILEENDLS#EIDDDEIESVQNQK.E	Q5ANJ1	-0.243705	0.0360883	Orf19.5910	3635262	CAALFM_C304540CA	hypothetical protein	Putative histone acetyltransferase complex subunit; induced upon low-level peroxide stress; Spider biofilm induced
T38	R.LHSIPAST#SEDEDELDPEEFILNKVDKPATK.D	Q5ANG8	-0.816855	0.000619789	Orf19.5935	3635252	CAALFM_C304750WA	hypothetical protein	Ortholog of C. dubliniensis CD36 : Cd36_84710, C. parapsilosis CDC317 : CPAR2_807470, Candida tenuis NRRL Y-1498 : CANTEDRAFT_136475 and Debaryomyces hansenii CBS767 : DEHA2B08844g
S115	K.S#GHFADRM*IEK.L	Q5ANG0	-1.77145	7.25035e-05	Orf19.5943	3635216	CAALFM_C304800CA	hypothetical protein	Ortholog(s) have role in peroxisome organization and peroxisomal membrane localization
S86	R.SGRSGS#IDLTDEQISQIESVPSSADDNGDGNKRK.S	Q5ANG0	-1.01321	0.00413807	Orf19.5943	3635216	CAALFM_C304800CA	hypothetical protein	Ortholog(s) have role in peroxisome organization and peroxisomal membrane localization
S84	R.S#GSIDLTDEQISQIESVPSSADDNGDGNK.R	Q5ANG0	0.565322	0.036698	Orf19.5943	3635216	CAALFM_C304800CA	hypothetical protein	Ortholog(s) have role in peroxisome organization and peroxisomal membrane localization
S56	K.KKKS#PTGNEAALK.N	A0A1D8PK71	-0.509007	0.00327424	0	30515205	CAALFM_C304810CA	hypothetical protein	#N/A
S56	K.S#PTGNEAALK.N	A0A1D8PK71	0.173139	0.0100805	0	30515205	CAALFM_C304810CA	hypothetical protein	#N/A
S45	K.KSDAAPAS#ADPAK.A	A0A1D8PK71	0.230766	0.0385083	0	30515205	CAALFM_C304810CA	hypothetical protein	#N/A
S39	K.NTSSKKS#DAAPASADPAK.A	A0A1D8PK71	0.484693	0.0147726	0	30515205	CAALFM_C304810CA	hypothetical protein	#N/A
S171	R.AAS#IGSIPIIK.L	Q5ANE2	-0.274153	0.0150334	Orf19.5961	3635268	CAALFM_C304920CA	hypothetical protein	Ortholog(s) have role in proteasome regulatory particle assembly, proteolysis and cytosol, nucleus, proteasome regulatory particle localization
S147:S148	K.QINSIIQGYLS#S#DDEEDEEEEVNSKETK.Q	Q5ANC7	-0.30585	0.0222866	Orf19.5976	3635241	CAALFM_C305060WA	hypothetical protein	Protein of unknown function; ortholog of S. cerevisiae Urn1; downregulated by fluphenazine treatment, in azole-resistant strains that overexpress CDR1 and CDR2 or MDR1
S283	K.S#PQTTINEGAFPTVK.L	Q5ANC7	0.390498	0.0237481	Orf19.5976	3635241	CAALFM_C305060WA	hypothetical protein	Protein of unknown function; ortholog of S. cerevisiae Urn1; downregulated by fluphenazine treatment, in azole-resistant strains that overexpress CDR1 and CDR2 or MDR1
S475	K.SKS#ESDLSALQK.V	Q5ANC3	0.330928	0.00214709	Orf19.5980	3635245	CAALFM_C305090CA	hypothetical protein	Protein of unknown function; Hap43-repressed gene
S100	R.SLSSS#SLNKLTITTTQVDQER.S	A0A1D8PK80	-1.71489	0.0311682	Orf19.6966	3643646	CAALFM_C305300CA	bifunctional choline kinase/ethanolamine kinase	Ortholog(s) have choline kinase activity, ethanolamine kinase activity, role in phosphatidylcholine biosynthetic process, phosphatidylethanolamine biosynthetic process and cytosol, nucleus localization
S85	K.NLNNS#SQYLR.R	A0A1D8PK86	0.812794	0.0106517	Orf19.6978	3643681	CAALFM_C305400CA	hypothetical protein	Planktonic growth-induced gene
S582	R.S#LDEREHGPKFLLPM*ER.E	A0A1D8PK91	-0.882416	0.00533378	Orf19.6979	3643665	CAALFM_C305410WA	hypothetical protein	Ortholog(s) have role in cellular manganese ion homeostasis, mitochondrion organization and fungal-type vacuole membrane localization
S671	R.SYKTGGIVES#VVNVQGVSK.V	A0A1D8PK91	-0.660063	0.0166783	Orf19.6979	3643665	CAALFM_C305410WA	hypothetical protein	Ortholog(s) have role in cellular manganese ion homeostasis, mitochondrion organization and fungal-type vacuole membrane localization
Y663:S671	R.SY#KTGGIVES#VVNVQGVSK.V	A0A1D8PK91	-0.577196	0.000288705	Orf19.6979	3643665	CAALFM_C305410WA	hypothetical protein	Ortholog(s) have role in cellular manganese ion homeostasis, mitochondrion organization and fungal-type vacuole membrane localization
S662:S671	R.S#YKTGGIVES#VVNVQGVSK.V	A0A1D8PK91	-0.497005	0.0167501	Orf19.6979	3643665	CAALFM_C305410WA	hypothetical protein	Ortholog(s) have role in cellular manganese ion homeostasis, mitochondrion organization and fungal-type vacuole membrane localization
S662	R.S#YKTGGIVESVVNVQGVSK.V	A0A1D8PK91	-0.405843	0.000135637	Orf19.6979	3643665	CAALFM_C305410WA	hypothetical protein	Ortholog(s) have role in cellular manganese ion homeostasis, mitochondrion organization and fungal-type vacuole membrane localization
S582	R.S#LDEREHGPK.F	A0A1D8PK91	0.251714	0.0412755	Orf19.6979	3643665	CAALFM_C305410WA	hypothetical protein	Ortholog(s) have role in cellular manganese ion homeostasis, mitochondrion organization and fungal-type vacuole membrane localization
Y489	R.QGSESSQISY#TTNNNNTK.N	A0A1D8PK91	0.297809	0.0412543	Orf19.6979	3643665	CAALFM_C305410WA	hypothetical protein	Ortholog(s) have role in cellular manganese ion homeostasis, mitochondrion organization and fungal-type vacuole membrane localization
S671	K.TGGIVES#VVNVQGVSK.V	A0A1D8PK91	0.461135	0.00202552	Orf19.6979	3643665	CAALFM_C305410WA	hypothetical protein	Ortholog(s) have role in cellular manganese ion homeostasis, mitochondrion organization and fungal-type vacuole membrane localization
S469	R.NANANANGNGGRVS#PPLDISER.L	A0A1D8PK91	0.529723	0.0168811	Orf19.6979	3643665	CAALFM_C305410WA	hypothetical protein	Ortholog(s) have role in cellular manganese ion homeostasis, mitochondrion organization and fungal-type vacuole membrane localization
S451	R.NSIDS#SVYR.N	A0A1D8PK91	0.759927	0.0044042	Orf19.6979	3643665	CAALFM_C305410WA	hypothetical protein	Ortholog(s) have role in cellular manganese ion homeostasis, mitochondrion organization and fungal-type vacuole membrane localization
S582	K.GALEEAHRRS#LDER.E	A0A1D8PK91	0.823598	0.0441401	Orf19.6979	3643665	CAALFM_C305410WA	hypothetical protein	Ortholog(s) have role in cellular manganese ion homeostasis, mitochondrion organization and fungal-type vacuole membrane localization
S15	-.PFKNIFTSSSSSSS#LNEDNVIK.S	A0A1D8PK98	-0.362636	0.0285468	Orf19.6980	3643666	CAALFM_C305420WA	putative serine/threonine protein kinase	Has domain(s) with predicted ATP binding, protein kinase activity, protein tyrosine kinase activity and role in protein phosphorylation
S43	K.QRDTSSLSAS#PQSTSSR.I	A0A1D8PK98	0.398124	0.0142623	Orf19.6980	3643666	CAALFM_C305420WA	putative serine/threonine protein kinase	Has domain(s) with predicted ATP binding, protein kinase activity, protein tyrosine kinase activity and role in protein phosphorylation
S182	K.YGS#PGKLLGTGASGSVNLLTSK.N	A0A1D8PK98	0.498587	0.00173411	Orf19.6980	3643666	CAALFM_C305420WA	putative serine/threonine protein kinase	Has domain(s) with predicted ATP binding, protein kinase activity, protein tyrosine kinase activity and role in protein phosphorylation
S15	K.NIFTSSSSSSS#LNEDNVIK.S	A0A1D8PK98	0.911667	0.0265273	Orf19.6980	3643666	CAALFM_C305420WA	putative serine/threonine protein kinase	Has domain(s) with predicted ATP binding, protein kinase activity, protein tyrosine kinase activity and role in protein phosphorylation
S223	R.M*TNEQES#DYKIK.V	A0A1D8PK98	1.80497	3.87515e-05	Orf19.6980	3643666	CAALFM_C305420WA	putative serine/threonine protein kinase	Has domain(s) with predicted ATP binding, protein kinase activity, protein tyrosine kinase activity and role in protein phosphorylation
S203:S206	R.RGS#M*AS#DINIPGGFRR.E	A0A1D8PKB2	0.672278	0.000210088	Orf19.6984	3643670	CAALFM_C305460WA	hypothetical protein	Ortholog of C. dubliniensis CD36 : Cd36_85460, C. parapsilosis CDC317 : CPAR2_405760, Candida tenuis NRRL Y-1498 : CANTEDRAFT_116052 and Debaryomyces hansenii CBS767 : DEHA2D16940g
S91	K.SAS#EETIQELFSVGGNPVKTIK.I	A0A1D8PKD0	-0.827916	0.000692932	Orf19.7368	3641737	CAALFM_C305880CA	hypothetical protein	Ortholog(s) have mRNA binding, poly(U) RNA binding activity and role in nuclear-transcribed mRNA catabolic process, nonsense-mediated decay, regulation of mRNA stability, stress granule assembly
S180	R.SGS#ASNNATSLSPAASPQHVDNPVFHKDAIKSQESIR.A	A0A1D8PKD2	-3.40162	0.0442504	Orf19.7378	3641730	CAALFM_C305970CA	phosphopantothenoylcysteine decarboxylase complex subunit	Ortholog(s) have phosphopantothenoylcysteine decarboxylase activity, protein phosphatase inhibitor activity and role in regulation of mitotic cell cycle, response to salt stress
S178	R.S#GSASNNATSLSPAASPQHVDNPVFHK.D	A0A1D8PKD2	-1.93983	0.0363236	Orf19.7378	3641730	CAALFM_C305970CA	phosphopantothenoylcysteine decarboxylase complex subunit	Ortholog(s) have phosphopantothenoylcysteine decarboxylase activity, protein phosphatase inhibitor activity and role in regulation of mitotic cell cycle, response to salt stress
S180	R.SGS#ASNNATSLSPAASPQHVDNPVFHKDAIK.S	A0A1D8PKD2	-1.48738	0.0339471	Orf19.7378	3641730	CAALFM_C305970CA	phosphopantothenoylcysteine decarboxylase complex subunit	Ortholog(s) have phosphopantothenoylcysteine decarboxylase activity, protein phosphatase inhibitor activity and role in regulation of mitotic cell cycle, response to salt stress
S189	R.SGSASNNATSLS#PAASPQHVDNPVFHK.D	A0A1D8PKD2	-1.41234	0.0233323	Orf19.7378	3641730	CAALFM_C305970CA	phosphopantothenoylcysteine decarboxylase complex subunit	Ortholog(s) have phosphopantothenoylcysteine decarboxylase activity, protein phosphatase inhibitor activity and role in regulation of mitotic cell cycle, response to salt stress
S32	R.SILTKGPSS#PPPTLNQDSNIVHPQPK.H	A0A1D8PKD2	-0.980852	0.00079849	Orf19.7378	3641730	CAALFM_C305970CA	phosphopantothenoylcysteine decarboxylase complex subunit	Ortholog(s) have phosphopantothenoylcysteine decarboxylase activity, protein phosphatase inhibitor activity and role in regulation of mitotic cell cycle, response to salt stress
S31	R.SILTKGPS#SPPPTLNQDSNIVHPQPK.H	A0A1D8PKD2	-0.902363	0.000657908	Orf19.7378	3641730	CAALFM_C305970CA	phosphopantothenoylcysteine decarboxylase complex subunit	Ortholog(s) have phosphopantothenoylcysteine decarboxylase activity, protein phosphatase inhibitor activity and role in regulation of mitotic cell cycle, response to salt stress
S189:S193	R.SGSASNNATSLS#PAAS#PQHVDNPVFHKDAIK.S	A0A1D8PKD2	-0.404561	0.0208255	Orf19.7378	3641730	CAALFM_C305970CA	phosphopantothenoylcysteine decarboxylase complex subunit	Ortholog(s) have phosphopantothenoylcysteine decarboxylase activity, protein phosphatase inhibitor activity and role in regulation of mitotic cell cycle, response to salt stress
S209	K.DAIKS#QESIR.A	A0A1D8PKD2	0.97086	5.36114e-05	Orf19.7378	3641730	CAALFM_C305970CA	phosphopantothenoylcysteine decarboxylase complex subunit	Ortholog(s) have phosphopantothenoylcysteine decarboxylase activity, protein phosphatase inhibitor activity and role in regulation of mitotic cell cycle, response to salt stress
S784	R.NVS#KESTPM*TSETK.Q	A0A1D8PKD8	0.761443	0.00581067	Orf19.7380	3641732	CAALFM_C305990CA	hypothetical protein	Has domain(s) with predicted nucleic acid binding, nucleotide binding activity
S184	R.SVKS#HTELAETANGVR.M	A0A1D8PKE0	-1.37923	0.00280744	Orf19.7393	3641761	CAALFM_C306110CA	NADH/NAD(+) kinase	Predicted NAD+/NADH kinase; possible role in cellular iron ion homeostasis; Spider biofilm induced
S159	K.RLNS#DTFR.K	A0A1D8PKK5	-0.412928	0.0368031	Orf19.7406	3642240	CAALFM_C306260CA	hypothetical protein	Ortholog of C. dubliniensis CD36 : Cd36_86220, C. parapsilosis CDC317 : CPAR2_404490, Candida tenuis NRRL Y-1498 : CANTEDRAFT_94473 and Debaryomyces hansenii CBS767 : DEHA2D01804g
S175	K.DILAIIRES#PNKK.L	A0A1D8PKK5	0.689752	0.000127231	Orf19.7406	3642240	CAALFM_C306260CA	hypothetical protein	Ortholog of C. dubliniensis CD36 : Cd36_86220, C. parapsilosis CDC317 : CPAR2_404490, Candida tenuis NRRL Y-1498 : CANTEDRAFT_94473 and Debaryomyces hansenii CBS767 : DEHA2D01804g
S175	K.DILAIIRES#PNK.K	A0A1D8PKK5	0.901472	0.000437712	Orf19.7406	3642240	CAALFM_C306260CA	hypothetical protein	Ortholog of C. dubliniensis CD36 : Cd36_86220, C. parapsilosis CDC317 : CPAR2_404490, Candida tenuis NRRL Y-1498 : CANTEDRAFT_94473 and Debaryomyces hansenii CBS767 : DEHA2D01804g
S120	K.SEQDLIQDYGS#RDNLAVLEEQTLR.V	A0A1D8PKH1	-0.41644	0.0137824	Orf19.7427	3642262	CAALFM_C306420CA	hypothetical protein	Ortholog(s) have Golgi apparatus, fungal-type vacuole membrane localization
T131	R.DNLAVLEEQT#LR.V	A0A1D8PKH1	-0.17184	0.0301974	Orf19.7427	3642262	CAALFM_C306420CA	hypothetical protein	Ortholog(s) have Golgi apparatus, fungal-type vacuole membrane localization
S919	K.QVTFVLDKSESKELSAS#TPEPLDKDEK.S	A0A1D8PKH4	0.403227	0.0176624	Orf19.7433	3642281	CAALFM_C306440WA	FG-nucleoporin	Ortholog(s) have nucleocytoplasmic transporter activity, structural constituent of nuclear pore activity
T920	K.ELSAST#PEPLDKDEKSK.L	A0A1D8PKH4	0.775506	0.00169071	Orf19.7433	3642281	CAALFM_C306440WA	FG-nucleoporin	Ortholog(s) have nucleocytoplasmic transporter activity, structural constituent of nuclear pore activity
T920	K.ELSAST#PEPLDKDEK.S	A0A1D8PKH4	0.783797	0.0119458	Orf19.7433	3642281	CAALFM_C306440WA	FG-nucleoporin	Ortholog(s) have nucleocytoplasmic transporter activity, structural constituent of nuclear pore activity
S65	K.VQNQQQQSSKDS#DELDSIIDTHPELK.I	A0A1D8PKQ4	0.263964	0.0451446	Orf19.7441	3642289	CAALFM_C306520CA	hypothetical protein	Ortholog(s) have role in cellular lipid metabolic process, nuclear envelope organization and nuclear envelope localization
S70	K.DSDELDS#IIDTHPELK.I	A0A1D8PKQ4	0.284875	0.00916382	Orf19.7441	3642289	CAALFM_C306520CA	hypothetical protein	Ortholog(s) have role in cellular lipid metabolic process, nuclear envelope organization and nuclear envelope localization
S210	R.KISNPEAITSPTSS#PNPSKEPLRQPK.F	A0A1D8PKJ5	-0.634752	0.00702592	Orf19.7450	3642248	CAALFM_C306610WA	hypothetical protein	Ortholog(s) have protein binding, bridging activity, role in septin ring assembly and cellular bud neck septin ring localization
T233:S237	K.FNVT#PHVS#PIVSYSENK.S	A0A1D8PKJ5	0.687111	0.000821606	Orf19.7450	3642248	CAALFM_C306610WA	hypothetical protein	Ortholog(s) have protein binding, bridging activity, role in septin ring assembly and cellular bud neck septin ring localization
S269	R.S#PQGVQVQGLK.N	A0A1D8PKK4	0.446107	0.0108986	Orf19.6832	3638448	CAALFM_C306710WA	hypothetical protein	Protein of unknown function; regulated by Sef1p-, Sfu1p-, and Hap43p
S16	K.RVGTS#TPEAELNPHRAK.A	Q5ADM2	-1.99278	0.000659798	Orf19.6820	3638544	CAALFM_C306820CA	hypothetical protein	Has domain(s) with predicted protein heterodimerization activity, role in DNA-templated transcription, initiation and transcription factor TFIID complex localization
T17	R.VGTST#PEAELNPHRAK.A	Q5ADM2	-1.13106	8.58861e-05	Orf19.6820	3638544	CAALFM_C306820CA	hypothetical protein	Has domain(s) with predicted protein heterodimerization activity, role in DNA-templated transcription, initiation and transcription factor TFIID complex localization
T15:T17	K.RVGT#ST#PEAELNPHRAK.A	Q5ADM2	-0.771364	0.000327911	Orf19.6820	3638544	CAALFM_C306820CA	hypothetical protein	Has domain(s) with predicted protein heterodimerization activity, role in DNA-templated transcription, initiation and transcription factor TFIID complex localization
T17	R.VGTST#PEAELNPHR.A	Q5ADM2	-0.653533	0.00554254	Orf19.6820	3638544	CAALFM_C306820CA	hypothetical protein	Has domain(s) with predicted protein heterodimerization activity, role in DNA-templated transcription, initiation and transcription factor TFIID complex localization
T15:S16	R.VGT#S#TPEAELNPHR.A	Q5ADM2	0.615261	0.0406209	Orf19.6820	3638544	CAALFM_C306820CA	hypothetical protein	Has domain(s) with predicted protein heterodimerization activity, role in DNA-templated transcription, initiation and transcription factor TFIID complex localization
T32	K.DVT#PTPSTTATQATTPKPQR.G	Q5ADM3	-0.60187	0.00846398	Orf19.6818	3638543	CAALFM_C306830CA	putative helicase	Ortholog(s) have mRNA binding activity and cytosol, mitochondrion localization
S581	K.QTTTNTATTTPVETS#SPDVDETIDNENSKKR.G	Q5ADN7	-1.44485	0.00260562	Orf19.6804	3638506	CAALFM_C306970WA	signal recognition particle subunit	Ortholog(s) have role in SRP-dependent cotranslational protein targeting to membrane, translocation and cytosol, nuclear periphery, signal recognition particle, endoplasmic reticulum targeting localization
S107	K.SSIFESS#PQPSIPNTFK.Y	Q5ADQ2	-0.973602	0.000360819	Orf19.6789	3638442	CAALFM_C307110WA	hypothetical protein	S. cerevisiae ortholog Nud1 is a spindle pole body outer plaque component; it acts through the mitotic exit network to specify asymmetric spindle pole body inheritance; Hap43-induced gene
S326	K.NM*KNPES#PLK.L	Q5ADQ2	1.80493	0.000397433	Orf19.6789	3638442	CAALFM_C307110WA	hypothetical protein	S. cerevisiae ortholog Nud1 is a spindle pole body outer plaque component; it acts through the mitotic exit network to specify asymmetric spindle pole body inheritance; Hap43-induced gene
S600	K.RSS#VVGGIVGGGSITSLTALR.E	Q5ADQ8	0.387667	0.0144344	Orf19.6783	3638536	CAALFM_C307170CA	GTPase-activating protein	Putative geranylgeranyltransferase regulatory component
S489	K.LGSS#LINFVPKDKLEIVCK.L	Q5ADQ8	0.577357	0.00585661	Orf19.6783	3638536	CAALFM_C307170CA	GTPase-activating protein	Putative geranylgeranyltransferase regulatory component
S610	R.SSVVGGIVGGGS#ITSLTALR.E	Q5ADQ8	0.921418	0.000715899	Orf19.6783	3638536	CAALFM_C307170CA	GTPase-activating protein	Putative geranylgeranyltransferase regulatory component
S489	K.LGSS#LINFVPK.D	Q5ADQ8	1.43677	0.000589861	Orf19.6783	3638536	CAALFM_C307170CA	GTPase-activating protein	Putative geranylgeranyltransferase regulatory component
S488	K.LGS#SLINFVPK.D	Q5ADQ8	1.50798	0.000350366	Orf19.6783	3638536	CAALFM_C307170CA	GTPase-activating protein	Putative geranylgeranyltransferase regulatory component
S96	R.S#KTLPSPDTPSDVNTLK.Y	Q5ADS1	0.56422	0.00255904	Orf19.6770	3638431	CAALFM_C307280CA	hypothetical protein	protein with ENTH Epsin domain, N-terminal; Spider biofilm repressed
T44,T44	K.SELT#PPAVANPLRPVSK.S	Q5ADS3	0.180595	0.0422377	Orf19.6769	3638430	CAALFM_C307290WA	hypothetical protein	Ortholog(s) have cytoplasm localization
S54	K.VDLSSTFGNS#SGQLPVNVK.I	Q5ADT5	-0.769814	0.013413	Orf19.6756	3638476	CAALFM_C307350WA	hypothetical protein	Ortholog(s) have Rab GTPase binding activity and Golgi apparatus, endoplasmic reticulum localization
S189	R.VSTVSEEEERRS#M*GHK.-	Q5ADT7	-0.339384	0.00829718	Orf19.6754	3638474	CAALFM_C307370WA	hypothetical protein	Protein of unknown function; Spider biofilm induced
S212	K.S#TEEFFEGADIGK.Q	Q5ADU0	0.278496	0.0279734	Orf19.6751	3638471	CAALFM_C307400WA	tRNA methyltransferase	Ortholog(s) have tRNA methyltransferase activity, role in cytoplasmic translation, tRNA methylation and cytosol, nucleus localization
S307	R.FKVDNQSVVNSTES#FH.-	A0A1D8PKR9	-0.335549	0.0501489	Orf19.6747	3638484	CAALFM_C307430WA	acid phosphatase	Ortholog(s) have acid phosphatase activity, role in dephosphorylation, intracellular sterol transport and cytoplasm, nucleus localization
S300:S304:S307	R.FKVDNQS#VVNS#TES#FH.-	A0A1D8PKR9	-0.306352	0.0153313	Orf19.6747	3638484	CAALFM_C307430WA	acid phosphatase	Ortholog(s) have acid phosphatase activity, role in dephosphorylation, intracellular sterol transport and cytoplasm, nucleus localization
S382	K.ESDTNNDKQETES#GEEEGEEDADGHSDVSNSPVER.I	Q5ADU9	-0.418305	0.0136188	Orf19.6742	3638480	CAALFM_C307460WA	protein serine/threonine phosphatase	Ortholog(s) have CTD phosphatase activity, role in dephosphorylation of RNA polymerase II C-terminal domain, negative regulation of G0 to G1 transition and DNA-directed RNA polymerase II, holoenzyme, cytosol localization
S357	K.RKS#IAKLEAAAELAK.E	Q5ADU9	0.48251	0.00829101	Orf19.6742	3638480	CAALFM_C307460WA	protein serine/threonine phosphatase	Ortholog(s) have CTD phosphatase activity, role in dephosphorylation of RNA polymerase II C-terminal domain, negative regulation of G0 to G1 transition and DNA-directed RNA polymerase II, holoenzyme, cytosol localization
T412	R.NPQPDAEQHKEET#ESD.-	A0A1D8PKU6	0.680864	0.00874919	Orf19.6741	3638479	CAALFM_C307470WA	hypothetical protein	Putative plasma membrane protein; predicted role in cell wall integrity; regulated by Nrg1, Tup1; induced during chlamydospore formation in both C. albicans and C. dubliniensis
S145	R.EALEKLSSSINLS#DVPDTNTPPEEAEPKPK.K	Q5ADV1	-0.506108	0.00122256	Orf19.6740	3638529	CAALFM_C307480WA	E3 ubiquitin-protein ligase	Ortholog(s) have ubiquitin-protein transferase activity and role in generation of catalytic spliceosome for first transesterification step
T292	R.SM*YYGDDYDSDDM*EAT#GAEIFDEEYQSRLDAEREDRR.E	Q5ADW5	-1.12887	0.00444983	Orf19.6726	3638491	CAALFM_C307630CA	hypothetical protein	Ortholog(s) have DNA secondary structure binding activity
S286	R.SM*YYGDDYDS#DDM*EATGAEIFDEEYQSRLDAEREDRR.E	Q5ADW5	0.634003	0.0209403	Orf19.6726	3638491	CAALFM_C307630CA	hypothetical protein	Ortholog(s) have DNA secondary structure binding activity
S23	K.LLNDVNIREES#PSRK.K	Q5ADX0	0.581132	0.0312099	Orf19.6722	3638462	CAALFM_C307660WA	hypothetical protein	Protein similar to S. cerevisiae Rad4p; down-regulation associated with azole resistance
S83	R.TTS#NEDQKPDLDLQM*EIERLKLENSALTKK.L	Q5ADY0	-0.578451	0.0132499	Orf19.6712	3638453	CAALFM_C307740WA	hypothetical protein	Ortholog(s) have COPI-coated vesicle, Golgi apparatus localization
T81	R.T#TSNEDQKPDLDLQM*EIERLKLENSALTK.K	Q5ADY0	-0.403555	0.0471856	Orf19.6712	3638453	CAALFM_C307740WA	hypothetical protein	Ortholog(s) have COPI-coated vesicle, Golgi apparatus localization
S83	R.TTS#NEDQKPDLDLQM*EIER.L	Q5ADY0	0.215846	0.0119094	Orf19.6712	3638453	CAALFM_C307740WA	hypothetical protein	Ortholog(s) have COPI-coated vesicle, Golgi apparatus localization
S15	-.TEIPTIIETSETES#FSER.A	A0A1D8PL04	-1.62777	0.000875288	Orf19.6175	3647461	CAALFM_C307800CA	hypothetical protein	Putative 35S rRNA processing protein; Hap43-induced; repressed by prostaglandins; Spider biofilm induced
S11	-.TEIPTIIETS#ETESFSER.A	A0A1D8PL04	-0.273182	0.0345666	Orf19.6175	3647461	CAALFM_C307800CA	hypothetical protein	Putative 35S rRNA processing protein; Hap43-induced; repressed by prostaglandins; Spider biofilm induced
T26	R.AHVPDDT#ASLDDLFADLKK.E	A0A1D8PL04	0.427116	0.0121555	Orf19.6175	3647461	CAALFM_C307800CA	hypothetical protein	Putative 35S rRNA processing protein; Hap43-induced; repressed by prostaglandins; Spider biofilm induced
S28	R.AHVPDDTAS#LDDLFADLKK.E	A0A1D8PL04	0.726875	0.000281033	Orf19.6175	3647461	CAALFM_C307800CA	hypothetical protein	Putative 35S rRNA processing protein; Hap43-induced; repressed by prostaglandins; Spider biofilm induced
S39	K.AVS#EGYKLPGDNTASQQFSGNFQR.V	Q59US8	0.700356	0.00109353	Orf19.5642	3645028	CAALFM_C400170WA	hypothetical protein	Ortholog of S. cerevisiae Dif1; which regulates nuclear localization of Rnr2 and Rnr4; colony morphology-related gene regulation by Ssn6; induced in cyr1 mutant; Spider biofilm induced
S142	K.EVAETKKQASEPQAEGEEEIS#DADE.-	Q59UQ4	-2.31493	0.000561427	Orf19.5666	3645016	CAALFM_C400390WA	chromatin-binding transcription coactivator	Ortholog(s) have chromatin binding, transcription coactivator activity
S142	K.QASEPQAEGEEEIS#DADE.-	Q59UQ4	-0.306211	0.0328243	Orf19.5666	3645016	CAALFM_C400390WA	chromatin-binding transcription coactivator	Ortholog(s) have chromatin binding, transcription coactivator activity
S142	K.KQASEPQAEGEEEIS#DADE.-	Q59UQ4	-0.285444	0.00316384	Orf19.5666	3645016	CAALFM_C400390WA	chromatin-binding transcription coactivator	Ortholog(s) have chromatin binding, transcription coactivator activity
S286:S292	K.EKFTGADS#IAEDES#LSEVSLPPTR.T	A0A1D8PL12	-1.92739	0.0139387	Orf19.5671	3645021	CAALFM_C400420CA	hypothetical protein	Ortholog(s) have enzyme inhibitor activity and role in actin cortical patch assembly, negative regulation of catalytic activity, septin cytoskeleton organization
S487	R.QSSDGIYS#FEAGDDSNPISATPR.S	A0A1D8PL12	-1.45678	0.004729	Orf19.5671	3645021	CAALFM_C400420CA	hypothetical protein	Ortholog(s) have enzyme inhibitor activity and role in actin cortical patch assembly, negative regulation of catalytic activity, septin cytoskeleton organization
S247	R.RNS#SFAKSEK.L	A0A1D8PL12	-1.39392	5.01464e-06	Orf19.5671	3645021	CAALFM_C400420CA	hypothetical protein	Ortholog(s) have enzyme inhibitor activity and role in actin cortical patch assembly, negative regulation of catalytic activity, septin cytoskeleton organization
S462	R.GSLLEKHNLEVQPVSS#PFTTQPPAPVPQASR.S	A0A1D8PL12	-1.06041	0.0209885	Orf19.5671	3645021	CAALFM_C400420CA	hypothetical protein	Ortholog(s) have enzyme inhibitor activity and role in actin cortical patch assembly, negative regulation of catalytic activity, septin cytoskeleton organization
S292	K.EKFTGADSIAEDES#LSEVSLPPTR.T	A0A1D8PL12	-0.773775	0.00215402	Orf19.5671	3645021	CAALFM_C400420CA	hypothetical protein	Ortholog(s) have enzyme inhibitor activity and role in actin cortical patch assembly, negative regulation of catalytic activity, septin cytoskeleton organization
S360	R.QHEQHQQPLSDPLPHAEKPQPEIPQS#PEAPQAK.S	A0A1D8PL12	-0.733417	0.00350475	Orf19.5671	3645021	CAALFM_C400420CA	hypothetical protein	Ortholog(s) have enzyme inhibitor activity and role in actin cortical patch assembly, negative regulation of catalytic activity, septin cytoskeleton organization
S292:S294	K.EKFTGADSIAEDES#LS#EVSLPPTR.T	A0A1D8PL12	-0.62428	0.0114062	Orf19.5671	3645021	CAALFM_C400420CA	hypothetical protein	Ortholog(s) have enzyme inhibitor activity and role in actin cortical patch assembly, negative regulation of catalytic activity, septin cytoskeleton organization
S292:S297	K.EKFTGADSIAEDES#LSEVS#LPPTR.T	A0A1D8PL12	-0.578578	0.000124134	Orf19.5671	3645021	CAALFM_C400420CA	hypothetical protein	Ortholog(s) have enzyme inhibitor activity and role in actin cortical patch assembly, negative regulation of catalytic activity, septin cytoskeleton organization
S478	R.S#RQSSDGIYSFEAGDDSNPISATPR.S	A0A1D8PL12	-0.424112	0.036026	Orf19.5671	3645021	CAALFM_C400420CA	hypothetical protein	Ortholog(s) have enzyme inhibitor activity and role in actin cortical patch assembly, negative regulation of catalytic activity, septin cytoskeleton organization
S481	R.SRQS#SDGIYSFEAGDDSNPISATPR.S	A0A1D8PL12	-0.408013	0.0296433	Orf19.5671	3645021	CAALFM_C400420CA	hypothetical protein	Ortholog(s) have enzyme inhibitor activity and role in actin cortical patch assembly, negative regulation of catalytic activity, septin cytoskeleton organization
S487	R.SRQSSDGIYS#FEAGDDSNPISATPR.S	A0A1D8PL12	-0.353381	0.0216603	Orf19.5671	3645021	CAALFM_C400420CA	hypothetical protein	Ortholog(s) have enzyme inhibitor activity and role in actin cortical patch assembly, negative regulation of catalytic activity, septin cytoskeleton organization
S329	R.FHRDESS#TGISR.Q	A0A1D8PL12	0.371628	0.00426217	Orf19.5671	3645021	CAALFM_C400420CA	hypothetical protein	Ortholog(s) have enzyme inhibitor activity and role in actin cortical patch assembly, negative regulation of catalytic activity, septin cytoskeleton organization
S368	K.S#LEPVSEVQK.E	A0A1D8PL12	0.546318	0.0011679	Orf19.5671	3645021	CAALFM_C400420CA	hypothetical protein	Ortholog(s) have enzyme inhibitor activity and role in actin cortical patch assembly, negative regulation of catalytic activity, septin cytoskeleton organization
S338	R.EQQQKLQGTS#SDLNR.H	A0A1D8PL36	-0.758309	0.00628807	Orf19.4184	3645772	CAALFM_C400590CA	hypothetical protein	Protein with a predicted role in clathrin cage assembly; Hap43-repressed; Spider biofilm repressed
T569	K.IQANAT#GNNPFK.V	A0A1D8PL36	1.33977	0.00272886	Orf19.4184	3645772	CAALFM_C400590CA	hypothetical protein	Protein with a predicted role in clathrin cage assembly; Hap43-repressed; Spider biofilm repressed
S102	K.GVS#ELSISKEEK.L	Q59SK8	0.595965	0.0230696	Orf19.4164	3645760	CAALFM_C400770CA	hypothetical protein	Ortholog(s) have mitochondrion, ribosome localization
S766	K.LSIANDADS#ISDLNKKQSR.T	A0A1D8PL54	-1.26167	0.000204057	Orf19.4163	3645759	CAALFM_C400780CA	hypothetical protein	Ortholog(s) have role in establishment of protein localization to plasma membrane, protein targeting to vacuole, receptor-mediated endocytosis, response to pheromone
S841	K.SFAADTSES#PQQHLEDENLHFNQQK.L	A0A1D8PL54	-0.515102	0.00584411	Orf19.4163	3645759	CAALFM_C400780CA	hypothetical protein	Ortholog(s) have role in establishment of protein localization to plasma membrane, protein targeting to vacuole, receptor-mediated endocytosis, response to pheromone
S807:S811	K.EGPIS#RRGS#LLYNSVQQK.I	A0A1D8PL54	-0.299298	0.00319318	Orf19.4163	3645759	CAALFM_C400780CA	hypothetical protein	Ortholog(s) have role in establishment of protein localization to plasma membrane, protein targeting to vacuole, receptor-mediated endocytosis, response to pheromone
S796	K.RLS#TTISSK.E	A0A1D8PL54	-0.14732	0.0128147	Orf19.4163	3645759	CAALFM_C400780CA	hypothetical protein	Ortholog(s) have role in establishment of protein localization to plasma membrane, protein targeting to vacuole, receptor-mediated endocytosis, response to pheromone
S779	R.TGS#IIGGVGGSRVEK.L	A0A1D8PL54	0.470593	0.00779377	Orf19.4163	3645759	CAALFM_C400780CA	hypothetical protein	Ortholog(s) have role in establishment of protein localization to plasma membrane, protein targeting to vacuole, receptor-mediated endocytosis, response to pheromone
S779	R.TGS#IIGGVGGSR.V	A0A1D8PL54	0.674886	0.00362849	Orf19.4163	3645759	CAALFM_C400780CA	hypothetical protein	Ortholog(s) have role in establishment of protein localization to plasma membrane, protein targeting to vacuole, receptor-mediated endocytosis, response to pheromone
S811	R.RGS#LLYNSVQQK.I	A0A1D8PL54	0.795184	0.00442276	Orf19.4163	3645759	CAALFM_C400780CA	hypothetical protein	Ortholog(s) have role in establishment of protein localization to plasma membrane, protein targeting to vacuole, receptor-mediated endocytosis, response to pheromone
S766:S775	K.LSIANDADS#ISDLNKKQS#R.T	A0A1D8PL54	0.999987	0.00194504	Orf19.4163	3645759	CAALFM_C400780CA	hypothetical protein	Ortholog(s) have role in establishment of protein localization to plasma membrane, protein targeting to vacuole, receptor-mediated endocytosis, response to pheromone
S766	K.LSIANDADS#ISDLNKK.Q	A0A1D8PL54	1.22763	0.00228719	Orf19.4163	3645759	CAALFM_C400780CA	hypothetical protein	Ortholog(s) have role in establishment of protein localization to plasma membrane, protein targeting to vacuole, receptor-mediated endocytosis, response to pheromone
S775	K.LSIANDADSISDLNKKQS#R.T	A0A1D8PL54	1.25279	0.00108967	Orf19.4163	3645759	CAALFM_C400780CA	hypothetical protein	Ortholog(s) have role in establishment of protein localization to plasma membrane, protein targeting to vacuole, receptor-mediated endocytosis, response to pheromone
S766	K.LSIANDADS#ISDLNK.K	A0A1D8PL54	1.27736	0.000170786	Orf19.4163	3645759	CAALFM_C400780CA	hypothetical protein	Ortholog(s) have role in establishment of protein localization to plasma membrane, protein targeting to vacuole, receptor-mediated endocytosis, response to pheromone
S13	R.KVS#TQEQIEDYEKLR.Q	A0A1D8PL51	0.269246	0.00731699	Orf19.4161	3645757	CAALFM_C400800WA	Smc5-Smc6 complex subunit	Ortholog(s) have SUMO transferase activity, role in DNA repair and Smc5-Smc6 complex, nucleus localization
S467	R.QRS#ESTSTVTTNSTVQVTPK.E	A0A1D8PL49	-1.82733	0.0424956	Orf19.4711	3635722	CAALFM_C400840WA	hypothetical protein	Ortholog of C. dubliniensis CD36 : Cd36_40890, C. parapsilosis CDC317 : CPAR2_401100, Candida tenuis NRRL Y-1498 : CANTEDRAFT_119698 and Debaryomyces hansenii CBS767 : DEHA2G22154g
S110	R.GENSASDIDS#FIDNLNK.V	A0A1D8PL49	0.386393	0.0385032	Orf19.4711	3635722	CAALFM_C400840WA	hypothetical protein	Ortholog of C. dubliniensis CD36 : Cd36_40890, C. parapsilosis CDC317 : CPAR2_401100, Candida tenuis NRRL Y-1498 : CANTEDRAFT_119698 and Debaryomyces hansenii CBS767 : DEHA2G22154g
T46	K.EKT#EEVETTEK.S	A0A1D8PL49	0.581827	0.000855982	Orf19.4711	3635722	CAALFM_C400840WA	hypothetical protein	Ortholog of C. dubliniensis CD36 : Cd36_40890, C. parapsilosis CDC317 : CPAR2_401100, Candida tenuis NRRL Y-1498 : CANTEDRAFT_119698 and Debaryomyces hansenii CBS767 : DEHA2G22154g
S283	K.QQESQDEES#ITKDIK.D	A0A1D8PL49	0.611403	0.0111663	Orf19.4711	3635722	CAALFM_C400840WA	hypothetical protein	Ortholog of C. dubliniensis CD36 : Cd36_40890, C. parapsilosis CDC317 : CPAR2_401100, Candida tenuis NRRL Y-1498 : CANTEDRAFT_119698 and Debaryomyces hansenii CBS767 : DEHA2G22154g
T46	K.DLALEPKEKT#EEVETTEK.S	A0A1D8PL49	0.61328	0.00990152	Orf19.4711	3635722	CAALFM_C400840WA	hypothetical protein	Ortholog of C. dubliniensis CD36 : Cd36_40890, C. parapsilosis CDC317 : CPAR2_401100, Candida tenuis NRRL Y-1498 : CANTEDRAFT_119698 and Debaryomyces hansenii CBS767 : DEHA2G22154g
T431:S435	K.EERLT#PAAS#KEDLLPQK.Y	A0A1D8PL49	0.686992	0.00120601	Orf19.4711	3635722	CAALFM_C400840WA	hypothetical protein	Ortholog of C. dubliniensis CD36 : Cd36_40890, C. parapsilosis CDC317 : CPAR2_401100, Candida tenuis NRRL Y-1498 : CANTEDRAFT_119698 and Debaryomyces hansenii CBS767 : DEHA2G22154g
S290	K.VAVAATTTS#PVQVEVIDTK.N	A0A1D8PL91	-1.45623	0.000283623	Orf19.4659	3635700	CAALFM_C401280CA	hypothetical protein	Ortholog(s) have RNA binding activity, role in mRNA splicing, via spliceosome and U2 snRNP, U2-type prespliceosome localization
[truncated: 3,892 more rows]

## Sheet: Each run
sequence	modsites	ref	charge	tp	xcorr_max	dcn_max	ppm_min	localization_max	log2 control	log2 control	log2 control	log2 inhibitor	log2 inhibitor	log2 inhibitor	pvalue	average log2 ratio inhibitor/control
[truncated: 11,500 more rows]
