# Supplementary material for: The Candida albicans Cdk8-dependent phosphoproteome reveals repression of hyphal growth through a Flo8-dependent pathway
Source: PLoS Genet. 2022 Jan 4;18(1):e1009622. doi: 10.1371/journal.pgen.1009622 (PMC8769334; doi:10.1371/journal.pgen.1009622)
Supplement: S4 Table — (XLSX) [file pgen.1009622.s006.xlsx]

## Sheet: Legend
	Table S4: KEGG pathway enrichment analysis of transcripts altered in abundance in the ssn3as strain by 3-MB-PP1 treatment vs vehicle.

## Sheet: Sheet1
		Term	Path ID	Input number	Background number	P-Value
		MAPK signaling pathway - yeast	cal04011	21	143	4e-07
		Phosphatidylinositol signaling system	cal04070	6	30	0.0016
		Inositol phosphate metabolism	cal00562	6	34	0.0028
		RNA transport	cal03013	13	144	0.0042
		Glycerophospholipid metabolism	cal00564	8	72	0.0076
		Metabolic pathways	cal01100	60	1188	0.011
		Alanine, aspartate and glutamate metabolism	cal00250	6	47	0.011
		Regulation of mitophagy - yeast	cal04139	7	62	0.011
		Carbon metabolism	cal01200	13	183	0.024
		Methane metabolism	cal00680	5	45	0.032
		Glycolysis / Gluconeogenesis	cal00010	7	81	0.038
		Ribosome	cal03010	10	141	0.044
		Endocytosis	cal04144	9	123	0.047
		Fructose and mannose metabolism	cal00051	4	35	0.049
